# Supplementary material
Source: Research Square preprint supplement (doi:10.21203/rs.3.rs-9695931/v1)
Supplement: Supplementary file 1 [file 4a470858a36b397f5734faa3.pdf]

# Supplemental Figures:

- 1
- 2
- 3
- 4
- 5
- 6
- 7
- 8
- 9
- 10
- 11
- 12
- 13
- 14
- 15
- 16
- 17
- 18
- 19
- 20
- 21
- 22
- 23
- 24
- 25
- 26
- 27
- 28
- 29
- 30
- 31
- 32
- 33
- 34
- 35
- 36
- 37
- 38
- 39
- 40
- 41
- 42
- 43

44 **Fig. S1: FL-IRE1 $\alpha$ -mNG cluster tracking and diffusion analysis in SNB-19 cells.**

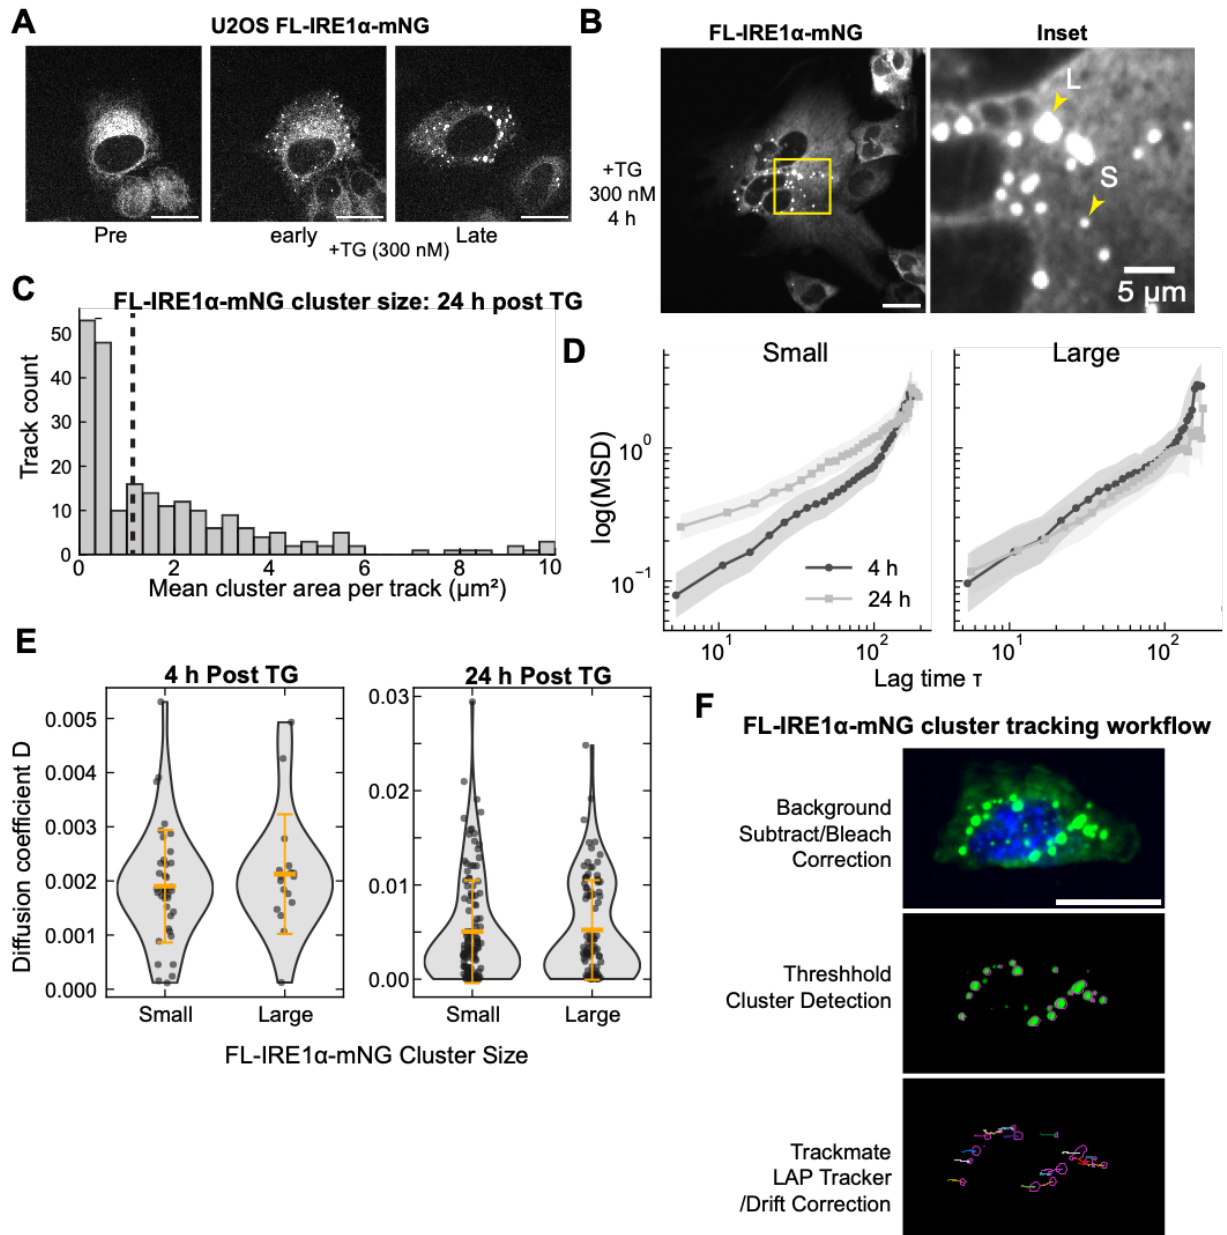

Figure S1: (A) Representative confocal images of FL-IRE1 $\alpha$ -mNG clusters in HEK293T, U2OS, EKVX, and SNB-19 cells following 300 nM TG treatment, illustrating cell-type differences in cluster growth and persistence. Scale bars, 20  $\mu$ m. (B) Schematic showing the cluster area threshold used to define small ( $\leq 1.5 \mu\text{m}^2$ ) versus large ( $> 1.5 \mu\text{m}^2$ ) clusters for downstream MSD analysis. (C) Distribution of cluster areas at 24 h post-TG in SNB-19 cells, illustrating the bimodal size distribution and the threshold applied in B. (D) lag time vs log MSD plots of Small and Large clusters at  $\sim 4$  h post TG vs 24 h post TG treatment. (E) Diffusion coefficient (D) of FL-IRE1 $\alpha$ -mNG clusters binned by cluster area at 24 h post-TG, showing no significant size-dependent change in D, consistent with prior reports. Each point represents a single cluster track. (F) Schematic of cluster tracking process performed using Trackmate/LAP tracker.

46 **Fig. S2: Characterization of opto-IRE1 $\alpha$  expression, phosphorylation, and signaling in**  
 47 **HEK293T cells.**

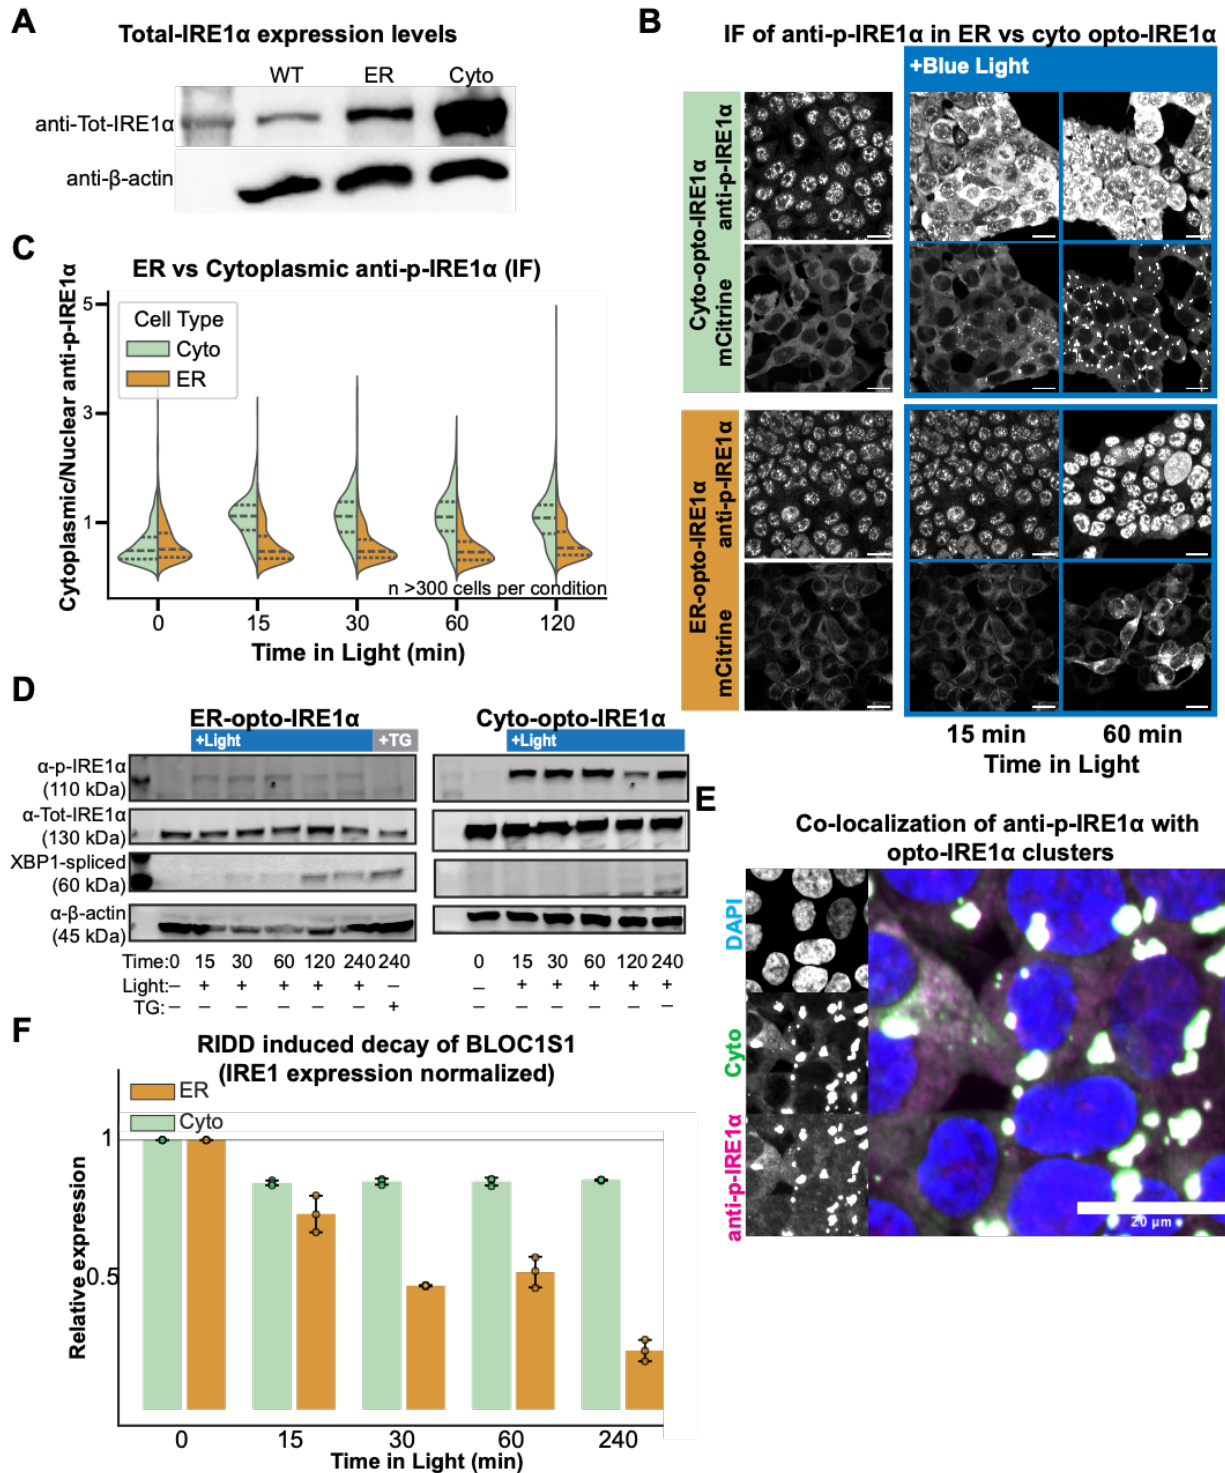

48 *Figure S2: (A) Western blot of whole-cell lysates from wild-type (WT), ER-opto-IRE1 $\alpha$ , and Cyto-opto-IRE1 $\alpha$*   
 49 *HEK293T cells probed with anti-total-IRE1 $\alpha$ , showing that Cyto-opto-IRE1 $\alpha$  requires ~4-fold higher expression*  
 50 *than ER-opto-IRE1 $\alpha$  for robust optogenetic clustering.  $\beta$ -actin is shown as a loading control. (B) Representative*  
 51 *immunofluorescence images of HEK293T ER- and Cyto-opto-IRE1 $\alpha$  cells stained with anti-p-IRE1 $\alpha$  (S724) in dark*  
 52 *conditions and after 240 min of illumination. mCitrine signal marks opto-IRE1 $\alpha$  constructs. Scale bars, 20  $\mu$ m. (C)*  
 53

54 *Quantification of cytoplasmic/nuclear mean fluorescence intensity ratio for anti-p-IRE1 $\alpha$  (S724) over time in*  
55 *illuminated HEK293T ER- and Cyto-opto-IRE1 $\alpha$  cells, showing elevated and sustained phosphorylation in Cyto-*  
56 *opto-IRE1 $\alpha$ . Data shown are mean  $\pm$  s.e.m.;  $n > 300$  cells per time point. (D) Time-course western blot of HEK293T*  
57 *ER- and Cyto-opto-IRE1 $\alpha$  cell lysates probed for anti-p-IRE1 $\alpha$  (S724), anti-total-IRE1 $\alpha$ , anti-XBP1s, and anti- $\beta$ -*  
58 *actin (loading control), confirming delayed XBP1s induction in Cyto-opto-IRE1 $\alpha$  despite higher phosphorylation*  
59 *levels. (E) Representative immunofluorescence image of Cyto-opto-IRE1 $\alpha$  cells co-stained with anti-p-IRE1 $\alpha$  (S724)*  
60 *and imaged for mCitrine, demonstrating co-localization of phosphorylation signal with cytoplasmic clusters and*  
61 *confirming that hyperclusters are catalytically active. Scale bar, 20  $\mu$ m. (F) qRT-PCR of the canonical RIDD*  
62 *substrate BLOC1S1 under actinomycin D-mediated transcriptional arrest in ER- and Cyto-opto-IRE1 $\alpha$  cells at 0,*  
63 *15, 30, 60, and 240 min of illumination. Values are normalized to total IRE1 $\alpha$  expression levels. ER-opto-IRE1 $\alpha$*   
64 *drives more efficient BLOC1S1 decay per IRE1 $\alpha$  molecule. Data shown are mean  $\pm$  s.e.m. of  $n = 3$  biological*  
65 *replicates.*

66

67

68

69

70

71

72

73

74

75

76

77

78

79

80

81

82

83

84

85

86

87

88

89

90

91

92

93

94

95

96

97 **Fig. S3: Topology-dependent IRE1 $\alpha$  signaling and growth arrest are recapitulated in U2OS**  
 98 **cells.**

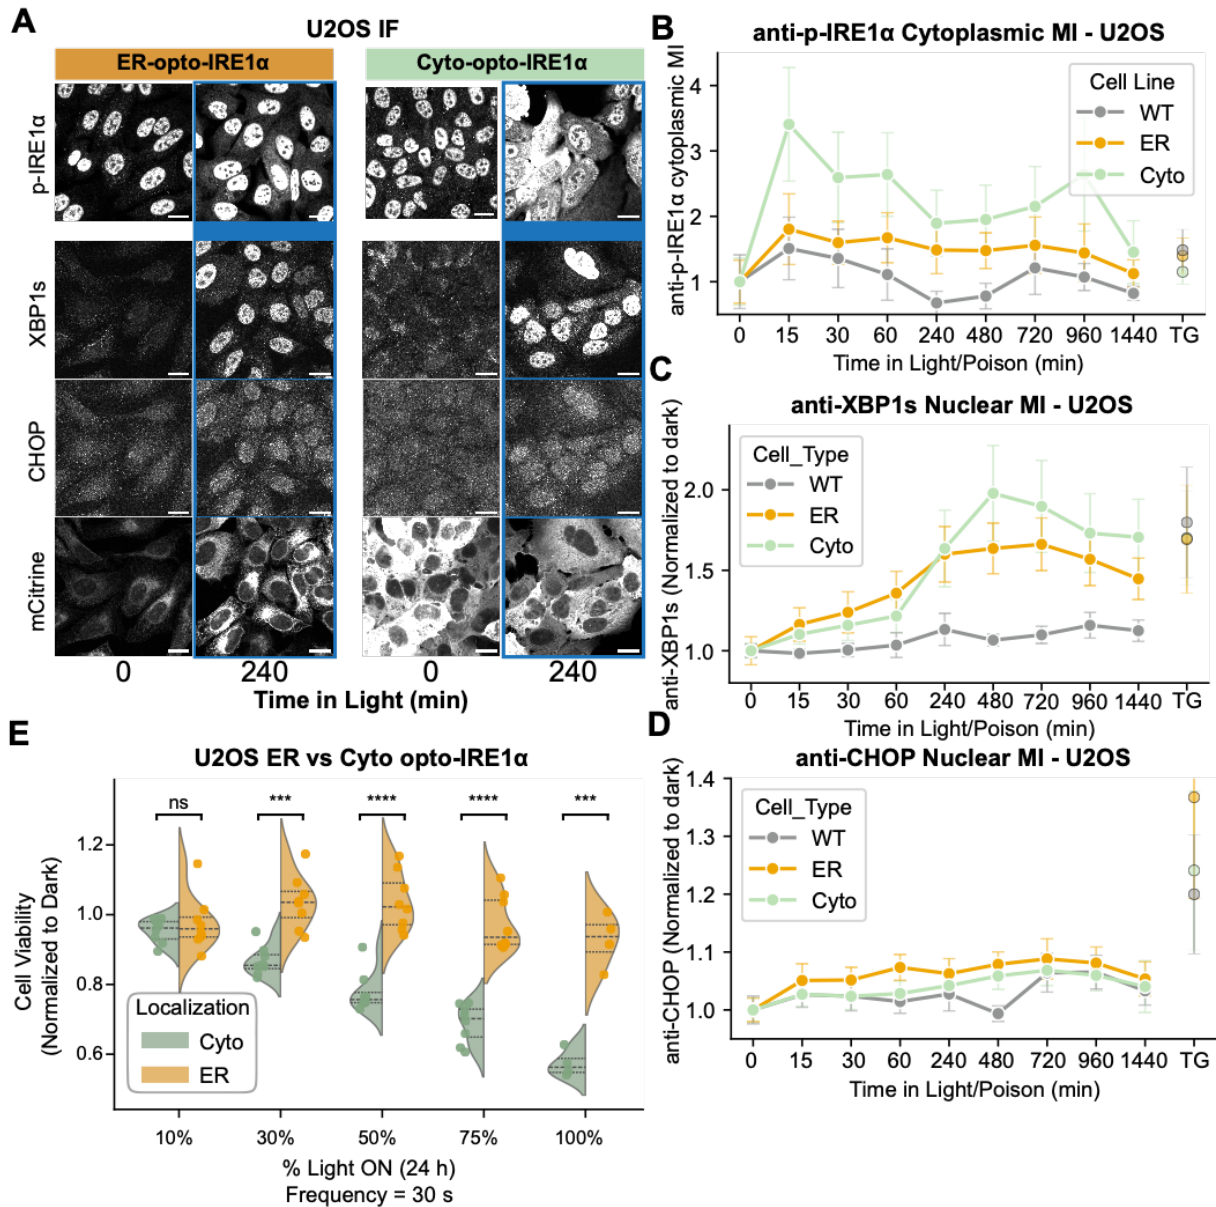

99 *Figure S3: (A) Representative immunofluorescence images of U2OS ER- and Cyto-opto-IRE1 $\alpha$  cells stained for*  
 100 *anti-XBP1s, anti-p-IRE1 $\alpha$  (S724), and anti-CHOP after 240 min of illumination. 300 nM TG for 4 h serves as a*  
 101 *positive control for CHOP induction. Scale bars, 20  $\mu$ m. (B-D), Quantification of mean fluorescence intensity for*  
 102 *anti-XBP1s (B), anti-p-IRE1 $\alpha$  (S724) (C), and anti-CHOP (D) in U2OS ER- and Cyto-opto-IRE1 $\alpha$  cells, normalized*  
 103 *to respective dark controls. Positive control: 300 nM TG for 4 h. Data shown are mean  $\pm$  s.e.m.;  $n \geq 300$  cells per*  
 104 *condition. (E) Resazurin cell viability assay of U2OS ER- and Cyto-opto-IRE1 $\alpha$  cells after 24 h of illumination at*  
 105 *varying light duty cycles, normalized to dark controls. Growth arrest is observed selectively in Cyto-opto-IRE1 $\alpha$*   
 106 *cells. Data shown are mean  $\pm$  s.e.m.;  $n = 5$  replicate wells. Independent t-test comparing ER versus Cyto at each*  
 107 *duty cycle; \*\*\* $p < 0.001$ , \*\*\*\* $p < 0.0001$ .*  
 108

109  
 110

111 Fig. S4: Quality control and validation of the time-series bulk RNA-seq dataset.

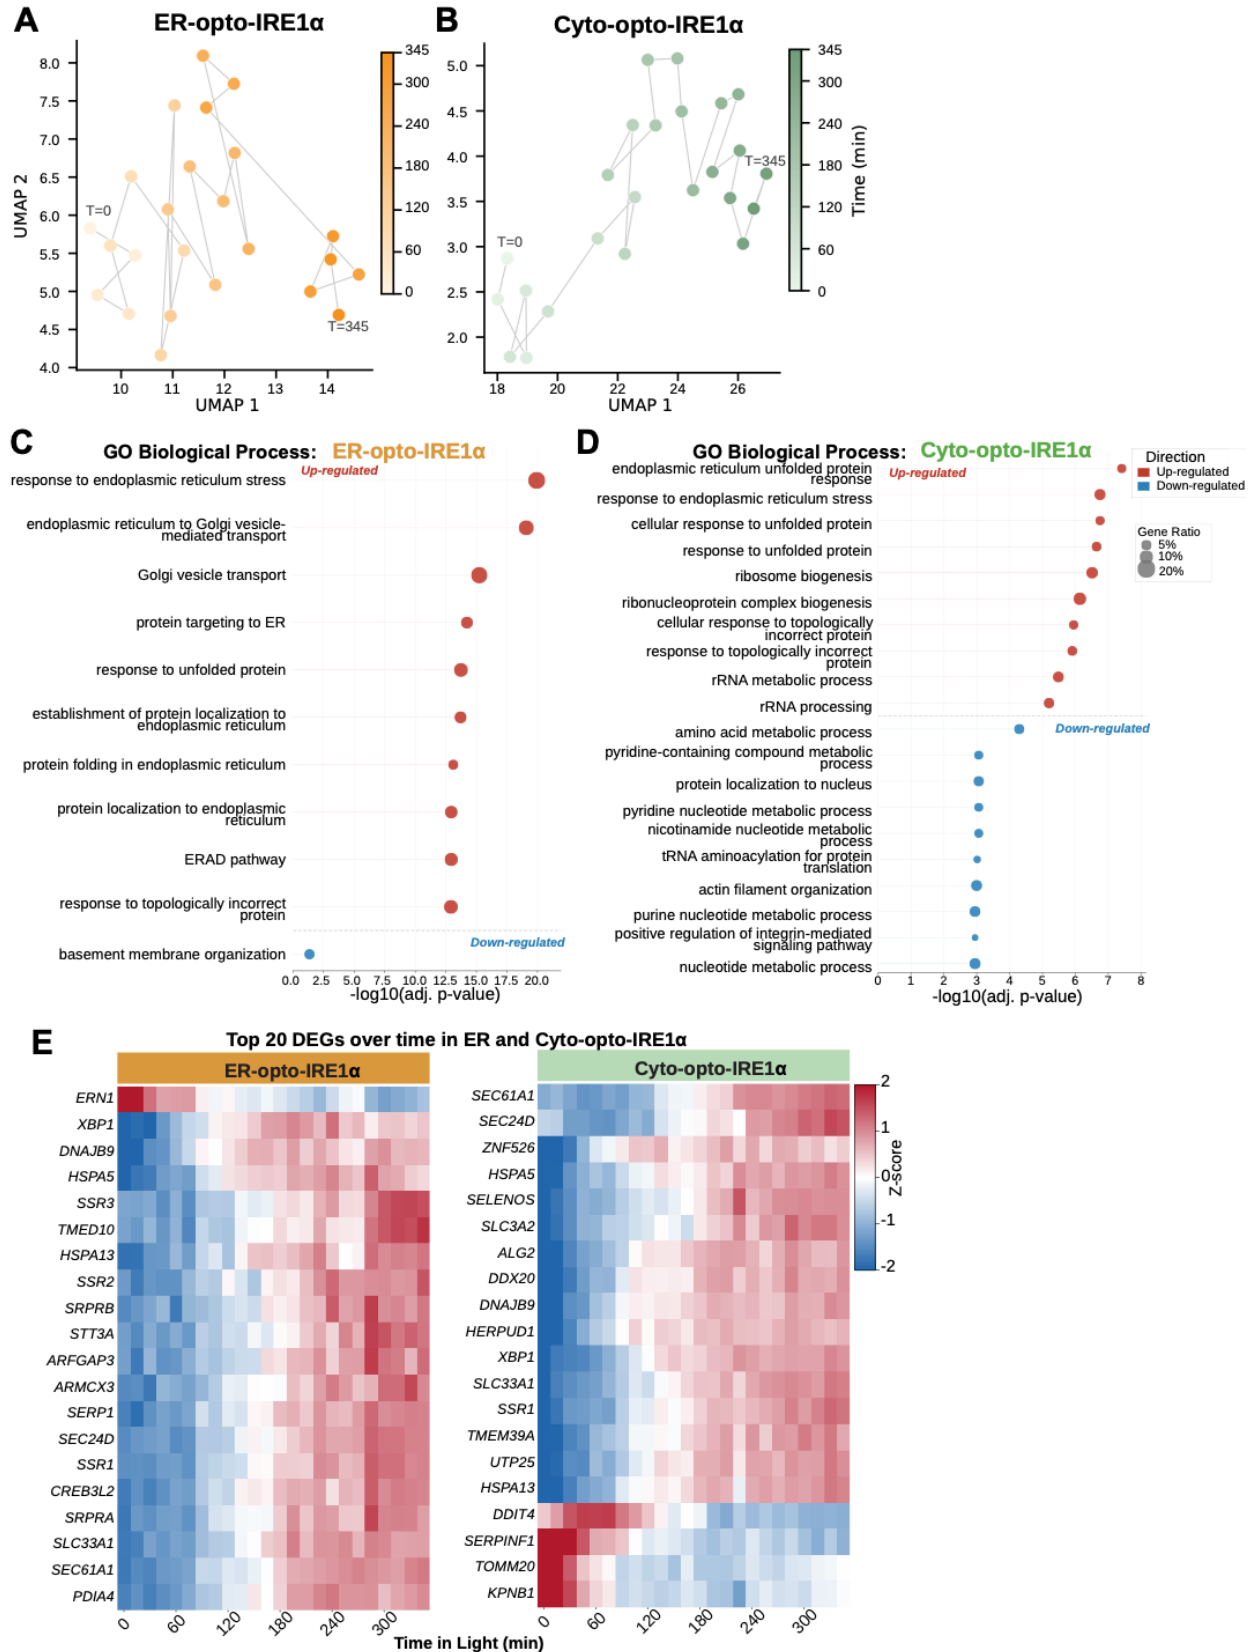

112 *Figure S4: (A, B) UMAP projections of all 48 RNA-seq samples (24 ER-opto-IRE1 $\alpha$  and 24 Cyto-opto-IRE1 $\alpha$ ; 0–345*  
113 *min, 15 min intervals). Samples cluster by both construct identity and time, confirming high sample quality and*  
114 *dynamic transcriptional responses. (C, D) Gene Ontology Biological Process enrichment for the top differentially*  
115 *expressed genes from DESeq2 analysis with spline fitting in ER-opto-IRE1 $\alpha$  (c) and Cyto-opto-IRE1 $\alpha$  (d) cells. Both*  
116 *conditions show enrichment for canonical ER stress response terms. (E) Z-scored heatmap of the top 20 DEGs (by*  
117 *adjusted p-value) for ER- and Cyto-opto-IRE1 $\alpha$  across all time points, illustrating construct-specific gene activation*  
118 *patterns and validating that each optogenetic construct engages the expected IRE1 $\alpha$  signaling program.*

119  
120  
121  
122  
123  
124  
125  
126  
127  
128  
129  
130  
131  
132  
133  
134  
135  
136  
137  
138  
139  
140  
141  
142  
143  
144  
145  
146  
147  
148  
149  
150  
151  
152  
153  
154  
155  
156  
157

158 **Fig. S5: Cytoplasmic IRE1 $\alpha$  drives topology-dependent transcript decay, spliceosome**  
 159 **induction, and cell-cycle arrest without apoptosis.**

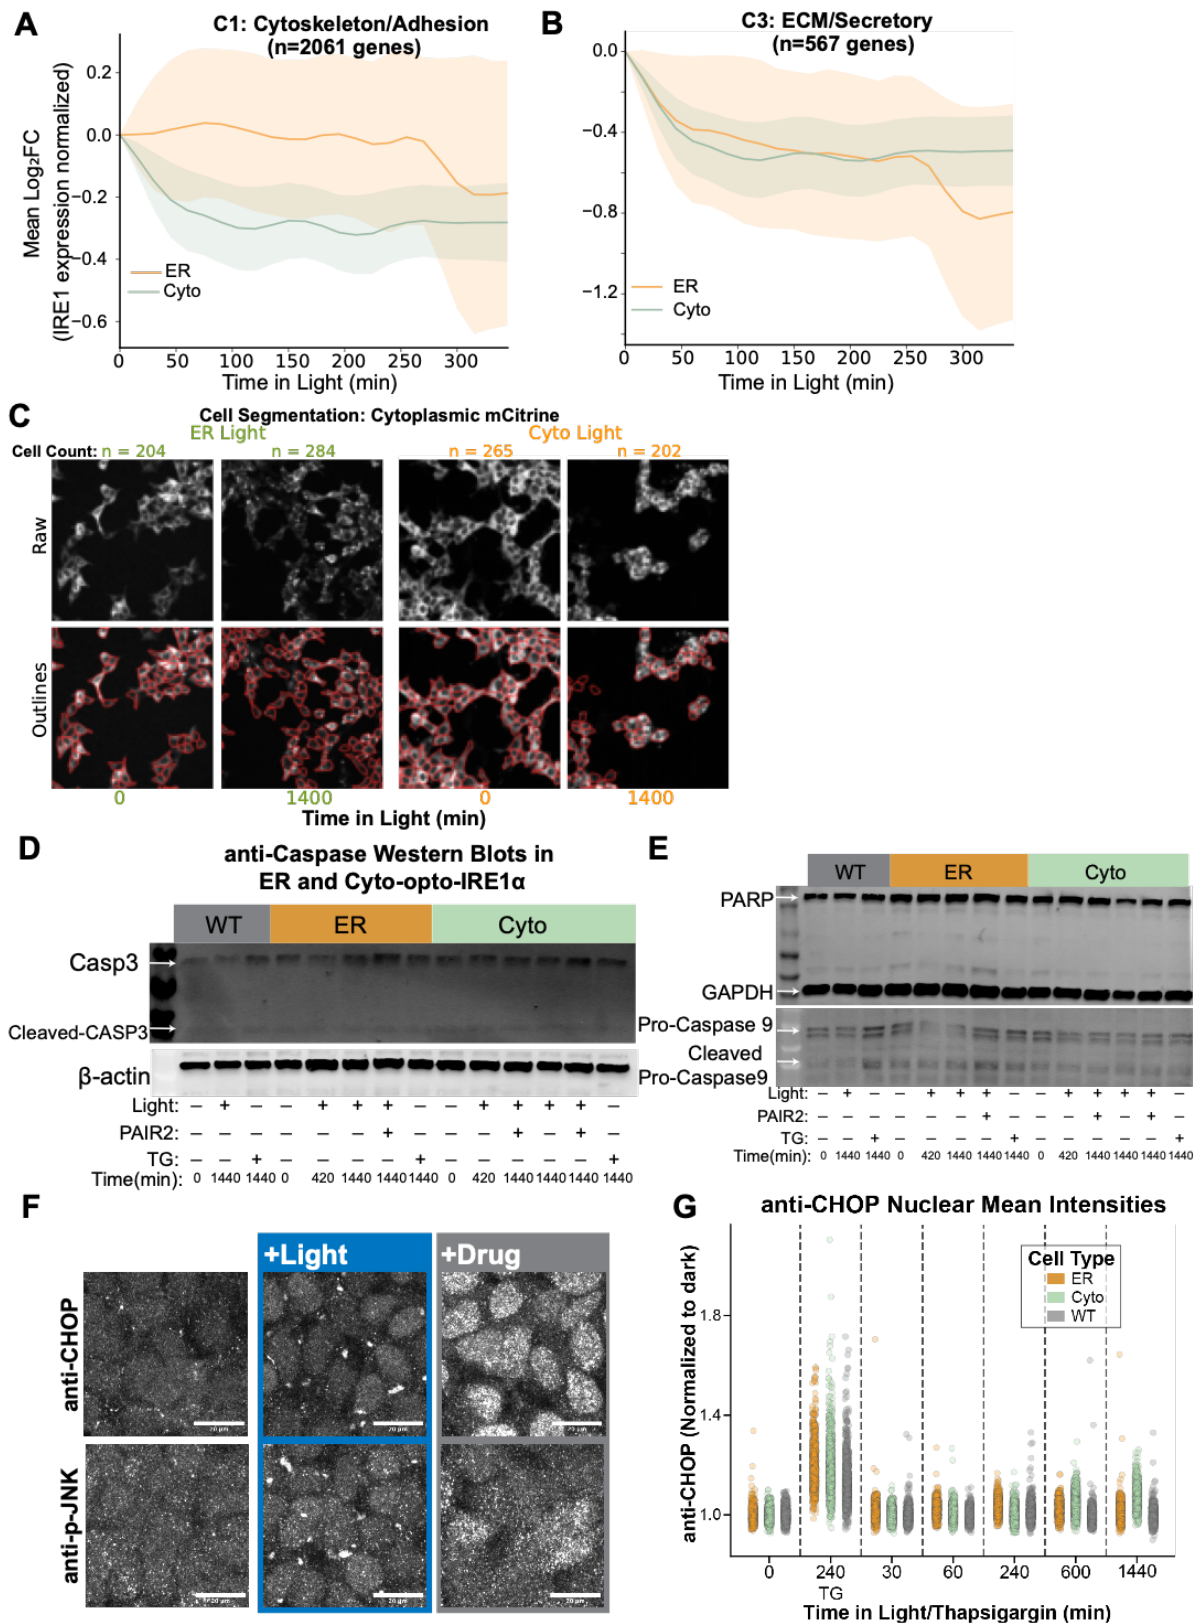

160 *Figure S5: (A, B) Mean log<sub>2</sub> fold change over illumination time for all genes in RNA-seq cluster C1*  
161 *(cytoskeletal/adhesion, selectively decayed by Cyto-opto-IRE1 $\alpha$ ; a) and cluster C3 (canonical RIDD targets; b),*  
162 *with values scaled to total-IRE1 $\alpha$  protein levels. After IRE1 $\alpha$  expression normalization, C1 decay remains selective*  
163 *to Cyto-opto-IRE1 $\alpha$ , whereas C3 decay is equivalent between constructs, confirming that the cytoskeletal decay*  
164 *program is topology-dependent rather than a dosage effect (C) Representative images of automated cell*  
165 *segmentation used for cell-count quantification in Fig. 3d, showing CellPose-derived masks for ER- and Cyto-opto-*  
166 *IRE1 $\alpha$  cells at indicated time points. (D, E) Western blots for cleaved caspase-3 and procaspase-3 (d) and PARP*  
167 *and caspase-9 (e) in WT, ER-, and Cyto-opto-IRE1 $\alpha$  HEK293T cells under dark conditions and after varying*  
168 *periods of illumination. No cleaved caspase-3, PARP cleavage, or caspase-9 activation is detected in illuminated*  
169 *cells.  $\beta$ -actin and GAPDH serve as loading controls, respectively. (F) Representative immunofluorescence images*  
170 *of HEK293T cells stained for anti-CHOP and anti-p-JNK after 240 min of illumination and after 240 min of 300 nM*  
171 *TG treatment. Neither ER- nor Cyto-opto-IRE1 $\alpha$  illumination induces CHOP or p-JNK above background, whereas*  
172 *TG robustly activates both. Scale bars, 20  $\mu$ m. (G) Quantification of nuclear anti-CHOP mean fluorescence*  
173 *intensity over illumination time in HEK293T cells, normalized to the mean of t = 0 min light. Data shown are mean*  
174  *$\pm$  s.e.m.; n  $\geq$  300 cells per time point.*

175  
176  
177  
178  
179  
180  
181  
182  
183  
184  
185  
186  
187  
188  
189  
190  
191  
192  
193  
194  
195  
196  
197  
198  
199  
200  
201  
202  
203  
204  
205  
206  
207

208 **Fig. S6: XBP1-es is generated exclusively by cytoplasmic IRE1 $\alpha$  and is detectable in human**  
 209 **cancers.**

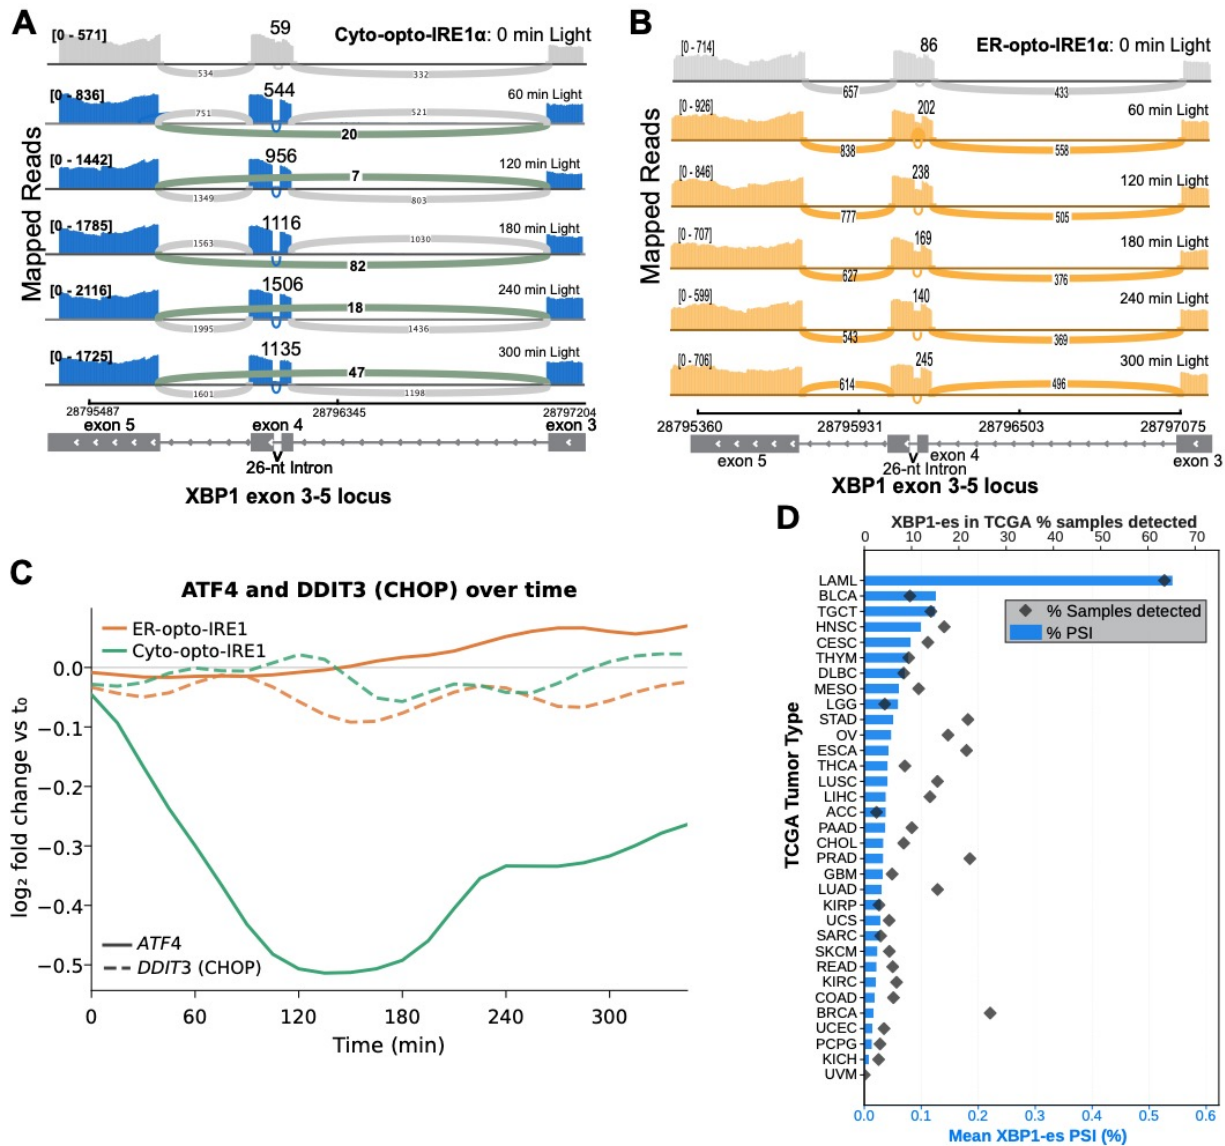

210 Figure S6: (A, B) IGV sashimi plots of the XBP1 locus at six illumination time points (0, 60, 120, 180, 240, and 300  
 211 min) for ER-opto-IRE1 $\alpha$  (b) and Cyto-opto-IRE1 $\alpha$  (a) cells, showing junctions between exons 3–4, 4–5, and 3–5.  
 212 Exon 3–5 junction reads (XBP1-es) are detectable in all illuminated Cyto-opto-IRE1 $\alpha$  samples and absent from all  
 213 ER-opto-IRE1 $\alpha$  time points. (C) Expression of ATF4 and DDIT3/CHOP mRNA over illumination time in ER- and  
 214 Cyto-opto-IRE1 $\alpha$  cells, normalized to t = 0 min. (D) XBP1-es junction reads (exon 3–exon 5) detected in TCGA  
 215 RNA-seq samples from 11,237 tumors via the Snaptron database (Snaptron TCGA v2 compilation, GRCh38).  
 216 Percent Spliced In (PSI) for XBP1-es is shown across all cancer types with  $\geq 5$  supporting reads. Top x-axis = %  
 217 samples detected, Bottom x-axis = % PSI in all tumors from a specific cancer.  
 218

219  
 220  
 221  
 222  
 223

224 **Fig. S7: XBP1-es retains broad UPR transcription factor activity but selectively fails to**  
 225 **induce integrated stress response genes.**

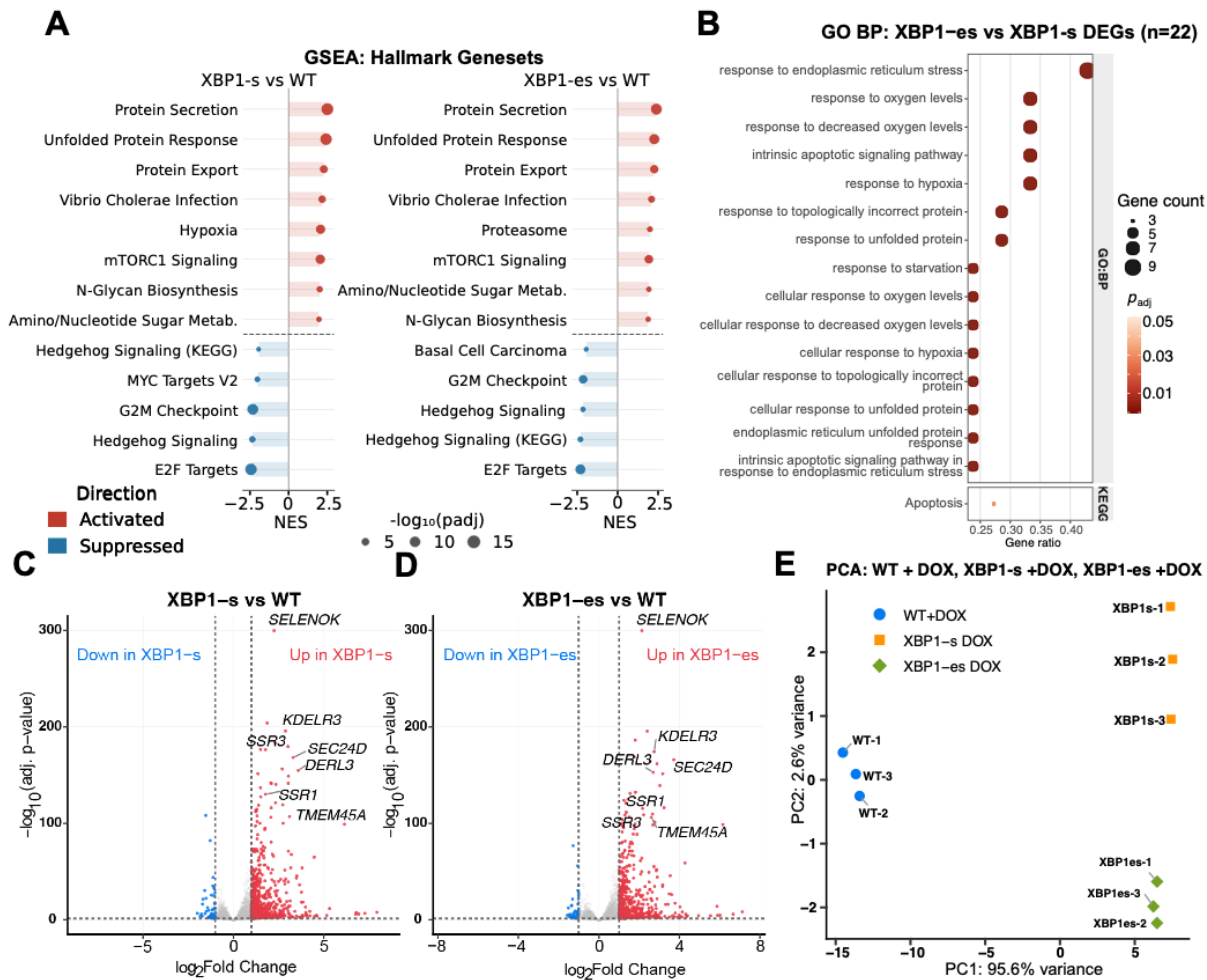

226  
 227  
 228 *Figure S7: (A) Gene Set Enrichment Analysis (GSEA) Hallmark pathway enrichment for doxycycline-induced*  
 229 *XBP1-s versus wild-type and XBP1-es versus wild-type HEK293T cells (24 h doxycycline treatment; n = 3*  
 230 *biological replicates per condition). The top four upregulated Hallmark terms are identical between XBP1-s and*  
 231 *XBP1-es, confirming broadly overlapping transcription factor activity. (B) Gene Ontology Biological Process*  
 232 *enrichment for the 22 genes differentially expressed between XBP1-s and XBP1-es (adjusted p < 0.05,*  
 233 *|log<sub>2</sub>FC| > 0.5), showing enrichment for integrated stress response and ATF4-target gene sets. (C, D) Volcano plots*  
 234 *of XBP1-s versus wild-type (c) and XBP1-es versus wild-type (d) comparisons. Differentially expressed genes are*  
 235 *highlighted; genes uniquely upregulated in XBP1-s (including ATF4 and DDIT3/CHOP) are annotated. Adjusted p-*  
 236 *values from DESeq2; dashed lines indicate |log<sub>2</sub>FC| = 1 and adjusted p = 0.05 thresholds. (E) Principal component*  
 237 *analysis (PCA) of all nine samples (n = 3 per condition: wild-type + doxycycline, XBP1-s + doxycycline, XBP1-es +*  
 238 *doxycycline). PC1 accounts for 95.6% of total variance and separates wild-type from both XBP1 isoform-expressing*  
 239 *samples; XBP1-s and XBP1-es samples are closely co-clustered, confirming the high similarity of their global*  
 240 *transcriptional programs.*
