# Supplementary material
Source: Research Square preprint supplement (doi:10.21203/rs.3.rs-9695931/v1)
Supplement: Supplementary file 1 [file bafd2f1f81cfee212ba3971f.xlsx]

## Sheet: README
Supplementary Data — IRE1α Topology Paper
This file contains four supplementary data tables. Raw count matrices represent gene-level read counts from time-series bulk RNA-seq of HEK293T cells expressing ER-opto-IRE1α or Cyto-opto-IRE1α, illuminated continuously for 0–345 min (15 min intervals). Timepoint columns are labeled in minutes post-illumination.
Sheet Name	Description
qPCR_Primers	qRT-PCR primer sequences used in this study
Antibodies	Primary and secondary antibodies used in this study
RawCounts_Cyto_opto	Raw gene counts — Cyto-opto-IRE1α time series (0–345 min, 15 min intervals, n=1 per timepoint). Columns C0–C345 denote minutes post-illumination.
RawCounts_ER_opto	Raw gene counts — ER-opto-IRE1α time series (0–345 min, 15 min intervals, n=1 per timepoint). Columns E0–E345 denote minutes post-illumination.

## Sheet: qPCR_Primers
Supplementary Table S1: qRT-PCR Primer Sequences
All primers used for qRT-PCR in this study. F = forward, R = reverse.
Gene_Symbol	Strand	Source	Primer_Sequence
JUN_F	F	Primerbank	TCCAAGTGCCGAAAAAGGAAG
JUN_R	R	Primerbank	CGAGTTCTGAGCTTTCAAGGT
RBM5_F	F	Primerbank	CCATCACAGAGAGCGATATTCG
RBM5_R	R	Primerbank	CGGCTTACACCTGTTTTCCTC
RBM22_F	F	Primerbank	ACCTCTCTGGGTTCCAACAC
RBM22_R	R	Primerbank	TGGCACAGATTTTGCATTCCT
BCAM_F	F	Manual Design	TCACACTCATCTGCTCTGCCCG
BCAM_R	R	Manual Design	TTGGAGGCTTCACAGGAGATGCC
BLOS1_F	F	Manual Design	CAAGGAGCTGCAGGAGAAGA
BLOS1_R	R	Manual Design	GCCTGGTTGAAGTTCTCCAC
CD59_F	F	Le Thomas et al., 2021
CD59_R	R	Le Thomas et al., 2021
b_actin_F	F	Primerbank	CATGTACGTTGCTATCCAGGC
b_actin_R	R	Primerbank	CTCCTTAATGTCACGCACGAT

## Sheet: Antibodies
Supplementary Table S2: Antibodies Used in This Study
WB = western blot; IF = immunofluorescence.
Antibody (Target)	Host Species/Target	Supplier	Catalog Number	Application	Dilution Used
XBP1-s	Rabbit	Cell Signaling Technology	#E9V3E	IF	1:400
XBP1-s	Rabbit	Cell Signaling Technology	#D2C1F	WB	1:1000
Phospho-IRE1α (Ser724)	Rabbit	Novus Biologicals	NB100-2323	WB, IF	WB: 1:500–1:1000; IF: 1:200–1:500
Total IRE1α	Rabbit	Cell Signaling Technology	#14C10	WB	1:1000
CHOP (DDIT3)	Mouse	Cell Signaling Technology	#2895	WB, IF	WB: 1:1000; IF: 1:400–1:1600
ATF4	Rabbit	Cell Signaling Technology	#11815	WB, IF	WB: 1:1000; IF: 1:100–1:400
β-actin	Mouse	Cell Signaling Technology	#8H10D10	WB	1:1000
GAPDH	Rabbit	Cell Signaling Technology	#14C10	WB	1:1000
Caspase-3	Rabbit	Cell Signaling Technology	#14220	WB	1:1000
Caspase 9	Rabbit	Cell Signaling Technology	#9508	WB	1:1000
PARP	Rabbit	Cell Signaling Technology	#5625	WB	1:1000
Secondary Antibodies
IRDye 680RD	Rabbit	Li-cor	926-68071	WB	1:5,000
IRDye 800CW	Mouse	Li-cor	926-32212	WB	1:5,000
anti-rabbit 633 IgG	rabbit	Invitrogen	Cat#A21070	IF	1: 800-1:1,1000
anti-mouse 555 IgG	Mouse	Invitrogen	Cat#A28180	IF	1: 800-1:1,1000

## Sheet: RawCounts_Cyto_opto
Supplementary Table S3: Raw Gene Counts — Cyto-opto-IRE1α
Raw read counts per gene from time-series bulk RNA-seq. HEK293T Cyto-opto-IRE1α cells were continuously illuminated (450 nm); samples collected every 15 min over 345 min. Column headers (C0–C345) indicate minutes post-illumination. Aligned to hg38 using RNA-STAR v2.7.11a; counts from featureCounts v2.0.8.
symbol	C0	C15	C30	C45	C60	C75	C90	C105	C120	C135	C150	C165	C180	C195	C210	C225	C240	C255	C270	C285	C300	C315	C330	C345
DDX11L1	0	0	0	0	0	0	0	0	0	2	6	1	0	0	0	0	0	0	0	0	0	0	0	0
WASH7P	396	411	289	350	406	412	347	312	361	329	268	358	331	333	410	539	428	364	416	406	352	388	329	376
MIR6859-1	17	15	12	39	16	26	28	29	28	13	17	19	33	27	18	26	49	26	26	20	12	49	27	26
MIR1302-2	0	0	0	0	0	0	0	0	0	0	0	0	0	0	0	0	0	0	0	0	0	0	0	0
FAM138A	0	0	0	0	0	0	0	0	0	0	0	0	0	0	0	0	0	0	0	0	0	0	0	0
OR4F5	0	0	0	0	0	0	0	0	0	0	0	0	0	0	0	0	0	0	0	0	0	0	0	0
LOC729737	8	4	23	13	0	10	10	5	19	8	9	3	4	15	13	9	8	11	11	12	16	11	0	17
DDX11L17	2	1	3	6	1	2	2	0	7	0	1	2	3	7	0	2	1	0	5	12	2	1	0	0
LOC102723897	309	358	311	497	318	508	452	329	449	398	407	494	481	319	495	582	487	466	487	389	358	476	424	424
MIR6859-2	0	0	1	6	0	0	2	7	4	0	0	2	0	5	13	0	12	4	0	0	0	0	2	2
OR4F29	0	0	0	0	0	0	0	0	0	0	0	0	0	0	0	0	0	1	0	0	0	0	0	0
LOC100132287	7	19	43	7	41	16	25	11	17	13	35	43	26	15	27	15	26	16	36	35	27	20	3	13
LOC105378947	0	2	0	4	0	0	0	3	7	0	4	0	0	0	0	0	0	0	0	0	0	7	2	0
LOC101928626	0	0	0	0	0	0	0	0	0	0	0	0	0	0	0	0	0	0	0	0	0	0	0	0
	34	62	43	64	99	34	49	51	71	34	41	18	68	114	56	68	81	60	77	74	89	74	55	66
OR4F16	0	0	0	0	0	0	0	0	0	0	0	0	0	0	0	0	0	0	0	0	0	0	0	2
	84	110	134	148	151	123	141	142	224	109	190	137	208	209	231	176	208	164	211	177	302	216	203	204
LOC100288069	67	41	51	42	68	59	104	64	74	114	70	58	98	68	158	62	52	54	113	72	104	78	96	92
FAM87B	6	5	0	8	0	0	4	4	15	0	0	0	1	4	8	18	0	12	4	2	0	0	1	24
LINC00115	25	28	36	50	32	28	14	30	24	39	38	28	35	50	45	56	18	29	32	28	50	30	16	43
LINC01128	805	571	388	333	395	350	381	345	499	310	298	481	451	439	547	470	556	419	544	396	579	493	447	553
FAM41C	0	0	6	0	0	2	0	0	6	0	0	6	0	0	0	0	4	0	0	0	4	2	0	0
LINC02593	620	520	453	580	604	641	473	494	649	446	566	446	517	421	573	677	451	493	501	437	559	537	367	420
SAMD11	3005	3070	2292	2993	3117	3484	2601	2756	2516	2538	2871	2840	3157	2643	2780	3253	2996	3002	2994	2515	2310	3149	2130	2377
NOC2L	12648	13587	7600	7943	8396	9084	6011	5842	6860	6345	6767	7079	7029	6336	6851	8285	8399	7860	8044	7197	7019	8675	6630	7527
KLHL17	1262	1124	1203	1375	1466	1824	1515	1468	1462	1208	1865	1398	1738	1304	1572	1718	1583	1151	1861	1330	1465	1536	1034	1407
PLEKHN1	2	3	6	6	29	2	3	2	10	10	24	31	13	8	0	2	12	6	24	5	1	0	4	10
PERM1	6	2	4	0	0	6	2	0	7	8	11	0	8	0	10	12	17	4	7	6	0	0	2	0
HES4	2565	2215	1757	2167	2237	3029	2272	1749	2267	1832	2733	2116	2191	1925	2405	2823	2195	2196	2740	1926	2107	2213	1635	2125
ISG15	66	136	92	101	149	149	98	188	221	148	117	142	126	168	51	247	120	102	176	126	127	127	86	103
AGRN	3787	3116	1922	2390	2226	2737	2078	1880	2324	1589	2767	2208	1982	1629	2077	1726	2160	1998	2133	1821	1844	1783	1404	1826
	5	10	7	8	26	14	4	14	4	9	0	5	20	12	1	13	12	14	11	8	21	11	14	3
LOC105378948	20	10	5	26	8	28	27	36	22	13	16	15	4	25	12	23	7	8	28	7	14	16	8	5
RNF223	0	0	0	0	0	0	0	0	0	0	0	0	0	4	0	0	0	0	0	0	0	0	0	0
C1orf159	1037	935	660	849	997	1006	805	977	881	622	852	786	900	884	1139	1114	1039	1005	863	1023	1000	1192	959	1036
LINC01342	1	0	0	0	0	0	0	0	0	0	0	0	0	0	0	0	0	0	0	0	0	0	0	0
MIR200B	0	0	0	0	0	0	0	0	0	0	0	0	0	0	0	0	0	0	0	0	0	0	0	0
MIR200A	0	0	0	0	0	0	0	0	0	0	0	0	0	0	0	0	0	0	0	0	0	0	0	0
MIR429	0	0	0	0	0	0	0	0	0	0	0	0	0	0	0	0	0	0	0	0	0	0	0	0
TTLL10	0	0	0	0	0	0	6	0	0	0	0	0	0	0	0	0	0	10	0	0	0	0	0	0
TNFRSF18	0	0	0	0	0	0	0	0	0	0	0	0	0	0	2	0	0	0	0	0	0	0	0	0
TNFRSF4	0	0	0	0	0	10	0	0	6	0	0	0	2	1	0	0	0	0	0	0	0	0	2	0
SDF4	4925	5641	4173	4345	5047	5274	3668	3646	3754	3117	3502	3919	4247	3826	3917	4629	5020	4831	4581	4231	4039	5300	4221	4841
B3GALT6	2064	2913	2314	2946	2940	3362	2874	2648	2933	3084	2913	3089	3651	3332	3643	4168	4192	3710	3881	3409	3378	4060	3038	3414
C1QTNF12	14	16	20	25	29	31	24	9	27	44	42	21	15	21	37	18	23	21	22	31	13	19	8	17
UBE2J2	2968	3880	2601	3447	3822	3842	3106	3037	3622	3247	3211	3320	4018	3625	4277	5130	4677	3990	4047	4090	4130	4720	3825	4434
SCNN1D	306	213	206	206	190	243	183	154	276	191	384	195	212	172	263	328	254	177	382	198	323	213	247	221
ACAP3	1768	1331	1123	1218	1374	1852	1458	1219	1555	1254	2202	1239	1331	957	1450	1567	1350	1345	1607	1225	1430	1290	990	1415
MIR6726	0	0	0	0	0	0	0	0	0	0	0	0	0	0	0	0	0	0	0	0	0	0	0	0
PUSL1	1314	1841	1421	1501	1854	2042	1645	1507	1609	1346	1343	1415	1845	1669	2050	2410	2148	1859	2107	1889	1782	2173	1594	1957
INTS11	2990	3401	2571	2873	3150	3348	2394	2490	3140	2621	2946	2788	3273	2667	3290	3420	3432	3216	3033	3229	3065	3417	2717	2818
MIR6727	0	8	0	0	1	0	0	0	0	0	0	0	1	0	0	0	0	0	0	0	0	0	0	0
CPTP	773	919	625	547	683	732	490	637	582	466	580	651	624	604	581	848	718	870	760	770	557	942	638	666
TAS1R3	74	28	44	40	43	36	43	40	49	54	77	29	47	32	37	40	52	39	84	17	20	57	18	50
DVL1	5192	4571	2399	2589	2816	3293	2139	2206	2388	2198	3128	2530	2480	2235	2478	3371	2957	3019	3165	2782	2625	3413	2216	3119
MIR6808	0	0	0	0	0	0	0	0	0	0	0	0	0	0	0	0	0	0	0	0	0	0	0	0
MXRA8	465	522	394	422	362	470	372	273	467	290	511	303	408	304	350	399	486	335	421	366	451	449	368	344
AURKAIP1	4874	5040	2349	2226	2150	2481	1322	1522	1524	1553	1760	1582	1936	1609	1853	2568	2056	2113	2075	1789	1965	2217	1820	1807
CCNL2	3455	2293	2450	3048	3179	3963	3870	3568	4114	2867	4498	3496	3775	3164	3912	4407	3702	3178	4192	3668	4107	3890	3383	4186
MRPL20-AS1	1153	1209	834	1049	1101	1319	1074	1044	1244	764	1027	1179	1227	1041	1258	1385	1167	1079	1147	928	1208	1158	1150	1047
MRPL20	3373	2977	1723	1788	1628	1642	1210	1502	1417	1317	1286	1145	1481	1437	1410	2349	1878	1598	1450	1877	1433	1789	1699	1665
ANKRD65	0	1	0	1	1	4	2	2	6	0	0	0	0	0	0	0	0	0	0	6	0	0	2	6
TMEM88B	0	0	0	0	0	0	2	0	0	0	0	0	0	0	0	0	0	0	0	0	0	0	0	0
LINC01770	20	44	6	31	12	24	32	3	27	20	9	1	25	16	13	8	8	21	16	12	18	6	0	3
VWA1	713	1033	742	797	820	859	648	662	603	537	587	591	810	634	579	893	936	870	878	741	826	940	716	993
ATAD3C	13	19	23	31	19	11	7	6	16	7	21	8	18	10	28	14	7	16	22	25	25	27	9	22
ATAD3B	3144	2943	2102	2163	2144	2493	1999	1909	2150	1782	2236	1957	2285	2208	2486	3686	2601	2216	2546	2241	2347	2847	2589	2331
ATAD3A	3721	4505	3048	3405	3653	3784	3073	2975	3360	3118	3267	2887	3286	3478	3679	4839	4091	3368	3733	3792	3464	4142	3152	3456
TMEM240	9	16	8	9	9	16	17	5	6	18	43	11	6	22	8	10	7	16	16	4	19	4	9	0
SSU72	5771	4511	1808	1970	1965	2378	1509	1448	1515	1484	1628	1783	1971	1883	1901	2722	2664	2298	1970	2106	2049	2635	2313	2586
FNDC10	644	684	402	421	461	505	295	344	275	238	276	239	302	285	292	358	410	410	398	350	274	414	288	395
MIB2	1441	1168	854	1105	1215	1371	1116	869	1076	895	1465	1171	1092	983	1188	1448	1342	1233	1415	1287	1160	1469	947	1225
MMP23B	31	1	6	8	6	19	14	9	4	2	40	8	0	11	13	14	17	5	15	0	4	4	10	1
CDK11B	2457	1889	831	1104	1248	1242	823	906	1126	932	968	1097	1122	1007	985	1418	1215	1273	1223	1123	980	1561	1245	1400
SLC35E2B	3174	3281	2008	2223	2285	2335	1809	1970	2212	1829	2037	2334	2181	2066	1974	2166	2450	2289	2401	2155	2112	2662	2184	2391
MMP23A	4	1	0	0	0	0	2	0	0	0	0	0	0	2	0	0	0	0	4	0	0	6	0	0
CDK11A	495	471	330	340	421	500	447	351	499	386	454	375	408	357	495	605	432	400	465	449	387	492	291	445
SLC35E2A	558	493	548	557	500	524	531	543	685	507	492	570	728	521	644	680	593	608	552	545	651	696	622	622
NADK	3420	3732	2231	2975	2826	3292	2452	2511	2815	2351	2743	2382	3154	2424	3087	3272	3324	2804	3260	2936	3253	3341	2795	2941
GNB1	16074	18903	10822	9711	9447	9267	6294	6533	6860	6821	6221	7137	7492	7044	6826	6925	9196	8477	7792	7383	7366	9737	7970	8408
GNB1-DT	23	11	16	22	23	23	19	32	11	40	11	8	29	19	34	2	45	22	27	32	20	35	15	9
CALML6	6	1	8	4	4	14	4	16	8	10	4	0	14	8	14	4	3	4	11	2	5	12	0	16
TMEM52	133	165	158	194	245	156	164	123	125	98	106	145	153	155	149	195	98	111	132	132	150	213	116	127
CFAP74	7	19	5	4	30	9	3	21	30	12	11	6	12	10	0	6	18	23	18	8	3	11	3	27
GABRD	85	104	53	34	49	60	75	41	66	14	53	62	64	52	105	92	29	24	83	34	80	80	91	92
PRKCZ	981	1107	609	878	999	893	743	818	857	632	591	774	993	806	768	934	1001	852	887	915	798	1055	807	1138
PRKCZ-AS1	48	78	60	97	74	73	70	56	106	50	85	42	94	97	74	159	71	53	77	110	75	131	65	84
FAAP20	1012	1316	875	927	925	1099	931	819	854	825	1066	628	1094	929	955	1264	1048	1004	1092	960	855	979	884	1100
	14	0	0	0	0	9	1	2	10	0	3	12	4	0	2	8	6	0	0	4	12	3	0	0
SKI	6697	5735	2566	3022	3381	3835	2572	2447	2995	2924	2980	3809	3523	3472	3415	2751	4723	4217	4118	3773	3875	4869	3927	3935
	0	4	2	6	12	6	7	0	0	0	0	22	12	10	19	10	6	2	12	8	6	22	8	12
MORN1	312	387	421	376	421	432	319	369	500	284	455	471	426	455	358	363	465	428	479	340	367	314	422	353
LOC100129534	76	57	61	50	23	73	41	100	23	110	42	64	56	30	54	38	67	34	58	36	107	50	33	31
RER1	3742	4791	3684	3974	4380	4489	3809	3762	4037	3575	3660	3846	4397	3842	4438	5431	4508	4385	4129	4588	4098	4633	3910	4553
PEX10	814	1002	783	838	716	809	645	584	728	603	625	684	815	660	931	837	1025	807	879	766	801	829	830	875
PLCH2	0	0	1	0	0	0	0	5	0	0	0	0	4	0	0	0	0	4	0	0	0	0	0	14
PANK4	0	0	0	0	0	0	0	0	0	0	0	0	0	0	0	0	0	0	0	0	0	0	0	0
HES5	0	0	0	0	0	0	0	0	0	0	0	1	0	0	0	0	0	0	0	0	0	0	0	0
TNFRSF14-AS1	0	0	0	0	0	0	0	0	0	0	0	0	0	0	0	0	0	0	0	0	0	0	0	0
TNFRSF14	0	0	0	0	0	0	0	0	0	0	0	0	0	0	0	0	0	0	0	0	0	0	0	0
LOC100996583	0	0	0	0	0	0	0	0	0	0	0	0	0	0	0	0	0	0	0	0	0	0	0	0
PRXL2B	0	0	0	0	0	0	0	0	0	0	0	0	0	0	0	0	0	0	0	0	0	0	0	0
MMEL1	0	0	0	0	0	0	1	0	0	0	0	0	0	0	0	0	0	0	0	0	0	0	0	0
TTC34	0	0	0	0	0	0	0	0	0	0	0	0	0	0	0	0	0	0	0	0	0	0	0	0
ACTRT2	0	0	0	0	0	0	0	0	0	0	0	0	0	0	0	0	0	0	0	0	0	0	0	0
PRDM16-DT	72	46	30	52	57	58	62	27	64	45	42	53	76	47	77	78	46	82	67	56	49	64	20	19
PRDM16	601	493	425	362	324	481	394	406	363	333	416	381	520	492	438	289	569	356	418	381	346	529	304	364
MIR4251	0	0	0	14	2	0	0	0	0	0	0	0	0	0	0	0	0	0	0	0	0	0	0	0
ARHGEF16	260	185	117	147	212	209	146	93	109	88	121	122	194	98	136	148	238	163	137	166	141	220	145	157
MEGF6	95	60	49	79	66	91	94	64	75	56	87	55	37	58	40	115	112	104	60	44	77	60	48	91
MIR551A	0	0	0	0	0	0	0	0	0	0	0	0	0	0	0	0	0	0	0	0	0	0	0	0
TPRG1L	1041	1091	569	864	836	974	602	859	963	1147	918	1004	1078	1063	923	1220	1241	1199	1151	1038	983	1223	1097	1078
WRAP73	1345	1257	625	568	726	813	585	651	596	727	655	863	706	656	885	1026	978	780	910	886	1055	1065	819	1069
TP73	594	678	268	364	301	358	280	227	302	335	259	300	344	314	297	404	465	375	414	319	301	344	223	315
GFOD3P	2084	2225	1433	1650	1357	1773	1588	1414	1580	1299	1480	1544	1620	1798	1481	1478	1755	1644	1901	1755	1751	2290	1649	2229
CCDC27	22	28	8	2	16	16	26	29	0	16	6	16	6	0	4	27	22	4	9	7	0	18	0	6
SMIM1	29	59	16	55	26	34	20	26	24	54	22	32	19	30	28	25	19	26	46	16	92	11	10	35
LRRC47	4368	5030	2591	2819	3038	3017	2306	2332	2486	2396	2316	2581	3122	2830	2881	3395	4097	2956	3482	3087	2902	3911	3346	3556
CEP104	2478	3309	2250	2499	2676	3039	2126	2478	2529	2389	2208	2440	2886	2498	2651	2608	3314	2820	3229	2696	2746	3079	2704	3007
DFFB	1139	1356	1034	1227	1377	1239	1183	1089	1055	965	1050	1145	1198	1217	1359	1383	1336	1236	1344	1113	1202	1424	1260	1317
C1orf174	1458	1528	1371	1360	1725	1815	1683	1745	1727	1579	1580	1631	2060	1957	1700	2457	2433	1900	2014	2034	1894	2202	1989	2304
LINC01134	31	20	32	16	8	46	13	51	6	9	0	31	37	20	14	25	22	13	40	26	10	15	7	18
LINC01346	0	0	0	0	0	0	0	0	0	0	0	0	0	0	0	0	0	0	0	0	0	0	0	0
LINC01777	0	0	0	0	0	0	0	0	0	0	0	0	0	0	0	0	0	0	0	0	0	0	0	0
AJAP1	0	0	0	0	0	0	0	0	0	0	0	0	1	0	0	0	0	0	0	0	0	0	0	0
	0	0	0	0	0	0	0	0	0	0	0	0	0	0	0	0	0	0	0	0	0	0	0	0
MIR4689	0	0	1	0	0	0	0	0	0	0	0	0	0	0	0	0	0	0	0	0	0	0	0	0
NPHP4	612	719	450	495	544	593	470	459	557	486	492	528	586	607	587	630	843	563	688	613	665	735	621	535
KCNAB2	233	296	244	195	120	195	160	101	169	142	154	124	165	140	176	153	175	195	141	146	126	125	177	102
CHD5	33	45	26	6	22	37	17	42	34	13	58	35	50	29	85	23	10	10	57	44	38	71	22	34
RPL22	8083	11512	8482	10237	10262	10276	9011	9656	10167	9141	9051	9503	9931	9025	9625	12294	10942	9277	9868	9730	9696	11856	10375	10209
RNF207-AS1	2	4	0	14	0	1	5	7	16	0	0	0	0	1	4	28	0	0	0	0	4	0	0	4
RNF207	297	148	148	214	241	184	179	225	258	142	317	255	177	194	249	197	158	188	233	150	273	295	101	230
ICMT	10979	12185	6061	6240	6256	6596	4555	4823	5057	4945	4357	5728	6028	5695	5715	5519	7299	6797	5983	6447	6199	6963	6165	6891
ICMT-DT	57	83	10	59	85	46	62	47	58	39	36	2	66	41	22	93	64	60	66	53	51	45	37	30
HES3	0	0	6	0	0	0	0	0	0	0	0	0	0	0	0	0	0	0	0	0	0	0	0	0
GPR153	511	501	328	297	342	330	279	237	199	168	245	277	240	205	295	367	297	255	312	317	276	382	281	321
ACOT7	3130	4053	2873	3342	3806	3603	2802	2806	2777	2671	2155	2562	2933	2594	2718	3601	3276	2914	2875	2666	2423	2968	2769	2489
HES2	10	6	19	2	4	2	6	12	24	2	4	4	24	9	4	8	0	1	14	0	10	10	16	0
ESPN	10	4	12	2	0	4	14	8	6	16	0	22	25	6	5	8	6	4	14	4	0	24	0	6
MIR4252	0	0	0	0	0	0	0	0	0	0	0	0	0	0	0	0	0	0	0	0	0	0	0	0
TNFRSF25	77	52	39	68	41	55	47	87	61	40	26	54	65	49	78	116	68	71	56	85	77	48	37	47
PLEKHG5	344	200	229	186	149	262	201	171	250	180	294	219	258	191	298	163	289	197	278	187	225	236	220	323
NOL9	3766	4433	3194	4159	4385	4370	3954	4300	3898	4013	3796	4164	4739	4779	4759	4827	5950	4888	4698	4941	4663	5580	4821	4435
TAS1R1	6	0	0	0	0	0	2	6	2	2	2	0	6	2	2	8	0	6	10	4	3	0	0	0
ZBTB48	785	903	706	900	874	1039	857	907	910	870	1022	980	1128	1029	1157	1386	1300	984	1275	1085	1236	1231	998	1137
KLHL21	2845	3656	2371	2908	3374	3828	3162	3189	3583	3134	3235	3310	4063	3602	3841	3530	4345	3629	3604	3728	3377	4404	3527	3467
PHF13	2125	2277	1435	1783	2122	2204	1805	1892	2038	1850	1868	1917	2168	2163	2275	2220	2212	2405	2104	2059	1988	2005	2124	2129
THAP3	604	702	367	494	459	545	466	383	513	435	329	438	636	516	487	732	567	615	660	467	563	657	609	544
DNAJC11	3489	2497	1480	1366	1477	1645	1224	1202	1456	1094	1199	1506	1364	1464	1525	1586	1822	1851	1661	1738	1758	1989	1576	1909
LINC01672	0	0	0	0	0	0	0	0	0	0	0	0	0	0	0	0	0	0	0	0	0	0	0	0
CAMTA1	1885	2094	1262	1250	1494	1329	1003	1010	1164	1016	983	1226	1251	1197	1304	1314	1363	1355	1160	1283	1131	1346	1381	1234
VAMP3	3498	4491	3435	4054	4263	4115	3484	3787	3583	3672	2950	3517	4251	4172	4089	4744	5176	3868	4291	4069	4063	5037	3693	4210
PER3	418	537	317	383	265	319	231	270	259	308	245	170	303	292	261	195	283	233	313	297	272	244	301	264
UTS2	0	0	0	0	0	12	0	0	0	0	0	0	0	0	4	2	0	0	0	0	0	0	0	12
TNFRSF9	0	2	2	0	0	2	2	10	0	0	0	6	6	0	0	4	4	2	0	2	10	0	4	0
PARK7	11228	14450	12093	14020	15331	15130	13080	13960	13374	12663	10878	12252	14278	14893	13962	18879	15576	14931	13291	14765	14100	15845	13890	14759
ERRFI1	1421	1835	1688	2132	2295	2347	2184	2335	2300	2348	1880	2434	2838	2607	2759	2395	2978	2724	2797	2694	2623	3149	2637	2695
LINC01714	0	0	0	0	0	0	0	0	0	0	0	0	0	0	0	0	0	0	0	0	0	0	0	0
SLC45A1	8	10	0	5	0	10	3	12	2	10	6	4	0	14	8	0	8	12	16	6	20	0	14	6
RERE	3498	4385	2551	2964	3570	3535	3115	2826	3220	2883	3083	3263	3499	3593	3470	2755	4450	3834	3540	3677	3688	4163	3452	3622
RERE-AS1	0	1	0	0	0	1	0	0	0	0	0	0	0	0	0	3	0	0	0	0	0	2	0	0
ENO1	110235	129281	76620	72664	74367	77302	51805	53198	56171	52660	51449	55210	60202	54578	53080	74490	70741	66950	61879	61815	59358	73121	60850	63178
MIR6728	0	0	0	0	10	2	0	1	0	0	0	0	0	0	0	2	0	0	0	0	1	0	0	1
ENO1-AS1	7	5	6	2	1	6	5	3	0	0	12	0	4	0	0	12	8	0	10	5	3	0	0	5
CA6	0	0	0	0	1	0	0	0	0	0	0	0	0	0	0	0	0	0	0	0	0	0	0	0
SLC2A7	0	5	6	0	3	4	7	4	8	0	0	0	8	0	10	4	0	2	3	1	0	0	1	0
SLC2A5	0	2	0	0	0	0	0	0	0	1	0	0	0	0	0	0	0	2	0	0	0	1	0	0
GPR157	384	443	395	345	426	457	357	339	299	393	369	323	412	361	331	257	387	385	383	331	365	482	274	325
MIR34A	0	0	0	0	0	0	0	0	0	0	0	0	0	0	0	0	0	4	0	0	0	0	0	0
H6PD	1359	1389	1050	1111	867	957	829	826	942	902	750	794	946	872	838	749	954	764	839	850	827	1008	665	854
SPSB1	258	422	190	333	393	417	301	404	308	352	247	289	375	359	301	380	425	433	302	367	441	428	332	410
LINC02606	26	30	4	30	12	27	56	26	34	2	20	54	39	23	25	24	54	40	42	23	76	13	33	16
SLC25A33	758	948	843	900	952	938	818	844	915	801	757	731	1050	1130	924	1115	883	1047	1019	1014	838	1164	887	1099
TMEM201	2973	3467	2308	2475	2952	2815	2392	2478	2576	2719	2537	2495	2997	3102	3262	3148	3682	3218	3284	3423	3030	3947	2943	3059
PIK3CD	332	297	195	195	236	214	197	244	139	200	198	169	209	150	184	235	231	223	269	222	277	263	204	253
PIK3CD-AS1	0	0	0	0	0	0	0	0	0	0	0	0	0	0	0	0	0	0	0	2	0	0	0	0
PIK3CD-AS2	192	182	181	235	227	228	153	168	270	230	191	98	177	161	155	203	163	184	142	146	152	175	160	190
CLSTN1	7653	9297	6451	7398	7756	7905	5847	5645	5907	5670	5290	6079	6748	6293	5729	6145	7999	7460	6698	6819	6221	7823	6529	7087
CTNNBIP1	809	1025	740	715	734	791	575	586	577	699	474	617	580	578	508	643	650	527	533	568	660	699	429	654
LZIC	1528	1808	1488	1645	2009	1970	1582	1694	1751	1687	1408	1851	1962	1804	1773	1572	2067	2118	1795	1902	1689	2294	2213	1873
NMNAT1	565	686	532	621	735	745	666	708	867	809	700	668	752	900	809	1099	970	959	858	953	799	939	910	806
MIR5697	0	0	0	0	0	4	0	0	0	0	0	0	0	0	0	0	0	0	0	0	0	0	0	0
	0	0	0	0	6	0	0	0	0	1	0	0	0	0	1	4	0	0	0	0	1	0	6	14
RBP7	46	42	20	36	91	56	40	42	47	94	48	55	102	57	44	96	18	44	46	92	66	88	33	73
UBE4B	5258	6381	4301	4689	4920	4830	3959	4066	4334	3884	3417	4390	4389	4181	3969	3412	5294	4837	4384	4147	4436	5440	4684	4799
KIF1B	6656	7627	5274	5577	6465	6213	5257	5570	6035	5580	4876	6180	6223	6071	5919	3841	7678	6742	6058	6478	6126	7508	6696	7032
	0	0	0	0	0	0	0	0	0	0	0	0	0	0	0	0	0	0	0	0	0	0	0	0
PGD	9479	12314	9597	11096	12021	11392	9350	10421	10852	10233	8578	9298	11080	10679	10434	12037	12117	11009	9560	10646	10385	11788	10258	10221
CENPS-CORT	0	0	0	0	0	0	0	0	0	0	0	0	0	0	0	0	0	0	0	0	0	0	0	0
CENPS	120	140	125	93	119	119	55	62	65	47	100	98	92	63	107	113	86	79	59	109	88	82	57	87
CORT	9	0	23	13	13	2	2	17	2	18	8	9	9	8	12	15	20	2	27	6	11	7	6	1
DFFA	5444	6934	5089	5741	6388	6373	4765	5210	5495	4899	4197	4649	5372	5762	5238	5572	7056	5936	5807	5796	5266	6799	5432	5609
PEX14	1167	1670	1137	1396	1566	1613	1290	1306	1352	1245	1350	1440	1615	1467	1660	2000	1991	1715	1502	1509	1545	1839	1453	1954
CASZ1	478	546	340	374	462	566	364	431	478	393	327	420	336	468	419	340	556	563	554	372	415	515	367	368
C1orf127	10	12	18	11	2	8	0	0	0	6	0	12	0	10	2	5	6	6	0	28	21	12	4	3
TARDBP	15142	18257	12669	13716	14353	14933	10978	11746	11736	11139	9656	11482	12399	11830	11462	12774	14979	13048	13583	13069	13351	15122	13395	13894
MASP2	86	92	120	141	96	81	81	86	91	77	77	74	104	132	76	97	159	51	60	118	117	77	83	124
SRM	10613	8435	3209	3617	3793	4502	2890	2693	3149	2916	3051	3059	3639	3470	3901	4852	4417	4341	4076	3873	3641	4512	3697	4095
EXOSC10	6294	7591	5218	5830	6205	6677	4948	5126	5595	4982	4738	5452	5902	5486	5596	5805	6794	6178	5603	5809	6144	6915	5476	5899
MTOR	9412	9653	5603	6222	6800	6070	4950	4607	5097	4806	4582	5622	5702	5395	5359	4617	6887	6464	6084	6036	6258	7120	5984	6255
MTOR-AS1	6	6	0	3	10	0	0	6	0	0	0	0	0	0	0	2	0	0	0	0	0	0	0	0
ANGPTL7	0	0	6	0	0	2	2	0	2	0	10	7	0	0	1	19	0	2	1	4	4	0	0	0
UBIAD1	2063	2557	1890	2194	2422	2503	2163	2565	2629	2648	2363	2500	3212	3249	3211	3460	3879	3564	3735	3773	3710	4206	3362	3548
DISP3	14	6	8	10	36	11	20	35	1	6	26	20	20	5	22	4	28	7	13	20	4	46	0	2
LINC01647	0	0	0	0	14	0	0	2	0	0	4	0	0	0	0	0	0	8	0	2	0	0	0	2
FBXO2	58	65	39	25	36	42	24	8	17	14	21	6	30	10	12	22	14	24	40	27	11	16	8	32
FBXO44	1143	1261	919	1404	1446	1554	1245	1362	1317	1167	1120	1045	1448	1376	1205	1813	1584	1515	1590	1397	1263	1577	1174	1365
FBXO6	58	113	121	93	94	94	126	117	105	121	83	47	157	79	108	122	68	96	147	98	92	158	130	109
MAD2L2	2708	3468	2083	2063	2254	2182	1496	1390	1641	1397	1567	1556	1678	1552	1641	2380	1931	1762	1701	1748	1388	1868	1599	1689
DRAXIN	14	17	8	28	12	2	1	2	14	2	12	0	11	8	1	10	0	4	8	28	9	0	10	0
AGTRAP	1689	1944	1208	1430	1388	1492	1150	951	1213	1292	1205	1344	1444	1136	1136	1654	1739	1339	1300	1438	1165	1352	1160	1139
C1orf167	16	22	22	6	19	20	31	0	18	18	20	38	14	8	15	24	14	13	12	32	2	0	26	11
C1orf167-AS1	4	4	1	0	2	1	8	2	2	4	2	10	8	6	3	0	0	6	0	0	0	0	0	0
MTHFR	1035	1151	805	976	927	950	756	851	917	692	823	950	1049	837	1054	940	1328	1020	926	913	958	1246	886	942
CLCN6	526	655	504	618	656	689	666	629	728	543	505	485	599	546	570	533	557	464	610	614	629	621	554	609
NPPA-AS1	10	0	15	13	16	9	17	19	28	2	3	4	15	23	8	10	0	6	8	14	4	4	13	0
NPPA	8	11	20	15	8	12	16	4	31	15	13	21	12	15	11	15	8	8	6	0	4	17	8	7
NPPB	0	0	0	0	0	1	0	0	0	0	0	0	0	0	0	0	0	0	0	0	0	0	0	0
RNU5E-1	0	0	0	0	0	0	0	0	0	0	0	0	0	1	0	0	0	1	0	0	0	0	0	2
KIAA2013	3259	4057	2008	2107	2152	2137	1774	1684	1709	1712	1757	2051	2013	1896	1960	2055	2635	2304	2272	2064	2366	2630	1944	2137
PLOD1	6091	7382	5213	5427	5704	5960	4201	3915	4288	3565	3394	3803	4319	3590	3800	4401	5056	5008	4254	4075	3890	5018	3940	4392
MFN2	9348	11132	7834	8857	9381	9712	8349	8139	9185	8220	7805	8402	10265	9591	9873	9980	12010	10710	10884	10693	10057	12258	10211	10946
MIIP	1285	1384	1193	1571	1618	2010	1723	1557	1689	1606	1598	1559	1952	1658	1906	2374	1986	1683	2170	1972	1740	1902	1603	1661
MIR6729	0	0	0	0	0	0	0	0	0	0	0	0	0	0	0	0	0	0	0	0	0	0	0	0
TNFRSF8	0	4	4	4	0	4	2	4	0	13	18	0	18	6	0	12	0	16	0	8	0	0	14	0
MIR7846	0	0	0	0	0	0	0	0	0	0	0	0	0	0	0	0	0	0	0	0	0	0	0	0
TNFRSF1B	10	6	0	10	10	2	4	0	4	0	2	0	4	2	0	0	0	0	2	6	12	4	10	8
MIR4632	0	0	0	0	0	0	0	0	0	0	0	0	0	0	0	0	0	0	0	0	0	0	0	0
VPS13D	2707	3228	2133	2336	2415	2319	1978	2170	2442	2319	1576	2159	2470	2729	2302	1436	3028	2468	2390	2452	2678	3097	2702	2722
SNORA59A	3	11	6	7	25	5	5	18	6	9	2	0	21	4	11	5	7	1	16	32	18	13	13	34
DHRS3	254	400	284	391	483	485	462	420	433	355	277	340	429	306	248	413	387	235	310	261	223	285	262	278
MIR6730	0	0	0	0	0	1	3	0	2	1	0	0	0	0	0	0	0	0	0	0	0	0	0	0
AADACL4	2	0	0	0	0	0	0	0	0	0	0	0	0	0	0	0	0	0	0	0	0	0	0	0
AADACL3	0	0	0	0	0	0	0	0	0	0	0	0	0	0	0	0	0	0	0	0	0	0	0	0
CFAP107	0	0	0	0	0	0	0	0	0	0	0	0	0	0	0	0	0	0	0	0	0	0	0	0
PRAMEF12	0	0	0	0	0	0	0	0	0	0	0	0	0	0	0	0	0	0	0	0	0	0	0	0
PRAMEF1	0	0	0	0	0	0	0	0	0	0	0	0	0	0	0	0	0	0	0	0	0	0	0	0
PRAMEF11	0	0	0	0	0	0	0	0	0	0	0	0	0	0	0	0	0	0	0	0	0	0	0	0
HNRNPCL1	69	146	126	116	136	138	72	68	90	78	112	63	70	127	103	135	83	141	68	133	126	129	97	113
PRAMEF2	0	0	0	0	0	0	0	0	0	0	0	0	0	0	0	0	0	0	0	0	0	0	0	0
PRAMEF4	0	0	0	0	0	0	0	0	0	0	0	0	0	0	0	0	0	0	0	0	0	0	0	0
PRAMEF10	0	0	0	0	0	0	0	0	0	0	0	0	0	0	0	0	0	0	0	0	0	0	0	0
PRAMEF7	0	0	0	0	0	0	0	0	0	0	0	0	0	0	0	0	0	0	0	0	0	0	0	0
PRAMEF6	0	0	0	0	0	0	0	0	0	0	0	0	0	0	0	0	0	0	0	0	0	0	0	0
PRAMEF22	0	0	0	0	0	0	0	0	0	0	0	0	0	0	0	0	0	0	0	0	0	0	0	0
PRAMEF28P	0	0	0	0	0	0	0	0	0	0	0	0	0	0	0	0	0	0	0	0	0	0	0	0
PRAMEF27	0	0	0	0	0	0	0	0	0	0	0	0	0	0	0	0	0	0	0	0	0	0	0	0
HNRNPCL3	6	1	4	1	7	5	3	1	6	4	8	5	2	4	11	6	0	2	5	5	1	6	3	4
PRAMEF25	0	0	0	0	0	0	0	0	0	0	0	0	0	0	0	0	0	0	0	0	0	0	0	0
PRAMEF34P	0	0	0	0	0	0	0	0	0	0	0	0	0	0	0	0	0	0	0	0	0	0	0	0
HNRNPCL2	15	21	27	20	32	25	15	14	17	16	31	10	24	31	14	37	27	26	13	36	41	33	32	21
PRAMEF36P	0	0	0	0	0	0	0	0	0	0	0	0	0	0	0	0	0	0	0	0	0	0	0	0
PRAMEF26	0	0	0	0	0	0	0	0	0	0	0	0	0	0	0	0	0	0	0	0	0	0	0	0
HNRNPCL4	4	22	12	14	14	13	13	6	9	3	7	7	4	13	9	12	7	12	10	6	11	13	3	12
PRAMEF9	0	0	0	0	0	0	0	0	0	0	0	0	0	0	0	0	0	0	0	0	0	0	0	0
PRAMEF13	0	0	0	0	0	0	0	0	0	0	0	0	0	0	0	0	0	0	0	0	0	0	0	0
PRAMEF18	0	0	0	0	0	0	0	0	0	0	0	0	0	0	0	0	0	0	0	0	0	0	0	0
PRAMEF5	0	0	0	0	0	0	0	0	0	0	0	0	0	0	0	0	0	0	0	0	0	0	0	0
PRAMEF8	0	0	0	0	0	0	0	0	0	0	0	0	0	0	0	0	0	0	0	0	0	0	0	0
PRAMEF33	0	0	0	0	0	0	0	0	0	0	0	0	0	0	0	0	0	0	0	0	0	0	0	0
PRAMEF15	0	0	0	0	0	0	0	0	0	0	0	0	0	0	0	0	0	0	0	0	0	0	0	0
PRAMEF14	0	0	0	0	0	0	0	0	0	0	0	0	0	0	0	0	0	0	0	0	0	0	0	0
PRAMEF19	2	0	0	0	4	0	0	0	0	0	0	0	0	0	0	0	0	0	0	0	0	0	0	0
PRAMEF17	0	0	0	0	0	0	0	0	0	0	0	0	0	0	0	0	0	0	0	0	0	0	0	0
PRAMEF20	0	0	0	0	0	0	0	0	0	0	0	0	0	0	0	0	0	0	0	0	0	0	0	0
LRRC38	0	0	0	0	0	2	0	4	0	8	0	0	0	4	0	0	0	4	0	0	0	0	0	0
PDPN	1824	2321	2197	2437	2765	2669	2401	2382	2518	2489	1997	2243	2690	2545	2674	2848	2846	2752	2573	2590	2548	3062	2474	2703
PRDM2	2360	2676	2145	2553	3041	3340	2805	3059	3588	3087	2623	3024	3549	3649	3251	2726	3866	3611	3584	3472	3405	4246	3791	3823
KAZN	1046	1316	1066	1260	1324	1273	1087	1101	1140	1115	890	1141	1389	1209	1288	1184	1423	1291	1173	1163	1217	1219	970	1182
TMEM51-AS1	2	0	12	2	0	5	3	3	1	0	0	0	0	0	0	5	4	0	0	1	6	0	0	0
TMEM51	393	441	378	440	421	527	474	420	507	453	420	531	504	435	399	527	516	479	412	590	285	489	357	473
TMEM51-AS2	0	0	0	2	0	0	0	0	2	0	0	0	0	0	0	6	0	0	0	0	3	0	6	0
FHAD1	29	29	29	40	61	21	25	23	45	28	18	8	34	36	31	29	15	30	21	21	11	11	32	20
FHAD1-AS1	22	9	14	11	6	15	3	19	2	4	3	23	17	14	13	12	13	15	0	0	16	0	0	0
EFHD2	3669	4397	2859	3010	3230	3326	2123	2410	2360	2220	1968	2016	2574	2362	2568	3102	3040	2931	2910	2472	2725	2825	2294	2599
CTRC	0	0	0	0	0	0	3	0	0	0	0	0	0	0	0	0	0	0	0	5	0	0	1	6
CELA2A	0	0	0	0	0	0	1	0	0	2	0	0	7	0	0	0	0	0	1	0	0	0	0	0
CELA2B	3	7	6	8	0	2	2	0	2	1	4	4	11	3	9	0	5	14	7	7	0	2	4	6
CASP9	775	986	756	948	891	896	746	765	761	783	750	701	1013	805	866	1024	787	732	720	971	872	882	565	737
DNAJC16	1110	1320	1138	1402	1522	1548	1442	1662	1558	1679	1137	1585	1895	1852	1631	1327	2033	1696	1972	1925	1540	1932	1655	1858
AGMAT	169	199	98	160	234	141	106	108	89	81	34	86	107	163	89	212	97	210	226	140	151	168	159	114
DDI2	1117	1244	1091	1249	1313	1066	934	1168	1094	1100	1135	1204	1542	1548	1252	453	1803	1595	1521	1627	1468	1789	1519	1499
RSC1A1	541	768	593	726	709	619	609	704	766	624	657	736	760	931	905	500	887	958	984	928	958	1179	843	946
PLEKHM2	2916	3623	2310	2941	3038	3278	2267	2258	2564	2191	2317	2279	2912	2639	2852	2944	3522	2962	3332	2899	3050	3532	2566	2853
SLC25A34	10	7	16	41	22	42	42	26	52	29	26	22	32	18	24	10	24	8	16	24	9	2	6	14
TMEM82	10	0	0	0	0	0	0	0	0	0	0	0	0	0	0	0	0	0	0	0	0	0	0	0
FBLIM1	542	528	235	268	330	295	253	232	217	221	188	239	278	249	195	310	344	364	298	298	284	293	208	373
UQCRHL	4519	5680	4239	5591	6090	5865	4501	5568	5326	5562	4338	4981	5808	5636	5593	7552	5985	5423	5471	5878	5687	6096	5744	6478
SPEN-AS1	600	660	563	675	822	833	866	740	769	593	597	607	772	666	694	760	633	734	795	665	657	737	635	596
SPEN	28001	26923	18976	22152	24959	25977	22801	22690	26549	21881	22204	25479	25131	25975	24252	14643	30811	28470	27053	26388	26173	32243	27539	29191
ZBTB17	727	824	558	746	909	982	691	675	1102	572	869	729	883	721	706	1095	982	1015	941	855	730	1091	735	1039
TBC1D3P6	0	0	2	0	0	0	0	0	0	0	0	0	0	0	0	0	0	0	0	0	0	0	0	0
SRARP	0	2	0	0	0	0	0	2	0	0	0	0	0	0	0	0	0	0	0	0	0	0	0	4
HSPB7	4	0	0	0	0	0	0	0	0	0	1	0	0	0	0	4	0	7	4	0	1	0	0	0
CLCNKA	0	0	0	0	4	4	12	0	0	0	0	1	2	0	8	3	0	0	0	0	0	0	0	10
CLCNKB	12	25	8	22	10	13	22	13	46	16	16	0	21	18	30	3	10	33	36	18	10	8	16	30
FAM131C	63	85	41	28	36	39	12	30	33	24	66	51	34	36	31	49	31	14	41	56	16	33	31	6
EPHA2	626	727	554	635	901	773	689	594	660	760	532	529	735	748	679	516	643	814	839	707	784	892	695	840
ARHGEF19	104	78	44	60	74	111	66	51	111	73	69	85	95	77	125	90	94	100	81	101	98	148	66	60
ANO7L1	3	13	12	8	16	12	2	13	6	16	2	16	7	0	0	4	4	7	9	14	0	2	0	1
CPLANE2	293	363	252	322	385	293	267	345	356	379	429	328	385	446	320	488	523	479	518	394	522	453	354	410
FBXO42	1646	1944	1596	1743	1998	2101	1931	2115	2571	1911	2006	2215	2683	2555	2233	2377	2707	2626	2444	2593	2473	2848	2390	2435
SZRD1	8897	9385	4667	4922	5324	6224	3975	4641	4479	4547	3895	5339	5104	4874	4779	5438	6269	6151	6119	5885	5398	6852	5912	6727
SPATA21	10	3	6	0	2	4	0	1	1	0	0	1	12	2	0	5	0	1	4	3	0	0	0	6
NECAP2	2061	2304	1948	2145	2291	2314	2008	2112	2142	1987	2083	2198	2495	2424	2477	2814	3077	2998	2609	2646	2360	3183	2728	2689
CROCCP3	93	70	91	132	129	186	119	136	241	112	225	148	135	178	166	130	167	140	99	138	177	123	121	131
RNU1-1	0	0	0	0	0	0	0	0	0	0	0	0	0	0	0	0	0	0	0	0	6	0	0	2
	0	0	0	4	0	0	8	0	0	1	0	0	2	0	4	1	0	0	3	10	0	0	0	5
	0	4	0	1	0	0	0	3	0	0	0	6	3	4	8	0	0	2	1	2	6	0	0	0
	1	11	5	19	10	9	23	15	18	6	14	13	10	0	2	7	5	5	3	2	22	4	0	9
	0	0	0	0	0	0	0	0	0	0	0	0	0	0	0	0	0	0	0	0	0	0	0	0
TRG-CCC1-1	0	0	0	0	0	0	0	0	0	0	0	0	0	0	0	0	0	0	0	0	0	0	0	0
NBPF1	610	744	590	620	696	742	479	560	454	532	543	464	617	526	576	345	707	536	612	604	659	643	466	612
CROCCP2	717	598	668	650	769	864	634	822	867	603	705	726	697	730	783	820	774	648	663	595	648	871	710	712
MST1P2	25	38	20	44	10	57	28	29	51	36	56	42	63	46	75	56	26	51	81	106	40	90	75	44
RNU1-3	0	0	0	0	0	0	0	0	0	0	0	0	0	0	0	0	0	0	0	0	0	0	0	0
	0	0	0	0	0	0	0	0	0	0	0	0	0	0	0	0	0	0	0	0	0	0	0	0
	0	0	0	0	0	0	0	0	0	0	0	0	0	0	0	0	0	0	0	0	0	0	0	0
ESPNP	0	0	0	0	2	0	1	0	6	0	6	0	2	0	5	0	0	0	0	2	0	0	0	0
TRG-CCC5-1	0	0	0	0	0	0	0	0	0	0	0	0	0	0	0	0	0	1	0	0	0	0	0	0
	0	0	0	0	0	0	0	0	0	0	0	0	0	0	0	0	0	0	0	2	0	0	0	0
RNU1-4	0	0	0	0	0	0	0	0	0	0	3	0	0	0	0	0	0	0	0	0	0	0	0	0
MST1L	4	9	0	4	2	10	14	4	0	18	0	10	8	1	12	18	23	12	4	20	15	4	0	0
MIR3675	0	0	0	0	0	0	0	0	0	0	0	0	0	0	0	0	0	0	0	0	0	0	0	0
TRG-CCC1-2	0	0	0	0	0	0	0	0	0	0	0	0	0	0	0	0	0	0	0	0	0	0	0	0
TRE-TTC3-1	1	0	0	0	0	0	0	2	0	0	0	0	0	12	0	6	0	0	0	4	3	0	6	0
TRN-GTT4-1	0	0	0	0	0	0	0	0	0	0	0	0	0	0	0	0	0	0	0	0	0	0	0	0
CROCC	604	422	270	347	360	471	416	351	544	337	401	462	366	265	342	433	460	403	489	333	290	376	261	419
RNU1-2	0	4	0	0	0	0	0	0	0	0	0	0	0	0	0	0	0	0	0	0	0	0	0	0
MFAP2	322	379	302	348	417	469	397	344	404	290	285	263	298	347	385	376	359	351	299	316	378	290	224	367
ATP13A2	3214	3899	2551	3054	3164	3031	2285	2243	2387	2277	2488	2080	2543	2571	2482	2544	3231	2809	2669	2630	2700	3131	2280	2701
SDHB	4720	6305	4902	5360	5928	5904	4796	4912	4686	4719	4002	4923	5279	5137	4628	5711	5898	5314	5359	5214	5111	5689	5215	5488
PADI2	88	158	44	57	68	42	56	39	45	62	53	34	76	49	73	57	70	42	50	80	34	29	116	75
PADI1	0	0	0	6	2	0	0	2	8	0	0	0	6	0	0	0	12	4	0	0	1	16	0	0
PADI3	2	0	2	16	0	4	8	0	0	0	0	4	0	2	0	10	0	8	10	0	6	0	0	0
MIR3972	0	0	0	0	0	0	0	0	0	0	0	0	0	0	0	0	0	0	0	0	0	0	0	0
PADI4	0	0	0	0	0	0	0	0	0	0	0	0	0	0	1	0	0	0	0	0	0	0	0	0
PADI6	0	0	0	0	0	0	0	0	0	0	0	0	0	0	0	0	0	0	0	2	0	0	0	0
RCC2	18899	22571	16638	17774	19400	19589	15500	15949	17424	16678	15075	17130	20119	18628	18506	18831	22497	21294	19770	19651	19592	22602	19854	20389
ARHGEF10L	285	323	215	208	145	192	157	138	172	229	148	237	278	220	233	219	174	269	182	221	171	261	236	256
ACTL8	70	34	48	45	53	54	28	34	29	40	18	32	16	34	60	48	86	54	55	22	26	27	41	46
LINC01654	0	0	0	0	0	0	0	0	0	0	0	0	0	0	0	0	0	0	0	0	0	0	0	0
IGSF21	8	6	3	8	11	6	16	11	14	13	0	4	0	10	28	26	8	0	9	6	6	6	6	2
KLHDC7A	2	0	0	0	0	0	0	0	0	0	6	0	0	0	4	0	0	0	0	0	0	0	0	0
PAX7	152	136	90	96	81	147	114	84	44	98	87	34	123	84	105	85	121	144	107	118	94	98	58	122
TAS1R2	0	0	0	0	0	0	0	0	0	0	0	0	0	0	0	0	0	0	0	0	0	0	0	0
ALDH4A1	986	1157	784	720	928	922	682	702	789	604	601	612	748	691	751	1024	872	664	811	713	760	814	606	737
MIR4695	0	0	0	0	0	0	0	0	0	0	0	0	0	0	0	0	0	0	0	0	0	0	0	0
MIR1290	0	0	0	0	0	0	0	0	0	0	0	0	0	0	7	0	2	0	0	0	0	0	0	0
IFFO2	1181	1268	732	889	798	1046	809	728	940	851	665	792	940	925	938	1031	1120	1166	1117	1059	1063	1128	984	954
UBR4	9529	9423	5170	5698	5862	5290	4498	4459	5592	4236	4097	5718	4801	4886	4516	3679	6518	5695	5579	5894	6060	7430	5986	7224
EMC1	5273	6521	4542	5401	5231	4997	3973	3987	4330	4038	3821	4206	5007	4679	4283	4214	5706	4785	5180	5231	4948	5670	4828	5320
MRTO4	5636	7480	5831	7133	8000	7823	6572	7713	7936	7436	6245	7370	8762	9264	9000	12817	10277	9396	9340	10518	9105	10927	9812	10456
AKR7L	17	16	30	38	19	29	16	34	42	59	27	20	20	8	37	44	36	27	36	30	30	50	17	31
AKR7A3	11	13	3	33	12	29	13	23	17	13	21	34	13	14	18	22	16	6	35	26	30	4	43	3
LOC100506730	181	207	123	142	128	164	77	146	210	123	106	174	126	127	189	121	154	127	133	210	144	261	168	220
AKR7A2	2422	2905	1805	1923	2122	2269	1589	1609	1875	1787	1484	1659	1737	1734	1806	2546	2289	1986	1912	1902	1831	2078	1844	1889
SLC66A1	747	983	667	731	801	938	656	841	772	650	646	717	881	858	930	1045	1085	984	1036	1013	978	1153	907	918
CAPZB	6310	7942	5779	6432	6735	6714	4914	4823	5278	4663	4004	4483	5056	4743	4525	6170	5798	5287	4823	4205	4150	5682	4458	4886
MICOS10-NBL1	0	0	0	0	0	0	0	0	0	0	0	0	0	0	0	0	0	0	0	0	0	0	0	0
MICOS10	2489	2979	2570	2904	3217	3107	2366	2736	2503	2491	1979	2309	2839	2605	2430	3769	3142	2803	2372	2742	2345	2718	2563	2732
RPS14P3	194	198	179	246	324	224	181	239	245	263	170	203	207	267	203	288	231	245	218	265	254	318	181	229
NBL1	12	15	5	21	9	10	6	17	13	9	18	3	7	8	1	3	10	20	6	27	8	1	1	9
HTR6	75	104	61	58	27	42	53	38	52	49	52	47	34	66	39	58	33	34	84	45	56	90	44	34
TMCO4	214	286	168	129	153	214	171	152	211	102	111	136	194	156	215	206	137	220	205	183	199	169	131	142
RNF186	0	0	0	0	0	0	0	0	0	0	1	0	0	0	0	0	0	0	0	0	0	0	0	0
OTUD3	1637	1624	1460	1815	1973	1989	1957	1899	2085	1855	1737	1831	2276	1884	2412	1759	1913	1901	2251	2216	2198	2740	2103	2067
PLA2G2E	0	0	0	0	0	0	0	0	0	0	0	0	0	0	0	0	0	0	0	0	0	0	0	0
PLA2G2A	0	0	0	0	0	0	0	0	0	0	0	0	0	0	0	0	0	0	0	0	0	0	0	0
PLA2G5	0	0	0	0	0	0	0	0	0	0	0	0	0	0	0	0	0	0	0	0	0	0	0	0
PLA2G2D	0	0	0	0	0	0	0	0	0	0	0	0	0	0	0	0	0	0	0	0	0	0	0	0
PLA2G2F	0	0	0	0	0	0	0	0	0	0	0	0	0	0	0	0	0	0	0	0	0	0	0	0
PLA2G2C	0	0	0	0	0	0	0	0	0	0	0	0	0	0	0	0	0	0	0	0	0	0	0	0
UBXN10	0	0	0	0	0	0	0	0	0	0	0	0	0	4	0	0	0	0	0	0	0	0	0	0
	0	0	0	0	0	0	0	0	0	0	0	0	0	0	0	0	0	0	0	0	0	0	0	0
VWA5B1	14	2	6	8	8	3	21	7	0	0	0	0	0	14	0	10	0	0	6	0	0	0	0	0
LINC01141	0	0	0	0	0	0	0	0	0	0	0	0	0	0	0	0	0	0	0	0	0	0	0	0
CAMK2N1	363	453	401	509	563	500	538	373	438	537	497	506	562	508	420	616	541	459	513	476	415	480	466	493
MUL1	1914	2067	1269	1466	1636	1971	1477	1661	1694	1809	1840	1832	2195	2185	2143	2595	2663	2497	2336	2225	2264	2928	2400	2368
FAM43B	79	48	37	44	66	42	60	45	87	108	54	91	72	76	42	60	118	92	106	63	71	67	102	101
CDA	32	26	34	28	38	48	28	28	50	20	8	21	29	37	18	18	23	18	56	30	18	40	14	6
PINK1	695	899	420	475	517	716	432	453	492	482	379	522	415	436	453	490	549	619	580	492	464	603	457	561
MIR6084	0	0	0	0	0	0	0	0	0	0	0	0	0	0	0	0	0	0	0	0	0	0	0	0
PINK1-AS	187	253	228	207	185	214	201	175	184	208	188	125	179	189	140	211	269	216	313	214	230	225	275	219
DDOST	10877	15556	12106	14576	15633	14703	12533	13298	13181	11623	10395	11566	13627	12885	13158	14985	14891	13874	13672	13827	13146	15321	13269	13406
KIF17	504	482	314	335	301	340	286	259	268	281	329	211	285	339	366	426	369	405	437	363	392	446	287	281
SH2D5	410	441	291	414	364	381	359	298	393	335	469	337	405	332	419	445	445	343	369	377	406	453	310	384
HP1BP3	4261	3790	3055	3597	3486	4076	3277	3431	3917	3050	4011	3632	3727	3050	3706	3020	3201	3107	3567	3274	3996	3745	3205	4070
EIF4G3	9999	9342	4373	4442	4569	4927	3862	3826	4256	3601	3774	4541	4348	3877	4588	3327	5414	5443	4626	4576	4629	6128	5095	5693
MIR1256	0	0	0	0	0	0	0	0	0	0	0	0	0	0	2	0	0	0	0	0	0	0	0	0
ECE1	3174	3110	1495	1485	1396	1582	1063	1268	1181	1106	1133	1514	1307	1196	1100	1334	1606	1661	1557	1521	1480	1704	1376	1781
ECE1-AS1	0	2	8	0	0	0	0	2	3	0	0	0	0	0	6	0	0	0	0	0	0	0	0	6
NBPF3	762	1138	827	843	822	941	821	768	831	829	581	854	730	739	732	626	968	748	819	824	756	941	712	857
ALPL	279	364	248	296	253	257	242	211	287	187	245	260	287	263	241	222	190	247	211	240	198	287	248	227
RAP1GAP	292	315	297	325	276	289	214	250	233	161	273	267	278	195	302	270	290	256	220	206	281	325	205	334
USP48	3968	5063	3763	4619	4568	4612	3719	4106	4280	3925	3390	3914	4226	4224	4093	4195	4539	4002	4107	4381	4073	5062	4312	4794
LDLRAD2	0	0	0	0	0	0	0	2	0	0	6	0	0	0	0	0	0	0	0	2	1	0	0	0
HSPG2	558	646	390	408	450	431	497	265	463	379	325	406	370	483	377	243	564	345	562	379	472	501	365	525
CELA3B	0	4	0	0	0	0	0	0	0	0	0	0	0	0	0	0	0	0	0	0	0	0	0	0
CELA3A	0	0	0	0	4	0	0	0	0	0	0	0	0	0	0	0	0	0	0	0	0	0	0	0
LINC01635	12	16	6	18	9	22	13	10	5	22	18	23	9	19	6	21	14	5	18	6	30	17	32	26
LINC00339	263	311	257	365	343	347	353	440	393	402	329	385	544	531	462	577	509	382	399	390	298	456	345	401
CDC42	9433	12821	9764	11700	12926	12821	10643	12182	11447	11425	9496	11052	13139	12867	11888	14506	14212	13523	13054	13234	12536	14983	13744	14170
WNT4	16	34	0	40	2	25	10	9	18	2	12	12	2	19	0	11	0	19	22	16	2	17	16	18
MIR4418	0	0	0	0	0	0	0	0	0	0	0	0	0	0	0	0	0	0	0	0	0	0	0	0
ZBTB40	2659	3059	2287	2673	3232	3557	2898	3102	3311	2994	2851	3406	3329	3019	3256	2304	3573	3612	2985	3055	3005	3701	3345	3800
EPHA8	594	753	421	422	567	490	326	361	383	292	390	353	346	387	433	449	644	387	489	416	418	500	452	412
MIR6127	0	0	0	0	0	0	0	0	0	0	0	0	0	0	0	0	0	0	0	0	0	0	0	0
C1QA	0	0	0	0	0	0	0	0	0	0	0	0	0	0	0	0	0	0	0	0	0	0	0	0
C1QC	0	0	0	0	0	0	0	0	0	0	0	0	0	0	0	0	0	0	0	0	0	0	0	0
C1QB	0	0	0	0	0	0	0	0	0	0	0	0	0	0	0	0	0	0	0	0	0	0	0	0
EPHB2	781	962	655	564	604	619	478	394	518	442	409	544	546	510	598	566	737	579	654	619	566	581	571	539
MIR4684	0	0	0	0	0	0	0	0	0	0	0	0	0	0	0	0	0	0	0	0	0	0	0	0
MIR4253	0	0	0	0	0	0	0	0	0	0	0	0	0	0	0	0	0	0	0	0	0	0	0	0
LACTBL1	0	0	0	0	0	0	0	0	0	0	0	0	0	0	0	0	0	0	0	0	0	0	0	18
TEX46	8	14	3	1	5	4	4	0	2	26	14	0	9	14	11	18	7	7	6	19	16	20	2	0
KDM1A	10630	12300	7295	7611	7381	8134	5736	6184	6313	6010	5612	7103	7343	6841	6773	7479	8223	7723	7591	7239	7346	9126	7768	8910
MIR3115	0	0	0	0	0	0	0	0	0	0	0	0	0	0	0	0	0	0	0	0	0	0	0	0
	0	0	0	0	0	0	0	0	0	0	0	0	0	0	0	0	0	0	0	0	0	9	0	0
LUZP1	3272	3955	2521	3116	3562	4007	3282	3570	3703	3579	3362	3774	4484	4018	3939	2686	5205	4326	4153	4054	3982	5084	4447	4065
HTR1D	22	26	26	29	58	63	22	32	41	44	28	50	30	39	70	14	64	79	27	45	16	29	28	30
LINC01355	92	56	50	98	67	84	117	84	72	90	134	114	65	110	105	160	109	56	75	84	82	88	66	63
HNRNPR	19532	23436	15467	15971	16649	15973	11814	12071	12863	11129	10337	12633	13003	12579	11863	12673	14918	14060	13302	13319	12820	15151	13808	13971
ZNF436	649	723	695	789	845	919	816	851	1040	832	857	883	911	1019	971	657	1034	943	896	929	830	1113	895	1008
ZNF436-AS1	76	61	68	106	106	102	76	71	61	84	70	41	78	65	24	62	111	70	90	92	81	69	102	45
TCEA3	6	1	6	5	20	4	5	0	24	13	0	16	20	14	18	24	9	6	6	16	4	6	4	0
ASAP3	534	320	210	233	244	301	207	195	264	272	260	260	246	286	328	363	300	381	348	251	269	352	235	301
E2F2	1222	1488	1233	1188	1319	1568	1471	1418	1704	1505	1426	1482	1708	1500	1659	1268	1648	1483	1627	1505	1397	1804	1337	1504
LOC101928163	0	2	0	0	0	4	0	2	0	0	0	0	4	0	2	0	0	0	2	0	7	0	0	0
ID3	3257	4595	4028	5052	6553	7299	6301	6512	6502	5678	4467	5071	5647	5180	4777	5687	5047	4720	4653	4213	3595	4618	3827	4018
MDS2	0	0	0	0	0	0	0	0	0	0	0	0	0	0	0	0	0	0	0	0	0	0	0	0
RPL11	28042	36151	30233	34668	37301	36099	29087	32305	30616	27835	25315	27784	34800	34359	31552	50735	34956	33231	30405	33031	31612	35499	31416	33247
ELOA	5520	5881	3693	4003	4479	4909	3627	3892	4547	4696	4020	4717	5056	4832	5524	4944	6212	5562	5189	5246	5487	6291	5676	5576
ELOA-AS1	39	18	7	23	29	31	27	31	18	45	30	51	35	45	23	47	18	56	34	29	42	32	47	23
PITHD1	2470	3305	3046	3484	3831	3924	3504	3829	3826	3717	3418	3689	4928	4488	4863	5893	5175	4905	4936	4920	4857	6087	4557	5084
LYPLA2	2049	2302	1505	1508	1671	1753	1182	1259	1274	943	1385	1142	1446	1300	1619	2007	1867	1754	1486	1312	1433	1812	1222	1332
GALE	1000	950	500	543	562	674	445	418	528	323	497	637	553	451	476	572	496	557	570	553	624	747	507	561
HMGCL	535	714	509	517	494	515	570	563	535	534	497	547	609	610	616	743	716	747	761	687	650	955	603	667
FUCA1	929	1370	912	1153	1166	1268	1044	1057	958	883	827	892	1151	1034	963	1223	1436	1204	991	1140	1264	1259	947	1141
CNR2	0	0	0	0	0	2	1	0	14	0	0	0	0	0	0	0	0	0	0	4	2	0	0	0
MIR378F	0	0	0	0	0	0	0	0	0	0	0	0	0	0	0	0	0	0	0	0	0	0	0	0
PNRC2	4678	5700	4545	5808	6216	6424	5803	6219	6394	5779	5105	6138	6838	6672	6887	6330	7444	6717	7091	6474	6558	7736	6851	7480
SRSF10	11554	13599	11297	13187	14998	13970	12614	13912	14459	13267	11943	14359	15390	15069	15315	14807	17823	16272	15685	16018	15625	18951	15678	17109
MYOM3	0	0	0	0	0	0	0	0	0	0	0	0	0	0	0	0	0	0	4	0	0	0	9	6
IL22RA1	0	0	0	0	0	0	0	0	0	0	0	0	0	0	0	0	0	3	0	0	0	0	0	0
IFNLR1	417	476	490	472	560	583	486	558	519	583	464	604	521	628	529	439	674	569	618	577	373	616	592	531
LINC02800	0	0	0	0	0	0	0	0	0	0	0	0	0	0	4	0	0	0	0	0	0	0	1	0
GRHL3	8	11	5	13	11	10	7	10	12	8	14	12	18	13	4	25	2	23	37	10	22	4	6	10
STPG1	566	707	500	659	607	758	591	695	766	673	721	693	812	859	744	783	1030	818	731	791	890	809	788	852
NIPAL3	2101	2392	1586	1983	2125	2187	1813	1888	1887	1748	1689	1847	2094	1981	2245	1844	2821	2261	2155	2239	2233	2486	2082	2611
RCAN3AS	0	0	0	0	2	2	2	2	0	0	0	0	4	0	8	0	0	0	0	0	0	0	0	0
RCAN3	1072	1133	503	543	663	512	527	427	500	387	345	437	511	499	541	297	546	521	545	542	464	596	506	488
NCMAP-DT	181	234	96	135	168	99	63	114	78	68	61	110	111	112	116	111	175	142	129	125	78	112	181	173
NCMAP	0	0	0	6	0	0	1	0	0	0	11	0	0	0	0	4	0	6	1	0	0	0	2	0
SRRM1	7626	10957	8562	10329	10414	10274	9255	9830	10694	9865	8416	9889	11059	11335	11234	9667	12942	11902	11623	11288	10992	12790	11904	12668
CLIC4	7730	9775	7565	8592	9334	8907	7805	7969	7549	7602	6750	8071	8005	7290	6983	5354	8373	7577	6798	6832	6549	8306	7658	7473
RUNX3	153	192	153	175	68	128	106	130	120	125	85	111	216	115	138	120	286	144	176	151	147	206	111	143
MIR6731	3	0	0	0	0	0	0	0	0	0	0	0	0	0	0	0	0	0	0	0	0	0	0	0
MIR4425	0	0	0	0	0	0	0	0	0	0	0	0	0	0	0	0	0	0	0	0	0	0	0	0
SYF2	1173	1453	1261	1428	1771	1665	1503	1504	1442	1533	1338	1569	1714	1838	1713	2280	1861	1803	1863	1952	1874	1967	1774	1994
RSRP1	1291	1175	1517	1521	2099	2380	1779	1816	1980	1764	2108	1988	1884	1722	1526	2156	1971	1725	1663	1355	1843	1733	1578	1786
RHD	0	0	0	0	0	0	0	0	0	0	0	0	0	0	0	0	0	2	0	0	0	0	0	0
TMEM50A	1557	2027	1520	1592	1825	1596	1197	1249	1060	1213	1063	1141	1421	1165	1203	1351	1543	1250	1299	1361	1167	1298	1412	1379
RHCE	4	2	2	11	13	0	4	12	0	3	12	8	8	4	8	16	16	4	20	22	7	34	11	16
MACO1	1610	1750	1511	1710	1999	1889	1460	2020	1537	1926	1505	1636	2320	2150	2114	2107	2322	2416	1939	2217	1970	2410	2227	2122
LDLRAP1	1474	1576	962	1033	1253	1369	1126	1273	1364	1157	929	1116	1372	1183	1396	1422	1368	1368	1347	1334	1487	1782	1082	1380
MAN1C1	197	207	104	66	96	118	105	46	117	81	95	164	156	92	78	77	54	112	118	66	104	146	106	134
SELENON	6485	7901	5572	5643	5811	5836	4205	4468	4091	3955	3516	4237	4549	4069	4269	3593	5258	4745	4709	4305	4250	5135	3761	4004
MTFR1L	1218	1517	1225	1407	1568	1666	1350	1201	1239	1137	890	1271	1419	1415	1356	1519	1779	1334	1402	1446	1304	1725	1368	1679
LOC646471	57	72	95	91	93	92	104	112	107	86	134	151	128	125	169	56	120	93	174	126	146	137	108	178
AUNIP	812	1204	940	1319	1399	1281	1381	1732	1703	1543	1242	1616	2068	1859	2128	2300	1997	1819	2081	2194	2038	2505	1957	2299
PAQR7	347	346	347	378	430	367	331	385	351	473	398	400	622	542	445	668	515	482	511	522	451	622	605	497
STMN1	9938	13337	11442	13288	14255	13774	12015	13139	13174	11876	10688	12144	14059	13700	13172	17009	15079	13178	13089	14235	13081	14681	13701	13868
MIR3917	0	0	0	0	0	0	0	0	0	0	0	0	0	0	0	0	0	0	0	0	0	0	0	0
PAFAH2	657	772	493	489	691	687	525	533	684	658	626	682	792	597	719	660	1035	801	682	815	662	931	859	688
EXTL1	69	41	38	72	17	51	47	41	52	25	32	22	34	40	64	59	32	48	89	62	44	37	45	54
SLC30A2	0	6	0	0	0	0	8	0	0	10	2	0	4	4	0	0	0	2	0	4	0	2	0	0
LOC105376910	0	3	0	0	0	0	0	0	0	0	0	0	0	0	0	0	0	0	0	0	0	0	0	0
TRIM63	0	1	0	0	0	0	0	0	10	0	0	0	0	0	0	0	0	2	0	0	0	0	0	0
PDIK1L	813	831	550	659	708	847	597	842	971	734	794	888	866	923	982	686	1013	777	884	865	781	1100	854	1132
FAM110D	0	12	7	3	7	6	7	12	24	0	4	3	9	9	20	29	1	20	2	6	2	17	8	5
	0	0	0	0	0	4	1	0	0	0	0	4	8	0	0	0	4	0	0	0	0	0	0	0
ZNF593	1527	1866	1535	1775	1870	1897	1600	1689	1776	1445	1472	1474	2059	1893	2143	2937	2193	2353	2177	2174	2017	2135	1638	1872
CNKSR1	59	85	75	98	122	118	130	58	132	93	116	107	105	112	154	132	155	73	139	113	118	112	141	81
CATSPER4	0	0	0	0	1	0	0	0	4	0	0	4	2	0	0	4	0	0	2	0	2	0	0	0
ZPLD2P	2	0	0	2	2	0	2	0	0	0	0	0	0	0	0	0	0	0	0	0	0	0	0	0
CEP85	2981	2093	1183	1193	1409	1533	1247	1243	1805	1583	1587	1797	1894	1728	1937	1679	2024	1943	1783	1696	1982	2359	1705	1953
SH3BGRL3	1171	1351	1189	1478	1516	1583	1063	1208	1122	875	964	739	1200	1069	1013	1381	1298	1096	1182	999	936	1316	875	943
UBXN11	735	585	469	728	550	756	550	593	647	424	725	522	617	576	551	792	561	398	641	495	546	686	494	592
CD52	0	0	1	0	1	1	0	0	0	0	0	0	0	0	0	0	0	0	0	4	0	0	0	0
CRYBG2	55	28	56	41	80	47	24	36	12	36	55	26	41	32	64	61	36	38	79	66	36	72	44	40
ZNF683	0	0	0	0	0	0	0	0	0	0	0	0	0	0	0	0	1	0	0	0	0	0	0	0
LIN28A	0	0	4	0	0	2	0	2	0	0	2	0	10	0	0	0	0	4	0	6	0	0	0	2
DHDDS	1217	1501	1066	1384	1378	1348	1362	1316	1764	1319	1328	1591	1729	1571	1788	1734	2182	1788	1810	1626	1770	2103	1893	1855
DHDDS-AS1	0	8	10	4	0	9	0	12	14	6	18	0	0	2	12	4	2	1	4	4	2	0	9	1
HMGN2	20623	28384	22459	26864	28609	27867	25329	28272	28747	27036	22959	25274	28965	26736	28683	36721	32202	27266	28066	28811	28533	31978	28177	28559
RPS6KA1	2214	2805	2010	2198	2156	2429	1680	1845	1951	1842	1498	1756	2041	2043	1970	2074	2350	2079	2242	2089	1798	2254	1993	1968
MIR1976	0	0	0	0	0	0	0	2	0	0	0	0	0	0	0	0	0	0	0	3	0	0	0	0
LOC101928728	92	62	41	82	87	53	85	92	40	59	109	38	75	79	106	58	42	99	83	59	86	54	54	72
ARID1A	8457	8666	5046	5945	6828	6489	5405	5662	6452	5729	5725	6810	6491	6473	6341	4691	8065	7400	6908	7326	6754	8404	7266	8051
PIGV	398	452	191	414	360	312	316	280	255	285	393	322	396	300	276	419	405	353	373	285	285	342	337	216
ZDHHC18	2157	2306	1097	1369	1500	1545	1225	1298	1275	1281	1311	1473	1423	1494	1409	1886	2075	1708	1641	1812	1680	1972	1796	1724
SFN	2	13	12	32	10	9	12	4	52	22	16	3	26	18	30	44	0	18	46	29	6	12	27	7
GPN2	1198	1262	732	832	1147	1087	885	955	1083	832	917	791	1089	1075	1198	1459	1401	1188	1331	1167	1278	1330	1047	1190
GPATCH3	724	845	550	687	697	747	518	738	794	735	674	774	758	770	905	1069	826	973	884	890	931	1043	761	788
NUDC	9484	12582	10023	11330	12736	12738	10371	11138	10339	10143	9388	10218	11875	11673	11001	16971	12811	12787	11330	12081	11603	13522	11162	11722
NR0B2	0	0	0	0	0	0	0	0	0	0	0	0	12	4	0	8	2	0	0	0	0	0	0	0
KDF1	0	20	2	25	24	6	8	5	19	4	0	0	14	10	8	0	4	12	4	8	0	2	0	2
TRNP1	516	665	368	496	568	625	453	351	385	326	319	357	426	314	453	440	504	535	445	429	443	532	416	407
TENT5B	60	38	32	38	96	52	69	42	80	52	58	103	61	94	114	86	117	132	60	87	76	87	130	37
SLC9A1	1343	1471	1038	996	1230	1148	1007	934	1051	1155	934	1050	1226	1212	1238	1198	1652	1490	1601	1332	1476	1709	1666	1432
WDTC1	2533	3087	1619	1800	1991	2217	1722	1640	1736	1689	1585	1753	1904	1769	1749	1440	2603	1988	1738	1933	1844	2044	1841	1855
TMEM222	1286	1438	1078	1278	1354	1382	1047	1036	1165	1089	851	1028	1272	1147	1173	1618	1497	1240	1379	1153	1379	1537	1451	1140
ACTG1P20	90	146	70	114	112	148	155	134	139	95	167	134	126	156	129	66	156	79	135	163	144	155	62	167
RNU6-48P	0	0	0	0	0	0	0	0	0	0	0	0	0	0	0	0	0	0	0	0	0	0	0	0
SYTL1	28	61	19	35	57	49	42	25	19	80	79	75	58	44	36	32	17	38	26	15	31	31	32	17
MAP3K6	658	518	398	370	422	454	421	374	505	310	407	329	395	372	427	340	417	359	518	386	565	440	339	436
FCN3	0	4	0	0	0	0	2	0	0	0	0	0	0	0	1	0	0	0	0	0	0	0	0	0
CD164L2	0	0	0	0	0	0	0	0	0	0	0	0	0	0	0	0	0	8	0	0	0	0	0	0
GPR3	14	20	18	6	20	24	4	6	28	7	40	21	34	6	24	26	56	4	34	22	24	7	30	14
WASF2	6507	7333	4481	5355	6212	6215	4459	4527	5152	5323	4742	5297	6140	5639	5582	4975	7237	6847	6218	6227	6409	7425	6460	6654
AHDC1	967	1195	965	1065	1383	1408	1315	1241	1390	1210	1067	1311	1359	1412	1119	1042	1698	1543	1241	1163	1165	1454	1091	1237
FGR	0	0	0	0	0	0	0	0	0	0	6	0	0	0	0	3	0	0	0	0	0	0	0	0
IFI6	189	242	301	317	342	301	258	193	235	180	226	201	290	232	263	331	192	232	156	211	234	184	217	275
FAM76A	670	887	711	844	770	930	926	884	886	903	781	860	1210	994	888	1084	1144	998	952	1053	899	1151	935	1160
STX12	2323	2796	2379	2629	3159	3015	2582	2784	3004	3114	2574	2827	3294	2994	3433	3270	3853	3759	3549	3604	3493	3899	3683	3891
PPP1R8	4401	5515	4549	5210	5827	5925	5226	5817	5821	5877	4928	6165	7120	7171	7093	7949	8155	7239	7488	7637	7672	8531	7901	8002
SCARNA1	4	8	0	7	3	7	1	0	3	2	6	3	1	12	0	0	2	0	12	2	3	24	0	0
THEMIS2	127	164	214	171	248	168	182	188	245	154	221	229	323	226	289	246	358	239	260	223	230	234	169	335
RPA2	4814	5947	4960	5527	6693	6817	5987	6663	7420	6452	5768	6605	8379	8471	7860	10313	9318	8586	8445	9232	8317	9979	8583	8816
SMPDL3B	410	547	468	455	471	528	497	448	410	444	416	518	487	442	387	525	472	575	364	407	426	496	391	486
XKR8	703	825	570	810	970	784	737	723	770	757	676	647	969	821	968	920	1014	868	907	748	894	1022	863	971
EYA3	3474	3884	3307	3703	4056	4008	3365	4227	4119	4105	3481	4492	4510	4023	4066	3460	5124	4716	4230	4086	4268	5177	4804	4581
PTAFR	83	48	61	41	38	70	62	64	44	24	56	46	87	70	61	46	154	57	108	72	77	58	21	47
DNAJC8	9503	13050	10250	11632	12790	12550	10355	11678	11506	11236	9527	10774	12568	11242	11346	15484	13338	12123	11716	12301	11391	12863	12670	12945
ATP5IF1	5210	6051	4988	5975	7004	6903	5604	5916	5886	5180	5226	4879	6631	6242	5736	8837	6800	6817	5926	5872	5657	6312	5361	5656
SESN2	3107	3665	2756	3469	3841	4278	3347	3610	3838	3169	3262	3335	3488	3424	3639	3364	4620	3793	3939	3967	3442	4297	3338	3693
MED18	957	1435	1253	1441	1935	1899	1827	2033	2421	2278	2005	2197	3013	2690	2656	3678	2912	2604	2608	2985	2628	3273	2877	2560
PHACTR4	3784	4349	3534	3965	4153	4493	4104	4285	4409	4045	3704	4579	4823	4609	4290	3846	5106	4605	4717	4642	4650	5111	4614	5267
RCC1	12051	16556	12833	14733	15821	16287	12813	13682	15286	14510	12774	13303	16116	15197	15795	16594	18183	16504	16666	16811	16521	18310	16153	16890
SNHG3	1200	1258	1350	1651	1712	1620	1334	1377	1622	1240	1160	1253	1283	1065	1123	1699	1138	1047	1185	967	1078	1078	1127	1145
SNORA73A	19	34	47	36	73	30	57	42	42	38	35	47	41	29	51	69	48	37	81	25	56	30	63	44
SNORA73B	17	24	9	33	38	6	26	26	9	8	11	39	18	41	19	20	18	19	31	16	41	26	35	15
TRNAU1AP	896	1473	1263	1356	1258	1344	1127	1367	1451	1479	1113	1101	1630	1404	1332	2168	1857	1481	1643	1570	1515	1711	1435	1803
SNHG12	336	326	251	422	303	382	296	267	384	190	270	294	311	217	322	320	360	278	343	328	287	348	230	360
SNORD99	10	13	7	8	11	1	19	6	23	18	3	8	4	12	15	16	39	17	17	10	5	30	12	16
SNORA61	73	57	60	78	37	75	68	52	68	63	61	72	62	55	69	70	69	43	93	57	70	57	45	91
SNORA44	9	3	5	8	2	5	5	27	15	29	4	7	6	4	7	14	7	8	16	9	9	8	0	25
SNORA16A	25	25	31	26	31	17	15	20	8	29	18	21	21	32	10	8	10	29	18	26	29	17	31	28
RAB42	6	9	6	2	0	10	2	5	9	4	0	12	0	4	0	0	0	8	12	5	10	2	0	15
TAF12	811	1091	982	962	1314	1104	1007	1280	1250	1173	892	1125	1438	1487	1383	1678	1485	1448	1349	1313	1262	1682	1265	1146
RNU11	5	0	0	0	3	2	4	0	8	0	3	0	0	0	0	0	0	10	2	1	0	5	0	7
GMEB1	903	795	513	610	596	781	662	648	812	682	610	788	1020	729	700	793	1173	817	781	908	863	880	771	832
	1	7	0	6	4	0	1	0	2	6	3	0	2	4	0	3	4	4	0	1	0	0	2	0
YTHDF2	6757	8245	5456	7090	8426	8604	7723	8796	9529	9908	8869	9287	11640	12168	11968	12615	14998	11894	12049	12238	11644	13436	11400	11760
OPRD1	48	22	17	22	40	42	26	34	41	13	16	74	28	17	34	14	39	28	8	33	10	40	21	32
EPB41	7746	8856	5454	4870	4995	5102	3712	3953	4087	3608	3449	4556	4490	3758	4276	2982	5331	4844	4449	4110	4013	5263	4532	5136
TMEM200B	10	18	6	20	34	43	17	11	18	9	12	11	22	11	28	26	12	2	22	30	4	40	0	15
SRSF4	7788	9978	8364	9770	10769	11212	9103	9803	10397	9678	8857	9203	10688	11241	10760	11868	12913	11748	11401	11772	11455	13812	11800	12595
MECR	830	856	462	533	541	583	448	404	415	424	515	426	508	603	619	702	818	481	550	596	564	575	609	541
PTPRU	4090	3598	1612	1727	1707	1960	1382	1281	1474	1322	1376	1267	1537	1408	1446	1474	1940	1615	1828	1644	1497	1829	1506	1819
LINC01756	0	0	0	0	0	0	2	0	0	0	0	0	0	0	0	0	0	0	0	0	0	0	0	0
LINC01648	0	0	0	0	0	0	0	0	0	0	0	0	0	0	0	0	0	0	0	0	0	0	0	0
MATN1	15	8	22	10	24	14	14	25	11	15	2	23	26	23	56	21	11	18	15	47	9	40	31	20
MATN1-AS1	8	12	4	12	15	17	13	29	41	21	38	13	18	29	34	17	36	18	22	35	49	21	22	32
LAPTM5	2	4	6	8	6	2	6	0	0	0	10	0	18	0	0	0	4	0	0	2	0	0	0	14
MIR4420	0	0	0	0	0	0	0	0	0	0	0	0	0	0	0	0	0	0	0	0	0	0	0	0
LOC400748	0	0	0	0	0	0	0	0	0	0	0	0	0	0	0	0	0	0	0	0	0	0	0	0
SDC3	2053	2074	1194	1389	1495	1332	972	1152	1085	1083	1278	1098	1362	1261	1331	1147	1670	1447	1486	1381	1263	1639	1490	1419
PUM1	7214	7938	5240	5678	6487	6871	6029	6073	6562	6339	5674	6687	7168	6996	7095	5548	8770	7485	7723	7491	7623	9325	7840	8470
SNORD103A	6	3	4	3	6	3	5	0	0	5	4	4	5	5	2	6	0	3	4	8	0	8	0	6
SNORD103B	4	5	7	2	2	7	1	2	12	14	10	3	0	6	7	4	19	4	23	15	25	20	2	12
SNORD103C	0	0	0	0	0	0	0	0	5	0	0	0	0	0	0	0	0	0	1	0	1	0	16	0
NKAIN1	214	177	107	139	105	75	71	110	78	108	145	121	165	109	101	107	107	163	136	100	97	89	71	68
SNRNP40	4746	6583	5127	6315	6654	6699	5735	6614	6774	6117	5529	6345	7388	7321	7147	9267	8469	7644	7857	8064	7200	8955	7822	8497
ZCCHC17	2650	3261	2553	2873	3284	3085	2340	2697	2695	2562	2230	2515	2868	2938	2840	3691	3386	3075	2884	3120	2997	3274	2923	3437
FABP3	39	32	33	50	31	34	19	23	20	31	21	35	21	21	38	18	15	4	56	40	18	47	32	25
SERINC2	552	664	534	606	560	625	458	481	461	412	360	440	371	387	410	477	448	527	478	414	557	396	440	379
LDC1P	0	0	0	0	0	0	0	0	0	0	0	0	0	0	0	0	0	0	0	0	0	0	0	0
LINC01226	0	0	0	0	0	0	0	0	0	0	0	0	0	0	0	0	0	0	0	0	0	0	0	0
TINAGL1	0	0	4	0	0	0	0	0	0	0	0	10	0	0	0	0	0	0	0	2	0	0	0	0
HCRTR1	10	1	4	22	2	0	4	4	0	9	6	1	9	6	3	6	10	2	2	0	4	19	0	0
PEF1	4707	5156	2608	2924	3273	3461	2519	2652	2646	2616	2286	2505	3285	2851	2787	3885	3842	3349	3464	3347	3332	4158	3273	3409
COL16A1	4	4	1	0	0	10	0	8	7	0	2	0	4	0	0	4	0	2	12	0	8	0	0	6
ADGRB2	1014	965	842	914	883	865	789	674	817	660	623	651	698	664	723	860	790	748	825	737	750	767	516	754
MIR4254	0	0	0	0	2	2	0	0	0	0	0	0	2	2	0	2	0	0	2	0	2	0	0	0
SPOCD1	27	16	20	38	8	19	26	7	14	24	32	22	7	16	25	28	9	26	16	22	38	29	20	20
PTP4A2	8966	8239	4200	3995	4411	4481	3161	3194	3208	3192	3018	4189	4060	3872	3617	4124	5264	4933	4443	4207	4264	5564	4474	5165
KHDRBS1	15787	20509	15293	17076	18667	17298	13829	15306	15353	14288	12464	13640	16153	15289	15062	16761	18885	16436	16032	15528	14329	16929	14585	15563
TMEM39B	1069	1224	1063	1195	1478	1557	1273	1196	1106	1178	1149	1280	1429	1399	1304	1828	1597	1436	1546	1485	1281	1534	1377	1534
MIR5585	0	0	0	0	0	0	0	1	0	0	0	0	0	1	0	0	0	0	0	0	0	0	0	0
KPNA6	5802	7053	5106	5470	6637	6748	5771	6019	6877	6533	6147	6919	7922	7581	7684	7025	9448	8157	8706	8246	7783	10194	8112	9513
TXLNA	6489	7167	4788	5551	6443	7500	6104	7066	7572	7433	6875	7682	9330	8501	9668	8345	9820	9116	9953	8476	9183	10384	8452	9301
CCDC28B	500	605	416	634	781	776	608	592	497	683	590	466	561	567	612	729	586	560	659	592	563	720	643	525
TMEM234	278	304	272	436	372	420	313	286	436	339	253	353	364	374	346	521	295	375	382	332	304	469	325	383
IQCC	390	564	552	631	754	821	833	793	1061	891	710	821	1163	1052	1136	1158	957	919	914	928	1221	1249	1057	946
DCDC2B	15	11	21	19	21	39	35	30	42	27	32	9	11	7	51	35	5	38	10	14	15	43	5	25
EIF3I	19025	26049	21243	25211	26905	27004	23763	24953	24717	22861	20207	22684	26563	27495	26226	33978	30742	27329	27302	28026	25787	30818	25672	26746
MTMR9LP	29	18	11	8	10	12	38	20	5	5	9	21	32	19	21	12	4	12	6	4	33	10	16	2
FAM167B	3	0	0	6	0	10	0	2	0	0	2	6	0	2	13	8	18	6	0	0	0	0	0	0
LCK	0	0	0	0	0	0	0	0	0	0	0	0	0	0	0	0	2	0	0	0	6	0	0	0
HDAC1	13783	17117	13788	16767	17654	17838	15698	16257	17647	15929	14365	15283	17324	16794	16664	18323	19103	17300	17422	17257	16301	19090	16229	17544
MARCKSL1	15061	20575	16935	20287	22147	22363	18352	18468	19292	17486	16394	16401	20486	19602	19587	23302	22487	20950	21420	20408	18602	21141	18061	19211
FAM229A	60	83	46	75	105	70	126	50	79	85	59	92	67	102	85	121	95	41	75	63	84	104	78	32
TSSK3	153	118	156	134	173	208	155	198	214	198	208	168	205	160	224	283	138	141	194	148	129	242	146	212
BSDC1	3376	3426	2044	2503	2773	3143	2544	2818	3067	2353	2875	3150	3306	3186	3072	3533	3532	3376	3604	3233	3414	3894	3612	3376
ZBTB8B	191	256	232	320	375	353	340	331	467	311	372	260	364	328	355	416	437	385	354	403	393	547	378	346
ZBTB8A	935	1316	1234	1262	1577	1598	1639	1967	2214	2025	1907	2004	2680	2501	2465	2577	2793	2693	2390	2734	2398	2607	2311	2595
ZBTB8OS	613	878	638	851	895	709	768	818	950	668	705	918	825	820	884	1019	840	798	841	848	719	949	920	907
RBBP4	9075	11263	9532	10856	11785	12277	10710	11493	11789	11716	9885	11586	13329	13314	12885	12251	15489	14043	13718	13399	12703	15840	13136	15336
SYNC	31	18	18	22	4	6	14	18	8	16	28	22	18	18	11	10	2	9	10	18	20	45	8	8
NHSL3	2428	2336	1041	1108	1106	1266	858	936	983	1002	1103	988	1026	1142	1235	1118	1567	1321	1120	1261	1092	1597	1224	1255
YARS1	13166	16814	11744	13897	14927	14694	11349	11947	11769	11227	10303	10578	12029	11342	10777	12658	13461	12134	11104	11031	11042	12463	11187	10751
S100PBP	1724	2153	1815	2101	2511	2583	2095	2497	2556	2703	2490	2792	3061	3070	3174	2793	3624	3036	2922	3113	2919	3557	3114	3307
FNDC5	64	83	51	68	49	75	24	74	50	57	53	50	38	34	87	23	74	34	58	58	50	133	50	23
HPCA	6	14	4	8	1	10	6	14	2	0	4	2	2	0	27	4	0	2	4	6	2	23	14	5
TMEM54	337	564	365	352	422	465	279	317	248	312	284	318	349	313	426	581	414	533	434	413	346	470	377	340
RNF19B	1168	1251	948	1084	1385	1218	1155	1185	1207	1172	1153	1354	1599	1505	1548	1558	1879	1602	1739	1650	1579	1602	1486	1739
AK2	11917	15161	12181	14690	15448	14586	12896	14327	13476	12988	11290	12644	15192	14670	14830	16715	17450	15500	15254	16092	15023	16736	15785	15595
AZIN2	157	131	104	41	107	80	99	61	112	22	72	89	55	65	65	91	154	115	86	89	112	105	103	95
TRIM62	576	754	471	600	619	822	576	657	547	492	565	542	810	674	636	643	714	638	684	712	638	829	705	760
ZNF362	982	1192	966	998	1001	1123	980	1107	1180	1019	954	933	1299	1271	1091	1192	1346	1113	1065	1078	1168	1236	996	1114
A3GALT2	3	0	0	0	0	0	0	9	5	0	0	0	1	2	1	0	0	4	0	1	1	0	0	2
PHC2	3019	3104	1776	1993	2089	2283	1666	2058	1819	1813	1734	2051	2223	2467	2221	2529	2756	2394	2440	2476	2237	2785	2189	2472
MIR3605	1	0	0	2	0	2	0	2	3	0	0	0	2	0	0	6	3	1	0	0	0	0	0	2
PHC2-AS1	12	8	18	3	33	13	7	12	11	13	31	16	22	7	0	7	34	19	9	6	11	16	23	2
ZSCAN20	683	631	517	682	953	793	724	781	862	769	795	873	708	886	778	547	880	756	894	784	798	953	830	987
CSMD2	2	0	4	1	0	0	1	2	0	0	1	2	0	2	0	15	0	2	0	0	0	0	0	0
HMGB4	0	0	0	0	0	0	0	0	0	0	0	0	0	0	0	0	0	0	0	0	0	0	0	0
CSMD2-AS1	0	0	0	0	0	0	0	0	0	0	0	0	0	0	0	0	0	0	0	0	0	0	0	0
C1orf94	0	0	0	0	0	0	0	0	0	0	0	0	0	0	0	0	0	0	0	0	0	0	0	0
MIR552	0	0	0	0	0	0	0	0	0	0	0	0	0	0	0	0	0	0	0	0	0	0	0	0
GJB5	1	0	0	0	4	0	0	0	0	0	2	0	0	0	0	0	0	0	0	0	4	2	0	0
GJB4	0	0	2	0	0	0	2	0	0	0	0	0	0	0	12	0	0	0	0	0	0	0	0	1
GJB3	2	0	0	0	4	0	0	2	0	0	0	0	4	0	6	0	0	0	0	0	0	0	0	0
GJA4	0	0	0	0	0	0	0	0	2	0	0	3	0	0	0	0	0	0	0	0	0	0	0	0
SMIM12	1978	2617	1833	2182	2675	2646	2004	2297	2428	2232	2113	2315	2968	2601	2622	3473	3159	3060	2791	3098	2775	3285	3166	3027
DLGAP3	59	29	8	20	14	36	34	13	18	6	37	19	47	43	40	14	6	18	61	18	18	43	28	14
GPR199P	22	20	30	21	4	8	42	17	23	32	10	18	22	26	39	2	19	6	47	14	24	63	13	28
TMEM35B	291	417	354	453	380	463	398	426	423	385	431	387	562	487	540	551	500	468	454	597	407	480	526	450
ZMYM6	1119	1051	659	849	908	861	787	767	891	801	834	918	1046	988	960	749	1076	924	953	968	1132	1249	1134	1347
ZMYM1	2191	2584	2066	2278	2792	2832	2566	3057	2806	2840	2531	2813	3218	3178	3480	2563	3791	3131	3770	3330	3307	3666	3202	3602
SFPQ	35869	47556	35847	41316	46849	45734	37776	40480	40351	38318	35713	37295	43654	44288	44060	46779	52692	47938	46316	46565	44098	51265	43968	45090
ZMYM4	7530	9216	6971	6949	7381	7696	6197	7052	7064	6945	5894	7071	7824	7784	7671	5550	9402	8298	7721	7813	7618	9551	7660	8473
KIAA0319L	3091	2336	1118	1296	1218	1357	1025	905	965	1037	1062	1282	1040	1127	1156	1292	1670	1278	1348	1326	1225	1805	1289	1572
NCDN	3852	3429	1664	2036	1914	2259	1731	1785	1936	1668	2079	2215	2103	1877	2000	1951	2642	2271	2331	2200	2402	2654	2450	2648
TFAP2E	13	9	8	34	25	14	20	19	38	29	20	19	24	21	28	18	21	19	34	18	6	19	43	25
PSMB2	9961	13062	11444	13273	14224	14090	11967	13045	13483	12161	11366	11620	13937	13906	13013	16996	15479	14564	14010	14687	13802	15495	13080	13947
C1orf216	676	549	346	457	427	419	331	407	398	378	426	370	403	450	372	567	441	370	439	421	436	528	429	417
CLSPN	5655	6332	4639	4787	5479	5783	5080	5489	5224	5289	4843	5939	6374	6202	5137	4466	7210	6304	6120	6197	6204	6682	5767	6797
AGO4	818	936	762	833	783	877	721	682	892	710	775	660	762	751	839	569	897	703	794	854	741	1000	713	872
AGO1	3094	3553	2655	2889	2816	2866	2609	2472	3048	2465	2416	2597	3172	3003	2619	1839	3287	3451	2971	3454	3046	3630	3030	3299
AGO3	1742	2501	1632	1828	2064	2127	2031	1973	2344	1904	1791	2078	2174	2024	2113	2074	2482	2403	2240	2320	2342	2579	2383	2650
TEKT2	10	26	22	21	25	31	28	42	48	14	9	22	30	20	30	20	20	10	13	51	21	20	6	41
ADPRS	1505	1626	1032	1264	1507	1729	1510	1548	1500	1794	1448	1478	2031	1951	2206	2256	2381	2172	2109	1905	1811	2464	2150	2121
COL8A2	0	0	8	11	0	0	6	0	0	2	0	0	0	0	7	13	0	7	0	1	0	0	0	0
TRAPPC3	2431	2456	1363	1322	1383	1415	1142	1240	1285	1215	1087	1342	1335	1368	1394	2204	1807	1565	1795	1688	1625	2091	1624	1853
MAP7D1	5051	6269	4381	5413	5575	6126	4579	4409	5107	4547	4496	4684	5668	5140	5629	5996	6427	5837	5971	6017	6041	6613	5108	5684
THRAP3	10593	13090	10375	12413	13102	13278	11452	12538	12077	11528	10063	11518	14011	14409	13444	12648	16116	14863	14371	15952	15547	17408	15851	16530
SH3D21	106	93	81	92	89	115	98	93	67	124	83	89	113	99	81	83	94	113	132	116	98	156	148	154
EVA1B	165	238	156	186	175	190	128	89	178	144	188	122	142	173	166	228	228	192	200	175	159	221	167	179
STK40	3503	3577	2091	2255	2431	2930	1970	2028	2283	2076	2184	2233	2447	2245	2094	2236	3043	2677	2515	2306	2431	2673	2329	2500
LSM10	1881	2504	2209	2573	2627	2561	2090	2079	2095	2169	1814	2026	2719	2273	2340	3219	2911	2563	2752	2686	2426	2602	2447	2608
OSCP1	163	210	261	144	198	163	165	129	180	196	201	174	209	201	141	308	207	150	165	136	178	172	133	124
MRPS15	4008	4996	4103	4729	4879	5012	4098	4425	4617	4426	3644	3716	4962	4508	4533	5993	4760	4351	4434	5083	4533	4976	4447	4513
CSF3R	0	0	0	0	0	0	0	0	0	0	0	0	0	0	0	8	0	0	0	0	0	0	0	0
GRIK3	7	9	0	4	0	2	2	10	0	0	0	0	0	4	0	4	8	4	0	24	12	14	2	6
MIR4255	0	0	0	0	0	0	0	0	0	0	0	0	0	0	0	0	0	0	0	0	0	0	0	0
LITATS1	28	28	38	23	6	12	26	16	25	30	44	16	16	15	28	22	51	8	20	34	32	0	26	18
ZC3H12A	177	198	156	318	268	319	277	349	313	243	227	260	318	257	249	221	251	231	279	226	320	346	185	261
MIR6732	0	0	0	0	0	0	0	0	2	0	4	0	0	1	0	0	0	0	0	1	0	0	0	0
MEAF6	2880	3323	2894	3277	3388	3395	2919	2982	3107	2777	2690	2901	3606	3010	3171	3716	3617	3233	3351	3161	2963	4078	3157	3274
MIR5581	8	7	0	18	10	5	15	11	8	15	15	8	5	10	11	8	16	12	9	13	6	2	3	20
SNIP1	1053	1428	1140	1528	1740	1938	1776	2201	2288	2311	1787	2032	2354	2441	2357	2547	3007	2499	2470	2859	2453	2994	2671	2936
DNALI1	2	1	8	10	2	12	16	20	10	0	14	0	3	8	0	3	10	2	8	11	6	8	10	12
GNL2	4531	6104	5466	6002	6425	6465	5834	6487	7141	6363	5774	6307	8198	8498	8229	9595	9251	8591	9258	9508	9375	10253	8990	9718
RSPO1	4	0	0	2	0	0	10	4	0	0	0	1	8	0	0	10	0	0	4	5	0	2	1	6
AIRIM	2804	3341	2607	3150	3504	3992	3572	3794	4438	4055	3379	3976	5151	4812	4802	4476	4984	4934	5008	4878	4962	5366	4569	5227
CDCA8	4267	5111	3101	3451	4259	3872	3284	3658	4019	3529	3427	3798	4356	3978	3854	4361	4714	4478	4250	4732	4284	5120	4404	4906
EPHA10	91	47	57	52	56	80	86	40	81	107	53	38	104	75	94	111	122	45	101	101	62	76	74	73
MANEAL	2438	2248	1460	1446	1545	1538	1090	980	1402	1360	1231	1192	1477	1450	1472	1463	1835	1816	1889	1557	1698	1730	1635	1510
YRDC	1734	2269	1969	2358	2775	2617	2676	3224	3679	2936	2622	2937	3658	3631	3451	3520	3527	3130	3428	3723	3537	4100	3271	3272
C1orf122	1368	1551	1071	1195	1195	1249	815	840	840	775	897	902	1001	898	935	1465	1214	1227	1394	1116	1008	1078	817	1102
MTF1	1086	1406	1111	1331	1685	1657	1624	1653	1767	1720	1374	1805	1876	1759	1931	1407	2050	1952	1900	2093	1880	2241	2082	2314
INPP5B	1026	1178	1066	1132	1243	1054	955	1199	987	953	859	879	1027	940	892	1216	1125	1095	967	923	885	1039	935	1046
SF3A3	9257	10564	7327	7600	8518	8621	6883	8008	7949	7601	7192	7240	8872	9108	8966	10685	10203	9433	9221	9629	9460	10280	9700	10036
FHL3	573	694	552	623	734	750	677	695	745	736	644	572	730	752	717	791	1050	739	847	789	852	947	754	738
UTP11	3084	3961	3386	3538	4270	4064	3365	4202	4009	3546	3608	4043	4580	4747	4461	5979	5057	4839	4540	4991	4588	5567	4766	5083
POU3F1	108	86	123	102	84	132	128	109	132	140	97	117	126	88	87	67	68	96	98	161	73	124	112	126
MIR3659	0	0	0	0	0	0	0	0	0	0	0	0	0	0	0	0	0	0	0	0	0	0	0	0
LINC01343	0	0	0	0	0	2	0	0	0	0	0	0	0	0	0	0	0	4	0	0	1	0	0	0
RRAGC	1458	2235	1461	1843	2016	1954	1764	1910	1902	1992	1752	2161	2341	2307	2359	2458	2762	2561	2252	2550	2306	2982	2591	2512
GJA9-MYCBP	0	0	4	2	6	1	0	0	0	6	0	0	4	0	8	0	0	6	0	0	2	4	6	0
MYCBP	0	2	8	10	3	1	0	3	1	0	0	3	2	2	0	1	0	1	7	3	4	6	3	0
GJA9	0	0	0	0	0	0	0	0	0	0	0	0	0	0	0	0	0	0	0	0	0	0	0	0
RHBDL2	4	10	6	11	16	6	4	2	0	0	6	16	5	3	10	3	1	1	10	3	0	0	2	1
AKIRIN1	6276	8171	6649	7817	8398	8234	6786	7223	7855	7449	6555	7147	9284	8719	8952	9126	10199	9063	9543	9646	9227	9911	9321	10355
NDUFS5	6613	9298	7889	9255	10306	10167	8021	9057	8831	8439	7076	8179	9807	9658	9394	15047	10461	10647	10035	9934	9564	10608	9772	9802
MACF1	8696	8774	4727	5060	5451	4948	4363	4407	5050	3967	3726	5305	4806	5117	4878	3183	5868	5704	4976	5584	5316	6717	5553	6038
	1464	1435	754	842	932	985	769	734	1039	786	755	1117	919	995	877	250	1131	1231	994	882	1235	1273	960	1066
	0	0	0	0	0	0	0	0	0	0	0	0	0	0	0	0	0	0	0	0	14	0	0	0
BMP8A	137	102	124	129	86	180	151	148	185	73	185	91	102	149	132	140	164	63	148	145	96	202	156	119
PPIEL	96	107	73	92	79	102	132	116	167	111	112	145	100	69	111	107	123	82	128	84	69	160	67	80
PABPC4	10973	8146	4114	4121	4421	4772	3285	3400	3383	3409	3082	3890	4274	4203	4174	4319	5817	4946	4693	4353	4592	5807	4490	5205
PABPC4-AS1	4	1	16	13	2	9	28	2	9	7	8	8	8	17	6	11	0	0	14	5	2	5	23	4
SNORA55	14	7	23	17	10	6	18	13	21	5	10	8	10	15	18	12	16	24	6	15	25	17	4	18
HEYL	465	493	286	342	496	407	292	286	468	383	377	368	478	408	402	576	658	567	579	396	470	605	435	585
NT5C1A	46	95	77	85	83	94	69	39	50	41	40	68	41	76	23	19	53	57	51	52	65	105	72	128
HPCAL4	320	513	410	399	412	384	282	348	357	360	257	311	372	421	409	518	513	422	393	380	431	506	368	470
PPIE	2449	3503	2472	3151	3033	3415	2773	3601	3449	3227	2676	3099	3332	3553	3422	4417	4348	3777	3733	3630	3222	3851	3585	3675
BMP8B	396	470	258	307	268	321	221	228	212	231	328	387	325	252	232	265	294	286	244	284	282	254	335	255
OXCT2	17	15	27	44	24	24	42	15	18	13	23	38	31	14	5	40	22	29	30	35	49	28	2	3
	9	3	0	11	21	16	11	6	14	7	8	11	1	5	6	0	5	2	25	3	6	7	19	3
LOC101929536	1	0	7	18	13	15	14	18	11	1	36	0	5	8	6	15	6	7	25	15	23	21	18	8
TRIT1	997	1364	1098	1428	1716	1539	1388	1584	1630	1463	1182	1462	1727	1781	1778	1890	1995	1578	1855	1839	1725	2063	1764	2122
MYCL	390	387	337	451	501	566	404	365	535	504	449	524	563	539	494	579	589	652	540	410	386	596	395	322
MFSD2A	218	270	191	309	488	390	441	372	516	403	459	531	708	746	807	849	865	661	746	891	818	988	659	875
CAP1	11534	13890	9602	10010	11121	11545	7845	8834	8862	8464	7283	8355	9658	8660	8161	8633	11297	10050	8620	9137	8765	10744	9140	10081
PPT1	7177	9138	6498	6325	6157	6377	4585	4764	4575	4604	4266	5054	5045	4473	4983	4960	5459	5378	4942	5117	5177	6237	5653	5256
RLF	2409	3432	2785	3127	3802	3936	3723	3982	4396	3902	3103	4012	4780	4466	4512	3452	4945	4580	4749	4919	4779	5496	4884	5265
TMCO2	0	0	0	0	0	0	0	0	0	0	0	0	0	0	0	0	6	0	0	4	0	0	0	0
ZMPSTE24	6745	8398	6601	7568	7807	7653	5970	6691	6851	6637	5802	6988	7464	6864	6551	7029	7956	7107	7659	7617	7041	8467	7522	8071
COL9A2	76	153	101	55	82	131	71	91	120	78	83	115	141	117	195	201	83	65	107	100	117	157	69	78
SMAP2	2521	3102	2282	3116	2859	3184	2858	3005	3228	3249	2285	2578	3333	2993	3311	3211	3737	3398	3004	3294	3060	3795	3402	3130
ZFP69B	190	216	162	214	305	248	319	248	241	276	245	256	341	274	336	148	286	225	258	305	262	295	367	277
ZFP69	390	604	402	628	602	704	635	616	803	543	504	816	744	836	647	762	815	711	637	814	724	783	715	770
EXO5	544	520	394	551	671	666	646	718	761	660	597	716	926	906	738	965	776	755	766	764	664	866	688	638
ZNF684	244	288	165	300	396	366	282	389	287	354	344	369	360	333	287	364	339	283	342	347	301	353	309	275
RIMS3	663	473	320	285	365	391	404	364	352	336	281	236	410	347	305	295	373	307	414	297	382	357	265	303
NFYC-AS1	122	67	70	92	159	81	121	122	176	70	102	107	157	99	131	136	108	113	113	100	152	55	100	152
NFYC	2899	3152	1764	1810	2156	2379	1640	1712	2044	1988	1799	1998	2286	2065	2251	2436	2815	2750	2585	2301	2279	2828	2362	2489
MIR30E	0	0	4	0	0	0	0	0	0	0	0	0	0	0	0	0	0	0	0	0	0	0	0	0
MIR30C1	0	0	0	0	0	0	0	0	0	0	0	0	0	0	0	0	0	0	0	0	0	0	0	0
KCNQ4	124	159	152	95	163	158	180	190	213	64	150	110	151	152	145	146	148	165	180	147	168	221	105	205
CITED4	44	83	34	52	70	69	59	54	26	46	61	24	70	60	20	64	84	35	67	55	48	30	33	101
CTPS1	10295	11210	8967	9644	9922	10159	8912	9637	10661	8940	9804	9772	10905	10171	11706	12442	12568	11108	11768	11834	12688	13242	10893	11626
SLFNL1-AS1	59	36	35	41	67	45	78	74	105	97	77	41	82	83	36	62	53	44	70	84	67	54	51	76
SLFNL1	40	16	54	29	47	32	50	16	36	17	79	47	59	30	64	28	44	56	38	25	39	56	16	22
SCMH1	1998	2182	1462	1610	1624	1810	1436	1528	1810	1475	1368	1668	1684	1720	1705	1471	1777	1672	1873	1644	1784	1847	1713	1879
FOXO6	214	311	163	148	171	304	158	230	231	128	214	135	213	152	159	182	278	285	218	139	241	231	185	201
EDN2	0	0	0	0	0	0	0	0	0	0	0	4	0	0	0	0	0	0	0	0	0	0	0	0
HIVEP3	345	300	301	226	235	282	210	256	229	267	238	262	277	243	235	267	266	355	345	353	268	342	242	383
GUCA2B	0	0	0	0	0	0	0	0	0	0	0	0	0	0	0	0	0	0	0	0	0	0	0	0
GUCA2A	0	0	0	0	0	0	0	0	0	0	0	0	0	0	0	0	0	0	4	0	0	0	0	0
FOXJ3	3045	3874	3059	3435	3942	3934	3525	4100	4444	4011	3583	4086	4872	4621	4979	3633	5453	4884	4755	5128	5030	5549	5027	5599
RIMKLA	568	715	506	679	755	680	619	668	755	685	667	724	870	860	763	712	993	917	885	910	919	906	776	899
ZMYND12	5	5	0	4	0	8	4	6	8	14	2	0	2	5	5	0	0	0	0	4	1	0	0	2
PPCS	633	909	794	846	769	786	776	744	821	773	656	666	916	902	1025	1179	1201	813	991	1079	941	1276	913	1047
CCDC30	28	17	22	33	44	19	44	42	35	26	16	52	43	51	25	54	70	23	54	40	62	20	38	29
PPIH	2180	2939	2194	2640	2701	2479	2048	2183	1989	2112	1669	1849	2232	1908	2099	3050	2460	2269	1996	2337	2199	2654	1996	2368
YBX1	49981	65728	51876	56467	64426	59453	44775	44256	44666	41500	37264	39372	44675	42080	38211	49391	49298	46507	40224	40546	37586	44643	39609	41071
CLDN19	0	0	0	2	0	0	0	0	0	0	0	0	0	0	6	0	0	0	0	6	0	0	0	0
P3H1	3201	3788	3514	3364	3687	3624	2693	2875	2765	2237	2534	2872	3141	2991	2919	3455	3709	3346	3233	3040	3019	3420	2721	3136
C1orf50	378	495	407	473	542	504	498	454	569	440	428	473	613	546	542	684	612	647	507	597	616	744	530	585
TMEM269	27	13	18	7	12	13	28	7	7	4	4	15	35	11	24	31	5	14	14	40	17	3	8	24
SVBP	507	688	521	476	530	583	421	448	407	465	403	486	521	452	483	577	569	480	376	413	462	565	484	530
ERMAP	290	419	385	364	387	382	306	315	303	407	329	302	380	346	486	344	470	407	480	331	332	389	329	366
ZNF691	781	1008	846	1032	1198	1339	1419	1444	1560	1208	1410	1427	1680	1340	1362	1788	1594	1248	1207	1141	1298	1505	1103	1184
LOC339539	0	0	0	1	0	3	0	4	0	0	0	2	2	0	0	0	0	3	0	0	8	2	0	0
SLC2A1	3042	3664	2885	2879	3225	3608	2912	2603	2566	2413	2428	2634	2889	2543	2729	2806	3330	3070	2995	3078	2855	3580	3048	3226
SLC2A1-DT	4	22	25	26	38	44	10	24	29	28	8	26	24	36	6	20	32	17	8	8	26	25	20	15
	8	2	0	0	12	8	12	5	40	0	0	8	0	2	4	7	0	4	0	18	20	0	0	0
CFAP144	16	38	35	25	53	11	42	46	21	20	15	21	15	17	28	31	32	4	7	27	14	6	0	23
EBNA1BP2	5660	7743	6235	6989	7685	7731	6039	6308	6712	6081	5417	6102	6949	6893	7177	8918	8365	7769	7555	7452	7108	8042	7696	7632
MIR6733	1	0	8	0	2	2	0	2	0	0	0	3	2	1	0	0	0	0	5	4	6	1	0	2
CFAP57	14	14	6	0	12	21	2	16	0	12	1	29	19	6	2	19	20	8	5	10	4	2	10	18
TMEM125	0	0	0	0	0	0	0	0	0	0	0	0	0	0	0	0	0	0	0	0	0	0	0	0
C1orf210	0	0	0	0	0	0	0	0	0	0	0	0	0	1	0	0	2	0	0	0	4	0	0	0
TIE1	1	0	0	0	0	2	0	0	0	0	0	0	0	0	0	0	0	0	0	6	0	3	0	1
MPL	4	10	8	0	2	1	14	10	0	7	6	10	0	9	7	0	4	11	4	6	14	0	17	36
CDC20	10155	13567	10574	12690	13494	14767	11817	12606	13565	12981	11673	11598	14067	14804	15005	17358	17873	15682	15815	15517	15382	17818	15113	15343
ELOVL1	2751	3377	2651	3463	3714	3747	3110	3367	3641	3222	3096	3263	3911	3139	3291	3903	3948	3754	3753	3788	3369	3993	3626	3673
MIR6734	0	0	0	0	0	0	0	0	0	0	0	0	0	0	0	0	0	0	0	0	1	0	0	0
MED8	1461	1892	1262	1572	1479	1912	1479	1693	1471	1727	1291	1224	1811	1694	1710	1835	2112	1903	1849	1687	1728	1962	2015	1997
SZT2	1174	1206	960	1223	1420	1187	1370	1352	1759	1016	1275	1278	1367	1306	1274	926	1541	1155	1250	1430	1468	1670	1298	1473
MIR6735	0	0	0	0	0	0	0	0	0	0	0	0	0	0	0	0	0	0	0	0	0	0	0	0
HYI	0	2	18	0	2	4	3	16	19	6	11	2	0	2	9	12	2	2	4	8	0	0	8	8
PTPRF	13708	14073	7802	7193	7103	8047	5231	4736	5382	5115	5248	5798	5893	5572	4821	4494	7088	6038	5926	5589	5460	6851	5166	5855
KDM4A	4587	5256	3340	3598	3965	4135	3102	3354	3748	3281	3209	3987	3847	3859	3590	3345	5094	4586	4434	4010	4042	5065	4539	4114
KDM4A-AS1	40	41	23	85	78	93	76	59	49	71	45	93	58	83	57	33	63	101	89	48	73	86	18	40
ST3GAL3	235	392	236	357	282	236	244	196	219	190	242	252	201	179	273	232	338	228	197	298	277	337	245	240
ST3GAL3-AS1	0	6	0	1	0	0	0	4	0	0	1	7	1	2	1	21	0	4	0	0	0	10	4	0
MIR6079	0	0	0	0	0	0	1	0	0	0	0	0	0	0	0	0	0	0	0	0	0	0	0	0
ARTN	24	4	10	30	40	26	17	34	28	15	8	34	61	29	57	29	24	70	9	9	42	18	43	32
IPO13	3343	3690	2618	3138	3072	3493	2651	2605	3058	2969	2763	2965	3359	3060	2981	3214	3672	3308	3535	3321	3055	3941	2906	3162
DPH2	4160	4262	2404	2498	2567	2700	1960	2151	2428	2170	2217	2352	2678	2334	2535	2492	3062	2876	2876	2716	2759	3406	2671	2664
ATP6V0B	5263	6459	4518	5195	5454	5767	4500	4363	4307	4318	4342	4259	4975	4310	4674	6181	5835	5401	5209	5035	4683	5793	4828	5131
B4GALT2	3416	4326	2764	2873	3439	3561	2526	2586	2795	2630	2325	2564	3012	2672	2790	3521	3433	3569	3330	3106	2799	3607	2853	3286
CCDC24	111	92	70	44	92	149	100	64	109	108	124	91	153	129	118	156	117	106	95	135	127	172	130	102
SLC6A9	670	785	563	681	810	811	670	566	486	477	470	373	447	381	437	341	401	401	283	246	297	382	222	282
KLF17	0	0	0	0	0	0	0	0	0	0	0	0	0	0	0	0	0	0	0	0	0	0	9	0
KLF18	0	0	0	0	0	0	0	0	0	0	0	0	0	0	0	0	0	0	0	0	0	0	0	0
DMAP1	1355	1848	1479	1541	1729	1870	1549	1615	1468	1389	1674	1566	1748	1473	1767	2520	1958	1752	2142	1775	1543	1813	1469	1808
ERI3	3617	4477	2786	3446	3519	3977	2787	3008	3131	3134	2694	2556	2909	3179	3135	3808	3769	3269	3434	3216	3002	3550	3105	3020
ERI3-IT1	22	12	16	18	14	20	14	12	12	29	27	14	21	35	30	19	27	18	16	5	26	48	9	12
RNF220	3725	4686	3803	4057	5131	4645	4015	4463	4688	4203	3957	4186	5245	4822	4944	5609	5659	5330	5273	5172	5108	5776	4934	5285
MIR5584	0	0	0	0	0	0	0	0	0	0	0	0	0	0	0	0	0	0	0	0	0	0	0	0
TMEM53	201	244	180	232	207	204	175	223	182	183	235	163	232	212	137	269	302	277	165	254	168	320	225	194
ARMH1	2	0	28	4	16	7	2	0	0	24	4	10	0	12	0	14	8	6	11	8	4	10	0	4
RNU5F-1	0	0	0	0	0	0	0	0	0	0	0	0	0	0	0	0	0	0	0	0	0	0	0	0
RNU5D-1	0	0	0	0	0	0	0	1	0	0	0	2	2	0	0	0	0	0	0	0	0	0	0	0
KIF2C	4090	3540	1892	2113	2123	2288	1721	1933	2008	1832	2019	1976	2182	2232	2381	2585	2608	2190	2293	2360	2417	2824	2041	2567
RPS8	55359	72311	59646	71196	78265	74129	60684	66003	65726	61636	54634	56360	68169	68828	64139	99787	73335	69682	64889	67876	61866	70134	64035	66637
SNORD55	84	138	155	95	119	183	129	121	125	124	121	130	185	187	157	232	129	210	153	214	148	166	132	166
SNORD46	12	19	17	8	33	17	11	35	55	7	27	18	28	16	14	21	12	16	10	21	21	16	12	22
SNORD38A	9	6	10	8	4	11	30	15	11	10	42	2	29	17	10	9	25	3	9	14	27	16	27	4
SNORD38B	48	28	35	51	54	28	53	52	61	57	50	23	43	73	36	85	55	47	73	71	41	79	98	64
BEST4	6	6	4	0	11	4	0	11	8	10	2	0	23	18	2	9	0	1	0	17	9	12	5	0
PLK3	106	98	78	129	187	190	181	178	210	163	150	132	238	193	285	312	305	229	148	225	267	276	225	269
DYNLT4	0	0	1	4	0	0	0	0	0	1	0	2	2	0	0	0	0	0	0	0	0	0	0	0
BTBD19	6	14	4	19	3	7	2	11	20	12	20	1	6	2	3	0	18	2	27	3	12	26	0	8
PTCH2	120	71	58	69	62	81	126	45	105	79	94	108	77	58	137	173	89	94	85	114	78	65	35	88
EIF2B3	2836	3006	1435	1570	1767	1607	1246	1256	1426	1231	1194	1646	1408	1278	1231	1920	1696	1492	1534	1545	1384	1797	1477	1754
HECTD3	2213	2988	2113	2218	2465	2629	1911	1775	1725	1952	1839	1726	2148	1858	1900	1849	2156	2093	2014	1857	1725	2353	1709	1935
UROD	3462	4297	3575	4269	4151	4467	3694	3877	4215	3557	3247	3426	3628	3469	3552	5008	4274	3789	4068	3755	3844	4238	3626	3553
ZSWIM5	1044	1038	818	831	882	866	657	809	805	891	651	804	929	896	892	781	1056	791	964	919	937	1029	898	945
LINC01144	32	34	18	27	20	35	46	24	18	27	32	20	44	32	57	38	15	36	43	44	48	65	16	26
HPDL	8	1	2	0	8	0	0	19	0	1	17	2	10	6	16	0	10	0	5	6	15	1	10	2
MUTYH	658	502	514	666	577	622	601	591	631	505	696	614	753	657	705	923	859	637	871	753	800	865	667	894
TOE1	1182	1546	1419	1670	1678	1745	1635	2015	2110	1838	1624	1649	2356	2482	2564	2369	2449	2088	2322	2662	2253	2615	2241	2304
TESK2	407	292	206	190	234	252	178	152	197	185	188	211	251	217	202	203	253	194	196	162	214	284	182	147
CCDC163	240	283	237	366	390	366	351	433	432	462	368	392	589	568	602	576	589	650	679	785	647	780	670	855
MMACHC	1389	1940	1473	1928	1783	1961	1989	2000	2323	2172	1909	2274	2726	2779	2686	3050	3308	2869	2866	2723	2750	3174	2552	2893
PRDX1	29573	38340	31739	37383	42294	42103	34477	38601	38339	37296	30809	35627	41706	40650	38968	53729	45340	42251	39115	41055	37778	44808	39095	42062
AKR1A1	2040	2396	2275	2520	2739	2722	2511	2516	2643	2607	2241	2224	2842	2548	2731	3399	3132	2750	2748	2782	2699	3152	2499	2856
NASP	11994	14128	12212	14512	15403	15513	13182	14560	15153	13143	12018	13314	15851	14593	14931	18785	16120	14922	15037	15068	15031	17141	14475	15564
CCDC17	12	26	10	23	33	12	20	34	47	26	14	12	19	36	15	22	31	10	19	27	39	10	0	26
GPBP1L1	4370	4779	4021	4739	5161	5447	5137	4952	5120	5001	4404	5660	5868	5106	5559	5469	5763	5362	5393	5477	5344	6103	5417	5728
RPS15AP10	2	2	6	0	0	6	7	0	0	0	0	0	14	2	0	0	0	2	2	1	16	2	1	0
TMEM69	1022	1516	1333	1311	1443	1518	1198	1363	1396	1186	1006	1029	1492	1455	1465	1313	1512	1367	1430	1396	1372	1529	1202	1380
IPP	712	812	711	695	722	687	771	740	719	569	701	750	964	900	934	791	1015	891	950	1022	967	891	986	956
MAST2	2970	3113	1669	2035	2047	2632	2068	1816	2131	2115	2370	2375	2486	2171	2138	2063	2923	2514	2458	2561	2527	3100	2522	2940
PIK3R3	3470	4152	3417	4023	4590	4833	4321	4978	4883	4656	3799	4689	5143	5188	4327	4036	5244	4859	4473	4779	4202	4765	4862	4589
LOC101929626	0	0	6	0	3	2	4	3	4	0	0	0	6	0	0	0	0	14	12	24	4	0	18	0
TSPAN1	7	0	14	3	4	4	2	14	19	0	4	4	7	9	11	0	0	6	3	19	3	0	0	21
POMGNT1	2290	2471	1843	1941	2267	2341	1832	1584	1960	1816	1836	1682	2099	1844	2095	2286	2273	1996	2157	2151	2166	2481	1958	2276
LURAP1	17	44	29	38	43	47	34	47	52	41	30	18	44	49	40	49	53	51	25	40	32	88	36	34
RAD54L	3456	2889	1791	1774	1958	2243	1690	1772	2227	1600	1927	2059	2335	1939	2276	2346	2239	2254	2268	2290	2240	2675	2350	2901
LRRC41	4958	5678	3697	4099	4486	4852	3570	3649	4002	3645	3701	3847	4322	4464	4707	4810	5961	6023	5439	5013	4770	6039	5043	5416
UQCRH	5724	7430	6071	7418	8474	7674	6189	7084	6535	6358	5528	5844	7757	7588	7048	12016	7701	7541	7638	7806	7066	7808	7269	7876
NSUN4	1625	1922	1586	1954	2273	2342	2100	2136	2234	1968	1828	2153	2268	2372	2406	2369	2762	2556	2585	2549	2210	2768	2591	2524
FAAH	90	125	81	138	115	179	124	115	208	119	196	135	123	121	129	181	90	133	119	110	157	132	218	217
FAAHP1	31	10	36	51	49	26	38	64	44	68	41	13	59	58	22	35	25	43	43	48	84	57	39	32
LINC01398	2	1	0	0	1	2	2	0	4	11	0	0	8	0	0	4	0	2	7	2	28	16	2	8
DMBX1	219	260	157	234	212	254	277	281	325	235	247	201	324	244	219	275	446	320	309	286	260	370	215	392
MKNK1-AS1	4	9	4	12	8	9	5	26	30	16	3	26	24	1	9	7	2	3	15	21	29	9	39	9
KNCN	0	0	0	0	0	0	0	0	8	0	0	0	0	0	0	0	0	0	0	0	0	0	0	0
MKNK1	902	948	624	563	758	780	519	600	653	702	754	580	726	671	620	824	636	717	605	635	658	752	786	809
MOB3C	46	103	42	115	190	136	128	54	126	127	134	104	136	137	94	95	84	130	77	161	156	176	121	73
ATPAF1	5253	6325	3983	4050	4054	4017	2851	2966	3028	2992	2721	3185	3421	3011	3159	3444	4271	3577	3779	3415	3240	3994	3679	3501
TEX38	0	1	0	0	2	0	0	0	0	0	0	0	0	0	0	0	0	0	2	0	4	0	0	0
EFCAB14-AS1	1	2	1	2	10	1	1	1	0	0	0	0	0	1	2	7	2	2	0	1	0	0	5	0
EFCAB14	2471	2947	2402	2787	3074	3069	2574	2674	3059	2981	2452	3004	3333	3066	3177	2346	3577	3102	2968	3102	3021	3433	3106	3295
CYP4B1	0	0	0	0	0	0	0	0	0	0	0	0	0	0	0	0	0	0	0	0	0	0	0	0
CYP4Z2P	0	0	0	0	0	0	0	0	0	0	0	0	0	0	0	0	0	0	0	0	0	0	0	0
CYP4A11	0	0	0	0	0	0	0	0	0	0	0	0	0	0	0	0	0	0	0	0	0	0	0	0
CYP4X1	20	49	42	27	43	42	47	59	27	44	56	82	61	33	24	41	71	33	12	46	49	55	36	50
CYP4Z1	0	0	0	0	0	0	0	2	0	0	0	0	3	0	0	0	0	0	0	0	0	0	0	0
CYP4A22	0	0	0	0	0	0	0	0	0	0	0	0	0	0	0	0	0	0	0	0	0	0	0	0
LINC00853	0	11	2	4	16	12	10	10	7	6	0	10	0	12	4	18	10	19	20	22	6	9	20	6
PDZK1IP1	0	0	0	0	0	0	0	0	0	0	0	0	0	0	0	0	0	0	0	0	0	0	0	0
TAL1	63	96	94	41	125	85	74	100	155	85	98	88	124	106	123	124	158	130	146	97	159	130	74	138
STIL	3183	3648	2772	3026	3788	3793	3169	3784	3911	3534	3179	4012	4569	3775	4313	2984	4663	3914	3881	4210	4008	4411	4393	4535
CMPK1	3704	4130	2233	2219	2122	2352	1544	1812	1692	1672	1621	2122	2110	2110	1917	2183	2331	2290	2107	1896	2077	2143	2342	2683
LINC01389	9	13	20	9	3	4	10	8	14	10	8	6	9	2	4	12	0	10	0	0	3	4	0	20
FOXE3	0	0	0	1	3	4	4	3	2	2	0	3	0	4	0	0	0	0	0	2	0	10	0	0
FOXD2-AS1	389	445	223	336	502	326	365	344	340	255	310	303	443	342	338	366	426	432	366	345	395	355	342	299
FOXD2	458	660	485	657	893	843	851	798	908	659	605	677	836	696	616	650	910	739	671	742	571	629	484	586
TRABD2B	189	175	186	282	259	247	227	264	238	260	238	242	304	303	316	288	262	236	349	319	344	333	287	211
SKINT1L	0	0	0	0	0	0	0	0	0	0	0	0	0	0	0	0	0	0	0	0	0	0	0	0
SLC5A9	0	0	0	5	8	0	11	2	13	2	4	2	5	0	18	4	2	2	13	6	3	6	1	0
SPATA6	182	291	184	181	291	257	241	231	200	199	219	234	250	244	257	244	276	239	234	262	229	241	235	255
AGBL4	3	6	14	0	0	8	2	12	30	0	6	18	2	8	0	8	2	6	6	2	9	33	12	17
BEND5	33	22	32	38	60	36	20	42	51	41	44	68	60	64	27	56	72	65	44	55	39	25	53	17
AGBL4-AS1	0	0	0	0	0	0	0	0	0	0	0	0	0	0	0	0	5	2	0	0	0	0	0	0
AGBL4-IT1	0	0	0	0	0	0	0	0	0	0	0	0	0	0	0	0	0	0	0	0	0	0	0	0
ELAVL4	4	0	0	2	2	0	0	2	0	0	8	4	0	0	20	0	12	4	0	16	12	4	8	0
DMRTA2	52	102	62	92	160	88	107	127	76	88	112	96	123	151	125	149	151	129	77	142	100	194	150	135
FAF1	3801	4005	2608	2449	2513	2831	2111	1955	2274	2158	2233	2243	2283	2490	2357	2657	3392	2719	2882	2725	2716	3029	2590	2839
CDKN2C	3693	3604	2133	2321	2366	2571	2265	1981	2145	2102	2018	2083	2418	2264	2156	2661	2734	2685	2233	2422	2412	3081	3010	2900
MIR4421	0	0	0	0	0	0	0	0	0	7	0	0	0	0	0	0	0	0	0	0	0	4	0	0
MIR6500	0	0	0	0	0	0	0	0	0	7	0	0	0	0	0	0	0	0	0	0	0	0	0	0
C1orf185	0	1	0	0	0	0	0	0	0	0	0	0	0	0	0	0	0	0	0	0	0	0	0	0
RNF11	2268	3060	2588	2851	3399	3157	2655	3058	3237	3127	2568	3205	3531	3719	3696	3460	4259	3493	3524	3798	3262	3891	3866	3936
TTC39A	267	316	207	273	248	248	282	281	249	207	203	230	182	200	264	224	278	186	220	244	180	257	293	266
TTC39A-AS1	0	0	0	0	0	0	0	0	0	0	0	0	0	0	0	2	0	0	1	0	3	0	0	0
EPS15	3317	4044	3229	3410	3841	3488	3150	3509	3190	3057	2482	3190	3710	3279	3078	2508	3738	3322	3769	3301	3127	3635	3334	3835
OSBPL9	3980	4767	3216	3676	3850	3704	2690	3147	2970	3001	2731	3228	3231	3270	3371	2916	4203	3713	3268	3236	3315	4340	3669	3631
NRDC	9499	11499	8092	9029	9082	9658	7213	8048	7936	7429	6576	7038	7705	7104	7069	7073	8391	7797	7780	7419	6765	8642	7544	7691
MIR761	0	0	0	0	0	0	0	0	0	0	0	0	0	0	0	0	0	0	0	0	0	0	0	0
RAB3B	513	500	534	311	388	409	420	365	378	312	284	379	420	402	382	262	458	382	353	271	369	499	407	494
TXNDC12	3482	3770	2454	2327	2674	2453	1791	1690	1760	1762	1470	2001	2005	2030	1919	2462	2427	2204	1963	2421	2146	2532	2034	2297
KTI12	0	0	0	0	0	0	0	0	0	0	0	0	0	0	0	0	0	0	0	0	0	0	0	0
TXNDC12-AS1	0	0	0	2	1	0	0	4	4	0	5	0	0	2	0	0	2	0	2	0	0	0	5	0
BTF3L4	2384	3375	2445	2894	3472	3475	3193	3814	3678	3595	3063	3812	4530	4170	4377	4331	4485	3847	4321	4449	4190	4827	4020	4421
ZFYVE9	2120	2556	1632	1715	2009	2147	1586	1777	1869	1721	1501	1721	1972	2043	1798	1734	2547	2206	1953	2243	2172	2367	2254	2271
CC2D1B	2158	1802	938	1283	1452	1562	1171	1319	1402	1156	1282	1228	1425	1354	1619	1599	1817	1406	1491	1502	1507	1888	1579	1570
ORC1	2386	2797	2216	2391	2625	2753	2329	2400	2788	2938	2422	2476	2806	2867	2960	3070	2930	2747	3095	2803	2780	3186	2888	3028
PRPF38A	6349	8090	6023	7281	7786	8233	6901	7283	7888	7151	6069	7195	8180	7819	7396	7927	9346	8393	8240	8029	7773	9608	8363	8833
TUT4	4329	4416	3111	3733	3783	4200	3468	3678	4010	3730	3190	4044	4121	3680	4066	3052	4433	4214	4118	4170	4055	4855	3979	4947
	5	13	7	3	9	31	4	0	8	1	0	3	0	7	2	4	5	7	19	11	8	14	1	4
GPX7	0	2	0	0	2	4	0	0	0	0	0	0	2	0	0	8	14	2	0	0	0	4	4	0
SHISAL2A	0	0	0	0	0	0	0	0	0	2	0	0	0	0	0	0	0	0	0	0	0	0	0	0
COA7	2470	3187	2469	3615	3646	3705	3424	3755	4294	3803	3811	3653	5132	4620	5108	3975	5135	4913	4506	5050	4538	5360	4704	5002
ZYG11B	4251	5253	3777	4284	4384	4538	3887	4543	4979	4384	4012	5097	5235	4827	4827	3050	5716	5398	5058	5538	5110	6103	5648	6173
ZYG11A	970	1057	854	1009	1109	1126	1031	1131	1155	779	1038	1091	1294	1203	1110	1009	1236	1127	1200	1142	1281	1452	1091	1302
ECHDC2	188	139	142	214	226	180	203	185	179	172	180	207	258	220	214	142	223	191	200	190	174	201	206	263
SCP2	3173	4321	3365	4300	4464	4067	3624	3592	3630	3481	2931	3475	3727	3757	3826	3682	4034	3787	3605	3738	3541	4374	3593	3543
	0	0	0	0	0	0	0	0	0	0	0	0	0	0	0	0	0	0	0	0	0	0	0	0
	0	0	0	0	0	1	0	0	0	0	0	0	0	0	0	0	0	0	0	0	0	0	0	0
	0	0	0	0	0	0	0	0	0	0	0	0	0	0	0	0	0	0	0	0	0	0	0	0
PODN	0	0	0	0	0	0	0	0	1	0	0	0	0	0	0	0	0	0	0	0	0	0	0	4
SLC1A7	0	0	0	0	0	0	0	0	0	0	0	1	0	0	0	0	0	0	0	0	0	0	0	0
CPT2	1779	2106	1555	1924	1988	1924	1697	2172	2104	2074	1524	2016	2567	2243	2269	2286	2801	2272	2384	2584	2113	2802	2152	2201
CZIB	1048	1494	1244	1344	1524	1451	1161	1312	1450	1385	1148	1229	1566	1436	1404	1868	1485	1446	1556	1557	1415	1701	1537	1370
MAGOH	2747	3328	2693	3254	3818	3576	2927	3779	3494	3251	2707	3226	4063	4241	4204	5866	4673	4624	4252	4622	4447	4849	4518	4915
MAGOH-DT	21	14	10	34	56	45	19	38	51	36	27	41	47	37	48	58	56	44	32	27	47	8	16	30
LRP8	1067	1161	881	1022	1192	1209	1092	1003	1227	1038	956	970	1114	1070	1271	937	1206	847	1105	1034	1028	1059	796	1193
SLC25A3P1	0	0	0	0	0	0	0	0	0	0	0	0	0	0	0	0	0	0	0	0	0	0	0	0
DMRTB1	0	0	0	0	0	0	0	0	0	0	0	0	0	0	0	0	0	0	0	0	0	0	0	0
GLIS1	20	18	30	36	42	54	32	14	39	21	37	32	25	17	32	29	36	14	32	30	48	17	32	16
	0	2	1	2	0	0	1	0	2	1	0	0	0	0	22	0	0	0	2	0	1	0	0	0
NDC1	9291	11344	6865	7013	7386	6692	5105	5262	5545	5976	4973	5668	5807	5265	5401	5208	6937	6059	5803	5821	5776	7246	6647	6535
YIPF1	804	1129	829	995	1136	1047	847	944	971	842	933	1019	854	856	962	1156	1182	1002	856	906	797	942	1039	983
DIO1	2	0	0	0	1	0	2	1	2	0	0	0	0	2	0	2	4	0	1	0	0	0	2	4
IFT25	848	1101	904	1176	1147	1193	1068	1110	1121	1188	1265	1043	1136	1229	1333	1661	1446	1160	1146	1347	1257	1321	1171	1210
LRRC42	1848	2702	1886	2705	2718	2811	2234	2920	2771	2579	2133	2689	3119	3078	3101	3795	3301	2857	3188	3230	2855	3592	2908	3152
LDLRAD1	0	0	0	0	0	0	0	0	0	0	0	0	0	0	0	0	0	0	0	0	0	0	0	0
TMEM59	3815	4608	4076	4872	4882	4685	4158	4489	4438	4009	3678	4288	4516	4116	4575	4774	4822	5017	4870	4368	4140	4857	4162	4568
TCEANC2	1253	1340	1099	1081	1348	1265	1138	1413	1386	1299	1211	1174	1661	1531	1444	1504	1628	1558	1455	1531	1464	1653	1345	1375
MIR4781	0	0	0	0	0	0	0	0	0	0	0	0	0	0	0	0	0	0	0	0	0	0	0	0
CDCP2	3	3	16	4	8	2	4	0	2	4	2	0	4	1	4	3	0	0	0	0	0	22	0	14
CYB5RL	867	1008	663	834	1022	880	745	793	935	855	837	876	893	926	992	624	1134	1133	1140	1008	934	935	654	1018
MRPL37	9613	13536	9907	11571	12040	11370	9664	9889	10162	9399	8279	9056	10813	10090	10356	12852	12907	11527	10906	11184	10971	12181	10989	10857
SSBP3	1067	1397	1054	1338	1421	1294	1075	1209	1240	1128	1075	1180	1311	1415	1548	1104	1349	1284	1335	1338	1330	1237	1168	1189
SSBP3-AS1	14	8	17	7	43	26	22	6	28	18	26	14	32	21	28	28	33	20	16	2	19	51	18	22
ACOT11	63	74	50	48	74	67	55	58	113	39	70	60	57	57	58	66	61	69	80	52	81	64	46	43
FAM151A	2	1	3	0	14	6	0	1	5	1	0	0	7	2	2	8	0	0	0	5	0	1	0	0
MROH7	0	2	0	0	0	0	1	0	0	0	0	0	0	0	0	0	0	0	0	0	0	0	0	0
MROH7-TTC4	0	0	0	0	0	1	0	0	0	0	0	0	0	0	0	0	0	0	0	0	0	0	0	0
TTC4	37	61	52	43	39	76	44	57	62	35	46	44	89	62	56	62	32	80	68	91	92	108	66	57
PARS2	662	928	872	1263	1537	1559	1533	1759	2093	1921	1575	2052	2184	2215	1996	2023	2376	2135	2152	2385	1938	2466	1779	2199
TTC22	0	0	0	0	0	0	0	0	0	0	0	0	0	0	0	0	0	0	0	0	0	0	0	0
CIMAP2	2	0	0	0	2	1	0	0	0	2	0	0	0	0	0	0	0	0	0	2	0	0	0	0
DHCR24	19105	23508	15674	17453	17609	17855	13225	13390	13857	12681	11475	12499	13655	12242	12311	11855	15739	14419	13430	12554	11838	15128	12526	12475
	0	0	0	0	0	0	0	0	0	0	0	0	0	0	0	0	0	0	0	0	0	0	0	0
TMEM61	0	0	0	0	0	0	0	0	0	0	0	0	1	0	0	0	0	0	1	1	0	1	0	0
BSND	0	0	0	0	0	0	2	0	0	0	0	0	4	0	0	0	0	0	0	0	0	0	0	0
PCSK9	2	0	0	0	0	0	0	0	0	10	0	12	0	0	0	2	0	0	0	0	0	0	0	0
USP24	8163	9675	5920	6456	6900	6756	5447	5459	6291	5448	4996	6340	6282	6182	6085	4023	7307	7024	6536	6877	6803	8045	7329	7781
LOC100507634	13	49	16	30	36	50	24	13	49	42	18	36	40	34	14	37	30	66	40	30	44	79	19	32
MIR4422	0	0	0	0	0	0	0	0	0	0	0	0	0	0	0	0	0	0	0	0	0	0	0	0
PLPP3	834	881	712	936	1117	1072	1054	934	1175	825	842	1024	1174	964	1060	831	1208	1051	875	984	910	1124	910	966
PRKAA2	3067	3536	2090	2433	2825	2869	2379	2518	2871	2372	2169	2701	2853	2767	2612	1758	3307	2754	2743	2900	2415	3054	2808	2956
FYB2	6	1	2	0	0	4	0	13	2	0	0	1	5	6	6	6	2	0	0	6	2	0	0	0
C8A	0	0	0	0	0	0	0	0	0	0	0	0	0	0	0	0	0	0	0	0	0	0	0	0
C8B	0	0	0	0	0	0	0	0	0	0	0	0	0	0	0	0	0	0	0	0	0	0	0	0
DAB1	14	20	16	18	19	15	22	27	6	12	4	14	7	20	27	0	20	5	32	16	8	32	16	2
DAB1-AS1	0	0	0	0	0	0	0	0	0	0	0	0	0	0	0	0	0	0	0	0	0	0	0	0
OMA1	1428	1685	1366	1795	1951	1933	1610	1795	1860	1730	1734	1829	1916	1871	1947	1999	2051	1924	2015	1784	1948	2388	1914	1896
TACSTD2	0	0	0	0	0	0	0	0	0	0	1	0	0	0	0	0	0	0	0	0	0	0	0	0
MYSM1	2891	2541	2553	3334	2946	3280	3226	3457	3891	2888	3126	3815	3586	3470	3792	2317	3495	3033	3640	3835	3873	4234	3614	4167
JUN	14619	19994	18878	27733	36364	35805	32703	30994	28994	26228	23483	23830	30122	28249	27410	27327	33268	30345	28063	26457	23352	29481	24969	23204
JUN-DT	0	0	0	0	4	3	0	0	0	0	0	1	0	0	5	0	0	0	0	0	0	0	0	0
LINC01358	0	0	0	0	0	0	0	0	0	0	0	0	0	0	0	0	0	0	0	0	0	0	0	0
HSD52	0	0	0	0	0	0	0	0	0	0	0	0	0	0	0	0	0	0	0	0	0	0	0	0
FGGY	121	187	127	140	117	117	173	132	173	116	80	147	188	126	183	158	103	175	184	159	170	139	92	154
MIR4711	0	0	0	0	0	0	0	0	0	0	0	0	0	0	0	0	0	0	0	0	0	0	0	0
LOC101926944	0	0	0	0	0	0	0	0	0	0	0	0	0	0	0	0	0	0	0	0	0	0	0	0
HOOK1	2525	2970	2166	2296	2520	2188	1896	2110	2143	1991	1709	2230	2520	2066	2198	1755	2694	2370	2210	2318	2440	2711	2552	2361
CYP2J2	231	228	232	271	342	200	278	293	214	290	216	281	271	164	253	184	352	232	224	187	195	278	212	233
C1orf87	0	0	0	0	0	0	0	0	0	0	0	0	0	0	0	0	0	0	0	0	0	0	0	0
LOC101926964	0	0	0	0	0	0	6	0	0	0	0	0	4	0	0	0	0	0	0	0	0	0	0	0
NFIA-AS2	0	0	0	0	0	0	0	0	0	0	0	0	0	0	0	0	0	0	0	0	0	0	0	4
NFIA	835	993	777	1352	1681	1439	1482	1529	1692	1426	1242	1494	1616	1530	1715	1285	1655	1522	1391	1426	1735	1779	1361	1591
NFIA-AS1	0	0	0	0	0	0	0	0	0	0	0	0	0	0	0	0	0	0	0	0	0	0	0	0
MGC34796	0	0	0	0	0	0	0	0	0	0	0	0	0	0	0	0	0	0	0	0	0	0	2	0
TM2D1	744	907	910	851	1025	939	838	962	1023	1186	920	1061	1186	1171	1109	1516	1300	1297	1328	1299	1315	1466	1244	1540
PATJ	1044	1189	961	1170	1204	1155	990	1255	1004	998	842	871	1150	1063	952	1001	1016	1036	1041	1009	1074	1066	929	1072
MIR3116-1	0	0	0	0	0	0	0	0	0	0	0	0	0	0	0	0	0	0	0	0	0	0	0	0
MIR3116-2	0	0	0	0	0	0	0	0	0	0	0	0	0	0	0	0	0	0	0	0	0	0	0	0
L1TD1	0	0	0	0	0	0	0	0	0	0	0	0	0	0	0	0	0	0	0	0	0	0	0	0
KANK4	0	0	0	10	0	0	4	0	8	4	0	10	4	2	4	4	0	0	4	0	0	0	0	0
USP1	8934	11134	9234	11113	12554	12223	11470	12911	13851	12596	10542	12998	15001	14666	15307	13244	15311	14062	14247	15557	14519	16451	14295	15438
DOCK7	3721	4867	2627	2864	3118	2726	2075	2482	2593	2257	2313	2169	2543	2683	2582	1851	2992	2446	2818	2811	2783	3125	2793	3055
ANGPTL3	8	1	0	6	4	0	0	2	8	0	4	0	0	0	0	8	0	0	0	7	0	0	0	0
ATG4C	1899	2381	1762	2256	2323	2231	1665	2191	2208	2046	1964	2121	2500	2390	2191	2384	2548	2250	2192	2292	1861	2701	2166	2602
LINC00466	0	0	3	2	0	0	3	0	0	0	1	0	0	0	0	0	3	0	0	0	0	0	0	0
FOXD3-AS1	111	143	116	107	103	108	71	96	98	110	77	158	134	99	136	78	113	107	154	91	101	96	141	105
FOXD3	113	145	108	236	234	265	209	212	164	192	187	186	208	184	161	272	217	186	153	219	201	245	149	165
MIR6068	0	0	0	0	0	0	0	0	0	0	0	0	0	0	0	0	0	0	0	0	0	0	0	0
ALG6	2508	2841	2579	2841	2755	2692	2431	2804	2731	2512	2264	2869	2971	2864	2771	3004	3423	2851	3085	2769	3125	3770	3219	3075
ITGB3BP	1647	2061	1802	2075	2153	1960	1976	2123	2125	1964	1669	1604	2044	1972	2143	2912	2228	2015	2155	1973	1997	2085	1891	2057
EFCAB7	552	653	677	796	797	708	693	764	899	768	657	777	939	726	850	850	833	772	800	666	627	810	562	768
DLEU2L	7	22	18	12	14	4	26	14	20	0	10	18	32	10	2	18	0	0	22	14	40	9	19	26
PGM1	3764	4872	3515	3757	3984	3854	2946	2980	3069	2591	2687	2741	3273	3047	2918	3392	3835	3085	3242	3177	2924	3395	3345	3088
ROR1	811	816	736	935	896	798	708	835	778	666	640	821	955	936	761	529	848	775	889	747	888	890	804	660
ROR1-AS1	0	0	0	0	0	0	0	0	0	0	0	0	0	0	0	0	0	0	0	0	0	0	0	0
UBE2U	3	0	0	0	0	0	0	0	0	0	1	0	0	0	0	0	0	0	6	0	0	0	0	0
CACHD1	3261	3453	3043	3400	3754	3560	3314	3478	3516	3286	2598	3308	3937	3616	3214	2884	3928	3619	3562	3455	3282	4007	3201	3368
MIR4794	0	0	0	0	0	0	0	0	0	0	0	0	0	0	0	0	0	0	0	0	0	0	0	0
RAVER2	3263	3883	3163	3415	3655	3490	3153	3106	3517	2836	3091	3296	3653	3499	3139	2920	3512	3375	3504	3343	3358	3859	3214	3325
JAK1	5276	5576	2905	3144	2989	3378	2503	2480	2744	2397	2449	3300	2946	2993	2917	2250	4041	3731	3132	3321	3421	4135	3823	3678
LINC01359	2	0	0	2	0	0	4	2	0	4	0	0	3	1	3	0	0	1	0	0	2	8	0	12
	0	0	0	6	6	2	2	2	0	1	2	8	0	3	0	8	26	0	0	0	0	0	0	2
MIR3671	0	0	0	0	8	0	6	1	2	2	0	1	2	6	7	8	0	4	5	4	0	0	0	7
MIR101-1	0	0	0	0	0	0	0	0	0	0	0	0	0	0	0	0	0	0	0	0	0	0	0	0
AK4	3137	3932	3161	3413	3358	3389	3112	3377	3539	3094	2672	3040	4044	3827	3671	3220	4283	3457	3790	4276	3669	4412	3833	3837
DNAJC6	1326	1739	1352	1615	1718	1572	1306	1577	1804	1681	1511	1708	1816	1910	1778	1234	2201	1767	1862	1852	2043	2020	1949	1907
LEPROT	1322	1825	1488	1735	1931	1880	1949	2056	1988	1958	1683	1904	2527	2143	2273	2062	2316	2166	2210	1984	1977	2348	1990	2073
LEPR	968	1064	1049	1091	1112	1115	982	988	1005	962	726	935	893	869	976	743	987	846	818	902	861	880	940	925
PDE4B	48	29	10	80	74	38	29	37	27	20	44	52	38	19	30	22	14	6	17	36	12	13	20	12
PDE4B-AS1	0	0	0	0	0	0	0	0	0	0	0	0	0	0	0	0	0	0	0	0	0	0	0	0
SGIP1	2	0	6	7	4	0	8	12	2	0	2	16	0	0	0	0	0	2	6	2	0	0	0	0
MIR3117	0	0	0	0	0	0	0	0	0	0	0	0	0	0	0	0	0	0	0	0	0	0	0	0
DYNLT5	0	0	0	0	0	0	0	0	0	0	0	0	0	0	0	0	0	0	0	0	0	0	0	0
INSL5	0	4	0	0	0	0	0	0	0	0	0	0	0	0	0	0	0	0	0	0	0	0	0	0
DNAI4	26	42	40	46	59	46	63	80	59	26	18	44	41	67	50	85	74	71	66	35	31	72	59	14
MIER1	3237	3737	3189	3910	4329	4611	4256	4782	4738	4543	3632	4723	5204	5120	4915	3908	5393	4814	4855	5133	4586	5388	5585	5495
SLC35D1	1722	2215	1584	2215	2358	2381	2298	2185	2335	2388	1994	2007	2643	2578	2395	1932	3222	2209	2515	2498	2662	3062	2479	2567
C1orf141	0	0	0	0	0	0	0	0	0	0	0	0	0	0	0	0	0	0	0	0	0	0	0	0
IL23R	0	0	0	0	6	0	0	0	0	0	0	0	0	0	0	0	0	0	0	0	0	0	0	0
IL12RB2	251	333	349	354	271	329	256	274	312	331	317	291	386	257	258	247	223	342	299	318	324	324	335	417
SERBP1	50209	65368	50758	57658	61294	60519	50995	55743	53684	53566	45332	52063	59818	59397	56659	59067	66070	60438	58996	60068	58482	66894	58283	62053
GADD45A	571	740	946	1075	1603	1707	1565	1743	1938	1451	1317	1380	1717	1720	1561	1818	1615	1482	1512	1534	1380	1585	1234	1236
GNG12	3612	4276	3365	3418	4021	3680	3065	3359	3056	3363	2872	3414	3494	3818	3486	3083	4575	3775	3668	3691	3206	3768	3806	3749
GNG12-AS1	22	16	10	16	11	20	15	9	8	3	6	13	17	31	13	7	9	30	16	13	22	4	0	23
DIRAS3	4	19	0	6	18	5	6	2	0	10	4	10	0	7	0	12	0	0	18	1	10	6	14	14
WLS	4707	4981	2660	2448	2546	2402	1518	1848	2057	1604	1593	1752	2132	1737	1749	1920	2606	2030	2098	2058	2007	2298	1941	2338
MIR1262	0	0	2	0	0	0	0	0	0	0	0	0	0	0	0	0	0	0	0	0	0	0	0	0
RPE65	0	0	0	0	0	0	0	0	4	0	0	0	0	0	0	0	0	0	0	0	0	0	0	0
DEPDC1	7081	8940	7304	8486	9483	9005	7741	8839	8498	8817	7018	9390	9360	8582	9027	7826	10139	9187	8644	9361	8654	10798	9090	10262
DEPDC1-AS1	13	2	6	6	6	8	19	16	38	6	0	2	12	20	10	13	2	6	16	14	24	4	24	34
LRRC7	34	37	22	63	77	36	60	50	33	14	66	12	57	50	42	40	73	30	45	51	34	28	30	39
PIN1P1	2	8	0	0	0	0	0	0	0	0	0	0	0	0	0	0	0	0	0	0	0	0	0	0
LRRC40	2712	3175	2459	3334	3589	3016	2685	3053	3167	2997	2535	3022	3656	3383	3635	3480	3813	3573	3658	3713	3452	4263	3590	4228
SRSF11	11293	12531	10328	11777	12099	12102	9172	10143	11348	10055	10284	10859	11306	10684	11678	10865	13255	11371	12578	12044	12767	14583	12526	14645
ANKRD13C	2391	2607	2146	2523	2708	2747	2659	2733	2948	2702	2272	2719	3116	3065	3434	2903	3606	2932	3044	3050	3164	3552	3058	3326
ANKRD13C-DT	403	465	426	505	480	637	554	597	567	545	414	504	553	535	576	803	686	772	550	614	542	634	488	460
CTH	448	647	503	704	661	624	628	602	655	516	488	517	696	604	576	554	549	537	607	704	656	655	738	623
LINC01788	0	0	0	0	0	0	0	0	0	0	0	0	0	0	0	0	0	0	0	0	0	0	0	0
PTGER3	2	2	14	16	2	8	2	14	34	24	0	1	7	4	10	22	0	21	8	24	19	4	28	12
ZRANB2-AS1	34	34	71	44	48	35	73	71	91	50	72	65	44	65	63	32	38	54	70	49	64	123	132	83
ZRANB2	6827	7301	6296	6954	7724	7494	7070	7923	8556	7311	7130	7587	9036	7926	8918	9298	8974	8476	8563	8990	8915	10364	9425	9517
MIR186	12	7	13	12	12	8	15	10	15	11	26	15	14	7	18	12	10	6	18	24	10	9	8	15
ZRANB2-DT	16	12	0	4	22	6	31	12	12	23	8	19	28	4	11	29	4	12	8	3	13	23	13	4
NEGR1	2	12	8	10	16	12	12	16	40	24	2	8	22	12	4	4	4	6	4	6	2	12	6	16
NEGR1-IT1	0	0	0	0	0	0	0	0	0	0	0	0	0	0	0	0	0	0	0	0	0	0	0	0
LINC01360	0	0	0	0	0	0	0	0	0	0	0	0	0	0	0	0	0	0	0	0	0	0	0	0
LRRIQ3	132	191	101	117	140	157	145	202	158	177	154	194	181	119	172	299	210	159	215	181	191	163	162	206
FPGT-TNNI3K	0	0	0	0	0	0	0	0	0	0	0	0	0	0	0	0	0	0	0	0	0	0	1	0
FPGT	1248	1841	1533	1680	1837	1720	1806	2044	1928	1971	1441	1862	2007	1919	2086	1810	2408	2182	1856	2027	1936	2233	1991	2153
TNNI3K	0	0	0	0	0	0	0	0	0	0	0	0	0	0	0	0	0	0	0	0	0	0	0	0
	0	0	0	0	0	0	0	0	0	0	0	0	0	0	0	0	0	0	0	0	0	0	0	0
LRRC53	0	0	0	0	0	0	0	0	0	0	0	0	0	0	0	0	0	0	0	0	0	0	0	0
ERICH3	0	0	0	0	0	4	4	0	0	0	0	0	4	0	0	2	0	0	2	0	10	0	0	0
ERICH3-AS1	0	0	0	0	0	0	0	0	0	0	0	0	0	0	0	0	0	0	0	2	0	1	0	4
CRYZ	2082	2623	2133	2561	2689	2629	2235	2671	2523	2529	2195	2207	2625	2427	2667	2419	2928	2510	2423	2499	2372	3079	2274	2757
TYW3	3408	4422	3405	3328	4069	3572	2918	3022	3249	3451	2914	3657	3755	3606	3274	3631	4092	3856	3573	3653	3526	4220	4119	3872
LHX8	388	418	419	483	586	670	597	581	592	589	536	440	632	669	527	586	527	433	590	478	484	595	401	416
SLC44A5	811	781	702	840	774	763	812	815	809	742	719	728	952	786	899	797	1041	669	895	922	923	1005	845	914
ACADM	4183	4960	4159	5125	5418	5470	4850	5599	5742	5098	4202	4863	6030	5662	5753	5858	6274	5825	5895	5906	5342	6296	5702	6339
DLSTP1	462	518	357	459	505	422	424	380	418	356	397	410	507	502	440	423	501	555	591	477	422	583	597	525
RABGGTB	5104	5896	5343	6122	6342	5979	5150	6213	6396	5564	4788	5231	5690	5226	5701	6216	6034	5134	5089	5478	5343	5801	5200	5615
SNORD45C	28	11	14	11	13	10	13	14	26	7	2	25	27	27	9	16	19	7	9	15	29	9	10	28
SNORD45A	10	2	8	16	14	4	14	9	9	16	33	8	11	5	27	13	21	5	10	11	13	25	11	20
SNORD45B	16	20	34	17	15	25	9	41	55	21	31	11	43	21	13	21	9	18	27	10	30	45	19	42
MSH4	23	5	26	35	43	37	46	24	42	29	84	49	40	70	51	54	41	28	44	36	34	18	48	59
ASB17	0	0	0	0	0	0	0	0	0	0	0	0	0	0	0	0	0	0	0	0	0	0	0	0
LOC101927342	0	0	0	0	0	0	0	0	0	0	0	0	0	0	0	0	0	0	0	0	8	0	0	0
ST6GALNAC3	613	756	568	777	786	739	582	748	709	725	463	608	763	743	883	621	842	783	652	678	655	829	789	910
ST6GALNAC5	79	140	82	80	102	122	106	80	117	42	67	133	107	65	107	82	125	58	91	78	46	71	125	81
MIR7156	0	0	0	0	0	0	0	0	0	0	0	0	0	0	0	0	0	0	0	0	0	0	0	0
PIGK	4327	5505	4324	4934	5516	4990	3922	5322	4883	4750	3719	4250	5036	4739	4234	4610	5225	4915	4894	4676	4788	5792	4738	5530
AK5	70	114	71	93	76	99	62	90	78	77	72	70	125	52	90	109	78	79	110	89	66	101	111	88
ZZZ3	5460	6464	5107	6470	6877	6843	6047	7057	7028	6635	5717	7018	7978	7462	7217	6141	8122	7564	7041	7281	7253	9203	7706	8157
USP33	6563	7272	4605	5189	5223	5349	4040	4311	4309	4374	3897	4749	4674	4334	4539	4007	5575	5247	5384	4762	4651	5440	4862	5306
MIGA1	1800	2466	1784	2046	2509	2268	2220	2327	2894	2559	2125	2553	3042	3080	3273	2227	3128	3004	3230	3053	3316	3612	3458	3682
NEXN-AS1	9	16	8	15	15	15	11	3	4	8	12	12	31	18	10	7	15	9	28	12	12	6	26	23
NEXN	750	828	656	614	839	767	560	565	705	572	459	538	560	596	733	432	704	592	575	604	670	699	649	730
FUBP1	7700	9588	6917	7884	8001	8460	6552	6815	7149	7190	6776	7365	7654	7631	7418	7150	8751	8354	8200	8540	8072	9910	8862	9052
DNAJB4	1462	1847	1566	2113	2166	2258	2094	2242	2229	2532	1893	2466	2448	2257	2238	2211	2659	2260	2392	2403	2421	2668	2747	2535
GIPC2	22	26	24	30	46	32	26	24	63	15	49	32	34	27	12	48	38	52	26	18	10	26	26	46
MGC27382	1	4	2	0	0	0	4	0	0	0	3	0	0	2	0	0	0	0	0	0	0	5	0	0
PTGFR	0	32	21	10	6	36	6	26	36	26	4	16	10	11	44	18	20	14	28	14	58	38	20	23
IFI44L	16	23	10	22	22	24	14	6	9	6	0	12	22	8	0	0	30	0	16	4	6	0	20	8
IFI44	0	0	5	0	2	0	0	0	0	0	0	0	0	2	0	0	0	0	0	0	0	0	0	0
ADGRL4	0	0	0	0	8	0	0	0	0	0	0	0	0	0	0	0	0	0	0	0	0	0	0	0
LINC01781	0	0	0	0	0	0	0	0	0	0	0	0	0	0	0	0	0	0	0	0	0	0	0	0
ADGRL2	8076	9744	6912	8276	8894	8938	8285	8109	8343	8633	7217	8623	9793	8816	8354	6095	10104	9146	8858	9606	8975	10340	9289	9425
LOC101927434	0	0	0	0	0	0	0	0	0	0	0	0	0	0	0	0	0	0	0	0	0	0	0	0
LINC01361	8	0	4	18	12	14	8	2	0	12	15	6	0	6	2	10	0	0	0	4	3	0	0	0
LINC01725	2	6	2	15	3	5	3	0	15	8	0	8	12	1	0	6	2	10	13	10	13	7	0	2
LOC101927560	2	8	1	0	9	0	2	0	0	11	0	0	0	2	0	0	0	0	2	0	0	15	2	0
TTLL7	438	570	518	479	669	587	466	488	721	382	391	600	581	507	492	333	555	547	540	484	481	539	518	525
PRKACB	1924	2506	1735	2346	2313	2497	2134	2479	2296	2335	2178	2381	2706	2773	2573	2041	3049	2589	2753	2703	2580	3212	2807	2866
SAMD13	76	106	78	86	82	83	70	88	50	45	120	99	109	98	57	102	152	76	82	118	86	86	76	99
UOX	4	0	0	2	0	12	2	2	9	2	8	10	3	0	0	8	3	18	10	3	13	0	0	0
DNASE2B	0	0	0	0	0	0	0	0	0	0	8	0	3	0	0	0	0	0	0	0	0	0	0	0
RPF1	3604	5085	4489	5098	5953	5689	4903	5475	5627	5357	4838	5687	6373	6342	6793	7881	7506	6532	6705	7311	6955	7422	6591	7333
GNG5	3017	3702	3355	3682	4101	4077	3452	3822	3102	3199	3095	3185	4119	4113	3527	4713	4369	4033	3820	3821	3317	3900	3817	3927
SPATA1	3	18	11	28	22	12	5	7	18	3	14	4	12	20	15	14	42	11	12	20	19	16	15	8
CTBS	386	322	227	166	227	232	191	159	230	259	187	190	178	250	164	170	253	214	243	195	189	327	163	229
LINC01461	25	26	22	13	18	34	13	53	22	26	26	12	24	25	45	10	27	21	37	28	24	16	26	21
LINC01555	0	0	4	1	10	2	0	0	0	0	0	0	0	0	0	0	0	6	0	10	0	2	0	0
SSX2IP	4673	5743	4583	4850	5035	5290	4146	4803	4769	4313	4028	4817	5056	4497	4614	3660	5431	4695	4733	4735	4734	5317	4919	5164
LPAR3	1638	2041	1595	1707	1700	1763	1490	1426	1504	1321	1211	1326	1724	1501	1558	1273	1688	1564	1373	1329	1357	1612	1425	1455
MCOLN2	638	877	856	864	1003	890	784	760	960	836	706	938	890	881	1039	1010	908	760	923	891	1159	1195	677	964
MCOLN3	334	303	344	357	360	404	370	382	403	251	350	354	394	357	378	346	301	331	363	302	474	471	395	390
DNAI3	132	84	108	116	92	82	99	99	80	57	108	87	55	61	67	103	84	76	79	54	40	83	63	74
MIR4423	0	0	0	0	0	0	0	0	0	0	0	0	0	0	0	0	0	0	2	0	0	3	0	0
SYDE2	881	896	845	931	1123	948	943	859	945	714	632	859	872	758	698	459	907	727	753	810	930	1059	796	1120
C1orf52	2200	2803	2289	2921	3218	3150	2503	2758	2983	2818	2546	2799	3266	3390	3255	4359	3602	3231	3332	3147	3140	3617	3072	3303
BCL10	853	1232	1010	1252	1460	1482	1431	1643	1619	1342	1374	1410	1828	1724	1838	1898	1913	1655	1556	1892	1551	2069	1536	1705
BCL10-AS1	0	2	2	21	0	6	17	0	0	15	0	0	12	0	0	20	14	2	0	4	6	0	2	0
DDAH1	2305	2913	2283	2416	2446	2327	1870	1892	1794	1807	1834	2201	2240	2123	2218	1771	2432	2139	2059	2210	2007	2244	2344	2491
CCN1	265	433	402	629	850	905	1000	1072	1011	762	659	695	970	931	1040	960	942	861	717	932	802	806	705	796
ZNHIT6	4121	4763	3594	4314	4786	4404	3684	4389	4766	4260	4074	4830	5043	5187	4692	5255	5764	5618	5487	5279	4919	6051	5330	5888
COL24A1	72	61	36	34	40	71	58	54	51	32	61	34	21	31	30	34	51	18	26	36	76	22	28	38
ODF2L	947	897	927	1166	1105	1133	1151	1255	1283	1055	945	1374	1261	982	1134	902	1247	1000	970	1188	1172	1235	1089	1244
MIR7856	0	1	0	0	0	0	0	0	0	0	0	0	0	1	0	2	0	0	0	0	0	3	0	0
CLCA2	0	12	0	0	2	2	0	0	0	0	0	0	0	0	0	0	0	0	0	0	0	18	0	0
CLCA1	0	0	0	0	0	0	0	0	0	0	0	0	0	0	0	0	0	0	0	0	0	0	0	0
CLCA4	0	0	0	0	0	0	0	0	0	0	0	0	0	0	0	0	1	0	0	0	0	0	0	0
CLCA3P	0	4	1	0	0	0	0	0	0	0	0	0	0	0	0	0	0	0	0	0	0	0	0	0
CLCA4-AS1	11	8	18	34	30	19	37	48	50	6	6	38	32	44	39	39	36	44	29	28	46	42	22	59
SH3GLB1	5188	6837	4531	5421	6193	5440	4711	5127	5172	5054	4645	5685	6188	5643	5382	5253	6983	5991	6123	6395	5483	6897	6055	6494
SELENOF	8513	11262	8989	10761	12397	11564	10494	11321	11986	10780	9280	11272	12624	12000	12661	14113	14173	12116	13013	12963	12381	14371	13231	13244
HS2ST1	5612	7276	5419	6048	6659	6381	5150	5670	5538	5242	4596	5622	6256	5886	6255	4882	7390	6141	6223	6232	5901	6874	6270	6871
LINC01140	8	33	16	15	44	63	39	33	23	23	42	35	78	38	14	45	30	40	81	76	45	103	84	30
LINC02801	2	0	0	0	0	0	0	0	0	0	0	0	0	0	0	0	0	0	0	0	0	2	0	0
	0	0	0	0	0	0	0	0	0	0	0	0	0	0	0	0	0	0	0	0	0	0	0	0
LMO4	3002	4004	2900	3269	3538	3449	2752	3016	3157	2962	2935	3012	3599	3365	3375	3477	3420	3217	3111	3133	3101	3267	3075	3256
LINC01364	0	0	0	2	1	0	2	0	0	0	0	0	0	0	0	0	0	0	4	2	0	0	0	0
PKN2-AS1	2	10	0	8	10	12	4	14	0	16	13	9	20	10	14	3	0	6	12	21	27	38	0	20
PKN2	6398	7695	6244	6652	6286	6760	5752	6176	6176	5823	5185	6275	6782	6500	6833	4977	7311	6652	7190	7151	7066	7978	7014	7721
GTF2B	1633	1885	1545	2144	2630	2347	2258	2675	2668	2494	2266	2738	3050	3345	3435	3945	3777	3350	3563	3426	3582	3954	3475	3851
KYAT3	1463	1649	1031	1041	998	1007	821	924	926	750	818	858	1028	796	1006	1014	1064	900	877	846	895	1035	930	959
RBMXL1	2931	3727	2864	3255	3420	3624	3000	3595	3551	3584	2987	3267	3816	3640	3683	3481	4353	3540	3327	3562	3260	3741	3606	3194
GBP3	4	5	4	0	4	2	13	0	0	3	2	0	15	5	2	5	0	0	2	6	1	0	8	0
GBP1	0	7	0	0	0	0	3	1	6	0	0	0	3	0	0	0	4	4	0	0	0	1	0	0
GBP2	0	3	0	0	0	10	0	4	8	10	0	2	0	6	6	20	14	11	5	9	1	27	26	0
GBP7	2	0	1	0	4	0	0	4	0	0	0	0	0	0	0	0	0	0	0	0	0	0	0	0
GBP4	0	0	0	0	0	0	0	0	0	0	0	0	0	0	0	0	0	0	0	0	0	0	0	0
GBP5	0	0	0	0	0	0	0	0	0	0	0	0	0	0	0	0	0	0	0	4	0	0	0	0
LOC729930	4	0	0	8	0	0	6	0	0	4	0	0	8	2	0	10	2	0	0	0	0	0	2	4
GBP6	6	8	6	8	0	0	2	2	2	0	0	0	2	0	0	0	0	0	0	0	2	6	12	0
GBP1P1	58	44	37	49	86	55	22	49	27	70	22	64	41	32	22	12	62	37	46	59	28	40	34	11
LRRC8B	1945	2242	1858	1986	2167	2256	2079	2341	2484	2466	1917	2530	2607	2694	2740	1844	3032	2387	2716	3005	2632	2992	2528	2924
LRRC8C	2339	2314	1477	1522	1394	1704	1351	1426	1587	1366	1472	1673	1761	1563	1648	1055	2040	1925	1781	1625	1577	2104	1795	1888
LRRC8C-DT	19	10	15	21	14	5	23	17	10	12	16	27	27	36	14	11	42	17	16	11	19	25	14	2
LRRC8D	1116	1742	1329	1448	1419	1653	1559	1679	1486	1543	1390	1565	1871	1698	2027	1524	2001	1727	1472	1799	1615	2045	1637	1626
	0	0	0	2	0	0	0	0	0	0	0	0	0	2	1	0	0	0	0	0	0	0	0	0
GEMIN8P4	205	183	136	187	213	188	180	309	153	193	183	206	209	219	153	209	275	223	187	174	214	119	194	277
ZNF326	4379	5247	4399	4852	5847	5766	4900	5938	5715	5661	4700	5502	6466	6070	5878	6418	7257	6559	5537	6643	6283	6575	6822	6776
BARHL2	160	203	161	198	143	234	228	189	281	167	155	196	261	213	204	206	230	272	249	263	175	242	120	210
ZNF644	5298	6302	4497	5519	6665	6171	5760	7033	7193	6421	6029	6743	8288	7967	7893	5837	9455	7331	7821	7799	7628	8957	8238	8820
HFM1	94	47	43	89	85	75	69	89	76	50	50	45	90	98	66	84	102	66	62	52	78	93	24	26
CDC7	6297	7329	5519	6622	6849	7200	6094	7121	7709	7126	6107	7389	8832	8323	8371	7353	9438	8028	8172	8457	8084	9222	8511	8938
TGFBR3	2562	2792	1524	1774	1709	1969	1473	1653	1688	1639	1289	1821	1765	1633	1542	924	2161	1948	1810	1570	1701	2016	1864	1897
BRDT	0	2	0	0	0	4	0	0	0	0	0	0	0	0	0	0	0	0	0	0	0	0	0	0
EPHX4	251	251	237	293	313	308	129	194	282	155	189	212	319	251	173	255	212	253	268	245	262	337	171	261
SETSIP	142	263	114	148	81	143	98	99	76	140	119	89	106	138	107	129	245	125	154	126	92	164	115	201
BTBD8	50	52	38	96	46	44	72	77	62	46	48	50	98	71	82	15	48	42	61	60	35	75	60	52
	216	163	168	160	211	283	264	316	275	214	212	210	287	279	226	221	206	180	275	205	124	272	188	154
C1orf146	0	0	1	0	6	3	0	0	4	4	2	2	2	0	0	7	6	2	7	5	0	4	3	0
GLMN	1713	1850	1571	2023	2073	1928	1783	1950	2104	1810	1670	2149	2335	2215	2232	2352	2125	1927	1882	1994	2389	2621	1883	2531
RPAP2	1973	2362	2143	2457	2627	2626	2367	2976	2766	2791	2460	2817	3193	3447	3431	3536	3815	3495	3415	3550	3398	3847	4034	3927
GFI1	520	492	353	638	569	544	488	582	648	612	423	501	771	673	766	701	654	618	654	754	714	838	604	695
EVI5	1880	1971	964	1082	1239	1199	815	1051	933	1111	1003	1283	984	1049	1012	883	1402	1303	1230	1034	1391	1324	1275	1396
RPL5	66866	81387	57980	62734	68773	65902	50137	56968	55365	52623	46667	50950	57829	54992	53338	77606	64939	58078	54700	56948	54674	63418	56110	59670
DIPK1A	1026	1426	1120	1243	1505	1434	1109	1313	1379	1235	1278	1384	1625	1544	1323	1374	1519	1522	1423	1490	1365	1624	1519	1646
SNORD21	4	14	2	9	20	11	7	0	10	1	5	2	7	20	0	8	6	6	0	3	0	0	9	9
SNORA66	17	41	13	27	25	17	20	25	10	19	9	9	40	39	12	51	33	13	23	28	35	25	33	32
MTF2	4565	5834	4547	5556	6447	6580	5923	6359	7121	6489	5784	6994	7906	7336	7198	5934	7715	6737	7089	7180	7188	7848	7182	8138
TMED5	8576	10686	7523	7850	8049	7593	6055	6390	6191	6234	5366	7391	7647	6910	6905	6594	9178	7918	8041	8250	7741	9335	8411	9456
CCDC18	1213	1272	1270	1309	1531	1493	1486	1433	1563	1260	1276	1451	1756	1299	1516	1191	1446	1259	1381	1397	1366	1613	1297	1336
CCDC18-AS1	181	129	138	147	240	133	236	214	263	137	219	183	244	271	205	181	200	163	195	231	228	198	160	169
DR1	7815	9456	6027	6465	7449	7505	5718	5781	6298	5882	5954	6837	7067	6632	6524	6806	8783	7837	7275	7531	6593	8455	7529	8229
FNBP1L	2288	2512	1901	2271	2326	2360	2216	2335	2487	2523	2205	2518	2775	2534	2603	2260	2893	2708	2536	2441	2552	3108	2847	2855
	0	4	3	2	2	0	0	5	7	0	4	0	0	2	1	1	0	0	0	0	0	0	2	0
BCAR3	467	464	323	323	363	397	353	362	323	349	407	270	426	393	302	474	543	430	457	480	264	421	380	365
BCAR3-AS1	2	0	0	5	0	4	0	0	0	2	5	5	12	1	0	0	0	1	0	2	0	0	0	0
MIR760	1	0	0	0	0	2	2	1	0	6	0	5	0	0	2	2	3	0	0	0	0	0	0	0
TRR-TCT1-1	0	0	0	0	5	0	4	0	3	0	0	2	3	3	9	0	1	4	2	0	4	9	2	0
DNTTIP2	5690	4752	2163	2237	2326	2376	1769	1653	1888	1969	1787	2800	2491	2331	2063	2819	3448	2930	2800	2703	2806	3576	3379	3743
GCLM	3096	4108	3327	3779	4192	3837	3171	3449	3547	3447	3041	3671	3838	3708	3401	3270	4311	3332	3672	3315	3179	3938	3381	3641
ABCA4	0	2	0	2	0	0	8	0	0	0	0	0	0	0	0	0	0	0	0	0	0	0	0	0
ARHGAP29	1855	2015	1512	1731	1974	2247	1495	1707	1680	1932	1360	2070	2404	1871	2111	1463	2472	1939	1905	1976	1954	2447	2248	2259
ABCD3	6001	5759	2832	2900	3058	3145	2435	2531	2666	2657	2305	3215	3049	2678	2714	2508	3843	3236	3406	3250	3381	3796	3681	3934
F3	82	125	146	143	169	167	172	142	165	110	121	84	179	167	109	106	144	114	93	118	112	110	192	198
SLC44A3-AS1	16	21	17	8	20	35	20	13	34	4	0	16	14	25	14	18	19	16	14	32	10	18	10	15
MIR378G	0	0	0	0	0	0	0	0	0	0	0	0	0	0	0	0	0	0	0	0	0	0	4	0
SLC44A3	163	135	71	97	122	111	155	111	114	74	44	121	122	89	105	58	124	80	116	124	77	73	186	81
CNN3	8124	10159	7666	8436	9235	9554	7764	7926	8494	7611	6758	7510	8605	8142	8096	8926	9735	8863	8470	8372	7928	9669	8527	8885
	16	12	10	9	9	16	0	2	4	1	0	13	18	10	9	1	4	4	13	12	8	11	8	0
CNN3-DT	84	81	99	93	73	99	73	77	116	104	45	110	107	82	78	93	76	74	82	87	71	117	47	73
ALG14	707	945	918	1212	1148	1153	997	1193	1169	1012	854	1077	1301	1123	1051	1479	1265	1159	1278	1322	1181	1501	1313	1178
ALG14-AS1	0	0	0	0	7	0	0	0	0	0	0	0	0	0	3	0	0	0	0	0	8	0	0	0
TLCD4	980	1143	822	761	1029	995	786	883	837	788	658	992	995	877	942	703	1095	881	823	786	874	1005	1159	939
TLCD4-RWDD3	11	12	3	21	19	14	25	15	38	32	10	27	33	19	27	12	52	19	14	25	23	51	28	6
RWDD3-DT	4	6	0	2	6	0	0	8	0	0	0	5	6	6	2	2	0	0	8	4	12	0	0	0
RWDD3	284	333	368	386	400	399	384	554	396	439	335	427	518	519	450	631	419	454	464	471	448	536	502	442
LINC01761	0	0	0	0	0	0	0	0	0	0	0	0	0	0	0	0	0	0	0	0	0	0	0	0
LINC02607	0	0	0	0	0	0	0	0	0	0	0	0	0	0	0	0	0	0	0	0	0	0	0	0
LINC02790	0	0	0	0	0	0	0	0	0	0	0	0	0	0	0	0	0	0	0	0	0	0	0	0
LINC01787	0	0	0	0	0	0	0	0	0	0	0	0	0	0	0	0	0	0	0	0	0	0	0	0
PTBP2	1340	1505	1268	1605	1928	1522	1425	1686	1852	1675	1582	1677	2131	1880	2163	2132	2270	1930	1919	2172	2148	2346	2215	2224
DPYD	65	117	76	107	97	92	79	86	44	80	66	104	105	77	75	71	114	68	55	75	40	141	99	79
DPYD-AS1	0	0	0	0	0	0	0	0	0	0	0	0	0	0	0	0	0	0	0	0	0	0	0	0
DPYD-AS2	0	0	0	0	0	0	0	0	0	0	0	0	0	0	0	0	0	0	0	0	0	0	0	0
MIR137HG	0	0	0	0	0	0	0	0	0	0	0	0	0	0	0	0	0	0	0	0	0	0	0	0
MIR2682	0	0	0	0	0	0	0	0	0	0	0	0	0	0	0	0	0	0	0	0	0	0	0	0
MIR137	0	0	0	0	0	0	0	0	0	0	0	0	0	0	0	0	0	0	0	0	0	0	0	0
LINC01776	0	0	0	0	0	0	0	0	0	0	0	0	0	0	0	0	0	0	0	0	0	0	0	0
SNX7	1627	1195	628	516	653	503	366	354	377	491	340	562	471	457	449	485	563	505	526	591	573	701	585	573
PLPPR5	15	14	16	18	8	15	27	35	2	0	2	22	26	16	28	41	18	14	14	2	16	27	24	28
PLPPR5-AS1	0	0	0	0	0	0	0	0	0	0	0	0	0	0	0	0	0	0	0	0	0	0	0	0
PLPPR4	86	86	86	112	91	88	92	58	86	71	94	96	96	84	52	40	121	87	110	128	52	76	80	60
LINC01708	0	0	0	0	0	0	0	0	0	0	0	0	0	0	0	0	0	0	0	0	0	0	0	0
PALMD	40	44	33	62	71	50	38	59	56	23	30	26	49	20	28	75	36	32	42	46	29	46	34	75
FRRS1	846	1140	933	1056	1123	1274	1062	1180	1300	974	981	1033	1349	1188	1212	806	1324	1291	1035	1040	1039	1336	1173	1094
AGL	5073	4487	2075	2130	2193	2052	1757	1988	2143	1744	1514	2095	2013	1867	1954	1378	2222	1889	1815	2257	1759	2561	2176	2465
SLC35A3	1667	1986	1638	1858	2014	1842	1614	1822	1952	1583	1551	1885	1898	1784	1779	1647	2084	1580	1814	1939	1949	2641	1992	2101
MFSD14A	3234	3886	3266	3535	4014	4242	3529	4155	4143	3909	3253	4144	4806	4691	4866	4166	5023	4701	4894	4635	4523	5747	4973	5014
SASS6	2465	3228	2698	3269	3601	3590	3384	3547	3687	3717	3439	3807	4389	3827	4052	3333	4159	3466	3977	3829	3845	4293	3775	3810
TRMT13	1089	1442	1284	1389	1597	1463	1392	1625	1831	1464	1166	1453	1655	1496	1678	1519	1537	1534	1539	1432	1486	1808	1453	1883
LRRC39	51	18	72	59	47	65	73	84	84	51	135	61	80	93	108	106	68	53	54	52	43	88	48	77
DBT	3461	3477	1901	1876	2141	1934	1759	2047	1973	2073	1641	2323	2084	2213	1977	1487	2542	2325	2175	2265	2227	2819	2352	2868
RTCA-AS1	34	35	18	45	24	31	46	45	60	9	20	45	64	51	68	46	52	26	28	50	44	32	52	10
RTCA	2537	3490	2861	3083	3508	3283	3111	3359	3030	3064	2727	3235	3593	3507	3549	3843	4163	3754	3649	3767	3320	4295	3423	3540
MIR553	0	1	0	0	1	4	1	3	8	0	5	0	0	0	5	0	0	0	1	6	0	0	0	0
CDC14A	1333	1540	1326	1664	1777	1882	1808	1695	1985	1702	1450	1645	1840	1971	1709	1681	2092	1777	1730	2066	1788	2095	1787	1737
GPR88	2	16	0	7	16	8	0	1	0	4	6	20	2	7	16	26	12	10	29	5	14	0	6	0
LINC01349	0	0	0	0	0	0	0	0	0	0	0	0	0	0	0	0	0	0	0	0	0	0	0	0
VCAM1	0	0	0	0	0	0	0	0	0	0	0	0	0	0	0	1	0	0	0	0	2	0	0	0
EXTL2	1668	1831	1687	1800	1845	1969	1591	1567	1586	1424	1448	1707	1865	1648	1863	1648	2059	1503	1677	1597	1630	1833	1552	1761
SLC30A7	1679	2362	1817	2326	2864	2571	2725	3097	3356	2915	2593	3145	3757	3881	3623	3029	3925	3542	3778	3643	3764	4435	3965	3970
DPH5	2430	3024	2632	2710	3381	2784	2459	3029	2961	2790	2599	2691	3319	3393	3304	3752	3979	3292	3118	3366	3215	3671	3396	3404
DPH5-DT	274	327	222	253	224	320	227	273	305	295	379	295	410	348	411	470	300	450	465	343	454	466	358	307
LOC101928334	0	0	0	0	0	0	0	0	0	0	0	0	0	0	0	0	0	0	0	0	4	0	0	0
S1PR1-DT	2	6	2	10	0	0	4	0	6	0	0	0	0	2	1	0	0	0	4	16	0	16	16	0
S1PR1	153	172	207	194	246	238	164	229	87	144	182	124	175	194	210	127	150	146	149	176	97	133	105	141
LINC01307	0	0	0	0	0	0	0	0	0	0	0	0	0	0	0	0	0	0	0	0	0	0	0	0
OLFM3	0	6	0	2	0	0	2	2	0	0	0	3	0	0	4	2	0	8	0	0	0	0	0	0
DNAJA1P5	0	0	0	0	0	0	0	0	0	0	0	0	0	0	0	0	0	0	0	0	0	0	0	0
COL11A1	32	26	29	37	37	24	34	28	11	54	14	26	31	29	20	10	14	13	34	14	34	46	12	32
RNPC3-DT	2	0	0	4	20	12	0	6	0	0	2	2	3	0	0	0	1	2	0	1	0	0	0	0
RNPC3	836	725	826	763	821	1021	847	897	965	857	839	1009	1046	780	1149	845	1067	1030	852	891	969	975	766	898
AMY2B	70	35	75	85	103	88	95	91	89	107	104	110	115	103	107	163	107	94	116	64	109	139	105	96
ACTG1P4	0	1	4	20	3	0	12	6	2	15	0	4	4	2	2	14	0	8	0	24	8	6	16	18
AMY2A	1	0	0	0	0	0	0	0	0	0	0	0	2	0	0	0	0	0	0	0	0	0	0	0
AMY1A	0	0	0	0	0	0	0	0	0	0	0	0	0	0	0	0	0	0	0	0	0	0	0	0
AMY1B	0	0	0	0	0	0	0	0	0	0	0	0	0	0	0	0	0	0	0	0	0	0	0	0
AMY1C	0	0	0	0	0	0	0	0	0	0	0	0	0	0	0	0	0	0	0	0	0	0	0	0
LOC100129138	0	2	0	0	0	0	0	0	0	0	2	4	2	6	0	4	0	6	0	6	0	0	0	2
LINC01676	0	0	0	0	0	0	0	0	0	0	0	0	0	0	0	0	0	0	0	0	0	0	0	0
PRMT6	3762	4436	3597	3745	4379	4100	3533	3687	4131	3744	3574	3699	4696	4529	4735	4552	5568	4616	4763	5063	5082	5283	4613	4884
NTNG1	10	6	14	22	6	4	8	4	6	5	11	0	16	15	8	8	6	20	10	14	2	25	18	20
VAV3	386	496	377	374	540	352	415	455	476	460	399	476	504	503	481	333	382	431	433	385	449	367	364	494
MIR7852	0	0	0	0	0	0	0	0	0	0	0	0	0	0	0	0	0	0	0	0	0	0	0	0
VAV3-AS1	0	0	0	0	0	0	0	0	0	0	0	0	0	0	0	0	2	0	0	0	0	0	0	0
SLC25A24	2742	3119	2325	2906	2787	2617	2155	2360	2377	2298	1923	2130	2340	2274	2195	2345	2665	2347	2080	2276	2170	2779	2144	2218
NBPF4	0	0	0	0	0	0	0	0	0	0	0	0	0	0	0	0	0	0	0	0	0	0	0	0
NBPF6	0	0	0	0	0	0	0	0	0	0	0	0	0	0	0	0	0	0	6	0	0	0	0	0
EEIG2	2025	2608	1827	2042	2109	2088	1795	1785	2055	1799	1657	1720	2126	1955	1948	1397	2007	1950	1947	2019	2037	2528	1771	2151
HENMT1	0	1	0	0	0	0	0	0	0	0	0	0	0	4	0	0	0	0	0	0	0	0	0	0
PRPF38B	6135	7571	6453	7584	8250	8107	6636	6860	7612	6843	6523	7095	7385	7235	7004	7233	8766	7185	7614	7627	7750	7949	7876	8539
FNDC7	0	0	0	4	0	0	11	0	0	0	0	0	4	4	0	0	10	0	6	8	5	0	12	10
STXBP3	2909	3272	3182	3580	3893	3981	3334	3872	3967	3658	3044	3666	4206	4070	4587	4190	4804	4337	4234	4408	4201	4817	3862	4840
AKNAD1	0	0	0	0	0	0	0	0	0	0	0	0	0	0	0	0	0	0	0	0	0	2	0	6
SPATA42	1	0	0	0	0	0	0	0	0	0	0	0	0	0	0	0	0	0	0	0	0	0	0	0
GPSM2	1601	1796	1440	1381	1718	1497	963	1068	1086	982	998	1122	1074	1076	1229	1023	1370	1204	1129	1111	1016	951	1151	1183
CLCC1	2958	3584	2889	3044	3425	3349	2631	2954	3436	2886	2399	3099	3513	3314	3272	3287	4156	3533	3549	3810	3916	4340	3568	4092
WDR47	1320	1346	906	932	1076	1053	1087	1039	1234	1047	1075	1171	1216	1205	1293	1038	1243	1285	1273	1220	1286	1486	1457	1218
TAF13	883	1175	1029	1007	1199	1247	1130	1218	1464	1210	1123	1350	1419	1589	1468	1480	1631	1655	1599	1665	1611	1929	1630	1720
TMEM167B	1206	1265	1275	1510	1992	1828	1742	2131	2124	1920	1761	1795	2301	2312	2365	2390	2318	2324	2255	2134	2137	2624	2353	2542
SCARNA2	22	39	12	26	31	16	30	14	6	8	4	18	19	20	44	9	14	35	24	19	26	20	20	22
CFAP276	6	3	7	9	4	2	5	3	8	1	4	6	15	3	4	12	2	4	1	10	26	1	2	2
ELAPOR1	6	4	2	3	0	4	0	3	0	2	8	0	11	6	0	0	18	10	6	2	12	11	10	12
SARS1	10235	13090	10647	12241	13500	13379	11491	11847	12864	11167	10644	11173	13049	12685	12216	15833	14737	13729	12763	13035	12772	14538	13281	13432
CELSR2	3441	2611	1386	1368	1245	1414	990	1036	1248	1032	1305	1269	1302	1169	1129	844	1730	1360	1635	1257	1353	1658	1369	1557
PSRC1	2264	2699	1948	1949	2412	2668	1925	1949	2041	2243	1834	2101	2493	2025	2159	2734	2716	2431	2061	2155	2144	2542	2285	2179
MYBPHL	0	0	0	0	0	0	0	0	0	0	2	0	0	4	0	8	0	0	0	0	0	0	0	0
SORT1	4903	5568	3430	3452	3493	3491	2564	2577	2666	2210	2141	2763	2716	2488	2324	2027	3106	3009	2949	2837	2921	3537	3173	3491
PSMA5	7184	9468	7636	9321	10081	9731	8893	9626	9616	9189	7955	8003	10249	10043	10281	13720	11419	10270	10270	11097	10085	12380	10742	10848
SYPL2	663	653	468	445	484	691	311	385	539	516	355	631	487	427	483	485	567	513	517	603	457	640	441	620
ATXN7L2	728	762	611	821	948	1142	1086	951	1140	980	1254	1123	1253	1382	1493	1632	1546	1397	1324	1367	1033	1371	1175	1233
CYB561D1	717	741	665	776	857	874	790	889	884	823	845	954	1136	953	906	853	1105	906	972	927	866	984	779	851
AMIGO1	589	742	619	700	687	823	811	803	835	988	740	743	1004	1031	1071	1063	1100	903	1069	855	823	1127	938	908
GPR61	0	0	10	22	8	0	16	15	2	9	0	40	19	11	0	0	4	2	0	12	2	0	0	0
GNAI3	6753	7786	5458	5590	5712	5512	4391	4640	4794	5041	4442	5109	5444	5540	5143	5570	6702	5878	5621	6154	5388	6729	6327	6450
MIR197	12	0	0	2	8	0	2	9	0	0	0	0	0	2	2	0	0	2	4	0	2	0	0	0
GNAT2	39	58	51	31	66	43	41	32	59	26	42	60	74	46	69	23	68	40	28	57	80	62	82	65
AMPD2	4059	4637	3417	4066	4241	4786	4277	3943	4801	3612	4136	3973	4684	3827	4636	5145	4731	4399	4884	4398	4674	5030	3837	4332
GSTM4	301	352	117	153	119	135	130	107	167	128	102	171	119	145	101	177	126	92	127	162	120	150	78	124
GSTM2	718	779	426	537	413	461	386	328	349	277	314	291	275	279	266	394	509	336	299	391	305	456	250	259
GSTM1	5	18	9	3	2	6	0	1	15	4	6	0	5	4	5	6	12	10	5	4	1	11	0	6
GSTM5	0	0	0	0	0	0	0	0	0	0	0	0	0	0	1	0	0	0	0	0	0	6	0	2
GSTM3	2044	2517	1855	2822	2807	2645	2401	2392	2647	2429	2010	2564	2796	2628	2660	3601	2881	3042	2711	2956	2653	3281	2699	2968
EPS8L3	0	0	0	0	0	0	0	2	0	0	0	0	0	0	0	0	0	0	0	0	0	0	0	0
CSF1	315	339	280	340	386	443	450	434	445	299	318	367	476	463	421	488	475	427	379	437	498	522	337	363
AHCYL1	7582	9620	7701	7902	8321	8045	6990	6987	7111	6415	6255	7388	7523	7115	7435	5937	8250	7555	7343	7620	7035	8617	6826	7980
STRIP1	2313	2530	1960	2176	2400	2363	2282	2247	2263	2130	2016	2199	2481	2550	2811	2363	2657	2573	2826	2974	2746	3033	2655	2923
ALX3	217	192	119	166	255	160	152	127	138	170	126	215	168	202	209	180	180	178	166	153	207	125	190	182
LINC01397	5	5	6	5	0	2	9	6	13	11	4	8	8	13	6	0	0	0	2	0	4	6	3	2
UBL4B	0	2	0	0	0	0	4	0	0	2	0	0	2	8	1	0	0	8	2	0	0	0	0	0
SLC6A17	73	28	68	50	28	43	48	54	31	52	42	63	60	44	87	92	64	105	63	70	50	76	84	86
KCNC4-DT	55	33	25	13	9	36	14	30	30	13	22	21	56	24	19	57	18	45	24	27	34	46	33	30
KCNC4	876	1018	687	778	899	948	733	700	965	888	844	894	908	877	686	807	912	957	901	770	731	1115	778	828
RBM15-AS1	65	101	46	83	92	118	48	122	102	88	153	85	93	116	102	144	139	118	118	41	128	144	87	131
RBM15	2433	2766	2351	2987	3143	3307	2893	2825	3253	2929	2898	3350	3639	3759	4036	3420	4467	4100	4137	4476	4152	5162	4234	4614
SLC16A4	79	91	95	77	56	77	128	75	110	69	76	95	131	114	77	103	90	86	108	110	79	116	72	91
LAMTOR5	2952	3711	3282	3369	4044	3934	3442	3827	3542	3488	3037	3125	4227	4244	4192	5477	4424	4344	4401	4592	4144	5096	4341	4567
LAMTOR5-AS1	18	19	2	10	23	17	19	30	21	30	28	24	8	17	54	33	24	30	14	29	26	46	34	32
PROK1	0	0	0	0	0	4	4	8	16	4	0	0	12	10	0	4	0	0	6	4	4	2	0	4
CYMP	0	0	0	0	0	0	0	0	0	0	0	0	0	0	0	0	0	0	0	0	0	0	0	0
CYMP-AS1	0	0	0	0	0	1	0	0	0	0	0	0	0	0	0	0	0	0	0	0	0	0	0	0
KCNA10	0	0	0	0	0	0	0	0	0	0	0	0	0	0	0	0	0	0	0	0	0	0	0	0
KCNA2	6	10	3	22	26	13	6	36	60	12	12	10	36	26	14	25	6	20	28	0	18	23	10	44
KCNA3	96	118	65	117	108	95	84	72	108	98	103	139	104	136	126	64	170	82	143	115	110	139	101	211
CD53	0	0	0	0	0	0	0	0	0	0	0	0	0	0	0	1	0	0	0	0	0	0	0	0
LRIF1	1092	1506	1031	1164	1545	1380	1312	1504	1606	1357	1427	1723	1748	1732	1723	1521	1752	1671	1638	1708	1541	1981	1968	1882
DRAM2	1766	2049	1677	2119	2032	2191	1827	1799	1678	1547	1381	1956	2009	1742	1623	1960	2067	1756	1757	1748	1670	2010	1691	1562
CEPT1	2740	3452	2438	3145	3362	3260	2448	2798	2878	2821	2694	3021	3075	3065	3167	3178	3683	3170	3003	3106	2752	3336	3190	3565
DENND2D	4	1	0	15	0	1	8	4	10	8	0	21	17	2	20	0	0	7	4	4	3	10	4	6
CHI3L2	0	0	0	2	0	0	0	0	0	0	0	0	0	4	0	0	0	0	0	0	0	0	0	0
CHIAP2	0	0	0	0	0	0	0	0	0	0	0	0	0	0	0	0	0	0	0	0	0	0	0	0
CHIA	0	0	0	0	0	0	0	0	0	0	0	0	0	1	0	0	0	0	0	0	0	0	0	0
CIMAP3	24	23	8	12	21	29	38	6	40	25	22	20	27	36	33	27	14	4	36	30	12	17	50	31
PGBP	0	0	0	0	0	0	0	0	2	0	0	0	0	0	0	0	0	0	0	4	0	0	0	0
OVGP1	85	29	88	63	84	89	84	90	55	113	132	69	155	103	111	157	168	96	155	151	123	115	129	182
WDR77	12580	16247	13261	15167	16129	16095	13261	14291	15191	13714	13221	13038	15811	14771	15197	17864	18022	15486	15847	15536	14866	18439	15483	15688
ATP5PB	14869	19756	16048	18484	19974	19460	16486	19191	18702	17765	14600	17596	19526	19450	19475	24907	22827	19582	19147	20506	18441	22207	20477	21369
C1orf162	43	18	11	33	21	49	31	49	73	30	23	31	19	31	35	59	42	19	32	46	17	65	39	28
TMIGD3	0	0	0	8	0	6	0	0	0	0	0	0	6	0	0	0	0	0	0	0	0	0	0	0
ADORA3	0	0	0	0	0	0	0	0	0	0	0	0	0	0	0	0	0	0	0	0	0	0	0	0
LINC01160	8	0	2	0	0	2	2	3	8	0	2	2	2	10	7	17	10	4	12	0	7	0	4	0
RAP1A	3556	4277	3075	3354	4212	3772	2863	3487	3151	3001	3133	3418	3829	3340	3429	4136	4284	3744	3842	3840	3423	4165	3609	3966
INKA2	348	281	205	308	231	350	298	244	351	248	285	290	364	313	358	304	256	269	369	257	294	307	309	260
INKA2-AS1	6	1	2	10	12	6	2	9	10	0	23	9	2	5	0	5	2	8	4	13	6	4	0	19
LOC101928718	2	1	0	4	0	5	14	4	0	3	0	1	11	0	0	4	0	10	0	1	2	6	0	0
DDX20	3370	4459	3678	4793	5657	5747	5847	7098	7227	6587	6215	6884	9024	8889	9057	8357	10005	8523	9030	9866	8741	10305	8637	9928
KCND3	24	6	6	4	6	18	20	2	0	6	18	0	0	14	7	11	14	6	2	21	6	16	6	6
KCND3-IT1	0	0	0	0	0	0	0	0	0	0	0	0	0	0	0	0	0	0	0	0	0	0	0	0
KCND3-AS1	0	0	0	0	0	0	0	0	0	0	0	0	0	0	0	0	0	0	0	0	0	0	0	0
LINC01750	0	0	0	0	0	0	0	1	0	0	0	0	0	0	0	0	0	0	0	0	0	6	0	0
CTTNBP2NL	1811	2349	1770	2154	2331	2223	2130	2433	2592	2526	2265	2615	3016	2764	2664	1998	2786	3042	2793	2643	2620	3042	2838	3206
MIR4256	1	4	0	0	0	0	0	0	0	0	0	0	6	1	0	1	0	0	0	0	0	2	0	4
WNT2B	72	60	72	72	85	76	102	69	65	51	50	77	76	61	61	70	105	49	95	82	82	139	54	70
ST7L	985	1076	952	1127	1397	1328	1025	1287	1336	1189	968	1138	1436	1385	1403	1381	1305	1511	1396	1378	1392	1500	1633	1495
CAPZA1	11853	15243	11723	13493	14385	13595	11892	12727	12756	12021	10316	12567	13536	12999	13682	13757	15890	14059	13290	14364	13371	15941	14888	14743
MOV10	4002	4125	2830	3302	3262	3657	2772	2819	3095	2578	2597	2947	3116	2455	2723	3033	2997	2766	3010	2846	2506	3161	2497	2688
RHOC	2714	3422	2388	2532	2723	2739	2085	2215	2645	2129	1817	2112	2363	2402	2083	3218	2639	2663	2460	2267	2308	2378	2282	2204
PPM1J	259	246	173	94	113	113	89	105	68	81	106	108	97	82	93	98	94	92	113	76	112	142	41	86
TAFA3	2	0	0	0	0	6	2	0	0	0	0	0	0	0	0	0	0	4	6	0	0	8	0	16
LINC01356	27	16	1	12	0	14	8	6	11	1	0	20	8	15	12	20	15	24	0	11	26	2	0	28
SLC16A1	19938	26509	21940	25385	26015	26935	22656	24989	24696	24413	20473	24275	28235	28133	28232	25781	32548	29006	29452	29777	28393	32668	30718	30393
AKR7A2P1	22	34	18	6	26	8	22	11	12	18	0	14	13	32	35	6	6	2	24	10	8	21	33	2
SLC16A1-AS1	152	167	179	285	205	226	216	235	198	215	190	176	280	230	277	183	202	129	162	206	163	168	130	240
LRIG2-DT	6	9	12	18	50	15	19	29	28	12	16	23	24	19	16	19	25	12	6	22	9	12	16	6
LRIG2	1023	1246	1095	1313	1318	1475	1461	1741	1558	1585	1377	1464	1655	1504	1691	1131	1758	1480	1788	1660	1512	1991	1799	1790
LOC643441	0	0	0	0	0	0	0	0	0	0	0	0	0	0	0	0	0	0	0	0	0	0	0	0
MAGI3	3003	3239	2124	2548	2825	2879	2551	2801	2910	2973	2264	3088	3016	2927	2728	1831	3489	3007	2812	2786	2951	3387	2992	3125
PHTF1	1452	1631	1368	1548	1662	1571	1185	1335	1480	1256	1152	1435	1406	1299	1298	1379	1619	1248	1495	1267	1415	1685	1364	1345
RSBN1	2095	2632	2368	2650	3582	3464	3324	3426	3605	3221	2774	3492	3889	3884	3966	2776	4072	3636	3717	3882	3823	4323	3933	4375
AP4B1-AS1	11	38	22	34	34	61	52	74	26	33	39	38	24	38	55	24	37	21	23	38	37	14	23	46
PTPN22	0	6	4	1	0	1	0	0	0	0	0	0	0	0	0	5	0	8	2	0	8	0	0	0
BCL2L15	14	19	20	18	0	6	0	0	0	6	40	18	16	18	24	25	20	8	10	16	22	13	14	13
AP4B1	825	814	486	518	768	805	648	688	636	710	622	739	875	860	955	977	1062	990	858	854	886	997	831	934
DCLRE1B	1950	2482	1989	2359	2461	2537	2183	2469	2734	2566	2411	2523	3130	2814	2931	2457	3299	2812	2913	2985	2635	3474	3026	3249
HIPK1-AS1	4	9	4	14	10	3	8	23	2	12	0	12	10	8	0	7	6	5	0	2	4	4	0	0
HIPK1	6540	7399	3731	4116	4848	5213	4022	4230	4519	4442	4084	5250	5311	5097	4878	3227	6568	5949	5470	5705	5335	6805	6175	6635
OLFML3	14	9	10	2	18	4	5	4	0	0	4	36	0	12	8	4	28	4	14	14	0	0	0	8
SYT6	78	111	54	72	93	70	82	68	41	56	51	38	47	48	43	52	40	59	39	65	18	155	47	60
TRIM33	5711	7056	5429	6277	6484	6708	5775	6693	6996	6448	5248	6924	7975	7767	7347	4385	8488	7433	6950	7806	7140	8415	7759	8148
BCAS2	3586	5205	4195	4991	5407	5124	4806	5289	6100	5082	4978	4938	6300	6583	6408	8038	7299	6390	6760	7208	6761	7627	7131	7215
DENND2C	582	662	559	612	740	764	690	662	654	838	503	765	823	724	674	461	731	587	655	644	889	831	634	695
AMPD1	2	0	0	0	4	0	0	0	2	0	0	0	2	0	2	0	6	0	6	3	0	0	12	0
NRAS	9293	10311	5857	6000	6643	6341	4915	5377	5473	5360	4487	5942	6733	6136	6481	5727	8468	7076	7384	6920	6844	8326	7722	7951
CSDE1	55010	66317	40934	42122	43236	40912	28619	31713	32271	30956	27448	34696	33870	31993	30701	30994	40487	37545	33879	34044	32839	40964	36020	38330
SIKE1	5269	6184	4745	4576	4634	4724	3803	4328	4569	4093	3497	4509	5038	4519	4692	3423	5118	4775	5001	5050	4774	5309	4797	5667
SYCP1	0	0	0	0	0	0	0	0	0	0	0	0	0	0	0	0	0	0	0	0	0	0	0	0
TSHB	0	2	0	0	0	0	3	0	0	0	0	0	0	0	0	0	0	0	0	0	0	0	0	0
TSPAN2	201	270	224	231	259	243	157	231	250	196	190	162	166	233	229	239	220	254	185	235	230	262	283	199
NGF	0	0	0	0	8	0	7	14	20	0	4	2	7	4	10	4	0	0	4	0	4	0	0	0
VANGL1	3575	3849	2746	3262	3956	3910	3481	4042	3855	3911	3180	3872	4460	4248	4271	3145	4561	4320	3644	3894	3700	4401	3556	4067
CASQ2	8	14	2	0	0	4	0	0	0	0	10	0	0	0	14	0	4	0	2	0	13	4	0	0
NHLH2	115	64	70	95	103	81	81	117	77	105	125	110	151	129	121	145	62	99	178	123	94	159	132	59
LINC01649	0	0	0	0	0	0	0	0	0	0	0	0	4	0	0	0	0	0	0	0	0	0	0	0
LOC101928977	0	0	0	2	0	1	0	0	0	0	0	0	0	0	0	0	0	0	0	0	0	0	0	6
SLC22A15	242	289	189	305	307	321	292	293	226	292	258	271	343	298	370	202	256	224	303	280	298	385	291	305
MAB21L3	2	0	0	0	2	0	2	12	0	0	0	6	5	0	12	0	2	8	4	2	3	12	0	0
ATP1A1	42687	50409	33897	36072	38322	38194	26330	27098	27766	25699	23802	27827	29223	25585	25008	24449	32856	30964	28719	28023	25407	33990	28377	29884
ATP1A1-AS1	78	127	99	126	172	128	121	131	154	122	110	114	141	109	135	159	160	94	111	164	80	101	94	103
LINC01762	2	0	0	0	0	0	0	6	0	0	0	0	0	1	0	10	0	0	0	0	1	1	8	0
CD58	324	315	307	363	315	363	332	453	381	312	449	439	565	402	480	523	429	389	438	502	493	488	452	396
MIR548AC	0	0	0	0	0	0	4	0	0	0	0	0	0	0	0	0	0	2	0	0	0	3	0	0
IGSF3	2830	3481	2159	1934	2290	2205	1611	1727	1782	1492	1527	1773	1950	1779	1787	1178	2098	2146	2068	1809	1711	2262	1673	1983
MIR320B1	0	0	0	0	0	0	0	0	0	0	0	0	0	0	0	0	0	0	0	0	0	0	0	0
LINC02868	0	0	0	0	0	0	0	0	0	0	0	0	0	0	0	0	0	0	0	0	0	0	0	0
CD2	0	0	0	0	0	6	0	0	0	0	0	0	0	0	0	0	0	0	0	0	0	0	0	0
PTGFRN	5115	6069	3456	3708	3667	3743	3188	3093	3187	3206	3046	3247	3993	3964	3691	3165	4509	4370	4189	4529	4276	4935	4174	4002
CD101	72	127	95	82	101	112	115	126	144	81	92	107	122	101	75	80	141	97	82	73	87	183	112	157
CD101-AS1	34	14	9	46	18	20	28	13	47	40	15	36	32	15	44	17	41	13	13	7	16	21	10	31
TTF2	6469	7028	5168	5580	6020	6018	4944	5360	5706	5541	5364	5452	6028	5762	5737	4743	6815	5993	6078	5757	6017	7618	5935	6207
MIR942	2	0	4	0	3	4	0	1	0	0	0	0	2	0	0	0	0	0	0	2	0	0	0	0
TRIM45	566	579	465	560	599	669	674	726	750	569	560	704	672	666	798	659	634	720	653	480	697	774	585	632
VTCN1	0	0	0	0	0	0	0	0	5	0	0	0	0	0	0	0	0	0	0	0	0	0	0	0
LINC01525	0	0	0	0	0	0	0	0	0	0	0	0	0	0	0	0	0	0	0	0	0	0	0	0
MAN1A2	4143	5194	3566	3747	4303	4229	3327	3757	3994	3782	3055	4047	3768	4311	3774	2579	5021	4886	4567	4565	4889	5412	5428	5185
TENT5C-DT	0	0	0	0	0	0	0	0	0	0	0	1	0	0	0	0	0	0	0	0	0	0	0	0
TENT5C	496	600	556	541	647	693	542	629	759	583	539	607	599	698	758	763	713	829	670	659	664	824	612	713
GDAP2	1489	1297	656	643	728	767	555	677	788	582	577	780	786	675	551	619	813	742	665	708	725	974	765	912
WDR3	9036	11405	9036	9993	10854	10841	9442	10840	11148	10703	8842	10322	12122	12309	12153	9948	13893	12124	12009	12504	11354	13821	12630	12562
SPAG17	25	31	2	29	11	29	21	3	2	25	15	6	26	28	17	10	16	17	12	23	22	36	2	16
TBX15	16	0	0	7	8	4	2	17	0	0	0	0	14	14	0	6	4	4	16	13	14	15	10	2
WARS2	1676	1691	1470	1709	1766	1815	1587	1656	1820	1741	1434	1943	2066	2101	2307	2138	2329	2004	1880	2184	1930	2278	1874	2231
WARS2-IT1	0	0	0	0	0	0	0	0	0	0	0	0	0	0	0	0	0	0	0	0	0	0	0	0
WARS2-AS1	711	788	438	685	660	756	532	584	537	641	505	726	759	725	621	676	850	702	777	634	901	694	751	840
HAO2	0	2	0	0	0	1	3	2	0	4	4	0	0	2	8	0	0	2	0	0	0	0	4	0
HAO2-IT1	0	0	0	0	0	0	0	0	0	0	0	0	0	0	0	0	0	0	0	0	0	0	0	0
HSD3B2	0	4	0	0	0	0	1	0	4	0	0	0	0	2	16	0	0	0	2	0	0	8	0	6
HSD3B1	0	0	0	0	0	0	0	0	0	0	0	0	0	0	0	0	0	0	0	0	0	0	0	0
HSD3BP4	8	0	0	1	13	6	5	2	22	2	2	19	5	5	6	2	24	11	0	3	16	8	0	5
LINC00622	33	30	12	38	50	36	20	22	12	4	13	42	20	22	2	32	28	20	12	32	10	30	4	20
ZNF697	1010	1431	854	1094	1405	1350	1308	1532	1551	1314	1321	1393	1787	1788	1826	1478	2157	1822	1751	1899	1799	2084	1761	2204
PHGDH	21404	24344	11879	12434	13227	12750	8767	8551	8522	8509	8100	9106	8700	8164	7760	10569	10719	9657	9008	8985	8704	10488	8526	8740
HMGCS2	0	0	0	0	0	0	0	0	0	0	0	0	0	0	0	0	0	0	0	0	0	0	0	0
REG4	0	12	6	0	4	4	6	6	0	0	0	0	0	0	0	0	0	0	0	0	0	0	1	6
NBPF7P	0	0	0	0	0	0	0	0	0	0	0	0	0	0	0	0	0	0	0	0	0	0	0	1
ADAM30	0	0	0	0	0	0	0	0	0	0	0	0	0	0	0	0	0	0	0	0	0	0	0	0
NOTCH2	17859	18410	9426	9738	10550	10388	7940	8145	9334	7981	7596	10359	9993	9578	9077	5343	12805	12027	11151	11202	11083	14337	12538	12987
SEC22B	3281	4448	3482	4474	4815	4620	4354	4767	5047	4734	4136	4486	5551	5289	5067	5512	6205	5702	5763	5824	5460	6470	5423	6053
	7	23	14	8	22	22	24	16	10	15	22	13	23	27	14	14	17	14	26	13	28	11	8	12
NBPF8	1031	818	797	1131	1211	1035	1148	1203	1387	1046	1353	1230	1370	1116	1364	1028	1255	1164	1358	1278	1535	1484	1153	1366
PFN1P2	40	38	56	54	63	41	68	34	40	52	43	63	49	61	69	8	63	56	57	69	72	117	30	72
PDE4DIPP2	271	275	347	409	323	391	370	422	569	391	443	480	488	336	480	222	384	307	405	355	359	427	430	396
NOTCH2NLR	2	2	4	14	2	7	10	0	0	2	0	4	8	3	10	0	2	0	6	3	6	1	2	0
NBPF26	290	246	183	235	334	283	260	247	354	197	215	249	296	323	263	181	259	272	254	245	281	327	225	348
TRN-GTT2-1	0	0	0	0	0	0	0	0	0	1	0	0	6	0	0	0	0	0	3	1	3	0	0	0
RNVU1-19	0	0	0	0	0	0	0	0	0	0	0	0	0	0	0	0	0	0	0	0	0	0	0	0
PPIAL4A	0	4	2	0	1	8	8	0	0	0	16	9	2	4	0	0	6	8	10	0	6	0	14	6
LINC00623	220	238	176	270	268	322	160	270	276	325	165	244	356	279	295	411	237	259	311	310	252	241	217	243
RNVU1-4	0	0	0	0	0	2	0	2	0	0	0	0	1	2	4	6	0	4	0	0	0	0	0	0
TRN-GTT11-2	6	0	0	0	0	0	0	0	0	0	0	0	0	0	0	0	0	0	1	0	0	0	0	0
LOC105369199	1	0	2	3	0	0	14	0	0	16	0	0	0	1	0	0	2	3	7	0	0	0	8	1
	0	0	0	2	0	1	4	0	0	0	0	0	0	0	0	0	0	0	0	0	0	0	10	2
	0	0	0	0	0	0	0	0	0	0	0	0	0	0	0	0	1	0	0	2	0	0	0	0
PDE4DIPP4	2	0	0	0	0	1	0	2	0	0	0	0	0	0	0	0	0	0	0	0	0	0	0	0
FCGR1BP	0	0	0	2	2	0	0	0	0	0	0	0	0	3	0	0	0	16	0	0	0	0	0	0
LOC100996318	0	8	2	0	22	9	4	1	0	8	6	2	8	2	12	0	0	6	0	2	14	0	0	24
H2BP1	0	1	0	3	0	0	0	0	0	0	0	0	2	0	1	8	0	0	0	0	2	2	0	0
FAM72B	1007	1504	1366	1474	1771	1484	1265	1617	1719	1345	1171	1576	1509	1508	1671	1432	1904	1372	1521	1453	1407	1642	1237	1204
SRGAP2C	1088	1304	1068	1147	1174	1220	1101	1110	1311	1093	1150	1137	1340	1189	1146	770	1447	1265	1294	1293	1111	1378	1166	1246
SRGAP2-AS1	0	0	2	0	0	0	0	0	0	8	0	0	1	0	0	0	0	0	0	0	0	0	0	0
EMBP1	37	37	54	32	33	39	27	37	28	46	29	20	30	8	20	40	32	66	28	30	28	44	42	49
LOC101929815	0	0	0	0	0	0	0	0	0	0	0	1	0	0	0	0	0	0	0	0	0	0	0	0
TRQ-CTG4-2	0	0	0	0	0	0	0	0	0	0	0	0	0	0	0	0	0	0	0	0	0	0	0	0
RNVU1-17	0	0	0	0	0	0	0	0	0	0	0	0	0	0	0	0	0	0	0	0	0	0	0	0
RNVU1-18	0	0	0	0	0	0	0	0	0	0	0	0	0	6	0	0	6	0	0	0	4	0	0	0
TRN-GTT6-1	0	0	0	0	0	0	0	0	0	0	0	0	0	0	0	0	0	0	0	0	0	0	0	0
LOC105369140	0	0	0	0	2	1	0	0	0	2	0	0	4	0	2	4	0	6	2	8	0	0	8	6
LINC02591	0	0	0	0	0	0	0	0	0	0	0	0	0	0	0	0	0	0	0	0	0	0	1	0
TRV-CAC8-1	0	0	0	0	0	0	0	0	0	0	0	0	0	0	0	0	0	0	0	0	0	0	0	0
TRV-CAC4-1	0	0	0	0	0	0	0	0	0	0	0	0	0	0	0	0	0	0	0	0	0	0	0	0
PDE4DIPP3	0	0	0	0	0	0	0	0	0	0	0	0	0	0	0	0	0	0	0	0	0	0	0	0
TRN-GTT12-1	0	0	0	0	0	0	0	0	0	0	0	0	0	0	0	0	0	0	0	0	0	0	0	0
FCGR1CP	0	0	0	0	0	0	0	0	0	0	0	0	0	0	0	0	0	0	0	0	0	0	0	0
	0	0	0	0	0	0	0	2	2	6	0	0	8	0	0	0	0	0	0	0	1	0	0	0
FAM72C	231	283	215	321	268	399	352	382	364	320	199	349	421	313	332	368	306	318	262	258	290	343	302	282
SRGAP2D	168	214	134	154	154	240	234	171	282	220	187	143	228	145	188	113	203	172	212	234	184	256	216	174
LOC101060524	0	0	0	0	0	1	0	0	0	0	0	0	0	0	0	0	0	0	0	0	0	0	0	0
PPIAL4E	0	3	0	0	0	0	0	0	0	0	0	2	0	0	1	1	0	1	0	0	0	0	2	0
RNVU1-15	11	2	2	12	11	9	0	1	0	4	8	0	10	6	6	4	1	14	13	16	9	0	0	9
TRN-GTT3-1	0	0	0	2	3	0	0	2	4	0	2	0	0	0	2	2	0	0	0	0	0	0	0	0
NBPF15	1762	1755	1560	1721	1880	1929	1720	1804	1760	1498	1768	1771	1741	1581	1899	1513	1741	1592	1980	1762	1995	1983	1814	1846
TRN-GTT2-8	0	0	0	0	0	0	0	0	0	0	0	0	0	0	0	0	0	0	0	0	0	0	0	0
PPIAL4F	0	0	0	0	0	0	0	0	0	0	0	2	0	0	0	1	0	0	0	2	0	0	0	0
LOC105371215	0	0	0	0	0	0	0	0	0	0	0	0	0	0	0	0	0	0	0	0	0	2	0	0
DRD5P2	0	0	0	0	0	0	0	0	0	0	0	0	0	0	0	0	0	0	0	0	0	0	0	0
LSP1P5	0	4	0	0	0	2	0	8	2	0	0	0	0	2	4	2	0	0	0	2	0	0	0	0
SRGAP2B	373	565	378	446	427	472	434	552	445	527	353	501	463	414	505	267	467	325	484	473	427	539	410	449
FAM72D	521	612	508	787	808	772	789	965	816	763	809	782	885	735	813	815	829	667	805	762	634	919	682	717
LOC101929805	0	0	0	0	1	0	0	0	9	0	0	0	0	0	0	0	0	0	0	0	0	0	0	0
	16	4	4	20	26	32	16	30	18	6	0	4	17	18	26	0	23	18	12	2	0	48	18	0
LINC01145	48	69	33	40	78	65	69	81	48	55	80	58	53	84	100	65	57	45	69	74	70	47	53	29
PPIAL4D	0	0	1	0	0	0	2	0	0	0	0	0	0	0	0	2	0	0	0	3	0	0	0	0
RNVU1-14	2	2	0	9	6	5	12	0	0	0	6	0	4	10	4	0	7	4	0	13	0	3	12	1
TRN-GTT2-7	3	6	4	2	0	0	2	1	6	6	0	0	0	0	0	0	6	0	0	0	2	6	0	4
NBPF20	335	368	342	368	375	277	308	284	335	317	263	334	276	370	323	332	410	344	347	379	427	419	415	447
	0	0	0	0	0	0	0	0	0	0	0	0	0	0	0	0	0	0	0	0	0	0	0	0
PDE4DIPP5	0	5	0	6	6	2	8	1	0	0	0	0	0	2	6	2	6	12	0	2	0	0	0	3
NBPF25P	53	75	59	70	25	51	47	42	98	103	45	102	38	61	123	46	151	52	76	71	111	81	103	63
GPR89A	337	538	463	519	499	465	391	496	403	381	367	492	497	407	414	532	524	442	634	428	558	656	557	504
PDZK1	32	3	3	26	22	22	10	26	48	17	45	22	25	46	28	16	51	29	41	24	52	60	34	20
CD160	26	28	38	22	63	35	41	16	18	32	19	25	21	38	30	52	32	13	11	39	25	37	39	28
RNF115	1454	2001	1643	1984	1750	1829	1549	1647	1661	1742	1402	1478	1811	1722	1731	2072	2378	1934	1955	2044	1936	2180	2376	2035
POLR3C	2650	3335	2699	3401	3882	3708	3480	3947	4439	3767	3549	3604	4819	4775	5137	4986	5719	5197	5094	5393	5067	6076	5313	5317
NUDT17	183	176	77	142	138	248	135	147	162	195	179	167	233	147	225	196	132	130	258	146	166	181	137	156
PIAS3	2016	2423	1825	1981	2317	2386	2205	2183	2383	2005	2102	2079	2430	2332	2191	1951	2393	2642	2395	2399	2146	2544	1934	2339
MIR6736	0	0	0	0	0	0	0	0	0	0	0	0	5	0	0	0	0	0	0	0	0	0	0	0
ANKRD35	0	6	0	2	1	0	0	0	0	0	2	4	0	0	8	0	0	0	0	0	3	0	0	10
ITGA10	44	32	22	14	40	46	44	58	78	134	56	30	33	46	58	63	81	52	30	75	89	64	48	59
PEX11B	710	719	383	412	435	572	500	387	330	470	423	400	517	599	549	746	531	632	572	662	635	747	528	649
GNRHR2	40	37	22	32	45	38	25	60	72	39	38	43	83	45	57	32	34	65	76	54	41	43	37	44
RBM8A	7460	10119	8156	9497	10332	10498	8617	9798	10246	9707	8468	9572	11484	11217	11218	13690	12782	12438	11799	12728	11708	13609	12416	12972
LIX1L	3261	4059	2907	3301	3469	3793	2871	3007	3075	2733	2599	3222	3306	3263	3012	3171	4025	3409	3402	3473	3238	3903	3232	3455
POLR3GL	860	980	722	1038	1001	1076	977	1053	1089	871	856	958	1073	1017	1013	1251	991	1095	911	1200	911	1228	979	1001
ANKRD34A	433	423	266	352	297	455	311	394	515	298	313	338	570	399	373	480	676	520	468	393	464	534	460	404
TXNIP	1138	1082	829	1251	1605	1566	1549	1553	1573	1314	1459	1197	1752	1381	1562	1492	1667	1551	1274	1354	1260	1780	1634	1330
HJV	0	0	0	0	0	0	0	0	1	0	0	0	0	0	0	0	0	0	0	0	0	0	0	0
TRE-CTC1-1	0	0	0	0	0	0	0	0	0	0	0	0	0	0	0	0	0	0	0	0	0	0	0	0
TRG-TCC2-1	0	0	0	0	0	0	0	0	0	0	0	0	0	0	0	0	0	0	0	0	0	0	0	0
TRH-GTG1-1	0	0	0	0	0	0	0	0	0	0	0	0	0	0	0	0	0	0	0	0	0	0	0	0
TRK-CTT2-1	0	0	0	2	0	0	0	0	0	0	0	0	0	0	0	0	0	0	0	0	0	0	0	0
RNVU1-6	0	5	3	2	0	2	0	2	1	0	5	0	0	0	1	6	10	0	10	0	0	0	0	0
LINC01719	110	102	94	159	159	178	125	198	148	143	115	144	148	119	145	90	184	105	110	150	94	89	79	137
NBPF10	84	134	121	113	146	120	139	144	227	57	95	121	115	132	154	85	191	92	132	98	168	171	140	142
NOTCH2NLA	177	167	180	140	181	212	200	240	160	124	130	175	193	182	244	125	213	172	239	164	180	254	99	125
NUDT4P2	1	2	0	0	0	6	0	0	0	2	0	0	0	0	0	1	4	5	0	0	1	8	0	0
PPIAL4H	0	0	0	0	0	0	0	0	5	13	0	0	0	0	0	4	0	0	0	0	0	0	0	0
	0	0	0	0	0	1	1	0	0	0	0	7	0	0	0	0	0	0	0	0	0	0	0	0
HYDIN2	1	1	0	0	0	0	0	0	0	0	0	0	0	0	0	0	0	0	0	2	0	0	0	8
	3	6	11	8	12	6	11	5	18	4	6	12	13	16	9	8	36	4	0	16	28	29	6	8
NBPF12	673	674	688	750	916	897	789	898	1226	786	848	782	1024	883	978	796	1040	871	930	934	1073	1126	1027	738
LOC728989	4	0	0	0	0	4	0	0	0	0	0	0	0	4	0	0	2	0	1	0	0	0	2	0
TRH-GTG1-2	0	0	0	0	0	0	0	0	0	0	0	0	0	0	0	0	0	0	0	0	0	0	0	0
RNVU1-8	0	5	0	0	4	0	0	2	0	1	0	0	2	0	0	1	0	2	0	0	1	0	0	0
NBPF13P	0	0	0	0	0	3	0	4	1	0	0	0	0	0	0	1	1	0	0	0	0	0	3	20
PRKAB2	2245	2404	2037	2551	2349	2336	2472	2440	2730	2129	2260	2472	2958	2846	3173	2707	3500	2828	2952	2915	3012	3480	3088	3372
PDIA3P1	1942	2575	1759	2287	2294	2181	2141	2099	2089	2121	1702	2147	2516	2390	2505	3124	3032	2708	2624	2703	2483	2985	2400	2661
FMO5	175	170	131	206	177	207	115	135	127	168	190	213	156	115	127	130	142	141	116	154	186	177	150	218
CHD1L	4486	5166	4245	4602	5146	4969	3910	3997	4350	4244	3936	4282	4238	4123	4579	4722	4625	4404	4467	4456	4257	4832	4379	4543
LINC00624	4	13	8	12	10	20	2	2	0	4	13	0	10	13	4	30	0	8	2	22	10	20	14	22
BCL9	3352	3452	2144	2208	2656	2857	2474	2686	2945	2541	2516	2536	2796	3089	2979	2200	3764	3725	3323	3253	2833	3700	3237	3622
ACP6	1106	1327	1048	1323	1329	1494	1153	1225	1220	1069	987	1129	1425	1167	1396	1296	1435	1287	1418	1225	1222	1505	1094	1225
GJA5	4	6	10	6	18	12	14	12	41	8	2	12	4	10	16	5	7	16	2	8	10	4	14	12
GJA8	0	1	4	0	0	0	0	0	0	0	0	0	6	1	0	2	2	0	0	0	0	0	0	0
GPR89B	195	223	278	268	302	266	194	246	276	246	245	246	229	292	294	277	262	281	332	287	350	427	329	357
PDZK1P1	6	21	7	22	10	20	42	13	18	3	17	19	19	22	21	10	16	6	29	20	25	40	13	0
TRQ-CTG3-2	0	0	0	0	0	0	0	0	0	0	0	0	0	0	0	0	4	0	0	0	0	0	0	0
RNVU1-7	7	0	0	0	0	0	0	0	0	0	9	0	0	0	11	0	0	0	0	0	0	0	0	0
TRN-GTT9-2	0	0	0	0	0	0	0	0	0	0	0	0	0	0	0	0	0	0	0	0	2	0	0	0
NBPF11	703	687	620	945	785	904	865	845	981	799	734	912	830	843	913	822	926	835	936	867	883	979	848	901
LOC101927468	0	0	0	0	0	0	0	0	0	0	0	0	0	0	0	0	0	0	0	0	0	0	0	0
TRQ-CTG4-1	1	1	0	0	0	0	0	0	0	8	0	0	4	1	0	0	0	0	4	0	0	0	0	0
TRH-GTG1-3	0	0	0	0	0	0	0	0	0	0	0	0	0	0	0	0	0	0	0	0	0	0	0	0
TRH-GTG1-4	0	0	0	0	0	0	0	0	0	0	0	0	0	0	0	0	0	0	0	0	0	0	0	0
TRQ-CTG7-1	2	0	0	0	0	0	0	0	0	0	5	0	0	4	0	0	0	0	0	0	0	0	0	0
MIR5087	3	0	4	0	0	0	3	5	0	0	1	3	0	0	0	0	15	2	0	4	0	0	0	0
RNVU1-1	3	3	0	0	0	1	2	0	0	0	4	0	0	0	0	0	0	0	0	0	6	0	0	0
MIR6077	1	0	0	0	2	1	0	2	0	0	0	0	0	0	4	0	0	0	0	2	0	0	0	0
RNVU1-2	0	0	0	0	2	0	2	0	0	0	0	0	0	0	0	0	0	0	1	0	0	0	0	0
PDE4DIPP6	42	20	18	64	30	66	25	45	67	54	20	38	60	52	14	29	32	33	51	26	59	81	40	26
RNVU1-3	0	0	0	6	0	2	0	0	4	1	0	5	0	4	6	10	1	6	0	1	13	0	0	4
LINC01138	218	302	190	247	268	269	206	228	211	182	210	231	169	184	279	165	249	208	218	203	168	176	260	183
PPIAL4G	2	0	0	4	2	5	2	0	0	1	0	0	0	1	0	0	0	4	0	0	2	0	0	0
NBPF14	336	406	314	370	527	416	401	491	499	347	395	402	493	383	525	362	515	383	424	435	420	455	605	446
NOTCH2NLB	161	138	113	126	155	138	141	159	199	107	136	144	145	170	146	110	202	159	186	160	136	155	134	149
NUDT4B	0	6	0	2	0	0	2	1	4	9	7	7	0	2	0	0	2	0	5	0	2	0	2	0
PDE4DIP	3822	4517	3398	3834	4094	4191	3324	3681	3814	3779	3464	4286	4353	4279	4038	3910	5184	4633	4426	4374	4292	5064	4212	4721
NBPF9	1128	1292	1027	1362	1315	1266	1248	1191	1501	1168	1185	1355	1176	1206	1387	906	1256	1250	1293	1360	1297	1495	1153	1505
LOC653513	0	17	13	14	9	9	1	2	6	13	0	3	8	14	4	12	4	4	2	3	6	16	0	4
	0	1	0	0	3	2	1	0	0	0	0	0	0	0	0	0	0	0	0	1	0	0	0	0
NBPF19	446	538	423	539	605	573	559	529	526	431	465	619	510	637	565	626	606	426	516	533	599	698	497	455
PPIAL4C	2	0	0	0	2	4	0	4	0	2	2	4	0	0	0	0	0	12	8	6	0	0	0	4
LINC00869	154	250	195	209	324	325	216	268	272	238	169	364	346	232	256	339	322	308	284	258	258	303	193	208
LOC644634	0	0	0	0	0	0	0	0	0	0	0	0	0	0	0	0	0	0	0	0	0	0	0	0
TRV-CAC1-7	0	0	0	0	0	0	0	0	0	0	0	0	0	0	0	0	0	0	0	0	0	0	0	0
PDE4DIPP7	0	3	0	0	0	0	0	0	0	0	0	0	0	0	0	1	0	0	0	0	0	0	0	0
TRN-GTT8-1	0	0	0	0	0	0	0	0	0	0	0	0	0	0	0	0	0	0	0	0	0	0	0	0
H2BC18	164	128	133	142	158	144	97	110	48	133	55	70	113	106	117	145	122	119	82	72	76	110	80	106
FCGR1A	0	0	6	0	0	4	4	2	0	2	2	0	0	10	0	4	0	0	4	0	9	0	6	4
	4	0	0	0	4	0	6	0	0	0	0	6	0	2	0	0	0	0	18	2	2	14	0	0
H3C13	8	2	12	14	6	20	8	10	10	6	4	8	8	10	20	21	20	16	37	18	4	20	26	20
H4C14	0	4	0	0	0	0	0	0	0	0	4	0	4	0	2	0	0	0	0	10	6	14	4	0
	5	4	0	0	0	4	6	0	0	2	2	0	4	0	4	0	2	0	2	0	0	0	2	4
H3C14	0	0	0	0	0	2	5	2	2	2	0	0	4	0	1	1	0	0	0	0	0	2	6	0
H2AC18	0	4	3	12	3	4	7	0	5	1	4	7	13	8	3	0	32	11	0	12	0	8	22	4
H2BC20P	18	34	34	32	22	26	38	17	14	5	10	27	37	34	37	19	16	25	30	5	30	36	24	15
H2AC19	2	2	3	10	5	2	3	0	0	0	5	4	4	5	4	4	6	22	0	10	2	1	4	0
H3C15	0	6	0	0	0	0	0	0	0	1	0	0	0	0	0	2	0	0	0	0	3	0	0	0
H4C15	0	0	6	0	0	0	1	0	10	0	0	2	0	0	0	8	6	0	0	0	0	8	0	0
H2BC21	175	175	154	192	222	239	154	132	166	152	118	135	224	156	165	176	248	200	155	158	74	203	130	110
H2AC20	48	69	55	66	103	75	45	76	82	48	76	82	52	83	82	120	135	118	68	85	65	48	148	58
H2AC21	14	14	4	4	2	6	0	8	0	2	4	20	10	19	0	8	14	18	8	4	10	16	0	0
BOLA1	701	850	754	845	1024	1055	957	971	1086	806	1085	857	1265	1118	1077	1447	1232	1201	1036	1158	1050	1182	997	1166
SV2A	2232	2715	2023	2263	2616	2623	2359	2163	2178	2137	2216	2179	2705	2621	2544	2384	2792	2838	3136	3090	2898	3608	2995	3079
SF3B4	5611	7255	5882	7710	8149	9495	7797	8228	8951	8051	7696	7450	9643	10417	10306	11020	12519	10877	11227	10885	10315	11588	10471	10522
MTMR11	103	66	53	108	72	102	115	108	95	90	150	132	123	95	117	138	67	79	130	108	176	81	68	146
OTUD7B	2038	2509	1633	2192	2812	2847	2437	2709	2550	2451	2483	2614	3209	3091	2942	2553	3293	3610	3003	3515	3242	3522	3095	3304
	2	1	2	12	0	0	0	3	8	6	0	0	2	0	7	3	4	0	1	4	0	4	2	10
VPS45	2335	2682	2295	2643	2990	2795	2546	2709	2766	2649	2291	2832	3071	2834	2974	3096	3343	3235	2893	3300	3045	3339	3287	3468
PLEKHO1	1360	1940	1604	1682	1846	2015	1383	1517	1596	1544	1323	1476	1782	1787	1744	2232	1990	1686	1855	1721	1549	1709	1533	1449
ANP32E	11711	15307	12644	14296	15247	14755	12303	14089	14182	13339	11398	13735	14988	14690	14124	14598	17531	14580	14431	15051	14980	16374	14503	15856
CA14	31	33	20	47	36	30	18	30	57	47	12	42	32	43	44	22	64	46	39	21	39	22	20	20
APH1A	8315	9767	6376	6870	6884	7772	5554	5582	6142	5765	5187	5752	6296	5875	5601	6391	8152	7125	6540	6748	6286	7597	6386	6379
C1orf54	22	71	28	54	65	76	51	54	38	57	20	48	67	72	78	85	61	61	40	39	41	67	30	58
CIART	18	14	9	46	16	36	12	14	18	16	34	32	32	27	16	33	2	12	53	22	11	18	34	44
MRPS21	3317	4279	3380	4334	4527	4316	4011	3949	4420	3639	3551	3622	4967	4617	4403	6526	4404	4690	4060	4556	4222	4839	3881	4812
PRPF3	4122	4693	4240	4754	5427	5555	5035	5688	6272	5435	5304	5591	6551	6280	6689	7163	7032	6172	6523	6465	5783	6973	6445	6135
RPRD2	4452	5433	4113	4895	6046	6096	5352	6192	6241	6020	4920	6233	6515	6796	6553	4341	7182	6760	6647	6935	6135	7176	6479	6735
TARS2	4563	5206	3082	3156	3206	3322	2582	2798	3067	2660	2872	3450	3693	3475	3654	3952	4038	3834	3933	4170	4092	4831	3731	4217
MIR6878	5	5	0	1	3	0	0	1	2	7	2	4	4	6	1	4	0	1	6	3	4	0	2	14
ECM1	33	7	22	31	66	59	82	50	45	53	69	78	94	116	91	96	43	36	80	70	86	66	77	53
FALEC	17	12	6	4	3	35	25	23	12	21	15	21	11	42	35	10	23	19	26	12	3	14	11	18
ADAMTSL4	65	84	48	28	78	87	70	47	66	13	51	69	73	57	109	38	87	54	49	63	85	92	21	38
	0	0	0	0	2	1	4	0	2	0	10	3	0	0	0	2	1	0	0	2	1	6	0	0
MIR4257	0	0	0	0	0	0	0	0	0	0	0	0	0	0	0	0	0	0	0	0	0	0	0	0
ADAMTSL4-AS1	6	1	0	0	0	3	6	0	0	3	2	6	3	2	4	0	6	2	0	19	2	14	9	2
MCL1	13248	16384	13602	16766	19482	19804	18689	21830	21641	21242	19077	22098	24889	24320	24302	22628	28614	25267	24784	25168	24393	28616	24966	25451
ENSA	12014	14648	10939	12447	13990	14134	11000	11003	11148	10521	9697	10713	12323	11161	11569	15152	12808	11760	12399	11294	11077	13028	11192	12416
GOLPH3L	2332	2820	2235	2937	3725	3694	3426	4036	4305	4199	3629	4265	5550	5176	4903	4950	5778	5290	5141	5566	4964	6292	5261	5853
HORMAD1	0	0	0	0	0	0	4	0	0	0	0	0	0	0	0	0	0	0	0	0	0	0	0	0
CTSS	0	2	0	0	0	8	8	0	4	2	0	0	6	2	0	0	4	0	0	8	0	0	12	6
CTSK	25	29	30	46	39	103	64	66	62	60	110	85	39	55	14	116	52	78	47	39	84	59	61	79
ARNT	3270	4000	3457	3961	4061	4204	3489	3813	4095	4025	3206	3894	4209	4124	4018	3193	4536	4366	4351	4530	4279	5052	4290	4656
SETDB1	3358	4190	2964	3301	3852	3984	3561	3554	4052	3712	3519	3313	4455	4015	4154	3731	5061	4242	4232	4370	4260	4864	4211	4569
CERS2	10367	13152	10280	11540	13093	13033	10112	10706	11225	10467	9442	10518	11989	10736	11253	11105	13554	12226	11788	12166	11266	13738	11359	11545
ANXA9	195	267	235	239	161	208	152	135	160	173	196	255	233	146	150	234	223	136	153	153	145	245	202	253
MINDY1	841	879	677	807	757	970	770	667	754	809	730	879	854	752	649	789	918	752	814	780	763	1020	722	741
PRUNE1	2154	2961	2051	2598	2857	2955	2668	2698	3001	2835	2543	2734	3385	3498	3290	3035	3907	3566	3561	3622	3500	3849	3450	3627
BNIPL	53	41	64	73	72	99	47	39	71	88	136	70	131	110	61	136	173	43	68	93	122	131	75	116
C1orf56	186	305	194	286	255	350	323	219	293	250	289	239	365	242	237	403	279	275	328	231	264	310	260	205
CDC42SE1	3888	4706	3129	3918	4442	4529	3595	4302	4550	3516	3911	4475	4974	4697	4551	4079	5349	4684	4647	4590	4666	5305	4599	4792
MLLT11	529	613	552	747	787	716	601	689	604	587	544	612	723	621	746	564	713	710	682	585	649	613	596	693
GABPB2	357	345	241	295	368	398	329	384	358	335	303	294	410	310	396	346	440	446	445	343	315	397	375	411
SEMA6C	447	392	299	498	499	526	457	481	609	476	562	363	448	460	472	543	596	482	471	486	492	519	368	461
TNFAIP8L2-SCNM1	0	0	0	0	0	0	0	0	0	0	0	0	0	0	0	0	0	0	0	0	0	0	0	0
TNFAIP8L2	10	11	0	5	12	4	10	2	8	5	4	27	8	5	4	11	5	4	8	12	6	4	8	5
LYSMD1	609	993	955	914	1387	1416	1252	1240	1475	1300	1121	1250	1610	1536	1676	1744	1653	1553	1723	1728	1863	1783	1519	1684
SCNM1	26	40	31	35	47	61	66	55	51	47	47	52	59	56	75	110	71	73	98	64	86	94	43	68
TMOD4	26	21	33	22	31	43	59	23	17	10	31	54	20	45	14	26	38	24	60	29	28	19	27	27
VPS72	4063	6233	4893	6128	6703	6758	5817	6546	6631	6136	5689	5490	7480	6992	7131	9087	8239	8454	7652	7892	7203	8604	7469	7897
PIP5K1A	9063	10132	6686	7907	8714	9405	7902	8248	8543	8701	8116	9147	10848	9573	10004	9181	11805	11230	10747	10521	9900	12389	10230	11576
PSMD4	9372	10233	6163	6331	6558	7028	4142	4362	4629	4381	4262	5299	4843	4524	4314	6887	6304	5502	5264	5419	5080	6098	5327	5511
ZNF687	3206	3775	2474	3303	3786	4045	3485	4232	3986	3919	3168	4104	4480	4830	4006	4212	4678	4976	4693	4544	4108	5004	4147	4172
PI4KB	7433	9116	6941	7859	9312	9195	7304	7993	8517	8119	7143	7956	9179	8535	8782	9807	10523	10084	9695	9486	9331	10965	8791	10329
RFX5	4627	4884	4069	4496	4883	4948	4250	4450	4465	4233	3943	4555	4976	4409	4760	4287	5390	4772	4976	4653	4443	4983	4126	4749
SELENBP1	737	892	700	813	917	1006	923	898	864	694	867	759	885	715	844	965	855	770	767	830	678	828	679	769
PSMB4	12966	17422	13921	17107	19396	18695	16137	17095	16931	16478	14073	14837	18861	18268	18538	25303	21374	18719	20259	19477	17821	21271	17399	18887
POGZ	6005	6229	5105	5920	6883	6885	6552	7095	7633	6719	6043	7326	7970	7634	7546	5665	8449	7877	7751	7597	7354	8480	7332	8082
CGN	2070	2060	1501	1511	1697	1797	1469	1567	1592	1367	1353	1337	1767	1459	1522	1652	1835	1424	1717	1516	1537	1840	1517	1466
TUFT1	796	944	847	1275	1378	1328	1311	1438	1544	1570	1447	1441	1668	1634	1647	1735	1832	1969	1852	1718	1689	1898	1639	1747
MIR554	0	0	0	0	0	2	0	0	0	0	0	0	2	0	0	0	0	0	5	0	0	0	0	0
SNX27	4972	5720	4519	4841	5441	5217	4511	4905	5149	5120	4911	5511	6293	6065	5688	5489	6837	6372	5928	5764	5816	7041	6132	6528
CELF3	26	30	22	28	14	26	37	18	11	22	60	25	32	38	20	66	27	35	58	39	31	68	59	26
RIIAD1	0	0	0	0	2	0	0	0	0	0	1	4	1	0	0	4	0	0	0	0	0	0	0	0
MRPL9	4185	5653	4635	5431	5819	5503	4611	5036	5251	4844	4481	4827	5870	5788	5473	7124	6555	6054	5677	5774	5314	6358	5411	5801
OAZ3	44	82	92	67	96	77	73	59	66	59	56	80	60	76	95	113	74	93	65	99	36	91	59	72
TDRKH	855	1240	829	983	1039	1003	775	1019	771	877	781	702	849	833	893	853	1150	872	820	883	890	1063	989	956
LINGO4	0	0	0	0	0	0	0	0	0	0	0	0	0	0	0	0	0	0	0	0	0	0	0	0
RORC	0	0	0	0	0	0	0	0	0	0	0	0	0	0	0	0	0	0	0	0	2	0	0	0
C2CD4D	0	1	0	3	0	0	0	0	0	0	0	0	0	0	0	0	0	0	0	0	1	0	0	1
C2CD4D-AS1	0	0	0	0	0	0	0	2	0	0	0	0	0	0	2	0	0	0	0	0	8	0	0	0
THEM5	0	0	0	0	0	4	0	0	0	0	0	0	0	0	0	0	0	0	0	0	0	0	0	0
THEM4	1215	1542	1142	1245	1531	1506	1434	1452	1487	1342	1269	1261	1559	1779	2012	2139	2037	1706	1958	1745	1820	2126	1542	1750
S100A10	2550	2847	1639	1605	1714	1891	1354	1501	1324	1582	1257	1518	1600	1672	1340	2233	2191	1510	1503	1412	1535	1568	1719	1435
NBPF18P	0	0	0	0	0	0	0	0	0	0	0	0	0	0	0	0	7	0	0	0	0	0	0	0
S100A11	1061	1496	1314	1311	1476	1498	1396	1253	1370	1323	1028	1150	1131	1358	1389	1619	1487	1482	1457	1455	1307	1275	1270	1250
LOC100131107	0	0	0	0	0	0	0	0	0	0	0	0	0	0	0	0	0	0	0	0	0	0	0	0
TCHHL1	0	0	0	0	0	0	0	0	0	0	0	0	0	0	0	0	0	0	0	0	0	0	0	0
TCHH	10	18	12	2	18	12	20	4	20	28	14	0	16	6	18	10	36	8	0	34	8	2	14	0
RPTN	0	0	0	0	0	0	0	0	0	0	0	0	0	0	0	0	0	0	0	0	0	0	0	0
HRNR	0	0	0	4	0	0	0	0	0	0	0	0	0	0	0	0	0	0	0	0	0	0	0	0
FLG	0	2	0	4	4	0	0	0	0	0	0	0	4	0	0	0	4	0	0	0	0	0	0	0
FLG-AS1	0	0	0	0	0	0	0	0	0	0	0	0	0	0	0	2	0	0	0	0	1	0	0	0
FLG2	0	0	10	0	0	0	0	0	0	0	0	0	0	0	0	0	0	0	1	0	0	0	0	0
CRNN	0	0	0	0	0	0	0	0	0	0	0	0	0	0	0	0	0	0	0	0	0	0	0	0
LCE5A	0	0	0	0	0	0	0	0	0	0	0	0	0	0	0	0	0	0	0	0	0	0	0	0
CRCT1	0	0	0	0	0	0	0	0	0	0	0	0	0	0	0	0	0	0	0	0	0	0	0	0
LCE3E	0	0	0	0	0	0	0	0	0	0	0	0	0	0	0	0	0	0	0	0	0	0	0	0
LCE3D	0	0	0	0	0	0	0	0	0	0	0	0	0	0	0	0	0	0	0	0	0	0	0	0
LCE3C	0	0	0	0	0	0	0	0	0	0	0	0	0	0	0	0	0	0	0	0	0	0	0	0
LCE3B	0	0	0	0	0	0	0	0	0	0	0	0	0	0	0	0	0	0	0	0	0	0	0	0
LCE3A	0	0	0	0	0	0	0	0	0	0	0	0	0	0	0	0	0	0	0	0	0	0	0	0
LCE2D	0	0	0	0	0	0	0	0	0	0	0	0	0	0	0	0	0	0	0	0	0	0	0	0
LCE2C	0	0	0	0	0	0	0	0	0	0	0	0	0	0	0	0	0	0	0	0	0	0	0	0
LCE2B	0	0	0	0	0	0	0	0	0	0	0	0	0	0	0	0	0	0	0	0	0	0	0	0
LCE2A	0	0	0	0	0	0	0	0	0	0	0	0	0	0	0	0	0	0	0	0	0	0	0	0
LCE4A	0	0	0	0	0	0	0	0	0	0	0	0	0	0	0	0	0	0	0	0	0	0	0	0
KPLCE	0	0	0	0	0	0	0	0	0	0	0	0	0	0	0	0	0	0	0	0	0	0	0	0
KPRP	0	0	0	0	0	0	0	0	0	0	0	0	0	0	0	0	0	0	0	0	0	0	0	0
LCE1F	0	0	0	0	0	0	0	0	0	0	0	0	0	0	0	0	0	0	0	0	0	0	0	0
LCE1E	0	0	0	0	0	0	0	0	0	0	0	0	0	0	0	0	0	0	0	0	0	0	0	0
LCE1D	0	0	0	0	0	0	0	0	0	0	0	0	0	0	0	0	0	0	0	0	0	0	0	0
LCE1C	0	0	0	0	0	0	0	0	0	0	0	0	0	0	0	0	0	0	0	0	0	0	0	0
LCE1B	0	0	0	0	0	0	0	0	0	0	0	0	0	0	0	0	0	0	0	0	0	0	0	0
LCE1A	0	0	0	0	0	0	0	0	0	0	0	0	0	0	0	0	0	0	0	0	0	0	0	0
LCE6A	0	0	0	0	0	0	0	0	0	0	0	0	0	0	0	0	0	0	0	0	0	0	0	0
SMCP	0	0	0	0	0	0	0	0	0	0	0	0	0	0	0	0	0	0	0	0	0	0	0	0
IVL	0	0	0	0	0	0	0	0	0	0	0	0	0	0	0	0	0	0	0	0	0	0	0	0
SPRR4	0	0	0	0	0	0	0	0	0	0	0	0	0	0	0	0	0	0	0	0	0	0	0	0
SPRR1A	0	0	0	0	0	0	0	0	0	0	0	0	0	0	0	0	0	0	0	0	0	0	0	0
SPRR3	0	0	0	0	0	0	0	0	0	0	0	0	0	0	0	0	0	0	0	0	0	0	0	0
SPRR1B	0	0	0	0	0	0	0	0	0	0	0	0	0	0	0	0	0	0	0	0	0	0	0	0
SPRR2D	0	0	0	0	0	0	0	0	0	0	0	0	0	0	0	0	0	0	0	0	0	0	0	0
SPRR2A	0	0	0	0	0	0	0	0	0	0	0	0	0	0	0	0	0	0	0	0	0	0	0	0
SPRR2B	0	0	0	0	0	0	0	0	0	0	0	0	0	0	0	0	0	0	0	0	0	0	0	0
SPRR2E	0	0	0	0	0	0	0	0	0	0	0	0	0	0	0	0	0	0	0	0	0	0	0	0
SPRR2F	8	16	30	6	6	10	5	0	4	4	2	4	5	10	7	0	22	22	4	2	4	6	6	12
SPRR2C	0	0	0	0	0	0	0	0	0	0	0	0	0	0	0	0	0	0	0	0	0	0	0	0
SPRR2G	0	0	0	0	0	0	0	0	0	0	0	0	0	0	0	0	0	0	0	0	0	0	0	0
LOC101928009	0	0	0	0	0	0	0	0	0	0	0	0	0	0	0	0	0	0	0	0	0	0	0	0
LELP1	0	0	0	0	0	0	0	0	0	0	0	0	0	0	0	0	0	0	0	0	0	0	0	0
PRR9	0	0	0	0	0	0	0	0	0	0	0	0	0	0	0	0	0	0	0	0	0	0	0	0
LORICRIN	0	0	0	0	0	0	0	0	0	0	0	0	0	0	0	2	0	0	0	0	0	0	0	0
PGLYRP3	0	0	0	0	0	0	0	0	0	0	0	0	0	0	0	0	0	0	0	0	0	0	0	0
PGLYRP4	0	0	0	0	0	0	0	0	0	0	0	0	0	0	0	0	0	0	0	0	0	0	0	0
S100A9	0	0	0	0	0	0	0	0	0	0	0	0	0	0	0	0	0	0	0	0	0	0	0	0
S100A12	0	0	0	0	0	0	0	0	0	0	0	0	0	0	0	0	0	0	0	0	0	0	0	0
S100A8	0	0	0	0	0	0	0	0	0	0	0	0	0	0	0	0	0	0	0	2	0	0	0	0
S100A7A	0	0	0	0	0	0	0	0	0	0	0	0	0	0	0	0	0	0	1	0	0	0	0	0
S100A7L2	0	0	0	0	0	0	0	0	0	0	0	0	0	0	0	0	0	0	0	0	0	0	0	0
S100A7	0	0	0	0	0	0	0	0	0	0	0	0	0	0	0	0	0	0	0	0	0	0	0	0
S100A6	0	0	0	0	0	0	0	0	0	0	0	0	0	0	0	0	0	0	0	0	0	0	0	0
S100A5	0	0	0	0	0	0	0	0	0	0	0	0	0	0	0	0	0	4	0	0	0	0	0	0
S100A4	41	28	60	33	36	54	64	25	51	31	24	56	50	55	48	56	22	47	52	56	43	27	51	60
LOC101928034	0	0	0	0	0	0	0	0	0	0	0	0	0	0	0	0	0	0	0	0	0	0	0	0
S100A3	0	0	0	0	0	0	0	0	0	0	0	0	0	0	0	0	0	2	0	3	0	0	0	0
S100A2	8	2	1	0	0	2	2	4	2	0	1	0	1	8	4	25	0	0	6	4	0	2	26	0
S100A16	12	6	2	4	2	18	2	2	8	2	0	0	0	8	0	4	0	6	0	0	6	10	14	4
S100A14	4	0	0	0	1	0	0	6	0	1	0	0	0	4	0	12	0	0	2	0	0	12	8	0
S100A13	1160	1444	1211	1354	1543	1468	1292	1526	1416	1148	1003	1200	1616	1476	1256	2245	1495	1523	1530	1516	1488	1683	1342	1621
S100A1	45	44	14	65	36	41	70	30	67	31	65	50	52	39	47	60	34	51	38	29	49	44	30	30
CHTOP	7530	9592	7588	8773	9980	10124	8151	9449	10155	9290	8133	9022	10524	10478	10760	13583	12706	11084	10653	10972	10606	11962	10933	11207
SNAPIN	2128	2762	2399	2715	3051	2899	2721	2637	2973	2479	2612	2350	2874	2731	2847	3499	3543	3096	2842	3108	2918	3494	2834	2992
ILF2	23251	31962	26100	30819	33849	32429	28719	32827	34377	32057	28354	30098	37015	37162	37418	45350	44696	37822	38374	41783	40384	47073	39178	41948
TRX-CAT1-1	0	0	0	0	0	0	0	0	0	0	0	0	0	0	0	0	0	0	0	0	0	0	0	0
NPR1	10	8	6	32	10	2	25	12	4	39	13	28	18	6	22	16	10	0	6	8	12	8	0	10
MIR8083	0	0	0	0	0	0	0	0	0	0	0	0	0	0	0	0	0	0	0	4	0	0	0	0
INTS3	2	3	2	0	1	8	0	0	6	0	3	7	1	0	0	3	0	0	0	0	0	14	1	0
SLC27A3	1	0	0	0	0	0	0	0	0	0	0	0	0	0	0	0	0	0	0	0	0	0	0	0
LOC343052	0	0	0	0	0	0	0	0	0	0	0	0	0	0	0	0	0	0	0	0	0	0	0	0
	0	0	0	0	0	0	1	0	0	0	0	0	0	0	0	0	0	0	0	0	0	0	0	0
GATAD2B	95	106	67	91	118	113	80	75	145	80	137	91	97	98	116	35	113	126	134	135	59	109	87	112
DENND4B	4535	4172	3763	4206	4125	4907	4179	3838	4350	3980	5129	4477	4834	4393	5327	4778	5713	4857	5898	4820	5042	5799	4595	4902
CRTC2	2233	2604	1884	2189	2565	2905	2178	2204	2588	2239	2285	2775	2772	2649	2951	3266	3283	3546	3395	2876	3171	3554	2581	2899
SLC39A1	6686	7624	4501	5089	4960	5485	3813	3844	3906	3637	3971	4199	4435	3825	4058	4889	4979	5202	4712	4226	4522	4969	4221	4649
MIR6737	0	0	0	0	0	0	0	0	0	0	0	0	0	0	0	0	0	0	0	0	0	0	3	0
CREB3L4	293	343	269	339	309	327	332	343	372	324	340	411	509	337	361	434	569	414	406	447	439	411	310	361
JTB	8224	10903	9279	10638	11425	11412	9575	9817	9075	8765	8333	8675	10210	9605	9672	12662	11038	10334	9990	10095	9401	10376	8939	10214
RAB13	1381	1581	1204	1560	1681	1840	1221	1719	1767	1367	1073	1152	1641	1551	1552	2118	1649	1629	1495	1660	1517	1743	1260	1754
RPS27	2991	2617	2172	2231	2589	2322	1437	1881	1483	1460	1391	1361	1642	1900	1234	2976	2012	2226	1403	1673	1541	1614	1920	1653
NUP210L	15	12	5	10	12	5	10	9	0	10	24	0	15	4	9	26	8	33	5	14	23	18	8	19
MIR5698	0	0	0	0	0	0	0	0	0	0	0	0	0	0	0	0	0	0	0	0	0	0	0	0
TPM3	18424	19134	9430	10149	10547	11512	7767	8295	8404	8134	7428	9085	9105	8284	7905	9252	11514	10466	9575	9326	9058	11017	10081	10787
MIR190B	0	0	0	0	0	0	0	0	0	0	0	0	0	0	0	0	0	0	0	0	0	0	0	0
CFAP141	0	1	0	10	8	0	5	6	0	16	0	0	5	14	12	4	22	0	0	3	0	0	0	2
C1orf43	12126	15837	12476	14241	15663	15193	13100	13514	14341	13048	11883	13164	15964	14607	14643	17199	16787	16015	15931	15889	15364	17722	15287	16231
UBAP2L	18718	17948	11169	12168	12815	13374	9789	9837	10803	10575	9679	11588	11849	11336	11743	10584	15295	13191	13487	13010	12881	14790	13034	14448
HAX1	5585	7587	5972	7779	8290	8354	6889	7677	7924	6896	6165	6864	8325	8369	7828	10453	9220	8513	8332	8497	8331	9583	7842	9034
AQP10	0	0	0	0	0	0	0	0	0	0	0	0	0	0	0	0	0	0	0	0	0	0	0	0
ATP8B2	7321	7341	4318	4915	4899	5573	4084	4451	4874	4655	4450	5173	5802	4873	5152	4368	6135	5949	6314	6009	5518	6527	5298	6522
IL6R	238	372	189	243	193	231	196	129	174	131	123	128	243	186	182	185	226	160	171	163	176	272	188	186
SHE	0	0	0	0	0	0	0	0	0	0	0	0	0	0	0	0	0	1	0	0	0	0	0	0
TDRD10	0	0	0	0	0	0	0	0	0	0	0	0	0	0	1	0	0	0	3	0	0	0	0	0
UBE2Q1	5141	5494	3104	3187	3482	3764	2647	2803	3228	2750	2485	3456	3273	3258	3132	3834	4141	4033	3515	3320	3440	3968	3616	4079
UBE2Q1-AS1	8	16	13	11	8	19	5	10	42	17	9	5	9	13	20	12	6	7	21	13	11	18	16	13
CHRNB2	1	4	8	0	12	22	6	2	12	0	10	10	6	22	10	34	6	16	24	12	32	4	5	16
ADAR	22270	17478	7756	8205	8442	9375	6255	6657	7241	7093	6747	8803	8739	8390	8049	6599	10887	10486	9494	10480	10280	12167	10651	11789
KCNN3	88	106	72	86	114	113	98	90	62	57	54	99	70	103	116	63	110	141	87	100	72	90	83	157
PMVK	1307	1745	1494	1674	1598	1882	1495	1387	1370	1459	1351	1338	1457	1563	1428	2313	1623	1542	1492	1724	1310	1782	1588	1290
PBXIP1	627	768	699	774	851	806	621	780	735	564	518	531	626	548	647	678	693	581	608	605	608	743	776	552
PYGO2	3562	4477	3398	4060	4417	5061	4137	4634	4861	4749	4496	4754	6198	5332	5699	5817	6296	6199	6055	6059	5541	6530	5071	5516
LOC101928120	43	54	42	81	72	60	49	73	41	52	77	82	76	63	71	59	69	77	83	69	72	66	63	55
SHC1	2862	3592	2402	2864	3150	3236	2774	2931	3285	2853	2871	2876	3575	3433	3202	3253	4519	3802	3959	3750	3769	4251	3734	3630
CKS1B	2152	2798	2492	3317	3293	3313	3020	3265	3641	3008	2804	2977	3431	3365	3371	4562	3846	3372	3524	3638	3532	4362	3532	3914
MIR4258	4	2	2	2	12	10	5	9	10	6	14	10	22	10	0	8	6	22	5	26	10	7	6	6
FLAD1	3246	4002	3220	4240	4591	4868	3921	4651	4862	4357	4157	4142	5298	4972	5437	6147	5743	5546	5936	5455	5253	6096	4747	4929
LENEP	8	0	0	4	0	2	7	0	0	4	0	2	0	6	0	0	4	1	4	6	0	8	1	14
ZBTB7B	888	894	714	859	992	1246	996	949	1002	917	986	1105	1212	1016	968	885	1034	1032	1042	1092	1033	1068	949	1108
DCST2	7	5	15	22	4	15	29	18	4	34	39	12	16	11	9	45	4	4	30	26	22	18	40	6
DCST1	10	16	14	29	26	19	36	17	12	5	6	13	15	6	9	35	26	7	4	4	14	0	4	4
DCST1-AS1	81	88	55	70	40	87	65	77	108	74	60	88	70	96	53	136	37	88	122	59	54	62	19	41
ADAM15	3104	2959	2034	2265	2219	2410	1927	1487	2047	1563	2080	1601	1897	1786	1929	2245	2325	1963	2202	1911	1865	2414	1925	2066
EFNA4	250	371	337	346	421	460	431	480	594	487	453	521	531	400	512	643	526	547	440	499	460	543	428	528
EFNA3	602	824	633	777	881	882	753	801	995	833	848	969	964	1011	864	982	942	951	870	914	856	891	943	901
EFNA1	490	565	666	869	748	916	864	1141	938	1008	828	754	938	1102	1013	1084	927	956	1000	892	785	802	769	864
SLC50A1	1529	1960	1520	2145	1908	2003	2002	1824	2256	1911	1698	1709	2318	1995	2251	2791	2515	2401	2379	2414	2265	2715	2139	2275
DPM3	733	913	913	968	1154	1084	859	884	983	695	876	954	940	1062	1036	1557	977	1051	1033	1134	1020	906	968	984
KRTCAP2	2341	3100	2405	2962	2892	3172	2359	2585	2704	2335	2536	2396	2719	2741	2731	4066	3511	3100	3058	3301	2585	3354	2857	3162
TRIM46	97	44	31	41	66	91	42	77	61	39	60	75	91	57	131	114	91	66	151	105	128	99	38	80
MUC1	29	36	16	33	45	48	36	39	39	31	51	60	43	26	43	48	24	33	4	47	18	43	32	54
MIR92B	0	0	0	0	3	0	0	0	0	0	0	1	0	0	0	0	0	0	0	0	0	0	0	7
THBS3	354	216	224	321	293	330	345	309	369	313	429	361	327	252	337	440	268	335	426	301	352	416	216	388
MTX1	1321	1469	1149	1292	1601	1372	1306	1283	1318	1226	1367	1060	1395	1382	1266	1803	1607	1672	1548	1584	1531	1672	1483	1758
GBA1LP	59	40	18	37	29	30	73	65	78	40	74	73	12	46	61	51	31	87	54	46	59	92	72	43
GBA1	157	147	48	40	23	29	47	38	22	58	16	58	34	42	66	37	103	68	20	78	56	78	82	60
ENTREP3	2	5	0	2	0	1	1	4	2	1	2	1	0	1	2	3	3	0	4	0	1	0	0	2
SCAMP3	2	0	0	0	3	2	2	1	0	0	0	7	1	2	0	0	0	0	3	1	0	0	0	1
CLK2	0	1	0	1	0	0	1	3	1	2	1	1	4	0	1	2	0	0	2	0	0	2	1	0
HCN3	0	0	0	0	0	0	0	0	0	0	0	1	0	0	0	0	0	0	0	0	0	0	0	0
PKLR	0	0	0	0	0	0	0	0	0	0	0	0	0	0	0	0	0	0	0	0	0	0	0	0
FDPS	6841	7496	4772	5301	5536	5726	4458	4546	4615	4095	4579	4434	4903	4202	4299	5939	5644	5062	4395	4611	4546	5156	4423	4810
RUSC1-AS1	16	5	2	16	12	12	12	12	21	2	20	6	20	22	25	2	11	0	8	24	0	10	15	14
RUSC1	3094	3952	3157	3727	3825	4221	3027	3353	3622	3067	3224	3200	3755	3206	3830	3568	3502	3242	3518	3516	3526	3558	2691	3168
ASH1L	4628	4856	3423	3378	4002	4024	3529	3692	3797	3405	3386	4374	4080	4047	3987	2624	5472	4570	4109	4678	4457	5371	5093	5036
MIR555	0	0	0	0	0	0	0	0	0	0	4	0	0	0	0	0	0	0	0	0	0	0	0	0
POU5F1P4	0	0	2	2	0	0	0	4	3	0	0	0	0	0	0	0	0	0	4	0	0	0	0	9
ASH1L-AS1	163	158	86	139	113	127	156	179	160	135	105	177	163	147	155	143	74	137	231	179	131	138	154	133
MSTO1	1663	2029	1347	1611	1546	1858	1535	1782	2039	1634	2006	1751	2204	1927	2303	2558	2460	2206	2211	2376	2535	2593	1956	2262
YY1AP1	3342	3866	3204	3807	4290	4838	3971	4200	4473	4704	4171	4740	5426	5353	6150	5807	5961	5661	5978	5445	5152	6463	5034	5669
DAP3	4873	6139	4679	5749	6012	5874	4859	5439	6173	4942	4541	5143	6050	6230	5830	7307	6556	5856	6047	6038	6290	6467	6031	6278
MSTO2P	402	331	332	407	488	511	590	573	710	526	818	506	631	717	854	675	706	788	791	671	903	930	773	815
GON4L	2549	2359	1780	1843	2318	2465	2072	2083	2329	1877	1771	2153	2191	2378	2630	1820	2743	2494	2558	2748	2611	3001	2538	2770
SYT11	57	70	52	72	69	56	61	38	50	36	44	70	88	48	28	42	96	108	66	60	92	113	78	107
RIT1	1042	1364	1202	1514	1849	1579	1623	1768	2139	1926	1552	1773	2128	1987	1890	2102	2210	2019	1979	2090	2021	2039	2001	2116
KHDC4	3322	3382	3061	3861	4598	4984	4500	4547	5458	4536	5115	4684	5508	4536	5384	4663	5371	4653	5557	5071	4918	5733	4351	5702
SNORA80E	0	4	6	4	0	2	5	5	5	1	1	0	6	2	2	0	12	4	3	6	5	0	0	7
SCARNA4	0	12	2	0	0	2	0	3	9	10	0	0	2	1	0	3	3	0	7	5	3	12	0	0
RXFP4	0	0	0	0	0	0	0	0	0	0	0	2	0	0	0	0	0	0	0	0	0	0	0	0
ARHGEF2	3777	3950	2282	2699	3127	3355	2413	2664	2755	2746	2472	2867	3407	2957	3188	2616	3364	3418	3145	3083	3163	3668	3027	3138
MIR6738	0	0	0	0	0	0	0	0	0	0	0	0	2	0	0	0	0	0	0	0	0	0	0	0
LOC105371729	11	14	3	3	3	3	1	12	6	1	1	3	6	10	11	18	25	7	5	7	28	0	4	22
SSR2	8016	11196	8719	10906	12397	12634	11313	12260	12493	12554	11420	13114	15856	15656	16170	20665	20185	19136	18460	18553	18038	21272	18743	19896
UBQLN4	4986	6758	4819	5158	5520	5511	4519	4628	5311	4818	4872	4969	5714	5567	5526	6066	7322	5955	6650	5856	5900	6961	6341	6178
LAMTOR2	1450	1821	1509	1849	1879	1907	1557	1689	1818	1547	1331	1300	1800	1809	1606	2865	2042	1746	1801	1666	1568	1898	1542	1585
RAB25	8	14	32	4	16	2	8	12	4	16	0	6	10	16	10	9	10	4	11	4	6	2	0	8
MEX3A	2154	2362	1577	2100	2373	2305	1995	2103	2100	1838	1958	2171	2466	2234	2487	2053	2552	2316	2199	2208	2115	2217	1907	2261
LMNA	2892	3045	1841	1902	1906	2059	1464	1324	1483	1449	1326	1588	1723	1605	1584	2103	2072	2092	1784	1813	1578	2199	1751	1915
SEMA4A	60	63	21	74	41	60	104	34	66	43	123	58	122	77	85	84	57	112	97	54	52	77	52	61
SLC25A44	2581	2238	1186	1351	1605	1943	1479	1609	1929	1647	1553	2022	2244	2081	1943	1987	2701	2490	2523	2135	2179	2687	2425	2394
PMF1	1175	1277	617	627	471	591	480	405	464	423	355	430	479	453	382	749	532	451	529	394	450	548	364	522
PMF1-BGLAP	0	0	0	0	0	0	0	0	0	0	0	0	0	0	0	0	0	0	0	0	0	0	0	0
BGLAP	3	4	5	2	5	0	6	12	12	1	4	0	9	0	4	5	3	15	0	5	0	12	4	0
PAQR6	132	91	144	118	143	150	171	190	181	218	183	120	211	204	210	253	264	155	154	150	225	145	84	198
SMG5	12749	12403	7148	7892	8401	10025	6636	7006	7093	6770	7852	8420	8666	7348	8385	9308	9998	9052	10034	8968	9366	11308	9177	10495
TMEM79	266	473	375	356	403	543	387	428	410	324	448	485	355	444	458	379	465	470	483	351	479	409	401	386
GLMP	2106	2846	1745	2305	2011	2203	1771	1783	1785	1707	1578	1580	1963	1545	1605	2115	2153	2075	1909	1802	1698	1977	1830	1911
VHLL	0	2	6	0	2	8	0	0	0	2	0	0	0	0	8	16	2	12	0	0	0	0	0	4
CCT3	45906	38926	17732	18156	20101	21354	13448	14090	14847	14643	14824	17608	17895	15483	15822	20336	20912	20441	18904	18381	18241	23411	19751	21641
TSACC	88	118	147	192	163	156	135	155	91	165	148	135	178	172	192	184	170	118	175	150	161	137	286	137
RHBG	5	1	0	0	0	2	2	13	8	0	10	0	2	0	8	4	0	0	0	0	3	0	10	0
MIR9-1HG	15	24	16	18	30	10	23	23	12	21	14	16	15	41	58	34	53	24	45	35	51	42	55	51
MIR9-1	0	0	0	0	0	0	0	0	0	0	0	0	0	0	0	0	0	0	0	0	0	0	0	0
MEF2D	1531	1487	954	1094	1190	1434	1053	1199	1270	1112	1307	1252	1300	1270	1348	1287	1651	1452	1478	1337	1229	1572	1226	1326
IQGAP3	2811	1955	1817	2004	1800	2062	1935	2041	2023	1738	2310	2206	1978	1916	2206	1569	2139	1728	2421	2055	2182	2463	1856	2422
TTC24	6	0	2	4	2	6	2	0	8	8	0	2	4	0	7	6	4	10	0	8	14	4	0	4
NAXE	6372	7295	4213	4304	4483	4704	3115	2916	3087	3154	2586	3348	3293	2995	2897	4554	3760	3682	3649	3543	3218	4327	3226	3854
GPATCH4	7432	8537	6492	7478	7629	7847	6212	7171	7510	6756	6249	6821	8086	8220	8019	10697	9393	8495	7955	8886	8123	9516	7468	8856
LOC101928177	10	2	0	0	0	2	1	0	0	0	0	0	2	1	0	0	0	0	12	0	0	0	0	8
HAPLN2	18	25	8	9	12	17	14	10	17	11	16	4	18	6	8	41	44	14	16	35	25	28	1	22
BCAN	12	0	8	2	0	2	2	12	2	0	10	4	0	2	0	4	0	12	2	6	8	6	0	0
NES	327	359	166	260	210	278	204	251	270	203	245	162	189	217	204	219	222	236	268	234	156	325	279	188
CRABP2	1236	1895	1578	1791	1902	2200	1594	1690	1758	1487	1462	1473	2049	1756	1557	2003	2104	1858	1897	1611	1626	1993	1499	1507
ISG20L2	5964	7805	6444	7267	8720	8802	8148	8883	9809	8788	8021	8795	11237	10872	10641	11336	12410	10911	10441	10787	10403	12446	10382	10781
METTL25B	1137	1263	792	1100	1165	1312	1297	1061	1123	1042	997	1431	1291	1208	1250	1435	1365	1395	1415	1267	1290	1354	1197	1227
MRPL24	3109	3665	3188	3525	3747	3620	3175	3450	3048	3422	2700	2580	3579	3369	3499	5287	4118	3827	3353	3639	3500	3998	3252	3512
HDGF	24261	29257	17879	21047	22728	23103	15492	16394	15786	15837	15158	16230	16927	15209	15834	19333	20131	19232	17715	16752	15906	19256	16289	16851
PRCC	8363	9826	7070	7976	9018	9267	7843	7577	8709	8009	7461	8234	9230	9251	9296	11133	11627	10380	10184	10376	9864	11222	9822	10624
SH2D2A	255	261	296	388	360	375	396	402	453	451	310	438	568	503	503	665	555	585	636	718	465	666	449	435
NTRK1	12	5	22	22	11	10	13	0	2	17	17	18	22	9	25	22	19	4	25	18	16	12	19	7
INSRR	9	0	0	0	0	0	2	0	0	4	1	0	9	0	9	7	4	2	8	0	0	1	8	0
PEAR1	0	0	2	0	2	4	6	2	0	0	0	1	2	0	8	0	0	6	0	2	4	0	0	2
LRRC71	6	3	6	4	3	12	7	8	42	16	12	13	2	10	8	15	5	8	15	4	19	18	0	3
ARHGEF11	3239	2687	1554	1841	2236	2370	1616	1606	2008	1801	1902	2068	2172	2088	2184	1793	2926	2288	2326	2093	2252	2419	2301	2607
MIR765	6	0	0	0	5	0	0	0	0	0	2	0	0	1	0	7	0	0	1	0	0	0	0	0
ETV3L	0	3	2	0	4	4	0	0	5	2	2	3	4	4	1	0	0	0	8	10	11	1	2	0
ETV3	2103	2799	2211	2635	3163	3291	2883	3190	3080	2938	2412	3053	3595	3526	3494	2682	3729	3550	3365	3750	3557	4056	3587	4020
CYCSP52	0	1	0	3	0	0	4	4	16	0	4	0	6	2	2	0	2	0	0	0	0	13	0	3
FCRL5	0	0	0	0	0	0	0	0	0	0	0	0	0	0	0	0	0	0	0	0	0	0	0	0
FCRL4	0	0	0	0	0	0	0	0	0	0	0	0	0	0	0	0	0	0	0	0	0	0	0	0
FCRL3	0	0	0	0	0	2	0	0	0	0	0	0	0	0	0	0	0	0	0	0	0	2	0	0
FCRL2	0	0	0	0	0	0	0	0	0	0	0	0	0	0	0	0	0	0	0	0	0	0	0	0
FCRL1	0	0	0	0	0	0	0	0	0	0	0	0	0	0	0	0	0	0	0	0	0	0	0	0
CD5L	0	0	0	0	0	0	0	0	0	0	0	0	0	0	0	0	0	0	0	0	0	0	0	0
KIRREL1	2885	3189	2433	2138	2453	2531	1691	2076	2684	1935	2101	2159	2455	2370	2470	1930	3151	2665	2638	2710	2558	3050	2236	2921
LINC01704	0	0	0	0	0	0	0	0	0	0	0	0	0	0	0	0	0	0	0	0	0	0	0	0
CD1D	14	21	12	32	29	31	26	62	16	20	24	10	20	30	16	42	28	10	24	20	20	18	26	32
CD1A	0	0	0	0	0	0	0	0	0	0	0	0	0	0	0	0	0	0	0	0	0	0	0	0
CD1C	0	0	0	0	0	0	0	0	0	0	0	0	0	0	0	0	0	0	0	0	0	0	0	0
CD1B	0	0	0	0	0	0	0	0	0	0	0	0	0	0	0	0	0	0	0	0	0	0	0	0
CD1E	0	0	0	0	0	0	0	0	0	0	0	0	0	0	0	0	0	0	0	0	0	0	0	0
OR10T2	0	0	0	0	0	0	0	0	0	0	0	0	0	0	0	0	0	0	0	0	0	0	0	0
OR10K2	0	0	0	0	0	0	0	0	0	0	0	0	0	0	0	0	0	0	0	0	0	0	0	0
OR10K1	0	0	0	0	0	0	0	0	0	0	0	0	0	0	0	0	0	0	0	0	0	0	0	0
OR10R2	0	0	0	0	0	0	0	0	0	0	0	0	0	0	0	0	0	0	0	0	0	0	0	0
OR6Y1	0	0	0	0	0	0	0	0	0	0	0	0	0	0	0	0	0	0	0	0	0	0	0	0
OR6P1	0	0	0	0	0	0	0	0	0	0	0	0	0	0	0	0	0	0	0	0	0	0	0	0
OR10X1	0	0	0	0	0	0	0	0	0	0	0	0	0	0	0	0	0	0	0	0	0	0	0	0
OR10Z1	0	0	0	0	0	0	0	0	0	0	0	0	0	0	0	0	0	0	0	0	0	0	0	0
SPTA1	0	0	0	0	0	0	0	0	0	0	0	0	0	0	0	0	0	0	0	0	0	0	0	0
OR6K2	0	0	0	0	0	0	0	0	0	0	0	0	0	0	0	0	0	0	0	0	0	0	0	0
OR6K3	0	0	0	0	0	0	0	0	0	0	0	0	0	0	0	0	0	0	0	0	0	0	0	0
OR6K6	0	0	0	0	0	0	0	0	0	0	0	0	0	0	0	0	0	0	0	0	0	0	0	0
OR6N1	0	0	0	0	0	0	0	0	0	0	0	0	0	0	0	0	0	0	0	0	0	0	0	0
OR6N2	0	0	0	0	0	0	0	0	0	0	0	0	0	0	0	0	0	0	0	0	0	0	0	0
MNDA	0	0	0	0	0	0	0	0	0	0	0	0	0	0	0	0	0	0	0	0	0	0	0	0
PYHIN1	0	0	0	0	0	0	0	0	0	0	0	0	0	0	0	0	0	0	0	0	0	0	0	4
IFI16	0	4	13	2	8	2	2	8	4	4	6	2	2	2	0	8	0	6	12	4	6	0	19	0
AIM2	0	0	0	0	0	0	0	0	0	0	0	0	0	0	0	0	0	0	0	0	0	0	0	0
TRR-TCT4-1	0	0	0	0	0	0	0	0	0	0	0	0	0	0	0	0	0	0	0	0	0	0	0	0
CADM3	0	0	0	0	0	0	0	0	0	0	0	0	0	0	0	0	0	0	0	0	0	0	0	0
CADM3-AS1	0	0	0	0	0	0	0	0	0	0	0	0	0	0	0	0	0	0	0	0	0	0	0	0
ACKR1	0	0	0	0	0	0	0	0	0	0	0	0	0	0	0	0	0	0	0	0	0	0	0	0
FCER1A	0	0	0	0	0	0	0	0	0	0	0	0	0	0	0	0	0	0	0	0	0	0	0	0
OR10J3	0	0	0	0	0	0	0	0	0	0	0	0	0	0	0	0	0	0	0	0	0	0	0	0
OR10J1	0	0	0	0	0	0	0	0	0	0	0	0	0	0	0	0	0	0	0	0	0	0	0	0
OR10J5	0	0	0	0	0	0	0	0	0	0	0	0	0	0	0	0	0	0	0	0	0	0	0	0
APCS	0	0	0	0	0	0	0	0	0	0	0	0	0	0	0	0	0	0	0	0	0	0	0	0
CRP	0	0	0	0	0	0	0	0	0	0	0	0	0	0	0	0	0	0	0	0	0	0	0	0
DUSP23	23	13	32	35	59	46	32	12	26	8	24	18	30	16	24	80	16	60	14	28	43	46	38	14
FCRL6	0	0	0	0	0	0	0	0	0	0	0	0	0	0	0	0	0	0	0	0	0	0	0	0
SLAMF8	0	0	0	0	0	0	0	0	0	0	1	0	0	2	0	0	0	7	0	0	0	0	0	0
SNHG28	0	4	0	0	0	0	4	0	6	0	0	18	1	0	7	0	3	0	0	0	8	0	8	0
VSIG8	0	6	0	0	0	0	18	0	6	0	0	0	0	7	0	0	0	4	0	0	0	0	0	0
CFAP45	22	20	0	22	12	26	4	22	25	18	40	14	12	21	62	6	27	6	17	17	27	30	16	28
MIR4259	0	0	0	0	0	0	0	0	0	0	0	0	0	0	0	0	0	3	0	0	0	0	0	0
TAGLN2	16695	22252	16349	18184	19816	19847	15254	16362	16457	15477	13946	14564	16540	16032	15689	20146	19978	17459	16892	16131	14967	18856	15474	15424
IGSF9	123	94	38	76	95	131	164	101	88	73	141	64	107	79	80	139	136	112	150	129	120	119	79	81
SLAMF9	0	0	0	0	0	0	0	0	0	0	0	0	0	0	0	0	0	0	0	0	0	0	0	0
LINC01133	0	0	0	0	0	0	0	0	0	0	0	0	0	0	0	0	0	0	0	0	0	0	0	0
PIGM	2190	2463	1753	2250	2449	2554	2274	2147	2276	2206	2143	2432	3047	2453	2644	2184	2921	2657	2697	2493	2820	3071	2605	2630
KCNJ10	6	6	0	8	2	4	24	16	26	3	14	10	18	22	34	20	70	10	0	9	16	7	6	4
KCNJ9	0	0	0	0	4	0	2	2	4	0	0	0	0	0	6	4	0	3	0	5	4	10	8	0
IGSF8	1492	1574	791	869	1012	996	723	692	662	727	844	828	869	909	758	1039	941	1128	917	988	755	1229	1061	909
ATP1A2	12	0	0	0	0	0	0	0	0	0	0	0	0	0	0	0	0	0	0	0	0	0	8	0
ATP1A4	0	0	0	0	0	0	0	0	0	0	0	0	1	0	0	0	0	0	0	0	2	0	0	0
CASQ1	0	8	0	10	12	2	6	4	16	6	0	1	10	4	2	10	9	4	0	4	0	2	0	12
LOC729867	17	20	24	36	31	29	63	39	22	22	35	11	36	42	23	29	19	32	67	25	36	28	13	24
PEA15	4736	5667	4583	5251	5760	5937	4775	5830	5343	5228	5131	5241	6489	5970	5686	6385	6891	6589	6142	6567	6134	7399	6724	7068
DCAF8	4369	5062	4321	4923	5244	5487	4729	5274	5694	4475	4700	5055	6031	5846	6137	6266	6938	5848	6612	6170	6628	7079	5770	6525
PEX19	5785	6312	4183	4744	5226	4840	3468	4135	4067	3849	3403	3875	4161	4101	4052	3801	4807	4917	4239	4654	4261	5337	4426	4678
NHLH1	16	14	38	21	45	24	56	42	54	29	28	30	21	51	46	35	25	29	50	17	42	23	49	73
COPA	14289	17274	13263	14553	15110	14725	12553	13121	13896	12180	11701	12352	14575	13521	13571	11724	16809	15128	14885	15020	15369	17059	15407	16105
SUMO1P3	1190	1689	1348	1804	1851	1928	1485	1687	1607	1368	1302	1476	1834	1908	1531	2003	1894	1834	1491	1863	1640	1841	1541	1867
NCSTN	3946	4431	3919	3763	4395	4468	3748	3558	3820	3167	3398	3742	3798	3624	3515	3375	4726	4310	3884	4122	4014	4710	3788	4197
VANGL2	2560	3073	1885	1916	2012	1934	1738	1724	1830	1660	1359	1615	2009	1658	1746	1407	2120	2101	1974	2098	1890	2461	1936	2076
SLAMF6	0	0	0	0	0	0	0	0	0	0	0	0	0	0	0	0	0	0	0	0	0	0	0	0
CD84	0	0	0	0	0	0	0	0	0	0	0	0	0	0	0	0	0	0	0	0	0	0	0	0
SLAMF1	0	0	0	0	0	0	0	1	0	0	0	0	0	0	0	0	0	0	0	0	0	0	0	0
CD48	0	0	0	0	0	0	0	0	0	0	0	0	0	0	0	0	0	0	0	0	0	0	0	0
SLAMF7	0	0	0	0	0	0	0	0	0	0	0	0	0	0	0	0	0	0	0	0	0	0	0	0
LY9	0	0	0	0	0	0	0	0	0	0	0	0	0	0	0	0	2	0	0	0	0	0	0	0
CD244	0	0	0	0	0	0	0	0	0	0	0	0	0	0	0	0	0	0	0	0	0	0	0	0
ITLN1	2	0	0	0	0	0	0	0	0	0	0	0	0	0	0	0	0	0	0	0	0	0	0	0
LOC101928372	0	0	0	0	0	0	0	0	0	0	0	0	0	0	0	0	0	0	0	0	0	2	0	0
ITLN2	0	0	0	0	2	0	0	0	0	0	0	0	0	0	0	0	0	0	0	0	0	0	0	0
F11R	1339	1509	1340	1279	1307	1402	1201	1350	1539	1206	991	1144	1311	1332	1237	1277	1300	1146	1154	1344	1419	1468	1220	1100
TSTD1	2	0	0	0	6	11	0	0	2	1	3	0	1	0	0	1	14	9	0	0	10	4	24	6
USF1	2437	2092	1299	1461	1665	2068	1461	1516	1832	1719	1697	1874	2090	1706	2040	2363	2301	2285	2098	1977	2102	2545	1947	2163
ARHGAP30	3	18	23	41	36	23	28	31	28	17	9	29	44	43	32	12	28	16	20	18	42	18	26	9
NECTIN4	0	12	0	0	8	4	6	6	0	6	14	0	8	0	8	2	18	2	0	12	4	0	6	0
KLHDC9	50	27	16	35	32	36	39	22	40	0	50	0	30	29	38	63	47	48	37	26	37	28	38	13
PFDN2	2992	3577	3298	3258	3687	3670	2688	2939	2611	2381	2260	2325	2895	2930	2529	3894	3390	3471	3257	2934	2871	3137	2812	3041
NIT1	1299	1747	1197	1623	1558	1845	1507	1765	1712	1332	1745	1493	1828	1596	1782	2243	1841	1636	1732	1606	1857	2032	1679	1814
DEDD	1390	1830	1337	1487	1621	1784	1585	1681	1800	1804	1586	1599	2055	1988	2163	2336	2293	1973	2100	2089	2112	2423	2209	2359
UFC1	4065	5745	4446	4986	5594	5675	4563	4666	4657	4620	3667	4201	5103	4985	4705	6730	5213	5636	4525	4859	4666	5571	5079	5246
USP21	2382	2670	2005	2467	2487	2476	1970	2262	2065	2196	2212	2589	2522	2290	2515	2729	2729	2743	2739	2714	2426	2834	2331	2611
PPOX	657	511	531	617	598	750	590	602	516	495	608	538	576	457	565	808	554	560	685	540	618	661	455	611
B4GALT3	3446	4685	3782	4616	4824	5185	4071	4441	4737	3912	4177	4294	4683	4855	5276	5477	5508	5129	4808	4817	5036	5791	4703	5037
ADAMTS4	8	6	18	18	20	17	21	10	14	12	4	26	0	17	34	2	18	29	12	15	6	25	4	34
NDUFS2	6566	6396	2593	2803	2779	3130	2131	2132	2448	2287	2245	2554	2550	2374	2537	3276	3287	3145	2829	2860	2856	3276	2699	3266
FCER1G	8	0	0	10	0	2	0	0	8	0	2	0	5	25	8	20	3	2	3	3	0	3	0	0
APOA2	0	0	0	0	0	0	2	2	0	0	1	0	4	2	0	0	0	2	0	0	0	0	8	0
TOMM40L	1440	1808	1351	1580	1662	1951	1400	1568	1572	1444	1367	1517	1896	1799	1942	1953	2074	2036	1954	2027	1839	2155	2040	2057
MIR5187	0	1	0	0	3	0	2	0	4	0	1	0	0	0	0	0	3	2	5	3	0	3	0	0
NR1I3	66	102	55	62	60	85	87	64	67	62	79	122	115	76	99	117	129	119	94	96	116	92	74	115
PCP4L1	0	0	2	0	0	0	2	2	0	0	3	0	1	0	0	0	0	0	0	2	0	0	0	0
MPZ	18	18	28	10	34	42	31	32	22	12	26	4	34	32	20	34	18	28	10	19	12	15	10	28
SDHC	5807	7099	5291	6205	7000	7322	6054	6773	6465	5946	4991	6347	7230	6659	6618	7653	7664	7524	6853	6844	6667	7870	6905	7330
CFAP126	414	457	370	273	289	338	224	243	293	291	383	388	340	303	204	277	417	459	344	447	330	453	388	432
TRV-CAC1-1	0	2	0	0	8	1	0	2	1	0	0	0	8	10	0	0	7	0	0	0	10	0	0	0
TRE-TTC4-2	1	2	0	2	0	0	0	14	8	0	0	0	1	1	0	0	0	0	0	0	0	0	8	0
TRN-GTT2-2	0	0	0	0	0	0	0	0	0	0	0	0	0	0	0	0	0	0	4	0	0	0	0	0
TRG-TCC4-1	0	0	0	0	0	0	0	0	1	0	0	0	0	0	0	0	0	0	0	0	0	2	0	0
TRD-GTC2-1	0	0	0	0	0	0	0	0	0	0	0	0	0	0	0	0	0	0	0	0	0	0	0	0
TRL-CAG1-1	0	0	0	0	0	0	0	0	0	0	0	0	0	0	0	0	0	0	0	0	0	0	0	0
TRG-GCC1-1	0	0	0	0	0	0	0	0	0	0	0	0	0	0	0	0	0	0	0	0	0	0	0	0
TRE-CTC1-2	0	0	0	0	0	0	1	0	0	0	0	0	0	0	0	0	0	0	0	0	0	0	0	0
TRG-TCC2-2	0	0	0	0	0	0	0	0	0	0	0	0	0	0	0	0	0	0	0	0	0	0	0	0
TRD-GTC2-2	0	0	0	0	0	0	0	0	0	0	0	0	0	0	0	0	0	0	0	0	0	0	0	0
TRL-CAG1-2	0	0	0	0	0	0	0	0	0	0	0	0	0	0	0	0	0	0	0	0	0	0	0	0
TRG-GCC1-2	0	0	0	0	0	0	0	0	0	0	0	0	0	0	0	0	0	0	0	0	0	0	0	0
TRE-CTC1-3	0	0	0	0	0	0	0	0	0	0	0	0	0	0	0	0	0	0	0	0	0	0	0	0
TRG-TCC2-3	0	0	0	0	0	0	0	0	0	0	0	0	0	0	0	0	0	0	0	0	0	0	0	0
TRD-GTC2-3	0	0	0	0	0	0	0	0	0	0	0	0	0	0	0	0	0	0	0	0	0	0	0	0
TRL-CAG1-3	0	0	0	0	0	0	0	0	0	0	0	0	0	0	0	0	0	0	0	0	0	0	0	0
TRG-GCC1-3	0	0	0	0	0	0	0	0	0	0	0	0	0	0	0	0	0	0	0	0	0	0	0	0
TRE-CTC1-4	0	0	0	0	0	0	1	0	0	0	0	0	0	0	0	0	0	0	0	0	0	0	0	0
TRG-TCC2-4	0	0	0	0	0	0	0	0	0	0	0	0	0	0	0	0	0	0	0	0	0	0	0	0
TRD-GTC2-4	0	0	0	0	0	0	0	0	0	0	0	0	0	0	0	0	0	0	0	0	0	0	0	0
TRL-CAG1-4	0	0	0	0	0	0	0	0	0	0	0	0	0	0	0	0	0	0	0	0	0	0	0	0
TRG-GCC1-4	0	0	0	0	0	0	0	0	0	0	0	0	0	0	0	0	0	0	0	0	0	0	0	0
TRE-CTC1-5	0	0	0	0	0	0	0	0	0	0	0	0	0	0	0	0	0	0	0	0	0	0	0	0
TRG-TCC2-5	0	0	0	0	0	0	0	0	0	0	0	0	0	0	0	0	0	0	0	0	0	0	0	0
TRD-GTC2-5	0	0	0	0	0	0	0	0	0	0	0	0	0	0	0	0	0	0	0	0	0	0	0	0
TRL-CAG1-5	0	0	0	0	0	0	0	0	0	0	0	0	0	0	0	0	0	0	0	0	0	0	0	0
TRG-GCC4-1	0	0	0	0	0	0	0	0	0	0	0	0	0	0	0	0	0	0	0	0	0	0	0	0
FCGR2A	4	8	15	13	10	13	7	16	30	3	0	29	10	3	8	8	0	2	4	12	13	22	2	0
TRG-GCC2-1	0	0	0	0	0	0	0	0	0	0	0	0	0	0	0	0	0	0	0	0	0	0	0	0
HSPA6	45	76	68	113	70	70	95	28	69	60	44	60	30	16	71	38	50	35	38	46	24	45	74	24
TRL-CAG1-6	0	0	0	0	0	0	0	0	0	0	0	0	0	0	0	0	0	0	0	0	0	0	0	0
TRG-TCC2-6	0	0	0	0	0	0	0	0	0	0	0	0	0	0	0	0	0	0	0	0	0	0	0	0
[truncated: 26,398 more rows]

## Sheet: RawCounts_ER_opto
Supplementary Table S4: Raw Gene Counts — ER-opto-IRE1α
Raw read counts per gene from time-series bulk RNA-seq. HEK293T ER-opto-IRE1α cells were continuously illuminated (450 nm); samples collected every 15 min over 345 min. Column headers (E0–E345) indicate minutes post-illumination. Aligned to hg38 using RNA-STAR v2.7.11a; counts from featureCounts v2.0.8.
symbol	E0	E15	E30	E45	E60	E75	E90	E105	E120	E135	E150	E165	E180	E195	E210	E225	E240	E255	E270	E285	E300	E315	E330	E345
DDX11L1	0	0	0	1	0	0	0	0	0	0	0	0	0	0	0	0	0	0	0	0	0	1	0	0
WASH7P	407	331	517	311	253	405	353	325	372	315	398	264	352	333	307	340	381	326	292	319	511	414	359	355
MIR6859-1	27	16	13	13	11	16	12	9	33	11	18	20	30	8	14	7	16	11	6	20	25	15	23	12
MIR1302-2	0	0	0	0	0	0	0	0	0	0	0	0	0	0	0	0	0	0	0	0	0	0	0	0
FAM138A	0	0	0	0	0	0	0	0	0	0	0	0	0	0	0	0	0	0	0	0	0	0	0	0
OR4F5	0	0	0	0	0	0	0	0	0	0	0	0	0	0	0	0	0	0	0	0	0	0	0	0
LOC729737	14	16	18	11	10	11	4	5	10	5	1	12	12	4	17	11	8	12	18	0	13	8	8	7
DDX11L17	0	1	6	5	1	8	1	0	2	4	0	6	5	0	15	7	2	5	2	0	3	8	12	7
LOC102723897	356	393	426	273	444	470	352	365	297	379	502	227	434	294	351	293	443	328	324	356	469	513	497	347
MIR6859-2	3	1	1	1	1	2	0	0	0	0	0	0	1	2	0	0	0	0	0	6	0	0	0	1
OR4F29	0	0	0	0	0	0	0	1	0	0	0	0	0	0	0	0	0	0	0	0	0	0	0	0
LOC100132287	18	15	16	17	16	24	12	6	10	11	25	3	8	16	14	15	16	15	6	9	23	31	18	11
LOC105378947	0	0	0	0	0	0	0	0	0	0	0	0	0	2	0	6	0	4	3	0	7	0	0	0
LOC101928626	0	0	0	0	0	0	0	0	0	0	0	0	0	0	0	0	0	0	0	0	0	0	0	0
	24	56	42	25	96	60	49	53	22	31	30	18	56	32	28	54	44	21	18	29	53	31	63	43
OR4F16	0	0	0	0	0	0	0	2	0	0	0	0	0	0	0	0	0	0	0	0	0	0	1	0
	137	119	164	108	184	82	108	110	96	129	137	69	135	107	110	112	113	82	97	84	135	179	216	108
LOC100288069	36	89	78	66	64	76	43	50	33	74	67	28	22	60	81	42	66	77	30	54	74	82	77	42
FAM87B	0	1	3	2	0	2	0	2	2	2	1	0	0	1	8	4	0	0	0	0	0	1	2	4
LINC00115	8	8	38	1	22	28	20	16	28	26	26	10	18	18	12	21	11	26	37	2	43	30	33	12
LINC01128	923	694	1109	590	690	832	756	708	567	696	646	554	808	634	688	663	712	579	592	833	1089	1010	1192	901
FAM41C	12	0	0	2	0	0	0	0	0	0	0	0	4	0	0	0	0	0	0	5	6	0	4	3
LINC02593	446	556	621	381	528	602	552	537	423	469	645	325	527	375	464	309	424	396	433	417	677	586	679	410
SAMD11	2583	2581	2886	1763	2627	2854	2652	2185	2354	2401	2575	1806	2600	2298	2411	1797	2466	2229	2279	1795	2577	2912	3470	2700
NOC2L	14053	12504	15745	9365	12712	13433	13381	11289	11070	10913	12754	9259	13616	10728	13235	9960	12248	11597	11581	12231	15546	15038	17763	13413
KLHL17	1183	1330	1347	949	1195	1354	1163	1216	1110	1195	1305	833	1178	981	1376	976	1258	1000	1119	928	1741	1584	1752	1159
PLEKHN1	8	2	12	14	9	6	14	2	16	0	12	2	9	10	2	16	4	2	10	0	10	3	10	2
PERM1	17	4	6	0	0	3	5	4	8	2	12	6	24	2	0	7	2	8	0	8	20	2	6	6
HES4	2004	2016	2453	1434	1911	2366	2032	1865	1770	1954	2188	1385	2237	1753	1973	1401	1824	1752	1861	1279	2255	2294	2486	1888
ISG15	95	77	114	50	52	75	88	102	81	50	69	56	145	55	96	44	82	60	89	80	122	141	128	136
AGRN	2949	3179	3370	2181	2828	3329	2821	2465	2195	2720	2724	1908	3027	2160	2877	1659	2575	2599	2405	1968	3040	2989	3383	2536
	1	5	17	4	6	11	4	7	3	10	8	12	8	0	13	18	5	8	2	0	1	5	1	5
LOC105378948	10	19	4	12	17	8	13	1	16	22	7	5	9	1	8	11	22	15	9	20	5	5	9	18
RNF223	0	0	0	0	0	0	0	0	0	0	1	0	0	0	0	1	0	0	0	0	0	0	0	0
C1orf159	901	732	1113	629	931	893	827	885	851	745	901	667	1062	676	950	573	741	889	870	767	1023	1014	1325	886
LINC01342	0	0	0	0	0	0	0	0	0	0	0	0	0	0	0	0	0	0	0	0	0	0	0	0
MIR200B	0	0	0	0	0	0	0	0	0	0	0	0	0	0	1	0	0	0	0	0	0	0	0	0
MIR200A	0	0	0	0	0	0	0	0	0	0	0	0	0	0	0	0	0	0	0	0	0	0	0	0
MIR429	0	0	0	0	0	0	0	0	0	0	0	0	0	0	0	0	0	0	0	0	0	0	0	0
TTLL10	0	0	0	0	0	0	0	0	0	0	0	0	0	0	0	0	0	0	0	3	0	0	0	0
TNFRSF18	0	0	0	4	0	0	0	0	0	0	0	0	0	0	0	0	0	0	0	0	1	0	0	0
TNFRSF4	2	0	0	0	0	0	0	0	0	0	0	0	0	0	1	0	0	1	2	0	0	0	0	1
SDF4	5066	4598	6040	3369	4648	5179	5309	4149	4227	4398	4789	3657	5134	4232	5413	3738	4722	4708	4745	3756	5717	5680	6796	5752
B3GALT6	2245	1954	2479	1506	2175	2230	2426	1833	2119	1756	2343	1498	2393	2039	2219	1610	2388	2189	2186	2199	2642	2536	3188	2211
C1QTNF12	19	14	34	19	32	38	20	12	32	18	30	10	6	25	20	11	55	11	33	12	33	18	28	21
UBE2J2	3556	2770	3629	2196	2951	3233	3092	2542	2691	2544	2892	2215	3304	2539	3172	2265	2811	2763	2694	2336	3589	3427	3984	3211
SCNN1D	187	198	244	171	197	185	197	208	281	216	249	139	186	217	171	176	274	220	176	182	326	260	314	187
ACAP3	1411	1640	1754	1034	1296	1742	1412	1447	1256	1362	1736	1026	1571	1265	1487	1073	1452	1388	1453	1029	2199	1875	2246	1514
MIR6726	0	0	0	0	0	0	0	0	0	0	0	0	0	0	0	0	0	0	0	0	0	0	0	0
PUSL1	1620	1300	1573	1056	1406	1546	1659	1339	1388	1455	1453	1102	1724	1223	1468	1156	1405	1395	1474	1122	1801	1667	2109	1794
INTS11	2912	2766	3620	2030	2638	3196	2806	2439	2487	2554	2816	1986	3072	2465	2955	1964	2512	2737	2520	2620	3480	3595	4140	3378
MIR6727	0	0	0	0	0	0	0	0	0	0	0	0	1	0	0	0	0	0	2	0	0	0	0	0
CPTP	799	884	1024	623	703	764	755	655	621	695	726	540	890	697	775	705	801	728	788	729	938	931	972	954
TAS1R3	58	56	42	22	12	49	68	45	36	34	62	42	84	20	85	52	82	63	27	30	86	36	98	109
DVL1	5181	4550	5846	3335	4490	5250	4871	4243	3943	3620	4755	3448	5075	4248	4850	3629	4517	4554	4439	4334	5339	4925	6203	5033
MIR6808	0	0	0	0	0	0	0	0	0	0	0	0	0	0	0	0	0	0	0	0	0	0	0	0
MXRA8	244	227	281	237	281	267	312	303	239	211	280	203	284	250	201	239	311	329	306	193	335	416	460	318
AURKAIP1	5108	4188	5131	3161	4371	4488	4491	3879	4087	3683	4468	3054	4960	3941	4411	3421	4290	3652	4044	3551	4590	4718	5943	4599
CCNL2	2964	3076	3538	2173	2715	3540	2812	2518	2650	2785	3184	2004	2944	2573	2782	1897	2914	2464	2363	2579	4875	4436	4996	3023
MRPL20-AS1	933	949	1127	659	854	890	923	749	791	693	736	708	974	855	1020	740	914	761	662	880	1100	1116	1392	1025
MRPL20	3295	2842	3898	2234	2794	2992	3119	2636	2510	2444	2634	2044	3489	2569	3107	2255	2995	2576	2525	2511	3747	3792	4337	3236
ANKRD65	0	3	0	0	0	2	0	0	0	1	0	0	0	2	0	0	6	0	10	0	0	0	0	0
TMEM88B	0	0	2	2	0	0	0	0	0	0	0	0	0	0	4	0	0	0	0	0	0	0	0	0
LINC01770	29	7	12	12	26	0	15	24	0	18	8	2	2	26	6	2	22	9	8	0	36	16	16	16
VWA1	599	600	855	458	466	675	669	508	532	513	604	360	786	610	827	475	534	618	617	490	640	642	777	700
ATAD3C	16	20	19	4	12	13	9	15	3	6	14	19	11	11	14	3	24	17	14	2	4	9	22	6
ATAD3B	2960	2598	3208	2044	2665	2920	2971	2647	2562	2588	2639	2057	2906	2487	3065	2167	3011	2348	2580	2440	3659	3687	4099	3119
ATAD3A	3876	3446	4737	2437	3272	3819	3782	3121	3269	3122	3588	2552	3767	3225	3915	2841	3433	3415	3329	3267	4071	4034	4572	3516
TMEM240	8	4	4	11	12	16	10	7	35	8	11	13	9	11	8	10	34	15	16	29	36	10	25	12
SSU72	5776	4918	6533	3825	5008	5392	5111	4064	4141	4147	4764	3896	4916	4187	4905	3776	4938	4362	4389	4390	6161	6222	7249	5302
FNDC10	608	674	658	464	663	554	798	551	503	463	704	398	580	430	656	383	511	467	626	536	600	494	613	576
MIB2	1484	1384	1637	989	1412	1723	1349	1335	1162	1530	1388	1072	1512	1407	1483	1025	1379	1346	1454	821	1669	1727	1847	1414
MMP23B	13	7	15	4	7	10	7	19	5	15	18	13	21	18	10	3	24	19	9	0	20	20	19	16
CDK11B	2634	2331	2741	1559	2185	2623	2480	2115	2076	2028	2289	1570	2726	2035	2365	1815	2352	2173	2115	1981	2820	2886	3517	2663
SLC35E2B	3460	3192	3420	2126	2691	3091	2980	2393	2455	2474	3024	1834	2976	2330	3046	2078	2645	2384	2329	2771	3745	3783	4149	3234
MMP23A	0	8	0	0	0	1	0	2	1	0	0	2	0	6	9	1	1	2	5	0	0	0	0	0
CDK11A	506	600	634	406	606	536	626	425	500	498	448	413	448	404	535	507	466	441	499	556	588	599	673	498
SLC35E2A	529	513	666	383	484	571	463	453	392	445	518	292	481	363	438	331	471	450	367	460	762	808	910	607
NADK	3624	3407	4126	2420	3080	3603	3618	2924	3024	2800	3338	2528	4038	2982	3615	2720	2941	3048	3024	2915	4122	4008	5297	3888
GNB1	17103	14622	19275	11274	15119	15657	15846	13159	13235	13471	14491	10753	16213	12613	15468	11198	14423	13119	12685	14935	19441	19434	22665	17688
GNB1-DT	25	28	40	6	2	18	27	14	26	24	51	18	19	20	23	16	36	21	17	28	12	35	20	15
CALML6	0	7	7	5	6	4	7	14	13	10	10	0	0	30	1	0	14	4	2	1	19	24	22	4
TMEM52	122	113	156	65	171	122	92	127	127	88	115	108	90	140	120	108	126	90	128	75	149	154	168	140
CFAP74	12	6	10	8	2	19	8	0	6	11	2	1	8	11	3	6	21	11	9	0	25	5	11	4
GABRD	139	158	48	64	77	51	110	120	98	61	53	54	149	73	88	53	85	99	74	69	96	112	93	105
PRKCZ	985	955	1164	734	917	1067	927	797	820	1055	978	771	1115	787	1004	664	911	759	907	1029	1181	1213	1445	956
PRKCZ-AS1	35	29	72	45	64	87	25	49	45	54	84	46	64	40	84	56	71	26	48	73	71	107	45	40
FAAP20	997	885	1216	714	951	1075	1039	900	933	962	990	724	1088	872	1017	764	1077	901	893	491	1203	1034	1423	1059
	6	3	0	4	0	14	6	0	0	2	12	0	2	14	4	2	2	2	2	0	8	9	9	4
SKI	6764	6206	8120	4631	6801	6968	6897	5561	5381	5680	6401	4687	7028	5616	7033	4726	5915	5840	5997	6094	7630	7532	9180	7439
	18	14	10	8	4	4	6	14	0	4	0	0	0	8	4	0	10	10	2	24	10	18	32	10
MORN1	316	297	500	195	331	285	330	291	220	320	338	270	322	303	351	290	290	260	335	307	442	372	535	408
LOC100129534	30	64	62	26	60	55	48	66	72	78	26	21	51	45	62	33	66	54	58	32	47	86	65	50
RER1	3883	3585	5044	2778	4097	3760	3741	3360	3322	3279	4096	2641	3897	3092	3738	2878	3656	3242	3121	3929	5206	5040	5824	4434
PEX10	769	664	947	544	634	745	825	609	697	687	800	585	894	713	828	575	686	626	652	676	665	871	981	694
PLCH2	0	0	8	0	0	1	0	0	0	0	0	0	0	0	0	0	0	0	0	0	1	0	1	0
PANK4	0	1	2	0	0	0	0	0	0	0	1	0	0	0	0	0	0	0	0	0	0	0	0	0
HES5	0	0	0	0	0	0	0	0	0	0	0	0	0	0	0	0	0	0	0	0	0	0	0	0
TNFRSF14-AS1	0	0	0	0	0	0	0	0	0	0	0	0	0	0	0	0	0	0	0	0	0	0	0	0
TNFRSF14	0	0	0	0	0	0	0	0	0	0	0	0	0	0	0	0	0	0	0	0	0	0	0	0
LOC100996583	0	0	0	0	0	0	0	0	0	0	0	0	0	0	0	0	0	0	0	0	0	0	0	0
PRXL2B	0	0	0	0	0	0	0	0	4	0	0	0	1	0	0	1	0	0	0	0	0	0	0	0
MMEL1	0	0	0	0	0	0	0	0	0	0	0	0	0	0	0	0	0	0	0	0	0	0	0	0
TTC34	0	2	0	0	0	0	0	0	2	0	0	0	0	0	0	0	0	0	0	0	0	0	0	0
ACTRT2	0	0	0	0	0	0	0	0	0	2	0	0	0	0	0	0	0	0	0	0	0	0	0	0
PRDM16-DT	52	78	110	67	64	77	83	86	28	42	66	32	48	63	10	21	75	61	55	81	89	87	48	37
PRDM16	669	580	709	416	565	608	566	513	513	546	525	421	720	555	642	341	520	536	565	433	656	709	823	608
MIR4251	0	0	0	0	0	0	0	0	0	0	0	0	0	0	0	0	0	0	0	0	0	0	0	2
ARHGEF16	175	210	328	177	207	256	213	148	219	190	119	135	222	220	184	168	249	148	189	253	253	162	392	207
MEGF6	55	100	78	96	127	89	89	61	84	97	92	71	58	83	58	64	48	60	49	77	138	148	105	74
MIR551A	0	0	0	0	0	0	0	0	0	0	0	0	0	0	0	0	0	0	0	0	0	0	0	0
TPRG1L	1177	871	1220	745	889	1110	1079	898	955	1033	1127	788	1393	928	1149	839	1064	980	922	911	1519	1445	1649	1349
WRAP73	1553	1568	1738	1041	1674	1684	1566	1271	1363	1340	1460	1151	1621	1448	1638	1264	1576	1368	1361	1383	2034	1928	2225	1854
TP73	605	541	691	412	586	504	545	500	468	359	479	329	609	535	525	357	507	456	480	390	596	562	701	508
GFOD3P	2413	2220	2831	1631	1910	2379	2076	1954	1825	1970	2097	1679	2401	1927	2521	1738	2067	2012	1917	2027	3114	2731	3129	2328
CCDC27	0	8	0	0	13	3	12	8	6	8	22	0	23	1	0	7	0	4	0	4	4	12	4	0
SMIM1	37	30	66	25	18	66	43	35	35	26	16	20	37	5	31	26	15	20	28	12	17	22	35	32
LRRC47	4656	4237	5174	3013	4228	4489	4567	3883	3500	3827	4444	2886	4783	3600	4527	3351	4395	3743	3589	4427	5208	5025	6286	4611
CEP104	3028	2635	3411	1897	2858	2715	2776	2432	2212	2319	2703	1980	2886	2470	2805	2120	2675	2490	2396	2613	3630	3517	4436	3208
DFFB	1122	958	1355	806	1064	1109	1007	804	827	1006	1020	715	1176	1050	1094	825	1061	839	873	856	1538	1531	1610	1242
C1orf174	1534	1401	1760	1021	1297	1377	1476	1172	1078	1240	1579	1242	1525	1270	1457	1042	1365	1172	1137	1329	2005	1901	2416	1485
LINC01134	12	23	21	13	33	31	21	12	18	28	28	2	4	24	15	13	17	19	6	0	18	16	40	23
LINC01346	0	0	0	0	0	0	0	0	0	0	0	0	0	0	0	0	0	0	0	0	0	0	0	0
LINC01777	0	0	0	0	0	0	0	0	0	0	0	0	0	0	0	0	0	0	0	0	0	0	0	0
AJAP1	0	0	0	0	0	0	0	0	0	0	0	0	0	0	0	0	0	0	0	0	0	0	0	0
	0	0	0	0	0	0	0	0	0	0	0	0	0	0	0	0	0	0	0	0	0	0	0	0
MIR4689	0	0	0	0	0	0	0	0	0	0	0	0	0	0	0	0	0	0	0	0	1	0	0	2
NPHP4	813	663	934	518	662	687	761	654	468	742	870	490	677	707	746	577	668	686	641	692	1036	1008	961	783
KCNAB2	275	311	365	248	360	354	303	257	288	223	309	211	373	253	300	187	238	253	228	189	319	285	281	284
CHD5	42	30	60	12	29	39	43	34	28	22	74	31	44	15	52	19	40	28	24	18	52	50	57	27
RPL22	9645	7982	11565	6551	8941	9102	9088	7025	7363	7945	8486	6467	9774	7401	8933	6707	9356	7507	7046	8982	11607	11402	13060	10509
RNF207-AS1	0	0	3	0	12	4	0	2	0	0	8	4	0	0	1	0	0	0	0	0	0	5	8	8
RNF207	192	183	201	109	77	202	140	140	141	160	178	100	201	104	164	80	142	118	88	62	255	234	263	203
ICMT	12326	9752	12284	6593	9478	9704	9047	7566	7341	8091	9025	7011	10101	7627	9276	6943	8657	7968	7721	8516	12101	12571	14393	11659
ICMT-DT	34	80	82	30	75	77	38	32	56	37	24	27	23	30	56	31	54	24	48	30	63	43	51	64
HES3	0	0	0	0	0	0	0	0	0	0	0	0	0	0	0	0	0	0	0	0	0	0	0	0
GPR153	403	390	449	266	382	446	396	322	361	285	397	253	372	369	392	274	439	350	316	308	392	368	481	435
ACOT7	3198	2996	3599	2187	2866	3247	3184	2785	2697	2731	3039	2223	3243	2816	3050	2319	2875	2814	2965	2911	3550	3618	4389	3240
HES2	17	6	10	4	8	7	8	12	14	2	4	0	16	6	2	14	20	4	12	0	7	8	19	5
ESPN	0	10	6	2	13	16	10	0	6	0	0	1	8	0	10	5	0	0	6	0	10	12	4	2
MIR4252	0	0	0	0	0	0	0	0	0	0	0	0	0	0	0	0	0	0	0	0	0	0	0	0
TNFRSF25	60	58	88	45	77	71	59	61	48	40	66	26	73	71	28	32	68	79	36	79	104	80	87	94
PLEKHG5	283	256	398	205	234	274	351	263	210	231	264	180	335	254	267	174	270	251	263	229	304	311	447	286
NOL9	3859	3620	4980	2692	4032	3599	4065	3065	3251	3562	3608	2522	4103	2989	3779	2978	3452	2827	3162	3087	5086	4953	5659	4250
TAS1R1	2	4	2	0	8	2	2	13	0	10	0	0	6	0	2	0	0	4	6	0	0	2	2	20
ZBTB48	730	872	1017	620	897	913	917	852	746	795	850	638	861	847	818	727	945	725	698	826	1210	1067	1355	864
KLHL21	3318	2916	3803	2281	2841	3466	3006	2794	3046	2898	3078	2306	3516	2860	3424	2431	2701	2768	2978	2616	3662	3372	4404	3433
PHF13	2096	1725	2335	1351	1913	1945	1993	1680	1665	1624	1951	1408	2128	1625	1957	1233	1892	1673	1582	1852	2472	2541	2865	2331
THAP3	761	614	775	499	619	645	717	561	563	593	651	573	644	521	677	528	693	669	636	570	847	851	896	757
DNAJC11	3433	3136	3969	2332	3323	3263	3328	2681	2653	2871	2742	1998	3393	2648	3388	2388	3121	2844	2641	2969	4385	3878	5053	3605
LINC01672	0	0	0	0	0	0	0	0	0	0	0	0	0	0	0	0	0	0	0	0	0	0	0	0
CAMTA1	2140	1802	2409	1296	1882	1956	1847	1713	1485	1370	1750	1401	2110	1491	1618	1416	1727	1586	1595	2133	2511	2480	2601	2301
VAMP3	4379	3429	4883	2585	3627	3354	3686	3138	3072	3208	3425	2738	3787	2943	3564	3010	3704	3052	2702	4244	5173	5088	5677	4204
PER3	352	342	448	300	332	395	432	346	297	256	359	316	300	362	393	271	308	370	290	474	432	512	525	459
UTS2	0	0	0	0	4	0	0	0	0	0	0	0	0	2	0	0	0	0	0	1	0	0	0	0
TNFRSF9	0	2	0	0	0	1	2	0	0	0	4	4	6	2	8	2	0	0	0	0	6	2	6	0
PARK7	10764	9333	12541	7190	9896	9472	9986	7986	8164	7953	9501	6829	10231	7842	9693	7434	9122	8278	7863	9788	13013	12804	15226	11709
ERRFI1	1590	1376	1858	1048	1439	1438	1589	1357	1092	1312	1349	1174	1587	1259	1603	1085	1334	1221	1131	1400	2230	2010	2483	1746
LINC01714	0	0	0	0	0	0	0	0	0	0	0	0	0	0	0	0	0	0	0	0	0	0	0	0
SLC45A1	2	0	4	8	0	8	0	6	4	14	4	2	12	18	20	0	0	4	0	0	6	2	24	0
RERE	3498	3401	4434	2572	3511	3923	3526	3135	2821	3019	3244	2375	3771	2892	3565	2385	2733	3310	3287	3213	4502	4160	5384	3915
RERE-AS1	0	0	6	0	0	0	2	0	0	0	0	4	0	0	0	0	0	0	0	0	4	4	0	0
ENO1	114618	100709	130611	75064	103224	105591	108591	90547	92794	88792	105206	76191	115935	88996	106840	79386	101582	91304	91377	99635	134739	129904	154536	122584
MIR6728	0	0	0	0	0	0	0	0	2	0	0	0	0	0	0	0	0	0	0	0	0	0	0	0
ENO1-AS1	0	1	0	0	0	6	4	2	6	0	0	0	2	0	6	1	0	0	0	0	0	3	4	0
CA6	1	0	0	1	0	0	0	0	0	0	0	0	0	0	0	0	0	0	0	0	0	0	0	0
SLC2A7	3	0	0	0	1	1	2	0	2	0	0	0	20	0	8	0	0	2	6	0	0	6	2	2
SLC2A5	10	4	12	1	0	1	0	0	0	1	0	6	8	0	0	0	0	3	0	0	2	0	0	0
GPR157	419	361	362	348	370	425	424	303	250	322	485	237	331	323	345	231	406	391	368	241	298	372	594	400
MIR34A	0	0	0	0	0	0	0	0	0	0	0	0	0	0	0	0	0	0	0	0	0	0	0	0
H6PD	1366	1169	1337	733	1121	1093	1136	997	821	907	1054	665	1147	867	1064	733	950	892	906	1003	1132	1189	1555	1196
SPSB1	343	285	287	224	330	336	317	246	230	296	316	230	303	321	349	243	221	250	283	221	385	444	387	340
LINC02606	24	37	42	28	54	52	48	25	28	12	6	12	32	13	28	32	72	55	20	0	10	36	46	40
SLC25A33	654	644	1035	581	668	626	746	631	529	618	787	482	663	616	640	525	693	631	676	592	872	865	1130	924
TMEM201	3321	2748	3850	2108	3007	3109	2981	2559	2351	2657	3153	1982	3006	2627	3237	2165	2749	2696	2572	2395	3537	3464	3925	2975
PIK3CD	385	242	247	171	241	256	251	231	245	168	349	161	405	238	273	233	194	228	232	168	347	307	347	281
PIK3CD-AS1	0	0	0	0	0	0	0	0	0	0	0	0	0	0	0	0	0	0	0	0	0	0	0	0
PIK3CD-AS2	242	147	209	86	188	164	161	171	161	127	144	124	168	139	198	104	156	93	146	140	297	225	206	186
CLSTN1	8412	7361	9328	5521	7342	8154	7743	6558	6513	6200	7614	5777	8310	6318	7809	5568	6681	7173	6457	7616	9606	9385	11331	8707
CTNNBIP1	922	686	856	510	518	768	845	597	507	536	695	494	760	617	773	619	759	613	611	600	1042	806	1154	875
LZIC	1511	1317	1986	1096	1540	1334	1596	1281	1000	1289	1420	1087	1670	1239	1560	1148	1380	1222	1089	1388	2057	2077	2592	2039
NMNAT1	517	488	520	408	469	560	538	438	407	514	610	319	563	420	486	427	504	419	393	446	758	651	796	588
MIR5697	0	0	0	0	2	0	0	0	0	2	0	0	0	0	0	0	0	0	2	0	6	1	2	0
	8	0	0	0	0	0	2	0	0	0	0	0	1	0	0	0	0	1	0	0	3	0	0	4
RBP7	27	42	30	16	10	40	50	12	34	22	28	16	24	33	34	16	32	24	12	40	38	104	74	56
UBE4B	5272	5065	6750	3429	4778	4986	5284	4402	3952	4449	4995	3940	5590	4442	5316	4015	4301	4641	4342	5331	7167	6771	8317	6381
KIF1B	7148	6156	7950	4805	6984	6582	6794	5563	4797	5684	6213	4838	6668	5483	6442	4894	5256	5370	5058	7296	8806	9015	10585	7768
	0	5	0	0	0	2	0	0	0	0	0	0	0	0	0	0	0	0	0	0	0	0	0	0
PGD	9897	8228	11390	6108	8470	8942	8475	7191	7249	7671	8696	6190	9550	7447	8933	6896	8171	7242	7090	8644	11840	11151	14056	10450
CENPS-CORT	0	0	0	0	0	0	0	0	0	0	0	0	0	0	0	0	0	0	0	0	0	0	0	0
CENPS	120	141	118	70	99	103	90	94	95	102	145	87	68	89	132	57	109	69	98	109	109	119	125	104
CORT	6	18	16	4	20	13	18	8	3	12	2	14	6	0	11	8	12	3	1	16	15	10	13	16
DFFA	5706	5291	6965	4034	5274	5399	5391	4520	4442	4678	5354	3790	5616	4538	5718	4191	5133	4672	4562	5433	6517	6318	7278	5608
PEX14	1528	1341	1624	1131	1232	1517	1515	1139	1107	1132	1335	951	1522	1110	1415	1106	1448	1262	1334	1372	1545	1415	1894	1356
CASZ1	582	501	633	342	527	504	613	554	377	487	489	375	380	353	450	314	483	499	476	521	552	643	779	626
C1orf127	8	2	1	10	17	8	11	0	4	1	0	0	14	8	0	2	0	4	6	0	6	6	2	2
TARDBP	17853	15484	20610	12005	17204	15973	16369	13687	13076	14986	16600	12094	16938	12819	16630	12110	15422	13869	12883	16791	23754	22544	26648	20686
MASP2	47	65	152	58	80	116	89	57	67	84	115	35	50	58	85	67	36	75	60	75	161	154	158	83
SRM	11548	10196	12556	7519	9839	10769	10799	8571	8882	8371	10280	7240	10702	8944	10610	7746	10284	9403	8976	8654	11159	10937	13394	10271
EXOSC10	6858	5846	8080	4929	6218	6303	6623	5241	4972	5411	6294	4710	6490	5212	6323	4582	5414	4950	4916	5496	8814	8092	9758	7522
MTOR	9452	8562	11072	6335	8542	9232	8936	7701	7103	8154	8503	6370	9409	7339	8838	6804	7243	7596	7595	9511	11606	11756	13391	10221
MTOR-AS1	0	3	0	0	1	0	0	2	0	2	0	0	0	1	0	0	0	2	0	28	0	1	0	0
ANGPTL7	0	0	0	0	0	4	0	0	0	6	2	0	0	0	0	1	3	2	2	0	8	0	6	2
UBIAD1	2344	1966	2553	1540	2064	2144	2406	1918	1927	1886	2268	1641	2307	1993	2360	1768	1915	1732	1843	2526	2884	2580	3423	2494
DISP3	4	12	12	23	14	21	25	16	4	18	4	14	19	20	24	13	9	16	3	18	12	20	34	25
LINC01647	2	4	0	16	0	0	0	0	0	0	0	0	6	0	0	6	0	0	4	0	0	2	0	0
FBXO2	44	55	38	41	12	52	35	48	59	35	18	45	74	30	41	44	4	66	50	70	34	51	94	78
FBXO44	926	852	1281	645	857	951	962	766	910	802	762	564	880	857	858	671	1037	748	767	593	1235	1177	1383	974
FBXO6	62	58	60	27	64	73	61	40	78	73	81	41	31	46	82	24	82	70	35	26	76	88	117	65
MAD2L2	2936	2549	3172	1908	2371	2503	2892	2147	2187	2236	2406	1872	2628	2261	2762	1979	2563	2417	2396	1828	2820	2718	3541	2713
DRAXIN	0	0	2	6	0	7	10	1	2	5	10	0	12	0	0	0	12	10	4	0	10	9	16	10
AGTRAP	1739	1568	1867	1168	1512	1533	1917	1330	1523	1328	1377	1210	1547	1332	1489	1170	1463	1317	1339	1681	1772	1494	1986	1669
C1orf167	11	7	14	12	6	20	3	19	8	7	14	0	0	0	15	15	16	4	19	0	7	2	5	11
C1orf167-AS1	2	0	0	0	0	0	0	0	0	0	0	0	0	6	4	2	14	0	0	0	0	2	2	0
MTHFR	1231	1086	1238	756	1105	1059	1182	816	867	1084	1079	722	988	912	1077	720	955	972	916	768	1385	1343	1637	1185
CLCN6	542	592	718	404	522	549	467	484	447	479	410	318	472	396	540	409	376	480	383	557	679	764	816	577
NPPA-AS1	20	12	0	7	12	23	7	15	4	5	0	8	6	21	13	7	22	8	18	16	25	7	20	5
NPPA	10	18	13	13	6	13	12	18	0	17	4	16	1	23	11	9	14	13	6	9	6	11	16	15
NPPB	2	0	0	0	0	0	0	0	0	0	0	0	0	0	0	0	0	0	0	0	0	0	0	0
RNU5E-1	0	0	0	0	0	0	2	0	0	4	0	0	0	0	2	0	0	2	0	0	0	0	0	0
KIAA2013	3439	3077	3735	2093	2807	3185	3068	2398	2278	2366	2551	2183	3087	2436	2848	2036	2753	2749	2744	2866	3155	3159	3813	3080
PLOD1	5411	4649	6368	3492	4678	4998	5218	4223	4461	4197	5171	3520	5524	4486	5237	3878	4903	4807	4839	4756	5937	5964	7052	5664
MFN2	10302	8978	11836	6537	9240	9415	9498	8206	7770	8580	8543	6324	9773	7617	9623	6977	8374	7883	7996	9580	12141	11716	13965	11130
MIIP	1253	1026	1401	800	1023	1309	1268	1004	1047	983	1116	653	1414	1031	1085	870	1280	1128	1129	710	1519	1211	1488	1271
MIR6729	0	0	0	0	0	0	0	0	0	0	0	0	0	0	0	0	0	0	0	0	0	0	0	0
TNFRSF8	14	8	4	8	0	28	7	12	4	12	8	8	30	4	1	12	2	16	5	11	8	4	18	4
MIR7846	0	0	0	0	0	0	0	0	0	0	0	0	0	0	0	0	0	0	0	0	0	0	0	0
TNFRSF1B	1	22	12	15	20	2	12	6	16	16	0	18	26	10	4	8	6	10	8	22	12	14	14	10
MIR4632	0	0	0	0	1	0	0	0	0	0	0	0	0	2	0	0	0	0	0	0	0	0	5	0
VPS13D	2852	2511	3536	1793	2498	2922	2707	2325	2148	2449	2469	1814	2712	2249	3054	2040	2071	2236	2339	3525	3265	3379	3811	2913
SNORA59A	5	11	7	1	0	8	7	7	9	10	0	9	3	9	7	2	8	4	4	10	13	6	6	9
DHRS3	344	285	354	214	352	231	316	182	272	235	283	187	341	270	224	239	272	250	225	253	366	346	391	299
MIR6730	0	0	0	0	0	1	0	0	0	0	0	0	0	0	0	0	0	0	1	0	0	0	3	0
AADACL4	0	2	0	0	0	0	0	0	0	0	0	0	0	0	0	0	0	0	0	0	0	8	0	0
AADACL3	0	0	0	0	0	0	0	0	0	0	0	0	0	0	0	0	0	0	0	0	0	0	0	0
CFAP107	0	0	0	0	0	0	0	0	0	0	0	0	0	0	0	0	0	0	0	0	0	0	0	0
PRAMEF12	0	0	0	0	0	0	0	0	0	0	0	0	0	0	0	0	0	0	0	0	0	0	0	0
PRAMEF1	0	0	0	0	0	0	0	0	0	0	0	0	0	0	0	0	0	0	0	0	0	0	0	0
PRAMEF11	0	0	0	0	0	0	0	0	0	0	0	0	0	0	0	0	0	0	0	0	0	0	0	0
HNRNPCL1	55	67	83	34	112	96	66	114	66	38	50	80	50	61	117	54	96	88	61	59	53	59	105	78
PRAMEF2	0	0	0	0	0	0	0	0	0	0	0	0	0	0	0	0	0	0	0	0	0	0	0	0
PRAMEF4	0	0	0	0	0	0	0	0	0	0	0	0	0	0	0	0	0	0	0	0	0	0	0	0
PRAMEF10	0	0	0	0	0	0	0	0	0	0	0	0	0	0	0	0	0	0	0	0	0	0	0	0
PRAMEF7	0	0	0	0	0	0	0	0	0	0	0	0	0	0	0	0	0	0	0	0	0	0	0	0
PRAMEF6	0	0	0	0	0	0	0	0	0	0	0	0	0	0	0	0	0	0	0	0	0	0	0	0
PRAMEF22	0	0	0	0	0	0	0	0	0	0	0	0	0	0	0	0	0	0	0	0	0	0	0	0
PRAMEF28P	0	0	0	0	0	0	0	0	0	0	0	0	0	0	0	0	0	0	0	0	0	0	0	0
PRAMEF27	0	0	0	0	0	0	0	0	0	0	0	0	0	0	0	0	0	0	0	0	0	0	0	0
HNRNPCL3	1	5	6	2	7	4	1	4	2	0	2	1	0	1	2	3	1	0	1	5	3	0	0	1
PRAMEF25	0	0	0	0	0	0	0	0	0	0	0	0	0	0	0	0	0	0	0	0	0	0	0	0
PRAMEF34P	0	0	0	0	0	0	0	0	0	0	0	0	0	0	0	0	0	0	0	0	0	0	0	0
HNRNPCL2	8	26	12	10	43	22	18	28	11	10	8	13	14	17	12	8	19	18	19	7	14	5	44	18
PRAMEF36P	0	0	0	0	0	0	0	0	0	0	0	0	0	0	0	0	0	0	0	0	0	0	0	0
PRAMEF26	0	0	0	0	0	0	0	0	0	0	0	0	0	0	0	0	0	0	0	0	0	0	0	0
HNRNPCL4	4	10	13	5	4	3	3	4	4	3	1	2	2	4	2	3	4	7	7	7	2	4	8	1
PRAMEF9	0	0	0	0	0	0	0	0	0	0	0	0	0	0	0	0	0	0	0	0	0	0	0	0
PRAMEF13	0	0	0	0	0	0	0	0	0	0	0	0	0	0	0	0	0	0	0	0	0	0	0	0
PRAMEF18	0	0	0	0	0	0	0	0	0	0	0	0	0	0	0	0	0	0	0	0	0	0	0	0
PRAMEF5	0	0	0	0	0	0	0	0	0	0	0	0	0	0	0	0	0	0	0	0	0	0	0	0
PRAMEF8	0	0	0	0	0	0	0	0	0	0	0	0	0	0	0	0	0	0	0	0	0	0	0	0
PRAMEF33	0	0	0	0	0	0	0	0	0	0	0	0	0	0	0	0	0	0	0	0	0	0	0	0
PRAMEF15	0	0	0	0	0	0	0	0	0	0	0	0	0	0	0	0	0	0	0	0	0	0	0	0
PRAMEF14	0	0	0	0	0	0	0	0	0	0	0	0	0	0	0	0	0	0	0	0	0	0	0	0
PRAMEF19	0	0	0	0	0	0	0	0	0	0	0	0	0	0	0	0	0	0	0	0	0	0	0	0
PRAMEF17	0	0	0	0	0	0	0	0	0	0	0	0	0	0	0	0	0	0	0	0	0	0	0	0
PRAMEF20	0	0	0	0	0	0	0	4	0	0	0	0	0	0	0	0	0	0	0	0	0	0	0	0
LRRC38	4	0	0	0	0	0	0	0	0	0	0	0	0	6	0	0	0	0	0	0	0	0	0	6
PDPN	1824	1612	2236	1307	1691	1715	2009	1512	1453	1435	1751	1313	2113	1469	1782	1323	1692	1586	1509	1948	2608	2575	2915	2305
PRDM2	2463	2278	3087	2005	2588	2527	2781	2239	1850	2135	2500	1766	2871	1927	2381	2022	2096	2100	1970	2643	3651	3978	4042	3096
KAZN	986	971	1290	734	1043	1026	993	918	764	914	952	649	1051	763	958	666	774	873	851	882	1258	1257	1264	1254
TMEM51-AS1	1	4	4	15	0	0	11	0	2	6	0	0	0	1	1	2	2	1	0	0	0	2	6	0
TMEM51	476	283	440	317	443	317	453	322	347	339	328	271	378	372	389	235	358	286	297	329	534	463	570	421
TMEM51-AS2	0	0	0	0	0	0	0	3	0	4	0	0	0	0	0	0	0	0	0	0	0	0	0	0
FHAD1	11	35	62	19	43	23	20	14	11	14	24	15	12	24	20	18	9	6	35	0	38	30	56	39
FHAD1-AS1	13	4	7	10	6	15	5	4	4	0	10	16	7	3	0	2	8	2	2	4	23	29	24	18
EFHD2	3462	3441	4368	2457	3155	3370	3715	2841	2937	2829	3167	2157	3813	2791	3166	2510	3179	2987	2929	2850	3993	3814	4743	3630
CTRC	6	0	0	2	0	0	1	0	3	4	0	5	0	0	0	4	6	0	4	0	0	0	0	2
CELA2A	0	1	0	0	6	0	0	0	0	0	0	0	0	0	0	0	1	0	0	8	0	4	2	4
CELA2B	5	0	4	3	3	6	2	3	1	4	2	0	10	4	2	0	0	3	0	5	0	12	5	9
CASP9	752	588	752	581	579	721	623	624	528	576	696	495	666	636	801	464	654	600	555	654	897	831	1094	878
DNAJC16	1174	1099	1384	720	1178	1204	1167	934	750	1173	1211	933	1273	869	1102	933	1078	996	975	1247	1552	1544	1630	1279
AGMAT	270	203	172	120	164	117	140	120	160	99	116	117	201	98	185	103	116	129	148	192	161	186	211	192
DDI2	1214	1034	1404	864	1157	1155	1184	911	819	924	990	743	1300	952	1248	862	833	852	959	1177	1557	1310	1751	1309
RSC1A1	857	679	881	495	764	655	679	659	514	582	669	489	621	509	688	459	491	490	571	713	925	998	1083	757
PLEKHM2	3178	2818	3748	2024	2940	3301	3373	2624	2452	2692	3100	2086	3091	2608	3078	2127	2893	2448	2529	2358	3514	3469	3831	3092
SLC25A34	24	22	20	2	6	16	25	22	15	6	18	26	7	6	2	8	0	16	10	5	19	8	22	4
TMEM82	0	0	0	0	0	0	0	0	0	0	0	0	0	0	0	0	0	0	0	0	0	0	0	0
FBLIM1	553	471	573	356	472	463	515	420	404	383	415	303	459	433	475	346	414	453	452	389	481	579	605	469
UQCRHL	5163	3936	5618	3163	4689	4405	4051	3749	4047	3924	4252	3147	4741	3646	4649	3654	4112	3923	3584	4271	6594	6294	7652	6014
SPEN-AS1	533	525	737	441	457	621	482	342	442	514	565	338	629	521	483	434	555	497	431	403	678	662	776	489
SPEN	29222	25854	33619	20471	27682	30289	30645	24861	21999	26305	26597	19142	29439	23840	30309	20855	20946	25021	24406	28326	39096	38476	43093	33226
ZBTB17	955	732	1170	667	573	1034	921	721	730	727	919	606	1031	624	900	640	856	777	804	863	964	1014	1266	1009
TBC1D3P6	0	0	0	0	0	0	0	0	0	0	0	0	0	0	0	0	0	0	0	0	0	0	0	0
SRARP	0	0	0	0	0	0	0	0	0	0	0	0	0	0	0	0	0	3	0	0	0	0	0	0
HSPB7	0	0	0	0	0	0	0	1	0	0	0	0	1	0	4	0	0	4	0	0	0	0	0	0
CLCNKA	0	0	1	0	0	0	4	0	0	2	0	4	0	0	5	2	0	0	2	0	0	0	0	0
CLCNKB	6	18	17	20	44	11	18	22	10	42	41	10	25	10	23	30	14	10	21	8	44	59	17	20
FAM131C	75	53	81	41	50	43	67	31	49	46	23	27	68	41	77	14	73	55	41	6	65	33	73	58
EPHA2	631	561	734	524	469	620	557	458	491	466	485	329	678	517	580	402	568	523	499	619	721	717	836	504
ARHGEF19	108	131	133	112	94	85	92	78	96	90	96	62	131	95	113	87	93	85	129	110	142	126	194	94
ANO7L1	0	3	0	6	0	6	7	2	3	0	0	2	3	9	2	3	11	4	5	14	0	7	12	2
CPLANE2	323	299	378	195	169	248	392	245	252	295	255	214	300	284	292	238	215	279	264	239	289	360	430	289
FBXO42	2045	1771	2100	1231	1875	1714	1818	1666	1396	1623	1961	1305	1800	1655	1996	1323	1457	1365	1435	1557	2329	2306	2809	2422
SZRD1	10181	9152	11295	6274	8256	8625	9635	7364	7285	7817	8917	6886	10036	7443	9198	6941	8429	7859	7633	8429	11880	11581	13890	11066
SPATA21	0	0	2	0	0	0	0	0	0	0	0	0	2	0	0	0	6	4	0	0	1	0	0	0
NECAP2	2138	1792	2531	1336	1879	1710	1668	1599	1571	1679	1767	1361	1940	1660	1813	1506	1959	1699	1535	2104	2441	2358	2670	2094
CROCCP3	129	81	158	65	123	166	75	141	81	128	54	99	101	109	122	70	88	119	86	122	144	205	154	124
RNU1-1	0	0	0	0	0	0	0	0	0	0	0	0	1	0	0	0	0	0	0	0	0	0	0	0
	0	2	0	0	4	0	5	0	0	3	2	0	0	0	0	0	0	2	2	0	0	1	6	1
	0	0	2	0	4	3	1	0	0	0	0	11	0	0	0	13	0	0	0	3	0	3	0	1
	1	0	13	3	8	3	10	4	2	0	10	5	0	4	4	0	6	3	4	0	7	2	2	8
	0	0	0	0	0	0	0	0	0	0	0	0	0	0	0	0	0	0	0	0	0	0	0	0
TRG-CCC1-1	0	0	0	0	0	0	0	0	0	0	0	0	0	0	0	0	0	0	0	0	0	0	0	0
NBPF1	633	607	794	399	802	678	606	540	540	521	674	446	819	517	689	430	509	605	577	629	914	768	866	665
CROCCP2	598	613	819	486	645	708	642	604	553	654	675	451	633	565	757	487	676	468	560	514	917	797	941	723
MST1P2	28	42	45	21	24	20	41	17	28	27	41	16	16	20	31	15	30	25	29	30	60	26	64	32
RNU1-3	0	0	0	0	0	0	0	0	0	0	0	0	0	0	0	0	0	0	0	0	0	0	0	0
	0	0	0	0	0	0	0	0	0	0	0	0	0	0	0	0	0	0	0	0	0	0	0	0
	0	0	0	0	0	0	0	0	0	0	0	0	0	0	0	0	0	0	0	0	0	0	0	0
ESPNP	5	0	3	0	0	4	0	0	2	0	0	2	0	0	0	0	2	2	1	0	1	0	0	0
TRG-CCC5-1	0	0	0	0	0	0	0	0	0	0	0	0	0	0	0	0	0	0	0	0	0	0	0	0
	0	0	0	0	0	0	0	0	0	0	0	0	0	0	0	0	0	0	0	0	0	0	0	0
RNU1-4	0	0	0	1	0	0	1	0	0	0	1	0	0	0	0	0	0	0	0	0	0	0	0	0
MST1L	0	13	7	0	4	8	0	2	4	10	4	0	0	16	0	2	8	2	8	0	12	0	0	0
MIR3675	0	0	0	0	0	0	0	0	0	0	0	0	0	0	0	0	0	0	0	0	0	0	0	0
TRG-CCC1-2	0	0	0	0	0	0	0	0	0	0	0	0	0	0	0	0	0	0	0	0	0	0	0	0
TRE-TTC3-1	0	2	5	0	1	0	0	1	1	0	6	0	4	0	0	2	7	0	4	0	3	0	0	0
TRN-GTT4-1	0	0	0	0	0	0	0	0	0	0	0	0	0	0	0	0	0	0	0	0	0	0	0	0
CROCC	518	480	674	395	494	657	577	503	466	503	539	415	584	505	571	373	558	429	534	532	630	640	757	572
RNU1-2	0	0	0	0	0	0	0	0	0	0	1	0	0	0	0	0	0	0	2	0	0	4	4	0
MFAP2	269	218	403	185	227	354	225	278	221	211	260	162	252	185	279	151	311	262	226	267	335	239	366	257
ATP13A2	3387	3270	3988	2401	3307	3510	3466	2942	3036	2782	3357	2378	3841	2981	3703	2624	3125	3120	3220	2767	3754	3725	4268	3399
SDHB	5660	4399	6334	3302	4532	4810	4510	3680	3791	4048	4456	3375	5099	4118	4478	3667	4857	4142	3966	5027	6946	6278	7957	6064
PADI2	54	48	109	56	38	50	84	37	45	55	83	50	112	76	92	69	50	94	92	83	76	50	128	113
PADI1	0	6	0	2	0	0	0	0	4	0	4	0	0	0	6	0	0	0	4	0	12	4	0	0
PADI3	2	0	6	1	4	2	0	8	0	0	0	2	0	3	2	0	0	0	2	0	8	2	1	0
MIR3972	0	0	0	0	0	0	0	0	4	0	0	0	0	0	0	0	0	0	0	0	0	0	0	0
PADI4	0	0	0	0	0	0	0	0	0	0	0	0	0	0	0	0	0	0	0	0	0	0	0	0
PADI6	0	0	0	0	0	0	0	0	0	0	0	0	0	0	0	0	0	0	0	0	0	0	0	0
RCC2	19368	16771	22061	12565	16863	17844	17498	14482	14111	15079	17401	13390	20066	15057	17264	13133	16310	15732	14242	17019	25130	24777	29347	22736
ARHGEF10L	236	280	315	208	277	282	260	259	253	200	248	167	262	267	264	219	288	209	226	302	359	316	289	256
ACTL8	62	34	62	34	54	42	51	58	68	46	36	28	114	48	63	22	76	30	50	30	64	64	69	74
LINC01654	0	0	0	0	0	0	0	0	0	0	0	0	0	0	0	0	0	0	0	0	0	0	0	0
IGSF21	8	6	6	3	4	4	10	2	11	14	12	0	10	8	4	12	0	11	4	0	20	0	22	13
KLHDC7A	0	0	0	6	0	0	0	0	0	8	0	0	0	0	0	0	0	0	0	0	0	0	0	0
PAX7	78	92	103	72	88	75	64	68	48	66	77	67	85	84	106	26	58	60	81	48	101	105	125	95
TAS1R2	0	0	0	0	0	0	0	2	0	0	0	0	0	1	0	0	0	0	0	0	0	0	0	0
ALDH4A1	845	932	1034	586	985	943	996	792	680	738	977	688	867	903	995	742	885	772	825	667	992	957	1236	1072
MIR4695	0	0	0	0	0	0	0	0	0	0	0	0	0	0	0	0	0	0	0	0	0	0	0	0
MIR1290	0	0	0	0	0	0	2	0	3	0	0	0	0	0	0	0	0	4	4	0	0	0	0	0
IFFO2	1214	1019	1200	727	1177	1156	1069	1045	701	929	1125	688	1084	895	1103	791	950	894	812	1312	1218	1350	1552	1295
UBR4	10843	10051	13160	7562	10411	11166	10990	9512	8125	10301	8998	7371	9905	8883	10919	7752	7601	8653	9109	11203	14207	12606	14779	11714
EMC1	5812	5237	6331	3825	5340	5491	5651	4717	4470	4483	5135	4175	5793	4583	5609	4146	4628	4659	4364	5409	7258	7542	8669	6721
MRTO4	6063	5272	6451	4017	5245	5546	5574	4750	4645	4605	4798	3777	5918	4941	5958	4536	5853	4533	4548	5925	6993	6806	8319	6615
AKR7L	15	23	34	24	18	24	6	11	16	10	25	18	18	24	39	17	19	9	12	29	37	38	16	19
AKR7A3	22	18	44	4	16	5	36	16	8	14	9	6	6	18	26	10	16	9	10	0	24	37	28	4
LOC100506730	158	156	191	81	146	174	199	131	128	139	114	102	207	123	189	140	125	132	142	165	317	248	313	201
AKR7A2	2398	2234	3075	1591	2342	2353	2647	2210	2072	1960	2240	1645	2715	2121	2428	1972	2635	1989	1960	2074	2928	2913	3627	2757
SLC66A1	856	713	974	579	690	831	786	773	863	707	617	526	847	646	889	554	763	800	716	764	896	850	1001	849
CAPZB	6631	5903	7824	4419	6152	6191	6527	5294	5277	5068	5875	4644	6539	5272	6278	4707	5920	5562	5000	5500	7871	7988	9453	7117
MICOS10-NBL1	0	0	0	0	0	0	0	0	0	0	0	0	0	0	0	0	0	0	0	0	0	0	0	0
MICOS10	2471	2262	2765	1718	2120	2082	2296	1779	1934	1821	2096	1493	2284	1805	2291	1492	2244	2042	1742	1946	2675	2808	3375	2621
RPS14P3	171	147	222	123	227	193	144	204	137	91	136	100	184	168	169	117	169	126	127	156	122	222	149	162
NBL1	3	3	3	3	5	4	10	18	1	5	1	2	15	10	0	1	3	3	13	12	5	8	2	4
HTR6	84	48	105	53	42	79	75	62	35	58	98	18	78	97	76	62	74	51	45	4	97	57	50	46
TMCO4	255	240	270	141	240	201	248	200	145	148	204	155	178	179	239	180	174	221	190	207	238	243	261	216
RNF186	0	0	0	0	0	0	0	0	0	0	0	0	0	0	14	0	0	0	0	0	0	0	0	0
OTUD3	1691	1477	1996	1175	1540	1808	1504	1391	1330	1502	1497	1161	1554	1142	1673	1218	1310	1300	1451	1560	2360	2278	2660	2034
PLA2G2E	0	0	0	0	0	0	0	0	0	0	0	0	0	0	0	0	0	0	0	0	0	0	0	0
PLA2G2A	0	0	0	0	0	0	0	0	2	0	0	0	0	0	0	0	0	0	0	0	0	0	0	0
PLA2G5	0	0	0	0	0	0	0	0	0	0	0	0	0	0	0	0	0	0	0	0	0	0	0	0
PLA2G2D	0	0	0	0	0	0	0	0	0	0	0	0	0	0	0	0	0	0	0	0	0	0	0	0
PLA2G2F	0	0	0	0	0	0	0	0	0	0	0	0	0	0	0	0	0	0	0	0	0	0	0	0
PLA2G2C	0	0	0	0	0	0	0	0	0	0	0	0	0	0	0	0	0	0	0	0	0	0	0	0
UBXN10	0	0	0	0	0	0	0	0	0	0	0	0	0	0	0	0	0	0	0	0	0	0	0	6
	0	0	0	0	0	0	0	0	0	0	0	0	0	0	0	0	0	0	0	0	0	0	0	0
VWA5B1	12	0	0	0	0	0	11	6	2	0	2	0	0	4	0	0	0	4	0	8	2	4	2	0
LINC01141	0	0	0	0	0	6	0	0	0	0	0	0	0	0	0	0	0	0	0	0	0	0	0	0
CAMK2N1	328	330	404	267	358	331	362	241	212	244	366	151	330	327	234	174	319	292	233	228	459	437	361	273
MUL1	1966	1990	2565	1355	1964	2026	2108	1685	1639	1645	1907	1458	2159	1670	2150	1575	1913	1796	1845	1688	2507	2370	2878	2401
FAM43B	35	29	65	28	26	50	43	50	36	24	50	28	132	40	34	29	43	58	44	8	49	60	97	30
CDA	22	16	26	24	6	20	10	28	18	33	26	0	31	17	34	16	24	12	23	42	8	40	12	12
PINK1	855	795	916	605	896	980	858	739	686	641	860	526	900	703	847	566	727	717	773	799	904	917	1194	1103
MIR6084	0	0	0	0	0	0	0	0	0	0	0	0	0	0	0	0	0	0	0	0	0	0	0	0
PINK1-AS	224	194	241	155	222	199	168	219	256	228	152	184	221	250	276	237	213	192	196	199	270	264	385	279
DDOST	13507	11554	14995	8517	11779	12046	12622	10784	10940	11111	12078	8980	13713	11065	13392	9587	12228	11652	10849	12367	16768	16589	18959	14797
KIF17	328	423	565	281	299	352	377	326	315	383	394	275	439	448	357	334	297	325	284	298	458	513	493	411
SH2D5	470	380	482	289	336	400	454	304	350	328	365	272	380	362	455	243	322	321	293	332	501	525	561	408
HP1BP3	4105	4194	5184	3113	4072	4589	3957	3807	3392	4143	3866	2789	3874	3372	3729	3025	3288	3353	2951	4064	7157	6443	6819	4495
EIF4G3	10899	9243	12402	7260	10363	10429	10376	8396	7790	9647	10127	6974	10629	8326	10015	7348	8743	8694	8437	10030	14510	14038	16441	12552
MIR1256	0	0	0	0	8	0	0	0	0	0	0	0	0	0	0	0	0	0	0	0	0	0	0	0
ECE1	3274	2975	3619	1953	2655	3002	2972	2407	2322	2383	2644	1974	2910	2231	2941	2022	2634	2303	2386	2554	3139	3295	4121	2915
ECE1-AS1	2	0	0	0	0	4	0	0	10	0	0	0	0	0	0	0	0	1	0	0	0	0	0	0
NBPF3	936	867	1292	597	1079	892	939	728	736	833	910	648	983	815	970	690	844	833	701	1071	1320	1215	1611	1206
ALPL	302	205	307	188	315	275	284	182	219	262	257	187	215	244	293	191	249	176	258	209	292	309	366	217
RAP1GAP	278	326	457	223	325	299	284	276	273	281	352	174	284	212	274	212	299	268	237	299	333	404	404	329
USP48	4022	3683	4616	2901	3966	3944	4087	3257	2873	3330	3985	2831	4000	3143	3962	3103	3654	3202	3109	3802	5484	5644	6472	4971
LDLRAD2	0	1	0	0	0	0	3	4	0	0	0	1	0	2	0	0	0	2	0	0	0	0	0	0
HSPG2	552	554	727	328	457	557	582	440	383	476	498	306	547	433	575	375	379	479	521	460	604	556	552	499
CELA3B	0	0	0	1	0	0	0	0	0	0	0	0	0	0	0	0	0	0	0	0	0	0	0	0
CELA3A	2	0	0	0	0	0	0	0	0	0	0	0	0	0	0	0	0	0	0	0	0	0	0	0
LINC01635	29	5	17	0	11	9	4	8	2	45	13	8	20	11	0	4	0	5	4	23	17	11	19	3
LINC00339	203	197	349	162	198	218	149	196	269	189	209	131	208	232	233	219	251	191	185	186	332	308	319	226
CDC42	11238	9493	12869	7333	10041	10163	10325	8239	8083	8445	9654	7297	10721	8024	9770	7746	9479	7786	7493	10315	13959	13627	16409	12517
WNT4	4	16	0	6	29	15	13	4	2	14	11	6	32	11	4	12	18	9	14	2	12	14	6	11
MIR4418	0	0	0	0	0	0	0	0	0	0	0	0	0	0	0	0	0	0	0	0	0	0	0	0
ZBTB40	3099	2838	3628	2140	2760	3155	3112	2620	2415	2877	3045	2143	3014	2323	2869	2284	2640	2590	2406	2765	4142	4181	4521	3642
EPHA8	602	478	536	409	477	523	549	477	424	530	461	339	491	418	497	354	498	489	419	450	553	436	619	478
MIR6127	0	0	0	0	0	0	0	0	0	0	0	0	0	0	0	0	0	0	0	0	0	0	0	0
C1QA	0	0	0	0	0	0	0	0	0	0	0	0	0	0	0	0	0	0	0	0	0	0	0	0
C1QC	0	0	0	0	0	0	0	0	0	0	0	0	0	0	0	0	0	0	0	0	0	0	0	0
C1QB	0	0	0	0	0	0	0	0	0	0	0	0	0	0	0	0	0	0	0	0	0	0	0	0
EPHB2	944	764	938	606	727	798	852	634	693	653	736	517	780	650	866	581	775	612	696	665	916	947	1060	918
MIR4684	0	0	0	0	0	0	0	0	0	0	0	0	0	0	0	0	0	0	0	0	0	0	0	0
MIR4253	0	0	0	0	0	0	0	0	0	0	0	0	0	0	0	0	0	0	0	0	0	0	0	0
LACTBL1	0	0	0	0	0	0	0	0	0	0	0	0	0	0	0	0	0	0	8	0	2	4	0	0
TEX46	6	3	17	0	0	8	2	2	6	8	0	8	6	3	6	2	0	0	9	4	10	10	10	3
KDM1A	11460	10599	13353	7565	10675	10434	11013	9051	9017	9268	11096	7787	11701	8742	10676	8121	10288	9215	8523	11146	14400	14337	16551	13498
MIR3115	0	0	0	0	0	0	0	0	0	0	0	0	0	0	0	0	0	0	0	0	0	0	0	0
	0	0	0	0	0	0	0	0	0	0	0	0	0	0	0	0	0	0	0	0	0	0	0	0
LUZP1	3911	3241	4286	2414	3121	3285	3299	2803	2571	2796	3155	2485	3738	2729	3310	2582	2544	2710	2700	3890	4796	4893	5509	4179
HTR1D	20	32	48	9	24	11	8	18	16	14	16	18	12	38	32	17	30	27	18	28	48	18	50	13
LINC01355	41	63	83	27	65	58	52	78	70	28	36	41	88	41	73	47	41	68	41	106	99	156	153	75
HNRNPR	21856	18149	26462	14668	19986	19577	20387	17000	16397	17552	18892	15240	21148	16611	19980	15640	18482	16955	16068	20335	29505	29404	33717	26229
ZNF436	666	690	947	479	829	720	634	579	616	694	642	531	636	515	678	551	499	576	549	753	1101	1015	1131	1032
ZNF436-AS1	26	60	52	45	20	70	34	36	52	44	34	35	73	18	36	36	35	35	43	68	85	83	128	57
TCEA3	4	4	7	2	14	2	8	14	4	2	1	11	33	4	9	8	10	2	6	0	11	18	10	9
ASAP3	539	564	657	361	469	472	502	364	447	495	448	242	437	406	466	299	475	409	411	310	535	580	703	423
E2F2	1496	1334	1490	977	1329	1439	1568	1187	1167	1333	1206	989	1521	1212	1474	1087	1393	1266	1275	1552	1725	1738	2280	1819
LOC101928163	0	4	0	2	0	16	0	0	0	0	0	0	0	0	7	0	0	0	2	8	0	6	6	2
ID3	4096	3607	4672	2702	3571	3987	3856	3185	3424	3297	3523	2649	3767	3027	3647	2673	3579	3457	3349	2308	4213	4160	5422	4009
MDS2	0	0	0	0	0	0	0	0	0	0	0	0	0	0	0	0	0	0	0	0	0	0	0	0
RPL11	29586	24617	34047	20634	25374	27545	26278	22811	22759	22258	26350	19502	26165	20398	27095	20130	24193	21832	21066	23071	36267	37308	46769	35579
ELOA	6097	5528	6884	3918	5483	5650	5730	4700	4352	5101	5420	4083	5856	4717	5433	4627	5081	4310	4420	5389	7873	7594	8627	6667
ELOA-AS1	19	13	29	7	14	21	35	14	15	25	25	0	19	24	28	9	16	27	18	33	15	41	50	30
PITHD1	2891	2365	3220	1939	2485	2915	2509	2189	2087	2508	2652	1782	2816	2024	2630	1938	2409	2165	2034	2063	3391	3160	3837	3097
LYPLA2	1984	1887	2329	1326	1547	1974	1878	1488	1808	1602	1904	1247	2222	1660	2132	1511	1738	1519	1787	1573	2439	2275	2629	2199
GALE	992	958	1170	553	636	930	922	681	818	625	941	619	1001	683	814	711	765	769	699	925	1098	1022	1154	915
HMGCL	662	532	647	401	453	604	493	464	460	513	519	364	501	442	514	400	515	464	386	444	696	673	830	652
FUCA1	1111	1093	1288	750	928	1128	969	857	747	1010	1055	663	995	845	1032	684	949	893	738	1245	1360	1425	1346	1239
CNR2	0	6	0	0	0	0	0	0	0	0	0	0	0	0	0	0	0	0	2	0	0	0	2	0
MIR378F	0	0	0	0	0	0	0	0	0	0	0	0	0	0	0	0	0	0	0	0	0	0	0	0
PNRC2	4480	4240	5576	3200	4537	4019	4334	3332	3266	3732	4261	3055	4451	3642	4463	3033	4397	3424	3211	4554	6158	5985	7054	5596
SRSF10	12708	11144	15472	8334	11981	11824	11914	10075	9394	11334	12008	9220	13054	9924	12026	9259	11639	9803	9123	13332	17500	17349	20103	15460
MYOM3	4	0	0	0	0	0	2	0	0	0	0	0	0	0	0	0	0	14	4	0	0	0	0	0
IL22RA1	0	0	0	0	0	0	0	0	0	0	0	0	0	0	0	0	0	0	0	0	0	0	0	0
IFNLR1	494	422	470	265	344	377	469	268	246	342	455	256	350	409	379	306	263	354	394	398	543	460	620	423
LINC02800	0	0	7	0	0	0	0	0	0	0	0	0	0	0	0	0	0	0	0	0	0	0	10	0
GRHL3	6	16	47	12	23	8	23	18	19	8	0	0	8	1	11	12	17	17	24	13	38	5	14	5
STPG1	625	546	877	521	485	690	641	521	470	468	558	382	683	546	621	440	513	613	469	443	862	826	949	860
NIPAL3	2415	1976	2706	1491	2013	2222	2159	1704	1585	1852	1796	1646	2232	1801	2019	1558	1658	1745	1745	1879	2783	2735	3311	2477
RCAN3AS	0	0	0	0	0	4	2	0	0	1	2	0	0	0	0	0	0	1	0	0	0	0	0	0
RCAN3	967	850	1101	656	836	917	891	819	696	622	842	645	963	819	792	675	648	759	666	970	1064	943	1259	1017
NCMAP-DT	222	199	279	146	204	174	225	115	131	175	183	120	268	140	201	131	112	138	148	201	265	243	344	195
NCMAP	0	0	0	0	0	8	2	0	0	0	0	0	0	0	0	0	0	0	0	0	0	0	8	4
SRRM1	10152	8845	11036	7063	9327	9258	8779	7364	6771	8050	9392	6722	10502	8139	8892	6827	7450	7816	7164	8620	16931	16486	19480	14233
CLIC4	9371	7744	10877	5995	8477	8188	8650	6791	6082	7363	8122	6397	8903	6770	8105	6355	7508	6822	6202	8919	11428	11586	13960	10303
RUNX3	158	157	163	68	103	98	140	130	173	112	133	166	165	144	168	116	68	119	123	85	157	158	174	143
MIR6731	0	0	0	0	0	0	0	0	0	0	0	0	0	0	0	0	0	0	0	0	0	0	0	0
MIR4425	0	0	0	0	0	0	0	0	0	0	0	0	0	0	0	0	0	0	0	0	0	0	0	0
SYF2	1127	989	1351	853	1029	1075	1108	872	916	1009	1109	877	1244	869	1065	805	1082	1032	852	1270	1557	1575	1999	1489
RSRP1	1114	1110	1428	1063	1166	1439	1212	1053	1053	1374	1445	952	1342	1159	1117	992	1226	1126	1027	1063	2074	1921	2189	1346
RHD	0	1	0	0	0	0	0	0	0	0	0	0	0	0	0	0	0	0	0	0	0	0	0	0
TMEM50A	1943	1571	2295	1209	1538	1575	1566	1306	1302	1360	1616	1069	1700	1218	1515	1234	1492	1272	1236	1446	1900	2063	2586	1917
RHCE	14	10	22	6	2	14	4	6	10	0	7	0	4	2	0	14	8	4	4	0	14	10	25	2
MACO1	1765	1436	1925	1135	1547	1704	1651	1423	1209	1510	1548	1333	2011	1474	1680	1371	1589	1419	1470	1750	2562	2312	3028	2418
LDLRAP1	1541	1694	2014	1137	1622	1867	1554	1367	1246	1290	1776	1066	1648	1516	1442	1202	1516	1408	1303	1634	2142	2027	2269	1566
MAN1C1	198	135	148	76	161	184	112	132	100	134	175	71	173	138	105	88	156	104	126	88	134	196	220	205
SELENON	6673	5890	7620	4264	6290	6448	6564	5179	4746	5348	5971	4206	6636	5033	6419	4380	5254	5225	5171	5854	6887	7004	8045	6114
MTFR1L	1435	1335	1837	907	1189	1183	1449	1126	1143	1142	1326	912	1367	1121	1305	1169	1224	1213	1181	1208	1856	1852	1960	1633
LOC646471	93	96	72	59	54	60	45	46	59	80	48	47	70	48	71	39	39	60	55	111	150	111	108	67
AUNIP	1026	924	1252	779	793	985	1093	872	627	778	821	709	983	971	1009	743	918	791	809	808	1551	1514	1674	1249
PAQR7	256	301	320	268	199	275	253	386	280	235	330	181	340	247	304	238	192	250	290	282	376	357	513	380
STMN1	11379	9706	13089	7418	9844	10134	10139	8347	8123	8710	9956	7147	11071	7796	9985	7971	9950	7747	7614	9926	14499	14713	16473	12880
MIR3917	0	0	0	0	0	0	0	0	0	0	0	0	0	0	0	0	0	0	0	0	0	0	0	0
PAFAH2	565	618	692	413	663	676	715	550	608	551	773	463	702	590	687	535	740	535	528	508	924	914	1119	809
EXTL1	13	33	17	16	6	19	20	31	29	33	9	18	10	22	14	24	22	17	22	16	23	48	39	38
SLC30A2	0	0	0	0	0	0	0	0	0	4	0	0	0	0	1	0	0	2	0	0	4	2	0	0
LOC105376910	0	0	0	0	0	0	0	0	0	0	0	0	0	0	0	0	0	0	0	0	0	0	0	0
TRIM63	0	0	0	0	0	0	0	0	0	0	0	0	0	0	0	0	0	1	0	0	0	0	0	0
PDIK1L	902	714	898	562	912	809	855	649	523	593	670	594	791	662	885	609	809	632	511	921	1137	1126	1165	981
FAM110D	0	0	0	0	2	16	0	5	4	0	0	3	10	4	0	0	2	4	2	0	2	0	6	6
	0	0	0	0	0	0	0	0	0	0	0	0	0	0	0	0	0	0	2	0	6	0	0	0
ZNF593	1565	1458	1537	886	1243	1497	1587	1164	1272	1087	1412	1045	1563	1186	1751	1078	1441	1469	1343	1144	1673	1665	2240	1665
CNKSR1	53	63	82	46	46	60	74	53	93	56	97	53	38	47	56	36	56	55	80	24	138	79	109	87
CATSPER4	0	0	0	0	1	2	0	0	0	2	0	0	0	1	2	0	0	0	0	0	0	0	0	0
ZPLD2P	6	0	0	0	0	0	1	1	0	0	0	0	0	0	0	0	1	0	0	0	0	0	6	0
CEP85	3039	2612	3770	2040	2896	2867	3063	2478	2189	2609	3112	1987	2928	2368	2904	2189	2352	2330	2213	3020	4347	3915	4546	3321
SH3BGRL3	1074	857	1218	821	829	1081	980	831	913	856	875	804	1258	875	1019	680	790	887	967	790	1193	1202	1410	1074
UBXN11	628	657	794	434	564	651	560	598	455	481	707	398	726	498	605	424	607	558	529	566	797	814	1040	684
CD52	0	0	0	0	0	0	0	0	4	4	0	0	0	0	0	4	0	0	0	0	0	0	0	0
CRYBG2	83	12	50	42	38	36	35	32	47	20	19	38	29	42	18	40	30	33	32	0	64	20	33	44
ZNF683	0	0	0	0	0	0	0	0	0	0	0	0	0	0	0	0	0	0	0	0	0	0	0	0
LIN28A	0	0	0	0	0	0	0	2	0	0	4	1	0	0	0	0	0	0	0	0	4	0	0	0
DHDDS	1283	1253	1760	942	1361	1145	1312	1065	1021	997	1218	831	1353	1179	1486	1014	1271	1141	1143	1317	1944	1862	2083	1546
DHDDS-AS1	4	0	13	6	12	8	9	1	6	0	4	0	11	4	0	6	12	6	7	0	4	4	3	1
HMGN2	24255	22097	29236	16634	23054	21917	22883	19005	19301	20354	21817	16522	24411	18635	22086	17806	23125	17953	17245	21990	30002	29559	33875	25726
RPS6KA1	2335	1959	2750	1482	1868	2198	2215	1668	1812	1686	2095	1423	2000	1775	2107	1662	1945	1933	1744	1766	2318	2437	3397	2362
MIR1976	0	0	0	0	0	0	0	0	0	0	0	0	0	0	0	0	0	0	0	0	0	0	0	0
LOC101928728	57	71	69	43	61	86	62	63	83	39	40	35	51	81	55	42	29	46	52	61	38	64	96	81
ARID1A	9192	7603	10016	6287	8892	9050	9154	7412	6845	7922	8067	5929	9118	7249	8859	6368	6853	7608	7557	8719	10824	10637	12427	9807
PIGV	316	247	383	217	271	331	388	346	280	362	371	206	356	236	328	217	337	320	285	209	394	432	579	456
ZDHHC18	1914	1820	2392	1376	1855	2023	1923	1643	1707	1568	1967	1173	2084	1658	2038	1422	1865	1572	1653	1655	2390	2224	2910	2169
SFN	4	10	12	19	0	8	2	14	2	2	0	14	18	25	0	2	2	6	16	2	10	20	4	6
GPN2	1235	1005	1485	846	1017	1108	1210	944	996	1022	1080	754	1360	935	1171	830	1112	1087	912	1188	1264	1543	1837	1316
GPATCH3	736	623	748	635	650	820	679	625	553	607	788	490	888	602	564	540	790	619	713	645	808	795	1036	953
NUDC	9602	8233	10493	6219	8355	9084	9053	7680	7654	7359	8361	6419	9814	7239	8521	6512	8569	7880	7326	8114	10872	11285	12841	10291
NR0B2	0	0	0	0	0	0	0	0	0	0	0	0	0	0	0	0	0	0	0	0	0	0	0	0
KDF1	10	4	21	6	16	2	11	2	13	0	0	12	4	6	0	12	0	4	0	0	5	8	16	6
TRNP1	407	426	412	260	431	354	438	334	359	332	334	217	354	259	330	288	285	341	325	191	393	315	542	411
TENT5B	35	48	65	22	48	62	43	54	53	56	66	42	64	56	40	58	51	40	71	44	62	54	72	64
SLC9A1	1409	1143	1729	1028	1185	1314	1451	1160	1120	1152	1325	836	1357	1018	1439	1034	1188	1222	1161	1136	1588	1632	1793	1327
WDTC1	2815	2704	3058	1930	2411	2787	2767	2298	2252	2276	2733	1901	3158	2379	2863	2034	2420	2471	2451	2726	3160	3227	3773	2937
TMEM222	1329	1153	1580	915	1088	1220	1265	992	1030	1028	1423	815	1293	1150	1271	843	1092	1070	1034	1012	1495	1425	1707	1385
ACTG1P20	84	83	99	88	157	127	133	108	87	80	139	49	77	68	82	104	47	89	73	128	124	124	116	123
RNU6-48P	0	0	0	0	0	0	0	0	0	0	0	0	0	0	0	0	0	0	0	0	0	0	0	0
SYTL1	13	30	20	19	26	29	31	38	26	18	21	27	39	16	42	21	30	44	14	20	35	19	33	32
MAP3K6	470	668	793	446	626	611	610	400	534	506	655	312	743	515	588	392	503	487	479	357	724	634	768	667
FCN3	0	4	0	1	0	1	0	0	0	1	8	0	4	0	4	0	0	0	0	0	0	6	2	0
CD164L2	0	2	0	0	0	0	8	0	0	0	0	0	0	0	0	0	0	0	0	0	0	2	0	0
GPR3	7	10	6	6	20	12	8	5	22	4	16	0	8	16	20	6	26	18	17	4	18	6	10	21
WASF2	6614	6345	8620	4739	6856	6778	7126	5528	5247	6029	6396	4821	7314	5958	7093	5233	5797	6041	5901	6983	8793	8653	10519	7792
AHDC1	1099	872	1111	661	799	1052	951	745	694	1004	973	785	912	846	966	657	834	802	968	595	958	828	1189	956
FGR	0	0	0	0	0	0	0	0	0	0	0	0	0	0	0	0	0	0	0	0	0	0	0	2
IFI6	138	125	144	95	116	171	182	129	83	103	137	98	127	146	173	123	142	128	97	93	161	128	175	184
FAM76A	930	690	985	646	762	740	867	664	669	684	880	706	911	800	826	797	784	677	650	690	1020	1181	1182	976
STX12	3008	2501	3282	2010	2685	2643	2809	2350	2270	2473	2629	2292	3033	2424	2829	2204	2467	2379	2084	2679	3881	3598	4498	3459
PPP1R8	5566	4796	6551	3474	5251	5237	5065	4283	3977	4440	5079	3799	5330	4143	5214	3809	4701	4053	3971	5009	6988	6986	8231	6423
SCARNA1	3	5	17	0	2	4	1	3	2	20	10	3	2	5	6	8	2	9	6	0	19	10	10	6
THEMIS2	122	152	94	94	107	172	139	114	136	124	50	76	129	102	101	125	150	132	154	127	163	143	193	195
RPA2	5503	5061	6744	3856	5076	5446	5216	4676	4672	4593	5165	3907	5536	4661	5163	4198	5187	4310	4559	5229	7124	6723	7968	6338
SMPDL3B	593	541	711	381	425	608	558	521	473	384	534	391	599	391	486	387	530	486	405	545	532	649	721	544
XKR8	773	712	1013	556	789	789	729	716	631	661	728	532	651	595	795	604	725	765	657	699	823	1019	1069	838
EYA3	4531	4107	5228	3157	4136	4574	4249	3739	3480	4129	4488	3407	4580	3347	4561	3422	4020	3580	3625	4623	6316	6117	7297	5269
PTAFR	68	50	83	36	68	87	76	68	30	61	64	45	56	40	74	38	52	76	77	73	58	55	95	79
DNAJC8	12337	10670	14440	7972	11668	10932	11523	8864	9034	9564	10691	8374	12572	9495	10476	8356	10817	9133	8655	10853	16436	15607	19061	13943
ATP5IF1	5329	4598	6110	3746	4581	5275	4814	4240	4164	4095	4658	3488	5403	3728	5093	3526	4777	4496	4256	4174	6117	6046	7542	5444
SESN2	3636	3480	4290	2485	3348	3641	3721	2899	2774	3181	3392	2644	3617	2879	3613	2592	3104	3035	2938	3076	4223	3806	4994	3900
MED18	1290	1035	1216	769	1100	1126	1172	878	1020	1216	1184	853	1336	984	1088	844	1221	1095	941	1001	1613	1711	1957	1310
PHACTR4	4414	4118	5133	2980	4371	4514	4318	3575	3220	3828	4074	3432	4679	3371	4093	3246	3703	3821	3638	4605	5703	5742	6783	5121
RCC1	15917	13998	18231	10351	14010	15178	14784	12387	12903	13005	14262	10878	15712	12341	15002	10637	13203	12437	12517	13524	18808	18276	22032	17483
SNHG3	1287	1388	1680	1105	1227	1586	1447	1101	1250	1294	1362	1079	1486	1118	1307	1082	1254	1082	1013	1151	2205	2120	2315	1599
SNORA73A	48	57	78	48	43	77	61	81	51	35	54	39	75	41	71	43	40	26	29	37	78	74	85	32
SNORA73B	34	28	28	25	40	28	24	44	38	38	34	24	33	21	13	15	20	20	30	45	48	72	41	33
TRNAU1AP	1231	1194	1458	874	1323	1244	1200	961	1040	1065	989	848	1213	927	1376	999	1189	869	997	1074	1437	1509	1751	1414
SNHG12	381	418	563	255	360	441	324	274	320	408	387	289	355	261	365	287	415	331	243	284	545	535	561	389
SNORD99	14	21	12	9	0	15	18	17	11	18	33	12	16	18	26	22	28	15	6	4	24	11	25	18
SNORA61	87	70	117	62	79	87	66	61	60	57	137	58	56	84	87	49	41	74	55	81	128	127	156	82
SNORA44	30	18	33	6	16	21	26	7	9	10	12	11	27	0	4	15	13	4	3	24	21	31	15	16
SNORA16A	44	24	50	32	28	27	8	18	25	21	40	35	39	36	41	16	28	17	19	30	45	57	33	34
RAB42	0	2	24	5	0	3	6	0	9	6	0	2	6	1	4	4	6	5	0	8	11	6	1	10
TAF12	1005	917	1215	672	1028	960	932	812	723	771	896	686	1140	731	918	781	874	721	803	993	1350	1526	1676	1230
RNU11	2	0	8	0	2	3	4	0	1	3	8	1	6	0	0	0	16	0	1	8	0	0	0	0
GMEB1	1021	877	986	576	823	965	939	801	772	793	895	693	981	799	979	632	908	871	769	897	1334	1243	1484	1162
	0	0	0	0	6	0	0	0	1	2	15	6	0	2	1	5	4	0	0	0	6	0	8	0
YTHDF2	8985	7275	9957	5571	8073	8052	8372	6665	6678	6805	8026	5939	9117	6888	8184	6411	7664	6513	6550	7435	10792	10439	12988	10116
OPRD1	34	22	20	18	0	18	17	33	28	30	45	18	11	30	32	18	28	34	34	18	26	32	33	28
EPB41	11378	9457	12142	6993	10017	10002	10510	8300	7660	8925	9545	6914	10706	8368	9957	7488	8191	8167	7926	10052	14689	14205	17352	13241
TMEM200B	17	10	38	10	28	9	11	25	20	8	26	10	14	13	24	27	26	16	4	27	11	28	26	12
SRSF4	10221	8715	11971	6531	9489	9646	9752	7555	7610	8259	9429	7207	9934	7908	9164	7090	8686	8041	8246	8630	12396	12237	14482	11109
MECR	1380	1288	1511	849	1000	1095	1082	963	955	893	820	831	934	901	1037	818	966	771	839	902	1257	1227	1635	1019
PTPRU	5537	4791	5803	3304	4550	4919	4601	3636	3796	3626	4065	2998	4680	3899	4525	2980	3929	3933	3792	3940	4949	4851	5849	4423
LINC01756	2	4	0	0	0	0	4	2	0	0	0	0	0	0	2	0	0	0	0	0	0	0	0	0
LINC01648	0	0	0	0	0	0	0	0	0	0	0	0	0	0	0	0	0	0	0	0	0	0	0	0
MATN1	19	5	5	18	17	18	15	7	16	16	4	8	32	33	28	15	12	6	22	20	13	19	26	27
MATN1-AS1	8	2	2	5	8	23	16	7	9	7	0	0	10	12	8	7	14	10	9	26	33	26	11	12
LAPTM5	2	0	8	0	0	6	0	0	0	2	0	0	0	10	0	0	0	2	0	0	6	4	1	5
MIR4420	0	0	0	0	0	0	0	0	0	0	0	0	0	0	0	0	0	0	0	0	0	0	0	0
LOC400748	0	0	0	0	0	0	0	0	0	0	0	0	0	0	0	0	0	0	0	0	0	0	0	0
SDC3	2231	2143	2598	1633	1925	2064	2134	1984	1778	1705	1922	1397	2324	1777	1877	1325	1604	1811	1978	1991	2417	2591	2750	2068
PUM1	9458	7983	11463	5882	8626	8771	9001	7333	6588	7757	8502	6318	9421	7214	9205	6408	7936	7675	7765	7922	12185	11685	14020	10821
SNORD103A	8	1	0	2	11	3	5	6	2	3	0	3	0	2	2	3	0	1	4	0	7	5	3	2
SNORD103B	19	2	3	4	12	9	2	3	4	4	3	1	7	3	1	7	0	4	4	0	1	15	5	5
SNORD103C	0	0	1	0	0	3	3	2	4	0	0	0	0	1	0	0	12	0	0	0	0	1	0	2
NKAIN1	245	211	276	148	267	276	220	145	171	191	215	130	209	181	200	136	169	179	153	189	311	185	253	239
SNRNP40	6798	5935	7182	4168	5960	5731	6078	5156	5133	5224	5598	4296	6462	5037	5780	4791	5922	4915	4800	6016	8109	8172	9697	7509
ZCCHC17	3532	2938	4114	2147	2864	3017	3222	2454	2438	2819	3085	2022	3364	2473	3139	2336	2991	2412	2496	3240	4700	4277	4932	4038
FABP3	21	37	59	33	16	29	26	28	25	38	32	19	25	41	30	33	29	44	36	68	57	20	97	58
SERINC2	716	653	809	460	593	682	608	566	634	597	667	527	905	489	616	383	538	537	586	623	747	673	895	743
LDC1P	0	0	0	0	0	0	0	0	0	0	0	0	0	0	0	0	0	0	0	0	0	0	0	0
LINC01226	0	0	0	0	0	0	0	0	0	0	0	0	0	0	0	0	0	0	0	0	0	0	0	0
TINAGL1	0	0	0	0	0	8	2	0	0	0	0	0	2	0	0	0	0	0	0	0	0	0	0	0
HCRTR1	17	11	26	4	10	3	4	0	3	2	11	4	0	0	0	4	1	3	2	12	4	3	6	2
PEF1	6002	5252	6703	3559	5349	5600	6046	4469	4676	4950	5713	4107	5872	4479	5774	4375	5199	4720	4634	5519	7579	7416	8511	6556
COL16A1	2	3	1	0	0	7	2	0	6	0	0	0	0	0	2	2	6	4	3	0	10	4	6	0
ADGRB2	1185	1019	1223	797	992	1205	987	833	839	878	1084	767	987	909	1086	859	937	872	1005	788	1229	1225	1150	933
MIR4254	0	2	0	0	0	0	0	5	1	2	0	0	0	5	0	0	3	0	0	0	0	2	0	0
SPOCD1	8	19	6	8	17	8	14	24	21	13	28	12	20	11	43	12	44	22	54	22	21	21	24	19
PTP4A2	11527	10352	13506	7808	10550	10812	10537	8902	8090	9259	9571	7878	11756	9129	10654	8421	9614	9081	8470	10368	14775	14480	17491	13439
KHDRBS1	19372	17790	23607	13261	17796	17716	19078	15609	15193	15747	17558	13188	19042	15486	18451	14788	17114	15275	14339	18776	24412	24060	28941	21594
TMEM39B	1451	1195	1647	1007	1484	1416	1475	1095	1319	1231	1548	984	1522	1245	1565	1184	1397	1236	1257	1193	1710	1873	1953	1601
MIR5585	0	1	0	0	0	0	0	0	0	0	0	0	0	3	0	0	0	0	0	0	0	0	0	0
KPNA6	7002	6421	8850	4956	6675	7082	7198	5841	5307	6638	6511	5178	7531	6002	6859	5260	5857	5864	5623	7154	11271	10874	12174	9817
TXLNA	8118	7215	9431	5375	7785	7968	7731	6851	6487	7333	8108	5542	8265	6645	8276	6079	7529	7003	6655	7729	12409	11886	14459	10224
CCDC28B	565	574	607	326	584	487	500	374	376	496	478	357	588	392	426	340	474	396	360	558	571	670	698	618
TMEM234	460	405	508	307	402	416	419	360	361	350	441	311	344	453	452	416	396	332	329	498	530	565	564	441
IQCC	498	544	798	415	457	564	456	391	435	386	432	365	493	428	585	354	503	380	401	534	844	718	850	592
DCDC2B	14	20	36	24	9	34	25	35	28	22	29	16	20	4	18	21	18	22	8	31	33	21	13	21
EIF3I	25123	22070	29046	15922	22065	22736	23811	18840	19675	19626	22729	16747	24968	19325	22852	17730	22020	19615	18930	21796	29106	28290	34041	25908
MTMR9LP	26	13	11	10	0	8	26	16	4	12	19	9	21	6	30	10	9	17	13	14	44	17	11	32
FAM167B	0	3	1	2	0	2	2	0	2	0	0	2	0	6	0	1	0	2	0	0	0	0	4	0
LCK	0	1	0	0	0	0	0	0	0	2	14	1	12	0	0	0	0	0	0	0	0	0	0	0
HDAC1	17197	15898	19586	11412	15737	15793	15828	13141	13374	13609	15369	11810	16744	13379	15373	11748	14764	13465	12525	15233	21091	20237	23431	17780
MARCKSL1	17988	16452	20689	12735	16680	17103	17519	14266	14814	14053	16903	11897	17762	14606	17615	12652	16071	14635	14738	15207	20035	19839	23318	18699
FAM229A	53	55	76	38	53	79	42	45	68	48	42	45	66	51	82	55	67	54	59	127	115	67	85	62
TSSK3	157	167	172	127	132	199	145	173	207	169	184	107	133	140	170	173	162	172	119	177	277	264	289	124
BSDC1	4085	3910	5079	2670	3955	4206	4270	3520	3268	3780	4257	3090	4571	3391	4251	3091	4089	3934	3294	3560	5874	5532	6855	5035
ZBTB8B	270	245	427	163	252	235	375	260	151	256	297	193	292	223	337	225	228	244	191	303	441	328	409	359
ZBTB8A	1456	1118	1585	945	1292	1232	1302	1256	976	1233	1638	1056	1906	1407	1387	1219	1426	1268	1277	1796	2433	2165	2411	2080
ZBTB8OS	875	785	897	578	782	867	841	625	694	686	848	460	838	680	815	648	696	654	572	1022	1207	1015	1322	925
RBBP4	13297	11297	15380	8150	12146	12099	12651	10363	9892	11059	11612	9206	13052	10527	12894	10091	11611	10130	9919	12853	18870	17990	20822	15936
SYNC	32	3	16	14	6	4	38	28	12	15	25	10	10	27	24	42	20	6	9	76	13	20	41	27
NHSL3	2688	2497	3355	1905	2549	2847	2851	2211	2270	2196	2611	1905	2972	2325	2706	2030	2345	2419	2428	2394	3056	3110	3580	2774
YARS1	20001	17020	21964	13006	17184	17844	17761	15427	14102	15842	17442	12447	19473	14859	17380	13882	17009	14996	14603	16750	23552	23216	27353	20722
S100PBP	2469	2118	2924	1514	2112	2091	2263	1789	1727	1902	2118	1671	2263	1592	2130	1713	1950	1682	1577	2138	3000	3138	3670	2679
FNDC5	58	126	120	61	118	106	90	63	86	52	58	38	90	71	73	38	67	72	72	77	82	93	110	87
HPCA	5	0	2	2	0	2	15	10	6	8	4	2	12	6	2	6	4	0	21	7	9	4	10	10
TMEM54	501	456	565	358	400	612	557	402	483	409	593	300	563	486	523	352	460	476	457	300	465	487	632	455
RNF19B	1500	1358	1918	1039	1350	1470	1482	1153	963	1172	1435	934	1469	1103	1549	1042	1384	1062	1202	1291	1596	1541	2001	1542
AK2	16325	14354	19693	11184	14719	15086	15068	12291	12120	13054	14209	11068	15599	12477	15027	11611	14355	12610	12123	15649	21400	20296	23906	18009
AZIN2	213	149	271	97	173	161	151	123	110	128	92	146	177	144	119	97	149	161	142	52	219	170	188	155
TRIM62	721	624	836	399	746	711	702	500	525	560	568	527	718	468	554	531	524	589	589	559	891	812	1087	734
ZNF362	976	1020	1280	693	1106	853	1097	868	810	897	1120	703	1021	981	955	750	749	852	914	834	1213	1243	1488	1061
A3GALT2	0	0	0	2	0	0	8	4	0	0	0	0	0	0	0	0	0	0	2	0	0	0	0	0
PHC2	3908	3530	4644	2402	3145	3715	3534	3097	3100	2874	3271	2610	3656	2774	4035	2572	3200	3038	2858	3137	4462	4116	5049	4118
MIR3605	0	0	0	0	0	0	0	0	0	1	0	0	6	4	0	0	0	6	0	0	0	1	0	0
PHC2-AS1	6	3	21	9	19	20	14	7	18	6	12	2	12	3	16	14	13	11	17	10	7	13	25	7
ZSCAN20	854	848	991	513	765	845	848	722	666	753	867	547	767	743	802	755	656	752	733	879	1026	1094	1390	992
CSMD2	0	0	0	1	0	0	6	2	0	2	0	1	0	0	0	0	0	0	0	0	18	0	0	0
HMGB4	0	0	0	0	0	0	0	0	0	0	0	0	0	0	0	0	0	0	0	0	0	0	0	0
CSMD2-AS1	0	0	0	0	0	0	0	0	0	0	0	0	0	0	0	0	0	0	0	0	0	0	0	0
C1orf94	0	0	0	0	0	0	0	0	0	0	0	0	0	0	0	0	0	0	0	0	0	0	0	0
MIR552	0	0	0	0	0	0	0	0	0	0	0	0	0	0	0	0	0	0	0	0	0	0	0	0
GJB5	0	0	0	0	0	0	3	0	0	0	0	0	0	0	0	0	0	0	0	0	0	2	0	0
GJB4	0	0	0	0	0	0	0	0	0	0	0	0	0	0	0	0	0	0	0	0	0	0	2	0
GJB3	0	0	0	0	0	0	0	0	0	0	0	0	0	0	0	0	0	0	0	4	0	0	0	0
GJA4	0	0	0	0	0	0	0	0	0	0	6	0	0	0	0	0	0	0	0	0	0	0	0	0
SMIM12	2490	1995	2518	1590	2268	2294	2115	1837	1804	2058	2166	1482	2380	1664	2012	1637	1967	1683	1708	1919	2910	2741	3172	2714
DLGAP3	64	48	52	56	43	39	45	10	27	30	81	27	21	93	12	36	13	43	37	20	66	38	54	52
GPR199P	8	11	14	5	8	10	12	8	12	16	16	6	9	13	10	8	18	9	6	8	19	13	26	16
TMEM35B	351	264	377	258	280	247	243	243	290	194	292	188	348	175	285	266	321	264	259	315	407	392	398	322
ZMYM6	1286	1151	1651	983	1179	1356	1212	1063	938	1323	1675	1026	1447	1070	1517	1166	1227	1126	988	1414	2240	2000	2224	1619
ZMYM1	2453	2305	2673	1717	2265	2249	2500	2021	1994	2215	2545	1753	2565	1834	2544	1887	2138	1886	1580	2634	3609	3511	3878	2876
SFPQ	44314	38720	51206	29773	40978	40453	42590	34695	32009	35590	40287	29971	45091	34690	41896	32228	38641	36243	34391	37585	56936	55603	66579	51243
ZMYM4	9542	8358	11408	6028	8123	8290	8947	7698	6735	7556	8360	6099	9073	7511	8832	7119	7520	7059	6721	8810	13107	12384	14370	10586
KIAA0319L	3531	2879	3629	2307	2996	3076	2951	2422	2362	2536	2673	2070	2946	2217	2505	2157	2536	2378	2335	2405	3724	3521	4279	3249
NCDN	4628	4182	5223	3164	4588	4758	4545	3929	3996	4021	4311	2964	4899	3763	4865	3166	4089	3992	3835	3889	5311	5210	5976	4985
TFAP2E	14	16	32	22	9	4	16	9	11	5	24	10	23	23	15	7	15	22	15	24	15	19	17	7
PSMB2	11695	10675	14270	8304	10838	10856	11171	9704	9202	9496	11234	7979	12140	8763	11458	8500	10835	9273	9511	10743	15635	14249	17625	12883
C1orf216	660	565	693	493	708	652	643	628	615	620	582	523	702	472	639	498	507	515	500	549	816	783	970	675
CLSPN	6459	5915	7295	4077	6389	6259	6054	4730	4934	5807	6035	4663	6286	4900	6236	4309	4910	5268	4789	6069	10433	9885	11978	9043
AGO4	1003	824	1234	839	847	977	999	914	673	800	891	745	971	725	984	688	674	696	735	864	1371	1364	1636	1104
AGO1	3532	3099	4092	2456	3627	3942	3582	3048	2475	2920	3114	2284	3687	2727	3510	2537	2667	2978	2730	3019	4338	4173	4845	3798
AGO3	2147	1969	2920	1578	2072	2173	2089	1937	1787	1895	1890	1703	2285	1783	2284	1623	2022	1812	1754	2690	3342	3076	3532	2630
TEKT2	14	4	12	20	20	5	12	22	21	11	16	2	11	19	25	7	16	6	14	2	9	14	33	2
ADPRS	1832	1458	1816	1258	1544	1765	1696	1412	1500	1526	1410	1164	2039	1299	1647	1207	1651	1529	1397	1598	2059	2100	2462	2022
COL8A2	0	0	0	2	8	0	0	0	2	0	6	1	0	4	2	10	0	2	0	0	3	4	4	2
TRAPPC3	2965	2421	3545	1929	2606	2705	2699	2337	2298	2194	2420	2116	2849	2069	2738	1883	2605	2316	2217	2631	3589	3538	4267	3172
MAP7D1	5676	5175	6769	3829	5394	5651	5671	4823	4645	4510	5188	3909	6174	4743	5455	3974	4919	4973	5083	4559	6098	6062	7579	5892
THRAP3	13012	11353	15194	8642	12103	11764	12397	10353	9662	10917	11453	8751	12495	9902	11960	9147	10160	10261	9492	12417	18470	18225	21209	15953
SH3D21	86	83	127	92	83	54	78	42	51	79	106	73	85	35	76	59	61	94	59	81	145	129	138	70
EVA1B	194	185	235	148	166	166	229	154	182	190	159	102	196	143	183	138	227	167	186	155	208	240	303	204
STK40	4208	3821	4921	2845	4100	4275	4033	3453	3272	3512	4071	2889	4448	3622	4243	3030	3790	3558	3567	3502	4913	4715	5864	4622
LSM10	2177	1790	2245	1365	1975	1749	2136	1586	1691	1578	2044	1404	2147	1487	2011	1529	1913	1570	1688	1677	2422	2411	2594	2221
OSCP1	186	200	309	182	250	173	191	125	189	143	150	141	145	171	160	120	222	177	149	145	239	289	292	141
MRPS15	4612	3723	5267	2884	3791	3908	4011	3432	3755	3251	3723	2683	4273	3401	3993	3105	3874	3063	3189	3651	5700	5607	6601	4859
CSF3R	0	0	0	0	0	0	0	0	0	0	0	0	0	0	0	0	0	0	0	0	0	0	0	0
GRIK3	8	16	18	6	0	10	12	0	4	16	0	3	0	0	2	2	0	4	16	0	4	6	24	6
MIR4255	0	0	0	0	0	0	0	0	0	0	0	0	0	0	0	0	0	0	0	0	0	0	0	0
LITATS1	20	32	6	4	11	30	24	14	18	2	18	0	38	18	55	12	6	12	4	14	26	20	30	16
ZC3H12A	144	157	192	141	153	170	174	100	130	203	167	91	177	197	233	174	175	183	156	42	193	230	215	158
MIR6732	0	0	0	1	0	0	0	1	0	0	0	0	0	0	0	0	0	0	0	0	0	0	0	0
MEAF6	3337	2917	3736	2202	3143	3054	3182	2536	2386	2891	2850	2143	3063	2390	3043	2322	3027	2513	2418	2678	4015	4042	4970	3638
MIR5581	16	4	18	3	13	7	7	5	2	8	7	13	15	7	10	3	9	2	1	12	13	5	4	15
SNIP1	1492	1150	1400	847	1163	1263	1227	1068	831	1136	1549	957	1267	914	1255	866	1150	1093	1024	1624	1727	1846	2172	1732
DNALI1	0	4	1	4	16	2	1	6	7	16	0	6	0	3	0	1	3	1	0	0	12	4	9	10
GNL2	6508	5535	7225	4242	5311	5780	5685	4654	4789	5023	5574	4082	5695	4781	5658	4326	5157	4772	4518	5909	7535	7844	8943	7343
RSPO1	0	0	6	0	0	0	2	0	4	10	0	0	0	0	0	0	0	8	0	0	2	8	2	2
AIRIM	3602	2904	3834	2024	2999	2862	3212	2611	2308	2828	2933	2233	3077	2617	2924	2397	2756	2512	2594	2727	4205	4145	4970	3922
CDCA8	5239	4661	5791	3386	4323	4871	5045	4056	3885	4260	4842	3336	4828	3897	4715	3778	4718	4127	3770	5169	6519	6133	7460	5944
EPHA10	74	47	84	72	86	94	60	65	76	109	137	42	119	48	91	58	86	30	64	83	87	86	89	77
MANEAL	2905	2431	3399	1925	2293	2591	2851	2250	2280	2414	2544	1853	2565	2293	2693	2081	2389	2232	2214	2330	3087	3003	3297	2802
YRDC	2088	1902	2532	1273	1749	1777	1772	1487	1605	1646	2045	1406	2211	1551	1838	1555	1882	1488	1518	1892	2443	2274	2906	1999
C1orf122	1230	1264	1591	939	1093	1291	1289	1216	1089	1015	1244	817	1538	1145	1371	986	1386	1043	1196	1124	1274	1235	1505	1204
MTF1	1400	1419	1672	850	1339	1381	1458	1196	970	1190	1252	954	1362	1181	1393	1048	1148	1114	1073	1103	1745	1845	2135	1691
INPP5B	1364	1389	1643	975	1268	1176	1159	1095	890	1062	1191	978	1243	1115	1268	1084	1218	1008	977	1231	1750	1834	2005	1597
SF3A3	11094	9906	12615	7103	9597	10008	10089	8164	8049	8643	9683	7419	10647	8277	9855	8132	9060	8559	7654	10122	14788	14808	16640	12696
FHL3	572	583	746	410	674	601	514	457	567	452	614	403	676	523	659	387	405	534	476	701	785	768	961	660
UTP11	3948	3331	4354	2537	3660	3364	3348	3082	2757	3047	3483	2426	3559	2640	3301	2393	3175	2684	2770	3310	5124	5008	5934	4376
POU3F1	129	89	102	54	61	69	93	90	56	66	87	39	112	67	94	73	61	62	42	24	136	68	124	113
MIR3659	0	0	0	0	0	0	0	0	0	0	0	0	0	0	0	0	0	0	0	0	0	0	0	1
LINC01343	0	0	0	0	6	0	2	0	0	0	0	0	0	0	4	0	0	0	0	0	0	0	0	0
RRAGC	2234	1723	2669	1364	1671	1789	1861	1567	1530	1710	1904	1367	2013	1677	1892	1483	1742	1453	1506	2160	2721	2440	2943	2158
GJA9-MYCBP	2	11	0	0	0	4	4	4	0	2	0	0	0	0	6	0	6	0	3	0	0	0	2	0
MYCBP	6	0	5	3	4	6	6	1	0	7	0	2	0	1	5	1	1	8	2	0	0	0	3	3
GJA9	0	0	0	0	0	0	0	0	0	0	0	0	0	0	0	0	0	0	0	0	0	0	0	0
RHBDL2	19	8	7	6	18	12	9	8	3	14	1	0	10	6	3	17	2	6	14	24	6	8	30	19
AKIRIN1	7958	6501	9432	5206	7381	6940	7471	6006	5754	5954	7268	5169	8063	6386	7016	5502	6924	5939	5495	7150	9383	9006	11038	8688
NDUFS5	7523	6726	9849	5150	7053	7509	7523	5986	6080	5962	6925	5046	7996	5651	7174	5374	7009	6284	6270	7599	9255	10213	11354	8974
MACF1	9077	8693	11050	6298	9337	9026	9826	8156	6761	8680	7844	5953	8541	6916	8871	6852	7211	7274	7338	10514	11842	11308	12732	9980
	1721	1494	1915	1164	1660	1837	1836	1559	1106	1457	1240	1280	1597	1420	1637	1238	1041	1420	1522	2222	2148	1819	2099	1742
	0	0	0	0	0	0	0	0	0	1	0	0	0	0	0	0	0	0	0	0	0	0	0	2
BMP8A	193	110	169	95	76	145	127	133	100	115	201	92	149	104	168	86	109	134	98	71	186	213	256	124
PPIEL	78	84	139	111	112	144	81	99	102	137	153	81	126	121	97	61	103	88	84	72	176	213	144	107
PABPC4	14229	12407	15569	9206	12505	12917	13072	10999	10205	10716	12071	8970	13171	10967	13190	9312	11719	10754	9915	12132	15454	15473	19071	14543
PABPC4-AS1	2	6	16	0	0	14	11	18	2	2	4	17	5	5	7	8	6	13	6	0	9	27	17	11
SNORA55	21	12	16	12	0	22	36	26	9	24	26	20	7	11	15	14	6	11	27	0	27	12	20	17
HEYL	534	441	563	295	505	426	539	446	486	432	534	359	547	320	508	329	428	360	446	427	656	515	649	524
NT5C1A	83	56	72	36	92	77	93	61	92	57	105	50	72	69	53	50	85	67	45	28	93	37	94	89
HPCAL4	416	372	599	332	348	434	404	349	291	339	470	220	486	303	326	372	393	379	379	498	597	508	533	448
PPIE	3030	2589	3389	1908	2645	2721	2852	2173	2267	2330	2621	2023	2956	2392	2849	2045	2935	2321	2468	2933	4112	3919	4507	3750
BMP8B	427	377	521	304	390	402	432	253	363	279	397	296	389	343	393	250	266	306	292	440	477	457	578	363
OXCT2	19	38	30	17	30	46	5	27	27	30	20	12	2	20	21	15	11	16	30	0	27	34	40	12
	26	12	6	7	3	8	4	7	6	7	2	4	2	0	17	11	8	4	0	0	7	5	8	16
LOC101929536	4	14	6	5	0	25	20	12	23	2	3	2	12	10	2	2	2	7	9	2	10	12	3	3
TRIT1	1357	1115	1654	828	1038	1180	1028	928	950	1028	1014	815	1266	938	995	883	1019	896	882	1036	1560	1521	1694	1468
MYCL	347	393	424	259	387	365	396	312	263	259	336	285	315	266	328	285	317	280	297	294	415	359	515	424
MFSD2A	236	182	360	149	196	187	312	270	245	336	310	214	306	228	315	229	292	327	229	382	373	372	419	263
CAP1	12978	11668	14316	8477	11350	11667	12003	10074	9614	10071	11910	8922	12628	9993	11971	9491	10755	9562	9608	12610	16853	16503	19191	15153
PPT1	9323	8171	10412	5967	8087	8135	7530	6567	6576	6933	7724	5902	8132	6237	8138	5854	7301	6473	5962	8118	10668	10281	12180	9109
RLF	3061	2586	3238	2028	2948	2797	2826	2345	2218	2451	3052	2210	2824	2367	2821	2422	2212	2332	2069	3326	4279	3907	4735	3678
TMCO2	0	0	0	0	0	0	0	0	1	0	0	0	0	0	0	0	0	0	0	0	0	0	0	0
ZMPSTE24	8129	7018	9755	5504	7523	7164	7880	6257	6076	6526	7231	5623	7967	6238	7783	5812	7142	6000	5620	8006	10927	11216	12970	9652
COL9A2	61	101	89	73	59	64	73	78	80	48	75	98	87	69	42	41	56	58	80	155	109	100	99	65
SMAP2	2897	2547	3157	1712	2461	2431	2624	2220	2032	1833	2404	1764	2689	2224	2900	1889	2284	2127	2137	2594	3495	3438	4099	3238
ZFP69B	227	150	219	132	155	205	163	232	170	205	157	135	173	119	186	122	160	144	148	186	375	280	304	246
ZFP69	543	430	446	265	465	369	448	378	354	411	451	358	496	465	572	252	373	391	302	437	652	591	777	497
EXO5	429	364	542	304	303	440	388	369	303	406	400	216	466	344	406	337	472	389	311	327	576	607	777	424
ZNF684	238	239	323	188	192	166	179	177	213	245	143	170	211	174	212	137	161	213	195	299	408	334	289	292
RIMS3	655	668	800	475	684	579	717	516	608	470	610	411	791	505	605	438	564	552	495	676	785	756	884	697
NFYC-AS1	98	103	85	80	46	74	68	129	88	112	126	64	64	67	92	46	74	64	38	108	169	195	109	80
NFYC	3515	3086	3941	2362	3044	3372	3074	2853	2441	2691	3142	2333	3223	2753	3644	2609	2756	2758	2849	2841	3988	4354	5011	3671
MIR30E	0	0	0	0	0	0	0	0	0	0	0	0	0	0	0	0	0	0	0	0	0	0	0	0
MIR30C1	0	0	0	0	0	0	0	0	0	0	0	0	0	0	0	0	0	0	0	0	0	0	0	0
KCNQ4	153	169	218	131	129	157	168	111	103	94	110	118	107	121	134	103	88	108	125	122	197	236	205	121
CITED4	53	73	88	63	81	44	53	30	36	48	47	17	46	37	52	32	76	45	48	66	73	64	59	56
CTPS1	11463	10635	13595	8013	9879	10630	10452	9405	8850	9397	10170	7067	10671	8728	10371	7671	9855	8135	7574	9545	15588	14777	16566	11674
SLFNL1-AS1	50	40	96	32	29	73	58	42	59	54	44	45	46	31	71	42	27	59	32	12	82	88	77	43
SLFNL1	40	32	28	37	38	36	12	29	38	60	23	20	46	19	34	31	45	31	32	0	74	74	40	23
SCMH1	2038	2047	2520	1407	1955	2105	2140	1789	1774	1913	1857	1502	2150	1759	2197	1534	1860	1752	1694	1702	2806	2642	2963	2257
FOXO6	284	203	300	149	232	209	254	162	205	215	269	188	182	168	287	155	166	247	218	261	297	201	275	210
EDN2	0	0	0	2	0	0	0	0	0	0	0	0	0	0	0	4	0	0	0	0	0	0	0	0
HIVEP3	393	418	503	243	514	476	393	281	324	306	393	255	487	306	434	278	392	344	269	256	402	483	508	343
GUCA2B	0	0	0	0	0	0	0	0	0	0	0	0	0	0	0	0	0	0	0	0	0	0	0	0
GUCA2A	2	0	4	0	0	0	0	0	0	0	2	0	0	0	0	0	0	0	0	0	0	0	0	0
FOXJ3	4254	3400	4771	2675	3670	3919	3634	3140	2656	3610	3651	2643	4230	2965	3737	2868	3026	3010	2793	3809	5374	5440	5937	4850
RIMKLA	731	623	872	371	459	589	733	504	510	634	620	414	771	522	686	475	427	483	421	611	758	849	1012	819
ZMYND12	0	1	0	2	2	0	0	0	0	0	0	0	8	0	0	4	0	2	0	0	8	2	4	2
PPCS	681	716	865	488	678	812	676	606	612	558	733	593	745	564	838	552	669	588	582	664	949	948	1092	821
CCDC30	29	27	10	18	41	19	49	31	20	38	15	9	57	28	22	39	34	37	39	21	57	83	59	58
PPIH	2612	2178	3335	1658	2612	2440	2661	1951	2124	2081	2473	1992	2797	1872	2303	2018	2466	2150	2063	2482	3161	3111	3851	2884
YBX1	62974	54328	72315	42108	55811	58157	58871	47799	47792	47548	54547	41468	61979	48812	57606	42293	53802	51231	50522	52473	72682	70591	86652	66796
CLDN19	4	0	8	0	0	0	0	0	0	4	0	0	0	0	2	0	0	4	0	0	0	0	0	4
P3H1	4090	3501	4445	2656	3607	3766	3995	3124	3138	3116	3591	2802	4218	3120	3899	2858	3465	3578	3282	3443	4686	4584	5493	4464
C1orf50	382	335	441	262	379	358	411	367	317	294	432	312	454	298	479	275	472	255	325	318	504	530	661	471
TMEM269	4	14	13	16	15	5	11	16	9	20	2	0	7	12	21	4	16	13	27	10	44	23	9	5
SVBP	574	527	660	348	458	451	482	490	449	429	522	280	502	360	438	359	550	399	412	444	633	622	819	575
ERMAP	285	294	401	197	226	285	352	295	272	250	443	258	250	312	286	253	241	320	281	290	496	417	440	386
ZNF691	910	825	1005	621	921	938	891	674	779	670	969	631	988	729	900	662	838	803	725	889	1429	1284	1436	1026
LOC339539	0	0	2	4	0	0	1	1	0	0	0	0	0	0	2	0	1	0	0	0	7	0	0	1
SLC2A1	3433	2877	3720	2318	2901	3094	3193	2779	2496	3018	3000	2293	3581	2684	3036	2329	2669	2892	2868	2909	3548	3721	4239	3529
SLC2A1-DT	14	25	11	6	3	27	19	18	24	23	4	8	24	8	22	10	6	9	8	24	29	10	9	35
	15	0	4	2	13	0	4	10	6	1	0	6	0	12	10	0	2	2	0	14	22	3	0	0
CFAP144	8	12	21	21	38	6	16	14	1	2	6	10	26	32	20	9	6	15	23	4	36	23	28	20
EBNA1BP2	7268	6541	8485	4900	6480	6954	6713	5711	5693	5931	6632	4975	7689	5683	6678	5669	6799	5981	5449	6789	9540	9076	11024	8368
MIR6733	4	2	2	1	0	1	2	4	0	0	1	1	0	0	0	2	0	0	0	0	1	5	3	0
CFAP57	44	13	8	8	20	10	16	37	12	6	14	2	17	6	32	18	0	16	12	0	12	28	37	6
TMEM125	0	0	0	0	0	0	0	0	0	0	0	0	0	0	1	0	0	0	0	0	0	0	0	0
C1orf210	0	0	0	0	0	0	0	8	0	0	0	0	0	0	0	0	0	0	0	0	0	0	0	0
TIE1	5	0	0	0	0	0	0	0	0	4	0	0	0	0	0	0	0	0	0	1	0	0	0	0
MPL	4	2	7	0	6	0	16	0	2	0	0	4	8	4	8	1	2	0	4	22	18	9	22	8
CDC20	11549	10611	13963	8110	10794	11432	11541	9355	10034	9985	11120	8244	11890	10071	11944	9007	11419	10794	9916	10676	15311	14145	17375	13748
ELOVL1	3074	2528	3481	1938	2750	2683	2861	2339	2391	2597	2492	2025	3307	2322	2642	2046	2533	2321	2418	2380	3460	3380	4209	3245
MIR6734	0	0	0	0	0	0	0	0	2	0	0	0	0	0	0	0	0	0	0	0	0	0	0	0
MED8	1724	1680	2050	1204	1869	1651	1623	1445	1401	1562	1644	1297	1566	1613	1686	1327	1504	1496	1360	1715	2493	2360	3023	2246
SZT2	1286	1349	1897	1191	1312	1503	1476	1109	1307	1460	1442	941	1240	1243	1455	1093	1056	1326	1212	1519	2107	1873	1906	1437
MIR6735	0	0	0	0	0	0	0	0	0	0	0	0	0	0	0	0	0	0	0	0	0	0	0	0
HYI	1	4	6	10	2	8	9	4	15	4	0	0	0	7	20	3	0	2	0	0	30	12	2	2
PTPRF	16226	14552	17517	10095	13884	14431	14362	11604	10828	11642	12744	8528	13481	11049	12981	9654	11052	11277	11464	11832	14000	14097	16348	12749
KDM4A	6153	5260	6321	3901	5354	5582	5128	4834	4352	4408	4956	3875	5446	4630	5513	4075	5078	4694	4594	5558	7356	6840	8529	6531
KDM4A-AS1	75	53	95	45	73	80	61	42	48	52	50	61	84	41	65	43	43	88	57	37	75	79	124	138
ST3GAL3	324	263	427	160	310	300	296	297	257	204	338	228	325	359	378	239	267	194	222	344	443	393	469	356
ST3GAL3-AS1	2	0	0	0	0	4	0	2	2	0	2	2	0	2	7	0	8	0	1	0	0	0	2	3
MIR6079	6	0	0	0	0	0	0	0	0	0	0	0	0	0	0	0	0	0	0	0	0	0	0	0
ARTN	28	28	23	20	25	38	12	24	21	8	40	24	24	12	24	12	17	17	18	10	56	36	12	10
IPO13	3849	3431	4207	2418	3309	3550	3651	3076	2910	3304	3319	2493	3768	3034	3635	2685	3360	3020	2874	3259	4610	4044	4991	3973
DPH2	4862	4378	5565	3062	4333	4527	4893	3954	3798	4060	4021	3103	5129	4057	4505	3395	4054	4103	3905	4391	5601	5345	6575	5343
ATP6V0B	6440	5519	7346	4172	5921	6042	6000	5144	5173	5258	6030	4136	6436	4748	6186	4397	5977	5196	5301	4884	7215	7005	8497	6664
B4GALT2	4556	3824	5056	2858	4006	4247	4392	3559	3727	3689	3731	2883	4536	3549	4390	3258	3915	3669	3718	3626	4591	4731	5485	4351
CCDC24	125	99	173	48	68	173	105	93	79	83	95	78	65	81	56	66	126	64	54	112	118	109	132	96
SLC6A9	812	705	1000	554	599	871	850	605	660	678	731	551	981	588	730	600	809	739	782	552	883	964	1094	867
KLF17	0	0	0	0	0	0	0	0	0	0	0	0	0	0	0	0	0	2	0	0	0	0	0	0
KLF18	0	0	0	0	0	0	0	0	0	0	0	0	0	0	0	0	0	0	0	0	0	6	0	0
DMAP1	1816	1588	1979	1167	1684	1902	1758	1364	1292	1372	1643	1254	1731	1396	1715	1372	1545	1370	1381	1394	2058	2048	2469	1736
ERI3	4568	3835	4703	3136	3976	3890	4311	3423	3429	3382	4152	2885	4649	3527	4072	3211	3861	3442	3553	3813	4926	5006	6272	4830
ERI3-IT1	29	3	14	20	22	25	8	9	15	18	2	19	9	13	26	25	13	16	21	10	26	45	35	13
RNF220	4665	4158	5278	2865	4241	4365	4542	3717	3751	3618	4189	2768	4597	3344	4425	3333	4133	3662	3537	4298	5313	5406	6764	4897
MIR5584	0	0	0	0	0	0	0	0	0	0	0	0	0	0	0	0	0	0	0	0	0	0	0	0
TMEM53	146	140	238	124	158	224	209	167	131	136	197	104	169	137	226	108	167	169	159	134	177	245	200	142
ARMH1	0	0	5	6	1	4	6	4	1	0	4	6	6	11	10	2	8	9	2	0	8	0	6	2
RNU5F-1	0	0	0	0	3	0	0	0	0	7	0	0	0	0	0	0	0	0	0	0	0	0	0	0
RNU5D-1	0	0	0	0	0	0	3	0	0	0	0	0	0	0	0	0	0	7	0	0	0	0	3	1
KIF2C	4860	4264	5606	2996	4121	4163	4388	3550	3774	3751	4290	3027	4689	3872	4432	3250	4218	3709	3460	4708	5903	5848	6884	4991
RPS8	66723	57443	77081	44931	58581	60960	62553	52181	52063	51054	58031	43168	66473	50154	62883	47436	59632	50473	50890	55702	85377	81459	102198	78279
SNORD55	169	122	142	66	98	107	121	103	101	72	100	61	130	95	108	103	93	109	117	46	123	132	113	114
SNORD46	35	26	10	22	23	15	20	17	12	15	18	22	16	15	14	17	16	11	8	10	19	22	29	10
SNORD38A	21	2	7	2	8	7	17	12	7	23	10	4	17	25	10	5	11	8	4	10	4	13	14	8
SNORD38B	27	63	70	30	37	52	35	39	52	26	25	13	38	23	48	25	55	48	33	40	50	57	58	44
BEST4	6	2	4	4	0	0	1	5	4	0	14	0	0	0	3	4	5	2	0	16	14	0	2	5
PLK3	70	123	135	98	82	83	109	104	108	81	110	82	117	57	73	69	101	69	86	61	173	134	148	72
DYNLT4	0	0	0	2	0	0	0	0	0	0	0	0	0	2	0	0	0	0	1	0	0	0	4	0
BTBD19	9	7	18	3	1	2	0	7	2	2	18	10	14	4	2	0	2	3	8	0	4	3	6	4
PTCH2	75	53	110	66	98	86	105	53	82	67	56	69	62	127	42	62	44	46	88	37	112	92	87	47
EIF2B3	3544	2874	3910	2330	2976	3083	3114	2529	2819	2846	3143	2225	3308	2691	3055	2628	2983	2511	2491	3251	4544	4219	4778	3781
HECTD3	2908	2307	3095	1971	2908	2604	2564	2203	2204	2002	2264	1977	3026	2168	2557	1900	2562	2343	2262	2395	3117	3021	3846	2986
UROD	4000	3548	4798	2442	3333	3704	3589	3162	3467	3203	3653	2491	4013	3088	3987	2755	3670	2971	3056	3266	4932	4210	5256	4285
ZSWIM5	1058	989	1327	791	1078	1030	1121	928	811	768	927	897	957	799	1094	716	808	871	860	1040	1195	1359	1471	1154
LINC01144	25	20	17	25	14	26	33	20	4	10	18	2	25	21	6	4	26	8	16	22	28	24	18	10
HPDL	1	1	1	8	10	6	4	2	2	2	4	0	8	10	0	8	0	6	4	0	3	4	0	3
MUTYH	627	565	842	492	694	643	513	500	520	438	590	407	661	468	574	394	677	466	426	336	867	806	929	604
TOE1	1390	1336	1874	1026	1340	1359	1381	1171	1302	1230	1264	950	1628	1238	1496	1086	1182	1196	1176	1231	1931	1856	2297	1666
TESK2	412	381	640	270	382	400	374	336	238	276	264	241	391	274	310	273	261	302	239	219	490	419	548	447
CCDC163	271	290	278	159	282	261	340	202	318	267	341	198	408	263	324	260	408	321	291	346	487	515	510	453
MMACHC	1795	1551	2071	1170	1538	1621	1659	1368	1405	1495	1648	1162	1762	1390	1696	1418	1800	1490	1404	1691	2460	2302	2744	2008
PRDX1	34470	29147	38452	20823	29549	30138	30056	25369	25775	25986	30089	22785	34040	25527	31212	24067	30540	25985	24330	30761	44804	42990	51592	39596
AKR1A1	2485	2168	2903	1719	1972	2165	2254	1763	1886	1976	2498	1698	2272	1906	2342	1658	2536	1867	2027	2102	2964	3176	3628	2623
NASP	13859	11793	16114	9722	12602	13355	12861	10373	10677	10945	12395	8765	12937	10273	12854	9552	11457	10400	10306	12689	18825	18819	20695	15586
CCDC17	4	6	25	16	18	16	26	23	34	13	0	8	6	30	11	5	4	7	19	50	56	41	21	21
GPBP1L1	4900	4209	5629	3335	4804	4480	4424	3911	3221	3868	4402	3394	4617	3896	4449	3664	4066	3513	3524	4612	6924	6931	7917	5702
RPS15AP10	12	10	11	0	0	4	5	16	4	0	4	2	0	8	0	3	2	5	0	12	6	4	6	2
TMEM69	1206	1080	1491	810	1135	1053	1092	861	940	925	1155	820	1370	1010	1106	910	1118	894	928	1076	1714	1577	1910	1381
IPP	783	787	817	490	701	665	653	552	525	569	730	392	728	665	699	635	610	637	537	812	975	907	1004	771
MAST2	3446	2683	3767	2254	2969	3345	3269	2571	2673	2668	2932	2332	3533	2530	2995	2262	2659	2791	2687	2809	3756	3781	4455	3372
PIK3R3	4432	3603	5139	2979	4316	4351	4142	3375	3149	3492	4080	3102	4563	3298	3899	2957	3604	3284	3305	3791	5477	5563	6426	5032
LOC101929626	0	2	0	0	0	0	2	3	0	2	0	5	4	1	0	0	0	0	0	0	0	0	2	4
TSPAN1	0	11	4	0	0	0	9	6	2	6	8	0	5	6	0	2	3	11	0	0	13	0	10	7
POMGNT1	2394	2518	3224	1718	2608	2370	2688	2220	2123	2066	2292	1637	2549	2012	2656	1977	2343	1997	1953	1962	3207	2954	3479	2597
LURAP1	42	39	33	36	24	14	28	24	21	21	25	10	29	37	34	19	16	27	34	33	71	51	49	43
RAD54L	4114	3580	4741	2911	3543	4009	3910	3363	3261	3699	4017	2876	4111	3243	4227	2934	3723	3369	3208	3744	5414	5321	5814	4224
LRRC41	6341	5415	6991	4057	5715	6040	6207	4843	5242	4855	5689	4100	6946	5033	6562	4562	5470	5524	4937	5373	7725	6911	9160	6403
UQCRH	6523	5163	7152	4288	5222	5995	5859	4876	5071	4799	5661	3921	5902	4140	5823	4516	5339	4699	4736	5530	7631	7419	9496	7165
NSUN4	2001	1836	2399	1273	1683	2044	1950	1725	1634	1832	1767	1491	1813	1573	1762	1403	1841	1565	1748	1865	2700	2605	3009	2222
FAAH	128	135	122	86	95	172	106	98	124	92	159	72	90	98	95	113	173	111	90	157	189	169	123	129
FAAHP1	29	18	21	18	52	38	39	20	30	37	53	18	50	15	12	22	15	32	16	51	64	36	42	31
LINC01398	0	1	12	0	0	2	4	3	4	0	0	0	10	1	3	1	0	2	5	0	7	4	10	2
DMBX1	227	242	207	202	262	219	196	239	188	287	234	140	225	227	246	210	250	196	190	252	399	211	317	242
MKNK1-AS1	18	20	3	14	0	12	3	15	7	10	4	14	0	9	1	7	4	12	15	0	24	15	19	4
KNCN	0	0	1	0	0	0	0	0	0	0	0	0	0	0	0	0	0	0	0	0	0	0	0	0
MKNK1	1230	1098	1301	685	1029	1011	1064	843	836	966	982	844	1124	868	1042	796	944	856	808	975	1439	1354	1723	1356
MOB3C	64	42	90	60	20	73	42	56	60	77	22	39	120	66	74	75	58	84	38	47	104	92	135	75
ATPAF1	6369	5176	7271	4208	6148	5567	6038	4842	4719	5002	5607	4302	6511	4700	5592	4572	5691	4998	4816	5715	8114	7989	9468	6947
TEX38	0	0	0	2	0	0	0	0	2	0	1	0	0	1	0	0	0	0	0	0	0	0	0	0
EFCAB14-AS1	2	3	2	0	8	1	1	1	0	12	2	0	0	3	0	1	0	0	0	0	0	3	2	1
EFCAB14	3160	2654	3437	1827	2611	2615	2664	2378	1999	2414	2749	2069	2959	2333	2812	2139	2596	2306	2295	3223	4042	3960	4596	3243
CYP4B1	0	0	0	0	0	0	0	0	0	0	0	0	0	0	0	0	0	0	0	0	0	0	0	0
CYP4Z2P	0	0	0	0	0	0	0	0	0	0	0	0	0	0	0	0	0	0	0	0	0	0	0	0
CYP4A11	0	0	0	0	0	0	0	0	0	0	0	0	0	0	0	0	0	0	0	0	0	0	0	4
CYP4X1	34	53	45	56	55	58	44	40	47	93	57	79	66	60	57	26	54	47	47	54	94	100	122	82
CYP4Z1	0	0	0	2	0	8	0	0	0	0	0	0	0	2	0	0	3	0	0	0	0	1	5	2
CYP4A22	0	0	6	2	0	0	0	0	0	0	0	0	0	0	0	0	0	0	0	0	0	0	0	4
LINC00853	0	4	5	6	6	2	4	4	1	9	3	0	5	2	0	4	0	2	2	0	18	14	2	2
PDZK1IP1	0	0	0	0	0	0	0	0	0	0	0	0	0	0	0	0	4	0	0	0	0	0	0	0
TAL1	76	97	106	61	62	75	64	71	85	96	58	66	93	59	122	76	77	30	42	107	94	75	127	100
STIL	3628	3476	4479	2504	3409	3498	3461	3021	2595	3056	3562	2682	4115	3046	3700	2644	2959	2831	2909	3487	5427	5239	5757	4240
CMPK1	4735	3927	5202	2993	4294	4125	4271	3620	2958	3613	4111	3097	4606	3416	4081	3244	4283	3402	3386	4521	6343	5855	7121	5425
LINC01389	8	0	1	12	7	12	6	8	12	17	3	4	18	0	5	6	16	7	3	52	10	31	13	10
FOXE3	0	2	26	0	0	6	13	0	0	4	2	0	5	7	0	0	13	2	3	0	0	2	6	4
FOXD2-AS1	385	383	428	260	353	326	358	260	298	317	373	211	448	264	366	207	416	322	274	306	401	361	446	366
FOXD2	497	420	657	433	368	589	574	440	373	374	550	247	517	311	417	404	439	379	432	402	412	542	527	460
TRABD2B	155	178	294	127	168	170	187	137	69	226	148	173	222	100	248	120	113	203	151	149	197	244	217	165
SKINT1L	0	0	0	0	0	0	0	0	0	0	0	0	0	0	0	0	0	0	0	0	0	0	0	0
SLC5A9	2	0	0	2	0	9	0	2	4	0	4	1	6	0	0	2	1	0	2	0	4	0	1	0
SPATA6	236	208	280	190	236	317	282	182	143	266	198	194	229	252	170	171	222	241	235	213	312	334	471	306
AGBL4	19	11	4	2	4	4	10	4	1	0	4	12	12	14	5	10	6	8	4	11	6	21	22	18
BEND5	30	14	46	24	33	21	8	26	35	18	25	4	12	16	22	12	18	25	14	26	17	24	10	22
AGBL4-AS1	0	0	0	0	0	0	0	0	0	0	0	0	0	0	0	0	0	0	0	0	0	0	4	0
AGBL4-IT1	0	0	0	0	0	0	0	0	0	0	0	0	0	0	0	0	0	0	0	0	0	0	0	0
ELAVL4	0	4	10	2	0	4	18	0	0	2	0	0	8	4	10	2	0	6	2	6	0	10	0	2
DMRTA2	88	72	65	45	96	63	98	55	112	56	26	34	88	46	74	48	87	65	49	100	99	110	113	76
FAF1	4516	4212	5594	3274	4302	4344	4313	3621	3830	3669	4479	2946	4077	3477	4413	3395	4338	3513	3710	4502	5825	5630	6253	4964
CDKN2C	4881	4170	4925	2899	3813	4401	4094	3645	3303	3837	3828	3207	4560	3498	4213	3272	4107	3654	3641	4005	4882	4727	6340	4724
MIR4421	0	0	0	0	0	0	0	0	0	0	0	0	0	0	0	0	0	0	0	0	0	0	0	5
MIR6500	0	0	0	0	0	0	0	0	0	0	0	0	0	0	0	0	0	0	0	0	0	0	0	5
C1orf185	0	0	0	0	0	6	0	0	0	0	0	0	0	0	0	0	0	0	0	0	0	0	0	0
RNF11	2723	2430	3438	1793	2513	2640	2544	2095	2063	2346	2470	1880	2578	2067	2507	2056	2166	2104	1988	2519	3518	3354	4325	3221
TTC39A	251	220	314	147	288	178	226	227	221	285	213	136	296	260	264	194	230	246	141	184	290	247	287	221
TTC39A-AS1	0	5	0	0	0	0	0	0	0	0	0	0	0	0	0	2	0	0	0	0	0	0	0	0
EPS15	3841	3206	4587	2515	3465	3537	3614	3045	2870	3134	3341	2540	3762	3012	3654	2666	3236	2889	2826	3789	5628	5640	6614	5052
OSBPL9	4914	4170	5579	3343	4441	4323	4168	3454	3546	3894	4318	2905	4639	3381	4121	3351	3812	3558	3341	3837	6135	5881	6612	5382
NRDC	10800	9543	12491	7242	10263	10012	10228	8412	8316	8440	10092	7174	10501	8280	10053	7834	9244	8001	8147	10197	14052	14015	15662	12501
MIR761	0	0	0	0	0	0	0	0	0	0	0	0	0	0	0	0	0	0	0	0	0	0	0	0
RAB3B	611	541	661	321	584	517	531	416	369	480	468	445	631	364	552	356	433	437	446	509	758	693	784	600
TXNDC12	4143	3582	4293	2280	3348	2975	3190	2578	2471	2631	3217	2100	3407	2440	2964	2286	2823	2586	2339	3132	4431	4181	4855	3800
KTI12	0	0	0	0	0	0	0	0	0	0	0	0	0	0	0	0	0	0	0	0	0	0	0	0
TXNDC12-AS1	0	0	0	0	0	2	0	4	0	0	11	1	0	0	6	0	0	3	0	0	14	0	0	2
BTF3L4	2929	2649	3840	2020	2928	2782	2836	2159	1991	2398	2495	1978	2516	2187	2943	2091	2641	2241	2033	2657	3662	3629	4676	3342
ZFYVE9	2416	2087	2862	1597	2363	2421	2371	1906	1789	2023	2155	1760	2746	1926	2330	1721	1940	2037	1746	2521	3549	3181	3774	2733
CC2D1B	2137	2205	2794	1706	2512	2142	2163	1903	1880	2098	2283	1551	2466	1913	2470	1816	2213	1985	1930	1888	2912	2936	3302	2568
ORC1	3018	2736	3648	1888	2594	2871	3080	2379	2331	2464	2903	1857	2991	2496	3009	2180	2530	2332	2298	2800	3554	3832	4189	3276
PRPF38A	7436	6044	8891	4810	7183	7398	7111	5724	5420	6084	6672	4661	7299	5990	7089	5564	6548	6186	5783	7400	9761	9075	10936	8589
TUT4	4896	4095	5915	3320	4896	5087	4631	4148	3439	4414	4454	3374	4939	3768	4533	3496	3769	3727	3646	5228	7085	6913	7936	6140
	5	5	6	11	32	15	12	8	0	2	15	3	0	10	19	5	13	4	27	15	10	19	6	9
GPX7	2	0	0	0	0	0	2	6	0	0	0	0	0	0	0	0	0	0	2	0	0	0	0	0
SHISAL2A	0	0	0	0	0	0	6	0	0	0	0	0	0	2	0	0	0	0	0	0	0	0	0	0
COA7	3402	3005	3749	2098	2923	2937	3002	2721	2420	2446	2865	2194	3250	2410	2976	2389	2395	2324	2550	2850	3902	3699	4435	3394
ZYG11B	4975	3995	5575	3280	4927	4438	4669	3758	3310	4068	4408	3543	5049	3421	4585	3521	3909	3498	3516	4258	6200	6237	7347	6086
ZYG11A	1125	1021	1384	788	884	1137	976	937	773	968	1018	809	1127	854	995	825	1040	817	779	1029	1495	1491	1772	1402
ECHDC2	186	173	263	110	196	225	174	193	137	182	159	133	236	133	190	183	125	148	119	106	363	303	240	241
SCP2	3670	3270	4885	2854	3660	3560	3492	3021	2813	3327	3764	2616	3738	3145	3732	2885	3567	2884	2692	3669	4980	5016	5808	4409
	0	0	0	0	0	4	0	0	0	0	8	0	0	0	0	0	0	2	0	0	0	0	0	0
	0	0	0	0	0	0	0	0	0	0	0	0	0	0	0	0	0	0	0	0	0	0	0	0
	0	0	0	0	0	0	0	0	0	0	0	2	0	0	0	0	0	0	0	0	0	0	0	0
PODN	0	0	0	0	0	0	0	0	0	0	0	0	0	0	0	0	0	6	0	0	0	0	0	0
SLC1A7	0	6	0	0	0	0	0	0	0	0	0	0	0	0	0	0	0	0	0	0	0	0	0	0
CPT2	1910	1790	2076	1205	1589	1648	1759	1433	1467	1341	1830	1189	2251	1501	1702	1316	1388	1513	1450	1763	2228	2263	2469	1849
CZIB	1430	1261	1711	920	1125	1216	1146	1086	1065	965	1053	796	1141	962	1340	955	1363	958	1015	1013	1656	1603	1931	1434
MAGOH	2959	2431	3655	1830	2450	2531	2482	2151	2296	2210	2538	2053	2942	2295	2654	1961	2555	2240	2206	2739	3823	4081	4831	3557
MAGOH-DT	14	14	19	10	4	40	18	17	33	21	10	5	19	13	2	12	20	16	18	8	20	26	28	14
LRP8	1115	984	1366	722	1018	1118	1148	996	733	996	955	741	1062	814	1155	887	996	928	903	1172	1458	1523	1460	1235
SLC25A3P1	0	0	0	0	0	0	0	0	0	0	0	0	0	0	0	0	0	0	0	0	0	0	0	0
DMRTB1	0	0	0	0	0	0	0	0	0	0	0	0	0	0	0	0	0	0	0	0	0	0	0	0
GLIS1	25	42	29	9	62	37	35	34	28	12	15	24	27	34	23	12	6	36	31	41	40	24	54	26
	6	0	0	2	4	0	8	0	2	0	2	20	3	0	8	0	14	0	8	0	0	0	0	2
NDC1	11961	9962	13693	7169	9887	9771	9890	8027	7207	8789	9503	6809	10320	7747	9675	7445	9169	7571	7527	10304	13275	13154	14913	11167
YIPF1	1013	966	1199	616	852	959	1049	761	755	763	951	692	979	778	913	623	959	744	742	863	1296	1178	1492	1140
DIO1	12	0	0	1	0	0	0	0	4	0	8	0	0	0	14	0	2	2	2	0	4	1	13	0
IFT25	997	833	1073	727	890	941	1039	671	743	920	1007	700	807	842	908	772	866	745	789	756	1493	1383	1809	1331
LRRC42	2141	1926	2696	1376	1909	2004	2111	1722	1765	1690	1877	1435	2214	1585	1957	1488	1987	1603	1566	2208	2627	2768	3005	2522
LDLRAD1	0	0	0	0	0	0	0	0	0	0	0	0	0	0	0	0	0	0	0	0	0	0	0	0
TMEM59	4794	3533	5519	3127	4304	4034	4304	3422	3397	3525	3870	3173	4326	3396	4088	3235	3794	3454	3245	4481	5247	5717	5993	5244
TCEANC2	1636	1514	1935	1241	1542	1516	1668	1316	1342	1442	1487	960	1456	1308	1592	1127	1277	1299	1252	1411	1986	2027	2441	1838
MIR4781	0	0	0	0	0	0	0	0	0	0	0	0	0	0	0	0	0	0	0	0	0	0	0	0
CDCP2	5	0	16	4	6	6	1	6	13	0	0	0	0	0	4	0	12	2	0	0	8	4	4	2
CYB5RL	1214	1102	1385	758	1160	1188	1160	1030	909	1040	1051	769	1112	917	1115	821	899	958	951	1162	1646	1452	1868	1268
MRPL37	13545	11818	15161	8556	11292	12227	12833	10400	10542	10044	12132	8692	12965	10121	12186	9143	11568	10302	10165	11817	15188	14700	17220	13407
SSBP3	1213	1188	1838	876	1195	1455	1333	1097	1148	1121	1246	1000	1175	1080	1181	898	1332	1209	1055	863	1389	1425	1613	1317
SSBP3-AS1	22	10	38	10	4	32	8	18	6	28	24	22	7	40	19	33	24	9	17	24	38	22	29	33
ACOT11	37	57	150	32	55	58	61	48	60	29	78	26	118	38	66	36	19	51	46	32	61	39	64	54
FAM151A	0	0	14	0	8	2	4	2	5	1	1	0	5	2	0	2	2	0	2	19	2	0	1	0
MROH7	0	0	0	0	0	0	0	0	0	0	0	0	0	0	0	0	0	0	0	0	0	0	2	0
MROH7-TTC4	0	0	0	0	0	0	0	0	0	0	0	0	0	0	0	0	0	0	0	0	0	0	0	0
TTC4	56	59	50	37	42	38	51	36	45	38	38	32	74	41	49	48	32	39	30	23	33	55	66	50
PARS2	808	785	1184	593	941	944	936	851	900	799	823	592	1153	716	974	676	824	759	750	683	1258	1150	1456	981
TTC22	0	0	0	0	0	0	1	0	0	0	0	0	0	0	14	0	1	0	0	0	0	1	0	0
CIMAP2	0	11	0	0	0	0	0	0	0	4	0	0	0	0	0	0	0	0	6	0	0	0	4	0
DHCR24	25410	22598	30043	15991	22327	22871	24416	19918	18955	19736	23221	16307	25136	19630	23955	17231	20392	19617	19233	22103	28850	27061	31902	25382
	0	0	0	0	0	0	0	0	0	0	0	0	0	0	0	0	0	0	0	0	0	0	0	0
TMEM61	0	0	0	0	0	0	0	0	0	0	0	0	0	0	0	0	0	0	0	0	0	0	0	0
BSND	0	0	0	0	0	2	0	2	0	0	0	0	0	0	0	0	0	2	0	0	0	4	0	1
PCSK9	0	0	0	0	0	0	1	0	0	0	0	0	0	0	0	0	0	0	0	0	0	2	0	2
USP24	11476	10152	13848	7667	11029	11435	11626	9329	7846	10243	10311	7793	11764	8602	11089	8605	8532	8845	9063	12227	15638	14718	16964	13846
LOC100507634	46	59	54	50	56	52	36	57	29	37	44	23	64	68	53	40	40	29	30	24	63	70	56	19
MIR4422	0	0	0	0	0	0	0	0	0	0	0	0	0	0	0	0	0	0	0	0	0	0	0	0
PLPP3	1210	1124	1327	762	1174	1204	1116	868	874	937	1204	737	1233	973	1101	981	849	896	750	1023	1317	1362	1571	1303
PRKAA2	3863	3209	4214	2379	3349	3296	3535	2768	2435	3107	3300	2541	3950	2886	3640	2768	3060	2838	2743	3894	4828	4998	5635	4406
FYB2	0	14	0	1	0	13	1	0	1	0	0	1	4	8	0	0	0	7	1	0	0	7	0	2
C8A	0	0	0	0	0	0	0	0	0	0	0	0	0	0	0	0	0	0	0	0	0	0	0	0
C8B	0	0	0	0	0	0	0	0	0	0	0	0	0	0	0	0	0	0	0	0	0	0	0	0
DAB1	10	14	25	8	16	10	16	12	17	14	35	4	18	0	8	2	19	8	8	6	9	10	12	12
DAB1-AS1	0	0	0	0	0	0	0	0	0	0	0	0	0	0	0	0	0	0	0	0	0	0	0	0
OMA1	1950	1647	2079	1240	1627	1631	1632	1370	1439	1673	1599	1261	1803	1552	1876	1391	1844	1380	1462	1947	2871	2683	3292	2385
TACSTD2	0	0	0	0	0	0	0	0	0	0	0	0	0	0	0	0	0	0	0	0	0	0	2	0
MYSM1	3571	3204	4610	2618	3428	3331	3277	2912	2346	3295	3378	2333	3336	2911	3368	2494	2441	2555	2576	3604	5507	5714	5919	4205
JUN	15892	14608	18811	11275	15977	15625	16844	13308	13457	13703	16693	11446	17714	14270	17112	12575	16033	15099	14659	14223	18387	19306	24492	17549
JUN-DT	0	1	0	2	2	0	2	4	1	0	0	0	0	2	0	0	0	0	0	0	0	2	10	0
LINC01358	0	0	0	0	0	0	0	0	0	0	0	0	0	0	0	0	0	0	0	0	0	0	0	0
HSD52	0	0	0	0	0	0	0	0	0	0	0	0	0	0	0	0	0	0	0	0	0	0	0	0
FGGY	81	110	188	81	103	124	108	127	72	163	145	102	155	65	101	112	96	105	121	135	133	170	227	128
MIR4711	0	0	0	0	0	0	0	0	0	0	0	0	0	0	0	0	0	0	0	0	0	0	0	0
LOC101926944	0	0	0	0	0	1	0	0	0	0	0	0	0	0	0	0	0	0	0	0	0	0	0	0
HOOK1	3781	3086	3994	2291	3068	2908	3471	2730	2386	3240	3126	2591	4039	2815	3394	2717	3248	2627	2602	4132	5281	5042	6151	4309
CYP2J2	199	226	307	154	219	255	198	128	189	180	211	134	246	149	237	201	155	157	94	307	232	340	363	225
C1orf87	0	0	0	0	0	2	0	0	0	0	0	0	0	0	0	0	0	0	0	0	0	0	0	0
LOC101926964	0	0	4	2	0	0	0	0	0	0	0	0	0	2	0	0	0	0	0	0	0	6	0	0
NFIA-AS2	0	0	0	0	0	0	0	0	0	0	0	0	0	0	0	0	0	0	0	0	0	0	0	0
NFIA	1285	1084	1551	909	1159	1078	1205	952	971	1019	1136	904	1222	995	1348	1017	1013	1040	896	1258	2087	2091	2433	1828
NFIA-AS1	0	0	0	0	0	0	0	0	0	0	0	0	0	0	0	0	0	0	0	0	0	0	0	0
MGC34796	0	0	0	2	0	0	0	0	4	2	0	0	0	0	0	0	0	0	0	0	0	12	0	0
TM2D1	1055	890	1190	737	977	920	904	761	792	878	969	632	1028	713	841	646	942	746	642	870	1509	1499	1401	1148
PATJ	1415	1134	1604	831	1269	1338	1504	1108	972	1278	1270	939	1440	937	1354	993	1336	984	1215	1459	1782	1530	1934	1603
MIR3116-1	0	0	0	0	0	0	0	0	0	0	0	0	0	0	0	0	0	0	0	0	0	0	0	0
MIR3116-2	0	0	0	0	0	0	0	0	0	0	0	0	0	0	0	0	0	0	0	0	0	0	0	0
L1TD1	0	0	0	0	0	2	0	0	0	0	0	0	0	0	4	0	0	0	0	0	1	0	0	0
KANK4	0	6	0	4	0	6	6	4	0	0	0	2	2	0	24	0	0	6	0	0	0	6	8	4
USP1	12604	10412	14146	8015	11037	11142	11185	9444	8615	9880	10657	7812	11957	8661	11228	8479	10427	8807	8480	11827	15975	15966	18402	14310
DOCK7	5126	4892	6568	3389	4904	4654	5088	4395	3586	4358	4827	3394	5773	4424	4812	3879	4308	4143	3685	5527	7207	6873	7791	5882
ANGPTL3	4	0	0	0	0	6	3	4	0	0	0	0	3	1	0	0	0	0	1	0	0	4	18	3
ATG4C	2530	2051	2867	1590	1995	2263	2202	1816	1851	2209	2096	1650	2762	1978	2246	1934	2062	1776	1829	2078	3448	3301	3983	3001
LINC00466	0	0	0	0	0	6	0	0	0	6	0	5	0	0	0	0	0	2	2	0	0	0	0	2
FOXD3-AS1	104	95	156	64	66	82	60	75	78	119	81	80	132	73	92	63	87	76	64	39	116	99	145	122
FOXD3	201	112	162	85	133	116	154	99	122	113	110	113	124	137	151	122	95	122	138	72	109	163	160	169
MIR6068	0	0	0	0	0	0	0	0	0	0	0	0	0	0	0	0	0	0	0	0	0	0	0	0
ALG6	3275	2701	3556	2221	3035	2902	2936	2486	2354	2709	3262	2235	3428	2517	2882	2263	3191	2396	2189	3272	4578	4260	5365	3869
ITGB3BP	2201	1943	2574	1418	1884	2133	2000	1512	1605	1933	2007	1455	1967	1609	1939	1723	1847	1502	1423	1857	3046	2891	3277	2421
EFCAB7	665	598	923	515	740	811	611	565	514	625	737	486	615	676	650	449	637	549	510	845	1089	1018	1136	794
DLEU2L	28	22	10	8	2	18	14	15	16	18	18	8	33	30	10	4	20	14	4	0	12	16	20	15
PGM1	4695	4182	5593	3005	3812	4531	4489	3462	3650	3806	4109	3351	4599	3686	4227	3379	4276	3633	3472	4323	5517	5326	6843	5257
ROR1	838	805	984	604	830	796	982	652	591	746	959	597	915	778	831	659	728	680	695	967	1245	1180	1299	1022
ROR1-AS1	0	0	0	0	0	0	0	4	0	0	0	0	0	0	0	0	0	0	2	0	0	2	0	0
UBE2U	0	0	0	0	0	6	0	0	0	0	0	0	0	0	0	2	0	0	0	0	0	0	2	0
CACHD1	4063	3914	4883	2743	3853	4121	4140	3359	3088	3589	3942	2555	4336	3226	3948	3102	3589	3312	3174	4285	5610	5312	6524	4971
MIR4794	0	0	1	0	0	0	0	0	0	0	0	0	0	0	0	0	0	0	0	0	0	2	0	0
RAVER2	4144	3778	5041	2489	3975	3772	3910	3327	2923	3372	3811	2821	3985	3175	3983	2989	3477	3128	2949	3956	5493	5539	6144	4567
JAK1	7066	6163	8569	4806	6432	6658	6583	5712	5018	6023	6436	4868	6842	5309	6279	5035	6207	5268	5393	7151	9518	9165	10537	8206
LINC01359	2	6	4	0	0	0	0	0	8	0	0	0	0	0	0	0	0	0	0	0	0	1	0	0
	2	0	4	2	4	0	6	0	5	0	12	10	1	0	2	0	6	0	1	0	4	0	6	3
MIR3671	4	4	0	2	0	2	9	6	0	0	6	1	0	2	1	1	0	2	1	0	4	3	0	1
MIR101-1	0	0	0	0	0	0	0	0	0	0	0	0	0	0	0	0	0	0	0	0	0	0	0	0
AK4	3577	3130	4355	2260	3438	3299	3619	2926	2736	2932	3284	2190	3520	2782	3411	2283	3422	2802	2546	3196	4627	4436	4969	4151
DNAJC6	1693	1452	1605	1055	1426	1654	1628	1104	1120	1363	1644	1053	1630	1155	1590	1277	1294	1294	1247	1631	2244	2194	2535	1976
LEPROT	1876	1760	2105	1244	1395	1674	1787	1396	1349	1572	1608	1150	1629	1716	1875	1250	1532	1377	1287	1795	2473	2541	2986	2041
LEPR	1034	1013	1517	614	1091	966	994	824	579	927	969	660	962	1006	1047	754	890	791	678	1127	1554	1498	1546	1249
PDE4B	34	24	18	22	40	26	14	31	20	10	32	32	47	21	28	14	18	18	10	18	31	43	25	30
PDE4B-AS1	0	0	0	0	0	0	0	0	0	0	0	0	0	0	0	0	0	0	0	0	0	0	0	0
SGIP1	2	10	2	8	0	8	6	4	10	4	7	0	14	0	8	2	0	4	2	0	2	0	10	16
MIR3117	0	0	0	0	0	0	0	0	0	0	0	0	0	0	0	0	0	0	0	0	0	0	0	0
DYNLT5	0	0	0	0	0	0	0	0	0	0	0	0	0	0	0	0	0	0	0	0	0	0	0	0
INSL5	0	0	0	0	4	0	0	0	0	0	0	0	0	0	0	0	14	0	0	0	0	0	0	0
DNAI4	49	44	60	46	35	19	50	31	34	15	84	25	41	51	61	14	35	44	34	54	66	63	75	34
MIER1	4212	4016	4909	2631	4007	3724	3855	3193	2751	3517	3967	3149	3990	3195	4048	3004	3584	3121	2893	4244	5442	5665	6458	5058
SLC35D1	2461	2206	2989	1781	2377	2304	2381	1985	1800	2398	2086	1614	2545	2119	2513	1875	2117	2107	1834	2405	3386	3391	4043	2998
C1orf141	0	0	0	0	0	0	0	0	0	0	0	0	0	0	0	0	0	0	0	0	0	0	0	0
IL23R	0	0	0	0	0	1	0	4	0	0	0	0	0	0	6	0	0	0	0	0	0	0	0	0
IL12RB2	347	276	392	249	267	320	283	208	258	243	315	213	321	203	342	252	184	273	230	316	484	508	520	392
SERBP1	69682	60399	82485	45939	64047	62454	64399	53636	50305	57270	63001	47223	68023	54271	63991	49748	59392	52896	49538	64393	89098	86512	103645	79965
GADD45A	596	586	891	546	746	735	700	641	538	603	657	468	807	576	755	455	679	602	524	791	913	760	1128	880
GNG12	4666	3967	5714	3001	4253	3847	4134	3519	3052	3643	4071	3020	3994	3719	4299	3183	3770	3579	3060	4480	6597	6323	7464	5662
GNG12-AS1	12	33	28	15	5	22	6	11	20	28	13	5	31	23	32	20	13	11	21	8	28	30	38	23
DIRAS3	30	24	6	10	10	25	14	8	26	14	14	7	14	21	14	6	11	3	12	57	10	10	30	34
WLS	6440	5264	6831	3796	5159	4961	5343	4099	4168	4439	5003	3773	5437	4226	4840	3789	4712	4551	4045	5294	6540	6223	7227	5737
MIR1262	0	0	0	2	0	0	0	0	0	0	3	0	0	1	0	0	0	0	0	0	0	0	0	0
RPE65	0	0	0	0	0	1	0	0	0	0	0	0	0	0	0	0	0	0	0	0	0	0	0	0
DEPDC1	9538	8177	11640	6416	9231	8965	8844	7210	6783	8365	8916	6326	9873	7234	8855	6956	7911	7023	6505	9310	13040	13446	15524	11379
DEPDC1-AS1	18	14	2	11	0	15	22	10	8	12	10	10	11	2	6	4	8	0	6	0	22	15	20	4
LRRC7	33	38	48	26	39	15	26	10	22	21	20	5	44	38	38	53	43	11	49	31	78	67	76	42
PIN1P1	0	6	3	0	0	0	1	6	0	2	0	0	2	0	4	0	2	0	0	1	0	0	0	2
LRRC40	3987	3527	5061	2666	3435	3531	3524	2907	2618	3154	3563	2512	3856	3036	3710	2845	3484	2671	2585	3518	5051	5132	5776	4579
SRSF11	14026	13038	17018	10243	13676	14351	13456	11745	10635	12756	13639	10222	14328	11277	13941	10901	12249	11248	10371	13988	21390	21023	23394	16042
ANKRD13C	3211	2613	3664	1872	2832	2949	2692	2223	2169	2372	2782	1966	2967	2330	2887	2255	2543	2057	2072	2965	4027	3649	4623	3485
ANKRD13C-DT	415	398	517	299	421	414	384	358	397	356	346	296	364	286	483	325	387	352	421	358	502	514	690	382
CTH	681	668	940	514	672	579	738	542	595	684	712	510	694	615	684	589	689	620	527	623	1004	822	1006	751
LINC01788	0	0	0	0	0	0	0	0	0	0	0	0	0	0	0	0	0	0	0	0	0	0	0	0
PTGER3	6	2	10	4	0	21	20	0	2	6	14	10	0	10	12	6	6	0	4	0	4	16	16	13
ZRANB2-AS1	35	85	71	45	36	93	41	40	38	89	70	31	47	58	71	42	40	35	30	84	92	91	74	60
ZRANB2	8286	7776	9928	6115	7251	7442	7843	6699	6483	7390	8068	5762	8837	6721	7858	6586	7796	6611	6186	9165	13485	13076	14371	10156
MIR186	15	8	15	3	19	13	10	3	13	22	2	9	13	10	2	2	7	18	7	32	15	12	31	19
ZRANB2-DT	10	25	16	12	14	16	3	13	2	12	2	11	2	13	33	6	1	7	0	0	11	12	23	16
NEGR1	9	10	12	0	18	1	0	4	8	4	0	6	10	14	4	2	2	4	10	0	8	16	12	18
NEGR1-IT1	0	0	0	0	0	0	0	0	0	0	0	0	0	0	0	0	0	0	0	0	0	0	0	0
LINC01360	0	0	0	0	0	0	0	0	0	0	0	0	0	0	0	0	0	0	0	0	0	0	0	0
LRRIQ3	157	123	177	98	171	139	147	146	111	95	130	100	195	153	156	136	152	95	115	159	239	174	289	184
FPGT-TNNI3K	0	0	0	0	0	0	0	0	0	0	0	0	0	0	0	0	0	0	0	0	0	0	0	0
FPGT	1652	1498	1998	1109	1799	1460	1545	1301	1217	1483	1674	1062	1733	1319	1699	1362	1478	1157	1191	1936	2238	2359	2770	1916
TNNI3K	0	0	0	0	0	0	0	0	0	0	0	0	0	0	0	0	0	0	0	0	0	0	0	0
	0	0	0	0	0	0	0	0	0	0	0	0	0	0	0	0	0	0	0	0	0	0	0	0
LRRC53	0	0	0	0	0	0	0	0	0	0	0	0	0	0	0	0	0	0	0	0	0	0	0	0
ERICH3	2	0	0	0	0	0	0	0	0	8	0	0	0	0	0	0	0	2	0	0	2	1	0	0
ERICH3-AS1	0	0	0	0	0	0	0	0	0	0	4	0	0	0	0	0	1	0	0	0	0	0	0	0
CRYZ	2296	2127	2591	1483	2140	2121	2290	1734	1636	1785	2244	1448	2433	1795	2072	1814	2036	1912	1706	2013	3158	3069	3579	2639
TYW3	4121	3730	4959	2858	3709	4085	3876	3105	2858	3627	3754	3121	4281	3263	3879	3202	3891	3313	2695	4013	5765	5381	6914	5182
LHX8	449	345	403	241	328	384	330	300	299	305	345	198	325	285	386	283	358	286	305	381	594	414	423	383
SLC44A5	784	701	1195	532	775	833	776	703	563	620	722	478	896	462	653	538	514	607	593	745	1168	1018	1323	808
ACADM	5309	4246	6055	3296	4635	4619	4730	3994	3766	3998	4828	3361	4819	3890	4526	3875	4156	3811	3553	4906	7028	6926	8208	6384
DLSTP1	397	403	530	350	394	461	399	396	412	358	325	300	400	431	391	335	303	374	336	289	650	639	845	639
RABGGTB	5947	5172	7037	3941	5224	5437	5342	4705	4538	4570	4940	3744	5676	4175	5271	3928	5202	4285	4195	5625	7869	7974	8488	6408
SNORD45C	35	25	23	13	20	53	14	20	19	18	40	17	25	12	11	16	16	25	21	12	55	30	39	16
SNORD45A	35	19	19	5	9	21	10	12	4	12	17	2	13	8	9	19	5	11	5	3	26	28	17	10
SNORD45B	25	29	33	16	38	25	34	20	13	29	27	38	30	45	43	39	22	25	22	30	41	54	31	25
MSH4	34	38	30	16	19	52	29	18	29	52	44	28	24	26	26	36	53	17	38	47	79	49	71	41
ASB17	0	0	0	0	0	0	0	0	0	0	2	0	0	2	0	0	0	0	0	0	0	0	0	0
LOC101927342	0	0	0	0	0	0	1	0	0	0	0	0	0	0	0	0	0	0	0	0	2	0	0	0
ST6GALNAC3	679	710	926	539	781	639	662	457	483	587	677	469	704	615	583	503	658	517	457	772	999	872	1091	860
ST6GALNAC5	86	83	108	42	66	53	79	57	39	66	87	38	70	63	75	68	46	51	53	67	75	119	85	80
MIR7156	0	0	0	0	0	0	0	0	0	0	0	0	0	0	0	0	0	0	0	0	0	0	0	0
PIGK	6191	5240	7000	4022	5654	5145	5581	4560	4160	4619	5132	4010	5940	4638	5636	4545	5516	4262	3874	5984	8516	8272	9662	7522
AK5	56	71	106	77	23	116	94	56	81	48	104	60	146	63	88	62	69	32	93	86	60	115	110	78
ZZZ3	7813	6441	8495	4624	6952	6702	6962	5806	4933	6030	6801	5014	7287	5251	6653	5367	6230	5469	5237	7300	10250	10130	11300	8953
USP33	8049	7064	9863	5716	7841	7453	7763	5976	5782	6433	7093	5778	8373	6385	7457	6047	7100	6660	5848	8046	11238	11230	13179	9864
MIGA1	2450	2080	2774	1475	2149	2109	2453	2041	1639	1962	2209	1459	2391	2005	2473	1786	2144	1855	1802	2266	3464	3360	3834	2683
NEXN-AS1	21	22	19	19	18	1	16	22	4	16	20	20	9	16	11	8	14	2	4	4	14	18	24	10
NEXN	1013	871	1213	672	828	945	996	797	661	879	837	564	901	723	927	679	808	649	557	708	1503	1348	1568	1194
FUBP1	10236	9100	12177	7221	9389	9669	9255	8103	7489	8392	8941	6718	10109	8259	9869	7266	7904	8299	7888	9978	14703	13800	16567	12339
DNAJB4	1623	1320	1815	1036	1589	1594	1719	1429	1316	1652	1585	1338	1936	1466	1874	1453	1797	1531	1265	1981	2592	2805	3249	2325
GIPC2	8	24	21	24	26	14	12	10	19	34	12	17	22	32	8	8	12	28	20	58	29	58	36	52
MGC27382	0	0	5	0	0	2	1	0	0	0	0	0	0	0	4	1	2	0	0	0	2	0	0	2
PTGFR	17	20	62	16	58	57	28	24	38	38	56	0	14	3	24	14	22	36	12	40	28	48	26	26
IFI44L	0	12	30	2	14	34	12	6	0	4	6	14	12	1	19	12	36	8	14	52	12	22	14	16
IFI44	4	0	0	0	0	0	0	0	0	0	0	0	0	20	0	0	0	0	2	0	0	0	0	0
ADGRL4	0	0	0	0	0	0	0	0	0	0	0	0	6	0	0	0	0	0	0	0	4	0	0	0
LINC01781	0	0	0	0	0	0	0	0	0	0	0	0	0	0	0	0	0	0	0	0	0	0	0	0
ADGRL2	9656	8346	11093	6499	8548	8761	9103	7719	6508	7915	8564	6397	9959	8034	8972	6806	7742	7361	6951	9418	12152	12810	14562	11025
LOC101927434	0	0	0	0	0	0	0	0	0	0	0	0	0	0	0	0	0	0	0	0	0	0	0	0
LINC01361	2	0	4	4	0	0	6	7	0	8	0	10	0	0	0	11	2	6	6	0	6	8	9	2
LINC01725	1	1	19	2	1	6	2	3	7	2	12	4	3	16	0	8	0	2	0	0	2	16	6	17
LOC101927560	0	2	9	0	0	4	4	0	3	0	3	0	0	0	0	9	1	1	0	0	1	5	0	0
TTLL7	468	484	833	460	461	453	539	487	370	594	395	352	665	519	465	464	399	459	400	634	661	892	909	618
PRKACB	2462	2353	2825	1500	2365	2234	2335	1961	1586	2017	2208	1707	2462	1897	2273	1690	1916	1779	1647	2238	3466	3319	3673	2847
SAMD13	52	48	81	54	84	89	40	35	53	108	76	28	102	50	51	24	73	57	27	112	102	79	117	120
UOX	15	2	30	0	18	4	6	8	0	0	0	6	4	13	0	0	2	1	0	0	8	3	4	6
DNASE2B	0	0	0	0	0	6	0	0	0	0	0	4	0	0	4	0	8	0	0	0	0	2	2	10
RPF1	5003	4190	5525	3115	4110	4468	4324	3382	3518	3489	3885	3303	4394	3568	4320	3367	4577	3698	3284	3903	5888	6194	6807	5541
GNG5	3236	3094	4284	2370	3235	2953	3148	2632	2676	2749	3779	2344	3414	2645	3221	2518	3187	2884	2574	3074	4807	4649	5474	4194
SPATA1	10	2	0	14	12	0	5	16	2	14	32	7	9	4	9	12	17	10	5	55	20	23	8	10
CTBS	421	383	397	285	368	302	364	342	343	293	285	213	426	303	382	324	368	283	350	393	627	505	688	534
LINC01461	30	40	30	17	38	34	16	34	41	13	28	48	36	29	33	33	16	21	32	26	40	60	97	49
LINC01555	2	0	6	0	0	0	0	2	0	0	0	0	0	0	0	2	2	6	0	4	0	0	0	0
SSX2IP	5051	4575	6034	3457	4729	4774	4775	3753	3317	4111	4414	3558	5129	3803	4790	3604	4314	3774	3266	4729	6959	6389	7579	6317
LPAR3	1772	1700	2053	1196	1735	1619	1825	1478	1428	1348	1789	1454	1838	1383	1811	1481	1771	1402	1407	1883	2435	2494	2885	2247
MCOLN2	884	803	1033	565	793	783	917	694	672	857	952	528	852	523	881	704	667	639	649	863	1252	1119	1382	914
MCOLN3	430	376	495	296	366	361	318	304	400	399	323	240	359	346	254	259	326	245	228	378	758	548	706	373
DNAI3	96	95	100	69	141	117	107	91	74	82	61	75	131	60	79	49	99	50	71	210	195	155	178	115
MIR4423	0	0	0	0	0	0	0	0	0	0	0	0	0	0	0	0	0	0	0	0	0	0	0	0
SYDE2	961	943	1210	638	1118	1004	1095	784	611	916	1013	643	973	867	975	687	750	818	755	982	1543	1397	1849	1522
C1orf52	2753	2573	3137	1762	2554	2477	2572	2280	1901	2305	2803	1865	2805	2255	2335	1911	2322	2074	1900	2872	3606	3598	4059	3279
BCL10	1099	1009	1066	688	1086	932	1056	848	671	863	1065	753	873	772	981	812	902	802	732	968	1205	1322	1510	1202
BCL10-AS1	18	0	4	4	0	2	6	10	0	6	6	14	13	0	0	0	4	2	4	16	8	0	4	2
DDAH1	2884	2734	3779	2027	2931	2815	2794	2264	2166	2422	2724	2010	2670	2462	2729	2098	2421	2244	2002	2961	3599	3746	4351	3301
CCN1	312	300	537	229	419	344	348	343	244	328	423	314	518	319	392	300	397	386	406	286	455	469	617	530
ZNHIT6	5124	4147	5399	3033	4577	4518	4778	3891	3698	4207	4459	3537	5058	3822	4373	3612	4288	3746	3583	4456	6794	7026	8175	6236
COL24A1	78	77	89	46	73	64	85	44	40	55	91	62	114	24	84	32	38	32	50	50	43	66	116	77
ODF2L	1137	945	1544	777	1104	1096	1078	852	796	1134	1057	819	1100	953	999	881	983	921	805	875	1744	1634	1981	1399
MIR7856	0	0	3	0	7	0	0	0	0	0	0	0	0	0	0	0	0	0	0	0	0	2	0	0
CLCA2	0	0	0	0	0	0	0	0	0	2	0	0	0	4	0	0	0	0	0	0	2	0	0	0
CLCA1	0	0	0	0	0	0	0	0	0	0	0	0	0	0	0	0	0	0	0	0	0	0	0	0
CLCA4	0	0	0	0	0	0	0	0	0	0	0	0	0	0	0	0	0	0	0	0	0	0	0	0
CLCA3P	0	0	0	0	0	0	0	0	0	0	0	0	0	0	0	0	0	0	0	0	2	0	0	0
CLCA4-AS1	31	14	14	14	13	16	24	9	20	14	10	10	8	17	30	26	18	23	11	6	26	36	32	29
SH3GLB1	6222	5598	7459	3930	6066	5609	5955	4777	4449	5194	5865	4348	6113	4670	5252	4773	5075	4693	4601	5706	8343	8087	9482	7615
SELENOF	11209	9406	13313	7091	9520	9508	9985	8074	7712	8813	9466	7080	10438	8524	9769	7913	9879	7779	7962	10469	14187	13881	15809	12454
HS2ST1	6770	5751	8065	4242	6115	5982	6118	5408	4643	5194	6160	4693	7159	5217	6418	4763	5395	4952	5002	6591	8754	8940	10110	8113
LINC01140	27	10	41	18	33	24	29	23	31	47	6	17	15	20	34	21	26	21	45	8	37	65	50	36
LINC02801	0	0	0	0	0	0	0	0	0	0	0	0	0	0	0	0	0	0	0	0	0	0	0	0
	0	0	0	0	0	0	0	0	0	0	0	0	0	0	0	0	0	0	0	0	0	0	0	0
LMO4	4150	3399	4411	2527	3293	3418	3671	2703	3026	2725	3363	2605	3800	3152	3582	2900	3290	2981	2974	3025	4376	4211	5187	4019
LINC01364	0	0	0	0	5	0	0	0	0	0	0	0	0	0	0	0	2	0	0	14	0	0	0	0
PKN2-AS1	0	12	16	0	12	1	2	3	14	8	6	4	11	2	16	8	7	2	2	0	17	10	6	4
PKN2	8379	7216	9452	5365	7068	7386	7458	6218	5344	6525	7217	5251	8061	6146	7168	5628	6476	5859	5662	8125	11165	11013	12479	9356
GTF2B	1925	1472	2121	1220	1831	1694	1736	1413	1401	1392	1655	1352	2147	1578	1762	1467	1811	1490	1396	1686	2348	2399	2823	2221
KYAT3	1928	1498	1988	1290	1333	1449	1538	1367	1156	1389	1334	1136	1516	1148	1696	1215	1522	1150	1266	1837	2288	2132	2665	2062
RBMXL1	3513	3106	4141	2334	3387	2863	3082	2733	2518	2804	3011	2252	3447	2868	3259	2670	2879	2640	2404	3471	4742	4668	5705	3921
GBP3	0	3	4	0	0	4	0	0	4	6	0	2	0	0	1	0	0	2	0	0	14	2	1	4
GBP1	0	0	0	1	2	2	0	0	0	0	0	0	3	0	0	0	0	0	0	0	4	8	2	0
GBP2	3	4	0	12	0	19	2	10	0	0	4	11	0	2	11	2	10	4	4	6	6	3	14	4
GBP7	0	0	0	0	6	0	0	0	0	4	0	0	0	0	0	0	0	2	0	0	0	0	4	0
GBP4	0	0	0	0	0	0	0	0	0	0	0	0	0	2	0	0	0	0	0	0	0	0	0	0
GBP5	0	0	0	0	0	0	0	0	0	0	0	0	0	0	0	0	0	0	0	0	0	0	0	0
LOC729930	2	2	0	4	0	2	0	0	8	8	11	0	10	4	5	0	0	2	0	8	2	0	6	0
GBP6	6	2	1	0	0	4	2	0	0	0	0	0	0	0	4	2	2	0	4	0	0	0	12	12
GBP1P1	36	21	72	39	46	48	46	49	53	28	38	5	50	23	57	22	23	31	15	33	26	43	49	50
LRRC8B	2285	2248	2527	1491	2217	2059	2356	1794	1602	1882	2137	1336	2349	1748	2347	1715	2112	1754	1699	1886	3077	3136	3284	2663
LRRC8C	2791	2172	3347	1528	2291	2307	2318	2140	1752	2203	2368	1730	2436	2098	2344	1848	1922	1715	1677	2587	3491	3319	4085	3024
LRRC8C-DT	5	5	48	18	28	11	3	20	11	10	30	12	26	12	13	5	6	2	8	20	17	18	54	36
LRRC8D	1649	1575	2056	1131	1724	1440	1457	1311	1146	1197	1458	1094	1556	1300	1633	1246	1457	1221	1114	1390	2000	2143	2479	1766
	0	0	0	4	0	1	0	0	4	0	0	0	0	0	0	0	0	4	2	0	0	0	0	0
GEMIN8P4	270	204	280	177	196	254	231	223	229	151	330	124	260	244	167	187	289	126	175	135	349	328	408	225
ZNF326	4935	4201	5631	3336	4510	4461	4635	4309	3581	4075	4847	3278	4777	3732	4475	3679	4180	3675	3354	4833	7099	6881	8603	5920
BARHL2	198	191	269	114	151	198	200	172	161	110	233	180	228	162	249	179	180	214	163	198	188	252	294	186
ZNF644	6449	5362	7323	4155	6031	5952	6234	4917	4564	5089	6202	4275	6205	4741	5468	4657	5158	4814	4451	6216	9170	9077	10160	8089
HFM1	72	52	102	44	40	70	43	42	60	52	68	74	70	58	44	68	52	46	68	32	79	114	98	70
CDC7	7476	6279	9095	4771	6470	6332	6812	5699	5156	5956	6444	4993	7227	5481	6675	5116	5716	5223	4712	6947	9946	9509	10915	8183
TGFBR3	3355	2711	3508	1901	2989	2723	2957	2195	2053	2413	2794	1921	2871	2174	2695	2183	2404	2291	2128	2710	3875	3741	5120	3560
BRDT	0	0	0	0	0	0	0	8	0	0	0	0	0	0	0	0	0	0	0	0	0	0	0	0
EPHX4	200	232	270	138	184	187	198	122	168	157	239	180	203	191	231	164	224	148	163	223	227	309	348	243
SETSIP	220	293	246	169	165	162	162	228	210	226	268	94	183	156	188	145	209	165	166	213	153	167	196	182
BTBD8	45	43	58	22	43	39	41	17	30	49	8	25	25	34	22	24	10	26	16	34	57	20	45	44
	172	140	195	100	132	149	160	137	103	182	184	85	84	105	151	148	114	99	156	153	264	273	228	196
C1orf146	3	0	4	0	0	8	1	2	5	5	4	2	2	0	13	6	4	1	2	8	5	0	2	6
GLMN	2334	1800	2614	1341	1880	1706	1974	1461	1509	1618	1756	1251	1842	1406	1805	1588	1711	1451	1414	1822	2712	2773	2999	2343
RPAP2	2480	2223	3055	1604	2151	2520	2282	2081	1716	1999	2119	1701	2272	1736	2551	1860	1963	1780	1740	2528	3649	3697	3993	2829
GFI1	407	333	397	260	268	401	432	291	298	297	450	199	376	275	436	295	319	360	304	415	476	605	529	473
EVI5	2308	2041	2907	1568	2081	1901	2048	1644	1511	2002	2133	1566	2173	1691	2141	1637	2011	1648	1772	2625	4109	3607	4378	3371
RPL5	79319	69081	95355	54305	70145	73147	74219	60685	62160	62693	69269	52823	77838	58545	72995	54756	69995	59579	59234	68579	102097	96256	116105	88384
DIPK1A	1194	1054	1394	678	1147	975	1090	852	694	854	946	660	1068	782	1019	723	1038	718	782	1162	1457	1420	1736	1337
SNORD21	1	1	5	6	0	8	12	6	2	10	6	0	11	4	3	4	0	5	0	18	9	15	5	5
SNORA66	30	20	34	9	11	17	15	31	19	22	11	2	23	16	31	16	17	9	9	20	23	32	19	16
MTF2	5351	4538	6137	3500	4696	4896	5004	4452	3844	4468	4626	3669	5322	4292	4691	3897	4409	4038	3817	5106	7522	7304	8313	6436
TMED5	10876	8711	12420	6433	9309	8730	9843	7832	7262	8669	9656	7448	10496	8213	10048	8366	9105	7697	7657	11524	16310	15462	18089	13703
CCDC18	1413	1445	1763	1222	1560	1246	1227	1311	1125	1458	1549	1113	1242	1090	1391	1172	1340	1153	1191	1469	2338	2170	2423	1594
CCDC18-AS1	115	97	185	145	98	100	138	140	66	120	106	60	61	86	98	152	142	104	82	120	175	153	239	119
DR1	10290	8654	11305	6282	8650	8595	8484	7379	6661	7683	8820	6356	10106	7844	9074	7003	8957	7414	7424	8453	12717	12607	14599	11224
FNBP1L	2828	2251	3027	1797	2477	2230	2404	2050	1729	2150	2308	1934	2388	1804	2495	1837	2267	1981	1847	2752	3655	3614	4035	3042
	0	3	0	0	0	0	0	1	2	1	0	0	0	0	0	0	0	3	1	0	2	10	0	1
BCAR3	378	436	386	253	413	407	404	290	287	274	249	278	397	287	446	266	415	332	347	274	395	412	556	486
BCAR3-AS1	8	0	0	0	0	0	0	12	0	0	0	2	0	6	0	0	0	1	0	14	6	8	2	6
MIR760	0	2	0	4	0	0	0	0	0	0	0	0	3	0	0	0	0	0	0	0	0	0	0	0
TRR-TCT1-1	0	0	0	0	0	6	0	0	0	2	0	0	0	0	0	0	0	5	0	10	1	2	0	0
DNTTIP2	7519	6193	8742	4775	6840	6221	6659	5290	5279	6074	6859	4858	7010	5485	6916	5257	6291	5169	5036	7506	9726	9796	11499	8290
GCLM	4740	3707	5283	2894	3955	3979	4506	3385	3467	4096	4359	3466	4751	3600	4256	3492	4196	3531	3509	4247	6539	5983	7269	5871
ABCA4	0	0	7	0	0	0	0	2	6	0	0	0	0	0	0	0	0	0	0	0	0	6	4	4
ARHGAP29	2333	1939	2578	1461	2173	2126	1933	1585	1474	1606	1878	1685	2317	1548	2038	1650	1807	1592	1454	1887	3057	3022	3378	2674
ABCD3	7585	6868	9358	4839	6849	7055	6950	6231	5275	5841	6077	5148	7829	5720	6941	5566	6190	5443	5230	7503	10113	10017	11328	8607
F3	76	93	93	63	80	109	114	92	80	86	101	61	142	65	94	63	125	76	64	55	212	182	147	164
SLC44A3-AS1	23	27	28	6	9	17	13	9	17	13	38	26	16	15	26	10	18	6	20	4	18	37	14	21
MIR378G	0	2	0	0	0	0	0	0	0	0	0	0	0	0	0	0	0	0	0	0	0	5	0	0
SLC44A3	126	135	156	84	147	110	121	89	79	86	122	97	162	95	118	123	69	82	98	36	169	160	169	129
CNN3	8873	8056	10386	5607	8104	8112	8331	6680	6581	7179	8201	5790	8538	6811	8064	6247	7844	6921	6693	8336	11163	10995	13342	10318
	10	1	43	6	0	12	6	7	0	8	4	0	4	4	2	5	0	5	13	0	5	10	7	15
CNN3-DT	95	79	55	56	124	88	97	58	60	114	114	27	123	98	62	45	61	51	51	95	132	75	127	73
ALG14	1095	890	1276	743	888	911	849	694	788	847	768	651	947	716	1030	671	864	857	793	918	1284	1237	1575	1127
ALG14-AS1	0	0	0	0	0	0	0	0	0	0	0	0	0	10	0	1	0	4	0	0	0	0	0	0
TLCD4	1396	998	1535	677	1049	980	1095	925	760	972	825	618	1160	964	1021	805	935	835	730	968	1518	1431	1659	1183
TLCD4-RWDD3	16	5	29	13	24	10	13	35	22	18	14	5	7	13	19	25	20	9	7	18	42	42	36	14
RWDD3-DT	0	0	2	2	0	2	8	3	0	0	0	2	4	0	1	0	0	2	0	0	0	0	0	5
RWDD3	352	295	368	218	210	234	331	248	317	249	328	241	302	230	307	240	299	236	232	250	426	427	483	289
LINC01761	0	0	0	0	0	0	0	0	0	0	0	0	0	0	0	0	0	0	0	0	0	0	0	0
LINC02607	0	0	0	0	0	0	0	0	0	0	0	0	0	0	0	0	0	0	0	0	0	0	0	2
LINC02790	0	0	0	0	0	0	0	0	0	0	0	0	0	0	0	0	0	0	0	0	0	0	0	0
LINC01787	1	0	0	0	0	0	0	0	0	0	0	0	0	0	0	0	0	0	0	0	0	0	0	0
PTBP2	1645	1633	1833	1044	1417	1752	1532	1322	1235	1384	1611	1138	1474	1240	1331	1234	1408	1133	1056	1608	2227	2020	2456	1802
DPYD	80	68	78	44	101	71	45	53	49	67	63	40	68	60	111	33	54	50	86	28	73	96	132	84
DPYD-AS1	0	0	0	0	0	0	0	0	0	0	0	0	0	0	0	0	0	0	0	0	0	0	0	0
DPYD-AS2	0	0	0	0	0	0	0	0	0	0	0	0	0	0	0	0	0	0	0	0	0	0	0	0
MIR137HG	0	0	0	0	0	0	0	0	0	0	0	0	0	0	0	0	0	0	0	0	0	0	0	0
MIR2682	0	0	0	0	0	0	0	0	0	0	0	0	0	0	0	0	0	0	0	0	0	0	0	0
MIR137	0	0	0	0	0	0	0	0	0	0	0	0	0	0	0	0	0	0	0	0	0	0	0	0
LINC01776	0	0	0	0	0	0	0	0	0	0	0	0	0	0	0	0	0	0	0	0	0	0	0	0
SNX7	1932	1807	2266	1370	1681	1611	1692	1393	1316	1434	1586	1234	1781	1431	1847	1319	1580	1307	1285	1693	2193	2218	2639	2037
PLPPR5	4	16	6	10	18	25	12	12	16	6	20	17	2	20	4	5	9	10	6	0	26	15	8	24
PLPPR5-AS1	0	0	0	0	0	0	0	0	0	0	0	0	0	0	0	0	0	0	0	0	0	0	0	0
PLPPR4	60	52	53	68	44	38	57	45	52	86	70	48	82	72	48	64	61	50	38	52	88	84	146	86
LINC01708	0	0	0	0	0	0	0	0	0	0	0	0	0	0	0	0	0	0	0	0	0	0	0	0
PALMD	26	42	22	6	10	62	42	18	20	6	26	8	0	0	6	12	30	18	16	71	26	24	54	34
FRRS1	1148	906	1369	731	1022	1054	955	730	834	961	880	799	1141	731	1179	752	882	779	790	1083	1630	1533	2051	1265
AGL	5899	5376	7372	3944	5435	5757	5353	4798	3853	4891	5261	4139	5534	4380	5212	3966	4459	4155	3789	6126	7866	7592	8653	7068
SLC35A3	1884	1770	2350	1311	1935	1732	1710	1401	1339	1489	1803	1296	1726	1410	1845	1474	1677	1294	1413	1965	2784	2650	2877	2151
MFSD14A	3992	3282	4384	2481	3598	3763	3577	2949	2677	3190	3392	2857	3742	3062	3265	2836	3441	2979	2757	3910	5270	4966	5729	4529
SASS6	3290	2630	3839	2109	3091	2955	2760	2316	2057	2914	3049	2162	3383	2498	2967	2293	2732	2425	2464	3055	5250	4544	5306	3796
TRMT13	1528	1350	1809	1092	1360	1332	1172	1158	1107	1218	1519	977	1433	1281	1410	1156	1253	1048	1056	1126	2230	1939	2456	1609
LRRC39	32	55	116	59	34	72	64	52	34	51	51	59	37	46	56	50	40	44	55	86	64	84	49	51
DBT	4183	3326	4528	2410	3483	3499	3672	3216	2871	3357	3683	2623	3812	2985	3705	2853	3286	3020	2928	4138	4993	4864	5546	4382
RTCA-AS1	29	22	24	13	27	25	29	27	22	27	12	23	13	6	33	4	21	24	18	79	43	37	48	41
RTCA	2724	2401	3608	1906	2462	2674	2644	2222	2254	2337	2424	1861	3019	2191	2930	2144	2443	2145	2372	2605	3990	4035	4681	3410
MIR553	0	0	0	1	0	1	0	0	0	0	0	0	0	3	0	0	1	0	0	0	2	7	0	0
CDC14A	1254	1094	1593	880	1252	1231	1175	1072	949	1188	1043	851	1298	1128	1208	907	1083	974	949	1033	1714	1892	2073	1340
GPR88	4	13	15	2	2	0	2	2	0	4	0	8	14	1	13	0	0	8	12	0	22	4	12	12
LINC01349	0	0	0	0	0	0	0	0	0	0	0	0	0	0	0	0	0	0	0	0	0	0	0	0
VCAM1	0	0	0	0	0	0	0	0	0	0	0	0	0	0	0	0	0	0	0	0	0	0	0	0
EXTL2	1656	1419	1931	1091	1796	1625	1600	1328	1394	1428	1778	1180	1635	1446	1749	1313	1603	1199	1261	2047	2621	2349	2732	2005
SLC30A7	2480	1964	2668	1401	2088	2169	2274	1856	1714	2056	2388	1559	2528	1973	2414	1918	2143	1898	1714	2371	3612	3706	3936	2904
DPH5	3033	2621	3318	1876	2388	2603	2552	2155	2128	2393	2618	1894	2597	2165	2661	2163	2591	2189	2074	2666	3827	3507	4521	3208
DPH5-DT	249	321	329	151	222	188	260	252	210	208	208	220	213	209	292	235	275	231	173	175	392	394	473	244
LOC101928334	0	0	0	0	0	0	0	0	0	0	0	0	0	0	0	0	0	0	0	0	0	0	0	0
S1PR1-DT	0	0	0	2	0	12	4	0	2	4	0	2	0	3	1	2	4	4	3	0	2	2	10	2
S1PR1	134	109	122	94	135	115	146	142	110	133	171	89	122	107	152	101	174	111	121	96	212	199	191	116
LINC01307	0	0	0	0	0	0	0	0	0	0	0	0	0	0	0	0	0	0	0	0	0	0	0	0
OLFM3	0	2	2	0	6	0	0	0	0	4	0	0	4	2	0	6	0	1	0	0	0	10	0	0
DNAJA1P5	0	0	0	0	0	0	0	0	0	1	0	1	0	0	0	0	0	0	0	0	0	0	0	0
COL11A1	13	17	20	5	20	5	22	12	8	16	6	9	21	18	45	8	14	10	16	8	12	20	6	4
RNPC3-DT	0	0	0	0	0	1	2	4	8	0	0	2	0	0	0	0	0	0	0	0	0	8	0	0
RNPC3	727	712	910	587	712	787	786	616	538	718	791	546	922	559	806	521	652	717	569	735	1257	1074	1204	842
AMY2B	154	72	112	95	67	103	94	79	78	73	70	77	77	90	100	51	104	79	59	67	232	162	207	79
ACTG1P4	0	4	0	0	3	6	2	2	14	4	18	4	0	10	2	3	2	2	6	0	0	5	18	10
AMY2A	0	0	0	0	0	0	0	0	0	0	0	0	0	0	0	0	0	0	0	0	0	0	0	0
AMY1A	0	0	0	0	0	0	0	0	0	0	0	0	0	0	0	0	0	0	0	0	0	0	0	0
AMY1B	0	0	0	0	0	0	2	0	0	0	0	0	0	0	0	0	0	0	0	0	0	0	0	0
AMY1C	0	0	0	0	0	0	0	0	0	0	0	0	0	0	0	0	0	0	0	0	0	0	0	0
LOC100129138	0	0	0	0	0	2	0	2	0	0	0	4	0	0	0	0	0	0	0	0	4	2	8	0
LINC01676	0	0	0	0	0	0	0	0	0	0	0	0	0	0	0	0	0	0	0	0	0	0	0	0
PRMT6	4270	4199	5026	2757	3792	3967	4210	3248	3284	3391	3738	2775	4269	3472	4003	2999	3532	3502	3296	3741	4556	4703	6058	4378
NTNG1	7	6	0	0	10	6	2	6	10	4	20	2	22	2	6	2	12	5	4	14	6	8	4	8
VAV3	426	364	553	283	331	400	398	381	283	381	425	329	551	290	382	314	377	332	282	371	576	607	655	501
MIR7852	0	0	0	0	0	0	0	0	0	0	0	0	0	0	0	0	0	0	0	0	0	0	0	0
VAV3-AS1	0	0	0	0	0	0	0	0	0	0	0	0	0	0	0	0	0	0	0	0	0	0	0	0
SLC25A24	3133	2839	3732	2009	3048	2754	2818	2462	2127	2602	2750	2226	3068	2466	2901	2290	2547	2271	2133	3039	4172	3979	4471	3393
NBPF4	0	0	0	0	0	0	0	0	0	0	0	0	0	0	0	0	0	0	0	0	0	0	0	0
NBPF6	0	0	0	0	0	0	0	0	0	0	0	0	0	0	0	0	0	0	0	0	0	0	0	0
EEIG2	2479	2073	2592	1620	2075	1938	2130	1929	1555	1861	2174	1409	2406	1733	2032	1729	2091	1689	1653	2453	3588	3499	4203	2840
HENMT1	0	0	0	0	0	0	0	0	0	0	0	0	0	0	0	0	0	0	0	0	0	0	0	0
PRPF38B	7934	6545	9503	5636	7296	7478	7398	6420	5786	6637	7108	6041	7521	6091	7282	5805	6931	6261	5900	7628	11146	11035	12739	9544
FNDC7	6	0	0	4	0	0	0	0	0	0	0	0	2	0	0	0	0	0	6	0	0	0	6	0
STXBP3	3282	2584	3641	2077	2731	3013	2699	2434	2139	2476	2986	1933	3312	2225	3056	2255	2941	2341	2145	2882	4188	4308	4939	3584
AKNAD1	0	1	2	0	0	0	0	0	0	0	0	0	0	5	0	0	0	2	0	0	2	0	2	0
SPATA42	0	0	0	0	0	0	0	0	0	0	0	0	0	0	0	0	0	0	0	0	0	0	0	0
GPSM2	1701	1615	1895	1168	1583	1687	1700	1453	1264	1308	1630	1369	1771	1391	1499	1334	1539	1482	1280	1481	2458	2177	2796	2395
CLCC1	3646	3433	4558	2583	4093	3458	3614	3185	3158	3335	3854	2725	4609	3419	4321	3302	3882	3646	3266	4009	6665	6389	7765	5836
WDR47	1347	1189	1624	977	1214	1307	1358	1067	1043	1176	1258	876	1639	1086	1245	1042	949	1214	1037	1375	1961	1994	2164	1695
TAF13	1054	1032	1361	805	995	1024	990	903	719	846	1209	786	1053	745	960	812	1030	774	789	1120	1631	1494	1991	1228
TMEM167B	1204	1115	1393	892	1115	1062	1129	1113	1119	1100	1056	901	1400	945	1272	1013	1171	980	906	1507	2203	1869	2187	1551
SCARNA2	25	27	18	12	17	4	9	19	8	7	32	2	8	28	27	18	16	10	21	26	22	22	10	16
CFAP276	2	6	10	12	0	9	4	5	8	12	2	3	4	10	1	8	6	0	0	0	3	6	4	2
ELAPOR1	0	4	0	0	10	20	10	1	12	13	3	10	0	2	0	0	4	4	1	0	0	18	6	10
SARS1	12400	10516	13915	8245	11646	11499	11754	9666	9508	9605	11451	8324	12028	9652	11218	8642	11007	9280	9381	10897	15530	15084	17260	13409
CELSR2	3447	2760	3112	1851	2690	2602	2578	1997	2047	2339	2398	1572	2357	2103	2433	1586	2127	2100	2093	2162	2868	3006	3450	2796
PSRC1	2580	2397	2699	1695	2026	2420	2202	1880	1861	2083	2460	1634	2369	2043	2525	1690	2182	2027	2029	2195	3214	3063	3517	2777
MYBPHL	0	0	0	0	3	0	0	0	6	0	0	0	0	0	0	0	0	0	0	0	0	0	0	0
SORT1	5877	4770	6273	3671	4894	5005	4657	4158	3496	4405	4716	3618	5352	3868	4869	3486	3982	3956	3714	5316	6727	6753	7600	5897
PSMA5	8326	7010	9370	5199	7300	7049	7364	6093	6493	6321	6909	5148	7807	5826	7254	5683	7287	5889	5634	7358	9720	10025	11596	9067
SYPL2	691	648	902	556	756	810	768	660	611	587	792	563	799	547	751	611	665	567	553	605	1012	1006	1120	975
ATXN7L2	791	794	708	499	626	828	708	535	741	674	715	574	688	642	779	640	866	745	615	718	1000	934	1056	847
CYB561D1	604	632	762	505	693	662	703	580	551	693	724	463	543	584	672	514	666	566	547	591	824	791	942	688
AMIGO1	743	619	927	469	673	670	633	542	550	601	689	505	690	539	652	417	565	548	559	675	776	867	869	679
GPR61	0	0	10	0	14	8	2	6	0	16	10	8	0	0	0	2	8	23	4	0	15	4	12	6
GNAI3	7853	7138	9184	5313	7583	6868	7118	6022	5533	6269	7445	5410	7541	6025	7182	5431	6852	5516	5427	7282	10940	10576	12128	9225
MIR197	3	1	3	1	2	6	2	1	0	0	0	8	0	6	0	0	0	0	0	2	2	5	5	5
GNAT2	41	51	56	42	35	47	58	55	49	34	34	54	43	41	45	39	23	57	34	79	119	99	90	54
AMPD2	4620	4645	5323	3060	4413	4548	4665	4051	3909	3878	4467	3169	4530	3727	4763	3341	4290	3985	3679	3862	5715	5478	6174	4975
GSTM4	241	258	308	181	258	282	274	165	281	221	257	224	270	250	349	183	318	202	160	142	322	366	345	292
GSTM2	658	630	769	534	618	619	738	563	737	515	528	357	657	601	798	476	534	622	485	666	750	866	883	787
GSTM1	4	7	11	3	8	5	7	9	9	3	7	1	7	11	6	4	11	13	7	1	6	6	6	7
GSTM5	0	0	0	0	0	0	0	0	0	2	0	0	0	0	0	0	0	0	0	0	0	0	0	0
GSTM3	2342	1969	2309	1300	2008	1959	1908	1603	1636	1779	2015	1297	2353	1705	1832	1294	2080	1680	1715	1982	2790	2549	2965	2446
EPS8L3	0	0	0	0	0	0	0	0	0	0	0	0	0	0	0	0	0	0	0	0	0	0	0	0
CSF1	241	354	301	215	331	280	282	221	248	267	307	248	362	253	420	254	198	224	321	329	328	445	439	390
AHCYL1	10118	8587	10314	6417	8344	8505	9034	7299	6988	8051	8515	6036	9744	7138	8780	6389	7794	7050	6963	9030	11684	11567	13651	9989
STRIP1	3074	2474	3501	1826	2820	2840	2800	2257	2152	2374	2715	1933	2856	2187	2638	1933	2446	2119	2248	2708	3464	3356	3962	3053
ALX3	223	211	215	158	208	227	220	163	156	163	204	155	163	125	197	148	207	177	143	138	274	243	243	178
LINC01397	0	8	6	6	0	12	12	7	9	8	17	2	8	2	0	0	2	2	0	0	14	7	8	5
UBL4B	7	0	14	2	0	0	0	2	0	6	0	2	5	0	1	8	0	2	0	0	17	10	0	8
SLC6A17	93	83	98	54	44	65	74	59	59	60	122	48	114	92	75	64	93	46	77	60	96	66	126	83
KCNC4-DT	31	19	62	31	8	25	31	14	14	15	35	16	29	49	26	19	31	19	35	28	17	30	38	34
KCNC4	1032	931	1192	648	881	1025	914	821	829	997	873	693	929	744	980	689	808	899	819	864	1081	1058	1279	1069
RBM15-AS1	77	57	47	48	77	77	77	22	43	63	107	81	99	46	75	90	74	48	64	81	68	104	115	86
RBM15	2825	2718	3470	1932	2535	2804	2636	2214	2041	2551	2633	2068	2890	2195	2665	1975	2286	2258	2254	2659	4170	4112	4632	3620
SLC16A4	68	67	115	64	64	78	73	101	56	64	47	40	32	62	106	82	77	60	97	72	101	142	119	68
LAMTOR5	3197	2711	3579	2118	2824	2766	2856	2150	2166	2401	2734	2070	3163	2483	2610	2182	2898	2319	2086	2566	3931	4018	4614	3468
LAMTOR5-AS1	5	5	23	18	18	22	9	22	8	12	7	6	20	14	16	28	3	9	11	20	20	24	17	26
PROK1	10	8	2	2	3	0	0	4	0	0	2	4	0	8	6	0	0	4	2	9	12	2	0	2
CYMP	0	0	0	0	0	0	0	0	0	0	0	0	0	0	0	0	0	0	0	20	0	0	0	0
CYMP-AS1	0	0	0	0	0	0	0	0	0	0	0	0	0	0	0	0	0	2	0	0	0	0	0	0
KCNA10	0	0	0	0	0	0	0	0	0	0	0	0	0	0	0	0	0	0	0	0	0	0	0	0
KCNA2	14	16	10	12	4	10	16	22	24	18	38	10	12	8	19	26	6	33	16	0	9	22	32	20
KCNA3	128	150	100	85	77	119	96	104	132	101	134	88	149	166	134	127	163	156	84	199	153	168	279	174
CD53	0	0	0	2	0	0	0	0	0	0	0	0	0	2	0	0	0	0	0	0	0	0	0	0
LRIF1	1295	1096	1482	866	1133	1227	1208	1186	938	1101	1388	869	1315	1025	1160	1098	1078	943	962	1460	1819	1853	2225	1705
DRAM2	2063	1729	2238	1241	1758	1719	1875	1372	1297	1490	1503	1228	2131	1361	1488	1245	1712	1404	1271	1843	2599	2642	2795	2301
CEPT1	3004	2765	3153	2031	2889	2953	2882	2331	2248	2684	2918	2385	3376	2613	2943	2365	2991	2605	2329	2872	4660	4243	5201	3939
DENND2D	13	4	10	0	0	9	2	0	11	2	4	4	0	10	11	0	0	0	0	15	18	10	2	13
CHI3L2	0	0	0	0	0	0	0	0	0	0	0	0	0	0	0	0	0	4	0	0	0	0	0	0
CHIAP2	0	0	0	0	0	0	0	0	0	0	0	0	0	0	0	0	0	0	0	0	0	0	0	0
CHIA	0	0	0	0	0	0	0	0	0	0	0	3	0	0	0	0	0	0	0	0	0	0	0	4
CIMAP3	4	18	34	9	14	10	12	12	20	20	10	6	34	18	11	10	27	15	15	20	38	24	40	12
PGBP	0	0	0	0	0	0	0	0	0	0	0	0	0	0	4	4	2	0	2	0	4	0	0	0
OVGP1	95	92	91	60	79	80	94	90	56	103	122	53	49	74	89	61	90	76	93	102	120	161	129	107
WDR77	15348	13081	17450	9979	13991	14234	14565	11691	11767	12498	14101	10037	15895	11843	14574	10837	14676	11957	11607	13350	19304	18342	21328	17134
ATP5PB	18208	14820	20111	11201	16081	15458	16469	13050	13047	14019	15330	11162	17211	12924	16189	12255	16092	12446	11830	16287	23339	22467	25339	20134
C1orf162	28	13	19	17	18	26	48	17	13	28	8	5	29	39	14	6	12	20	7	6	36	29	51	5
TMIGD3	0	0	0	0	0	0	0	0	0	0	0	0	0	0	0	0	0	0	0	0	0	0	0	0
ADORA3	0	0	0	0	0	0	0	0	0	0	0	0	0	0	0	0	0	0	0	0	0	0	0	0
LINC01160	6	0	7	11	12	0	0	2	0	6	6	10	0	0	20	0	2	0	4	8	12	0	4	4
RAP1A	4429	3575	4984	2518	3914	3783	3917	3250	2873	3264	3735	2937	4257	2830	3843	2695	3548	2968	2829	3715	5395	5516	6714	5017
INKA2	215	249	311	182	177	341	292	143	254	186	192	193	265	143	187	133	166	243	212	142	264	281	365	259
INKA2-AS1	6	10	12	2	0	0	7	1	1	4	14	0	7	0	7	8	4	1	10	24	8	7	7	5
LOC101928718	6	0	0	3	0	1	2	1	1	0	0	0	8	2	2	0	8	0	0	0	9	9	6	2
DDX20	4801	3764	5213	2635	3999	3882	3961	3530	3257	3592	3856	3028	4411	3157	4084	3099	4015	3355	3149	4488	6111	5607	6962	5086
KCND3	8	11	0	24	12	2	0	14	20	18	12	15	11	6	12	10	12	7	4	8	2	10	38	10
KCND3-IT1	0	0	0	0	0	0	0	0	0	0	0	0	0	0	0	0	0	0	0	0	0	0	0	0
KCND3-AS1	0	0	0	0	0	0	0	0	0	0	0	0	0	0	0	0	0	0	0	0	0	0	0	0
LINC01750	0	0	0	1	10	15	0	0	0	0	0	0	0	0	0	0	0	0	2	0	0	2	2	0
CTTNBP2NL	1906	1805	2390	1336	1923	1838	1998	1562	1480	1659	1737	1348	2189	1624	1620	1393	1678	1546	1447	2003	2601	2599	3047	2323
MIR4256	0	0	0	0	0	0	0	0	0	0	0	0	0	2	0	0	0	0	0	0	2	0	0	0
WNT2B	71	24	48	48	88	86	58	56	35	32	64	33	84	46	61	80	53	64	45	60	123	104	60	75
ST7L	1184	868	1300	671	986	879	1060	858	870	950	1019	735	1189	834	1121	816	1077	894	843	1140	1481	1543	1783	1262
CAPZA1	14344	12706	16851	9618	12748	12668	13345	10592	10232	11339	11960	9933	13749	10577	13027	10458	12840	10377	9879	14410	19838	18577	21573	16461
MOV10	3681	3663	4627	2655	3546	3815	3752	3272	2959	3351	3738	2655	3958	3277	3671	2893	3401	3113	2845	3157	5241	4510	5613	3971
RHOC	2677	2250	2839	1515	2223	2224	2349	1917	1856	1850	2131	1519	2288	1670	2205	1696	2041	2079	1731	1952	2757	2629	3015	2409
PPM1J	182	217	330	117	213	260	257	161	219	249	264	137	230	160	244	121	235	195	171	229	260	281	215	201
TAFA3	0	10	14	8	0	0	0	2	1	0	0	10	4	10	0	0	1	4	0	0	6	2	0	4
LINC01356	12	16	9	11	10	12	16	12	10	12	17	12	17	21	16	15	8	10	8	8	8	0	30	13
SLC16A1	24970	22384	28691	16785	22731	23117	24256	19278	18084	20434	22133	17182	25932	19619	23727	18006	21883	19263	18453	24347	32505	30561	36186	28895
AKR7A2P1	24	6	5	12	8	23	10	12	12	16	13	19	4	25	22	5	12	17	5	4	15	0	11	35
SLC16A1-AS1	181	156	213	125	171	142	177	148	137	188	139	146	195	174	219	189	148	131	148	157	191	261	201	177
LRIG2-DT	14	16	26	17	6	4	8	12	14	10	10	2	0	4	12	14	4	8	5	30	38	33	8	15
LRIG2	1260	1165	1487	771	938	1293	1152	1054	1014	1050	1247	762	1206	958	1399	1003	1032	996	956	1333	1780	1523	1933	1567
LOC643441	0	0	0	0	0	0	0	0	0	0	0	0	0	0	0	0	0	0	0	0	0	0	0	0
MAGI3	3258	3107	3907	2354	3134	3316	3324	2781	2178	2654	3149	2304	3306	2520	3389	2323	2399	2706	2698	3174	4493	4238	5273	3973
PHTF1	1659	1520	2025	1120	1547	1335	1368	1186	1193	1353	1388	1011	1624	1151	1570	1140	1229	1200	1050	1569	2091	2091	2326	1675
RSBN1	2621	2249	3135	1644	2365	2339	2230	1974	1662	1932	1931	1776	2461	1952	2147	1764	2123	1781	1777	2875	3292	3331	3918	3146
AP4B1-AS1	42	22	47	11	21	22	16	3	27	14	10	4	19	39	14	7	34	28	11	47	39	11	46	52
PTPN22	0	0	0	0	0	1	2	0	0	0	0	0	0	2	0	0	12	0	0	0	0	0	0	0
BCL2L15	13	16	23	3	2	7	14	11	12	8	0	4	18	7	2	6	24	2	2	0	24	9	39	2
AP4B1	784	858	1128	560	719	823	662	731	707	687	923	580	1004	765	794	661	716	628	708	651	1188	1128	1277	953
DCLRE1B	2393	2049	3022	1610	2151	2131	2328	1829	1741	1739	2181	1501	2195	1848	2084	1727	2015	1856	1747	2244	2846	2759	3346	2677
HIPK1-AS1	1	1	24	3	28	1	11	4	6	1	0	1	0	6	0	3	0	3	2	0	4	4	11	8
HIPK1	7879	6859	8979	5230	8327	7576	7696	6292	5482	6680	7516	5371	8516	6160	7737	5965	6610	6307	6349	8068	10512	10252	11993	9519
OLFML3	4	18	0	12	0	8	20	5	12	5	0	0	6	2	6	8	7	8	0	1	8	20	4	8
SYT6	57	45	90	54	80	62	92	102	61	60	68	34	44	59	57	44	43	92	50	118	85	115	115	88
TRIM33	6912	6017	8334	4745	6142	6495	7076	5762	4830	5566	6420	4658	6685	5204	6613	5243	5511	5128	5134	6760	9152	9356	10436	7987
BCAS2	4296	3782	5638	3023	4359	4050	4099	3562	3327	3610	3945	3101	4498	3276	4223	3335	3972	3477	3523	4363	6042	5910	6882	5003
DENND2C	626	517	727	375	566	593	568	478	451	487	394	425	656	436	631	475	450	415	432	606	834	720	930	583
AMPD1	0	8	1	1	0	1	2	0	10	2	2	2	0	0	6	2	4	0	6	0	0	6	0	0
NRAS	11485	9883	13958	7609	10604	10477	10203	8865	7962	8995	10519	7599	11761	8986	10571	8011	9858	8590	7987	11309	15147	14360	17536	13600
CSDE1	69301	59237	80419	46075	61665	59552	62085	53566	48994	54610	59557	46026	68222	50792	62603	48452	55687	50851	47878	66049	90570	86475	103848	78749
SIKE1	6458	5630	7673	4502	5751	5646	6111	5352	4568	5664	6091	4566	6562	4993	6250	4686	5256	4965	4520	6782	10100	9849	11453	8811
SYCP1	0	0	0	0	0	0	0	0	0	0	0	0	0	0	0	0	0	0	0	0	0	0	0	0
TSHB	6	0	4	1	0	0	4	0	0	0	0	0	0	0	8	0	0	0	0	0	4	0	0	0
TSPAN2	198	140	234	113	155	198	126	110	122	201	240	103	184	130	184	174	211	136	124	236	236	181	283	162
NGF	0	0	2	20	0	4	4	2	0	8	0	0	0	0	6	2	4	4	2	0	13	22	16	0
VANGL1	3969	3599	4540	2606	3619	3607	3768	3323	2779	3307	4168	2859	4105	3403	3933	2800	3464	3006	3090	3842	5152	4907	6008	4625
CASQ2	0	0	10	0	0	0	0	0	0	0	0	0	2	0	0	0	0	0	0	0	2	0	10	0
NHLH2	63	38	64	37	21	45	87	58	46	95	85	7	45	39	94	42	51	73	55	54	28	53	114	70
LINC01649	0	0	2	0	0	0	0	0	0	0	0	0	0	0	0	0	0	0	0	0	0	0	0	0
LOC101928977	0	0	0	0	0	0	0	0	0	0	0	0	0	0	0	0	0	0	0	0	0	0	0	0
SLC22A15	302	223	228	176	270	247	203	201	210	210	276	203	225	192	232	144	214	292	178	381	329	428	461	250
MAB21L3	4	0	4	14	0	8	14	4	0	6	0	1	0	0	2	4	0	8	2	8	0	0	4	0
ATP1A1	47903	42716	54326	30336	41965	44905	45119	36285	35738	36886	43190	31531	46479	36517	43487	33003	39916	37780	37399	43456	55368	55277	66138	52391
ATP1A1-AS1	107	67	109	64	62	86	92	81	62	91	76	52	70	55	72	37	111	49	63	57	143	97	131	102
LINC01762	0	0	0	4	0	0	0	0	0	0	7	0	11	0	0	0	0	0	0	0	0	2	12	1
CD58	380	262	402	214	195	249	288	189	267	249	299	184	318	283	223	264	241	198	229	288	433	397	429	343
MIR548AC	1	0	6	1	0	1	0	1	0	2	0	0	2	0	0	0	1	2	0	0	0	0	0	0
IGSF3	3301	2986	3401	2115	2820	3054	3114	2516	2245	2351	2813	1918	3268	2326	2878	1985	2472	2256	2158	2580	3422	3632	4162	3199
MIR320B1	0	0	0	0	0	0	0	0	0	0	0	0	0	0	0	0	0	0	0	0	0	0	0	0
LINC02868	0	0	0	0	0	0	0	0	0	0	0	0	0	0	0	0	0	0	0	0	0	0	0	0
CD2	0	0	0	0	0	0	0	0	0	0	0	0	0	0	0	0	0	0	0	0	0	0	0	0
PTGFRN	5798	5042	7204	3886	5149	5206	5611	4744	4487	4499	5345	3643	5502	4483	5612	4266	4783	4504	4685	5088	7462	7487	8388	6639
CD101	142	127	145	95	118	155	107	131	124	179	107	167	154	117	95	111	99	102	85	212	197	206	198	149
CD101-AS1	15	10	35	11	22	3	21	8	21	17	14	25	2	22	27	9	6	12	19	17	39	20	33	34
TTF2	7068	6306	8382	4800	6389	6576	6731	5779	5489	5687	6105	4568	7317	5791	7014	4948	5778	5142	5350	6882	9411	9849	10718	7425
MIR942	0	0	0	0	0	0	0	0	0	0	0	0	0	0	0	0	0	0	0	14	0	0	3	0
TRIM45	565	567	679	353	536	548	552	527	402	587	613	433	645	469	551	388	541	486	481	370	791	746	1016	633
VTCN1	0	0	0	0	0	0	0	0	0	0	0	0	0	2	0	0	0	0	0	0	0	4	4	0
LINC01525	0	0	0	0	0	0	0	0	0	0	0	0	0	0	0	0	0	0	0	0	0	0	0	0
MAN1A2	5229	4530	6276	3599	4592	5062	4915	4079	3230	4334	4881	3828	5164	4521	4887	4013	4220	4300	4014	5382	8529	7918	8737	7032
TENT5C-DT	0	0	0	0	0	0	0	0	0	0	0	0	0	0	0	0	0	0	0	0	0	0	0	0
TENT5C	560	477	670	441	483	631	514	466	453	352	637	379	654	350	526	327	595	515	368	698	805	772	1136	789
GDAP2	1518	1383	2103	1015	1588	1596	1648	1344	1197	1523	1370	1163	1765	1583	1535	1344	1443	1271	1162	1685	2401	2181	2461	1878
WDR3	10522	9323	12480	6823	9952	9798	10285	8718	8060	8845	9929	7373	10816	8356	9884	7762	9019	7987	8044	10919	14075	14061	16118	12136
SPAG17	23	24	21	27	14	23	27	22	9	20	44	25	9	55	18	1	22	4	6	18	10	37	44	31
TBX15	18	12	11	0	6	16	14	30	1	0	10	8	10	8	23	0	0	0	5	10	8	8	16	18
WARS2	2203	1617	2291	1292	1696	1725	1913	1583	1383	1623	1847	1336	1827	1470	1836	1413	1527	1381	1408	1577	2661	2290	2913	2008
WARS2-IT1	0	2	1	0	0	0	0	0	0	0	0	0	4	0	0	0	0	0	0	0	0	0	2	0
WARS2-AS1	807	904	961	515	806	777	883	733	645	697	691	577	732	585	821	515	703	591	617	808	1288	1165	1421	1111
HAO2	4	4	2	2	0	4	4	5	2	1	8	2	0	2	0	1	0	0	0	0	2	0	16	0
HAO2-IT1	0	0	0	0	0	0	0	0	0	0	0	0	0	0	0	0	0	0	0	0	0	0	0	0
HSD3B2	3	0	0	4	0	0	0	0	0	0	0	0	2	0	0	0	10	0	0	0	5	0	1	0
HSD3B1	0	0	2	0	0	0	0	0	0	0	0	0	0	0	0	0	0	0	0	0	0	0	0	0
HSD3BP4	2	7	16	0	0	2	3	12	0	2	0	0	0	0	2	4	2	8	4	18	14	4	0	1
LINC00622	15	10	32	16	16	20	32	16	28	53	17	20	26	14	16	24	16	24	31	54	18	21	47	68
ZNF697	1189	1041	1476	734	1239	1143	1262	1170	924	1006	1191	871	1259	1157	1207	819	1207	1098	1068	1374	1703	1730	1865	1454
PHGDH	25475	23521	29247	17150	23324	24189	25297	20356	20405	20977	23380	18229	26650	20803	24607	17559	23866	21126	20248	20587	29795	28807	34504	27612
HMGCS2	0	0	0	6	1	0	0	1	0	0	1	0	0	0	2	0	0	0	0	0	0	0	0	0
REG4	0	2	4	6	0	0	0	0	0	0	0	0	0	0	0	0	0	8	2	4	12	0	0	2
NBPF7P	0	0	4	0	0	0	0	0	0	0	0	2	0	0	0	0	0	0	0	0	0	0	0	0
ADAM30	0	0	0	0	0	0	0	0	0	0	0	0	0	0	0	0	0	0	0	0	0	0	4	0
NOTCH2	21166	19077	24080	13726	20272	19707	20091	17315	13843	17444	17854	14064	19904	16283	19768	14337	14632	15671	15904	20625	25738	25234	29160	22663
SEC22B	3837	3417	4720	2594	3596	3531	3596	3077	3016	2828	3575	2789	3925	3155	4046	3016	3737	3255	3026	3368	5746	5546	6031	4679
	24	20	24	12	15	18	19	6	13	11	2	21	22	20	25	18	32	14	15	25	25	13	23	11
NBPF8	1052	1015	1186	822	994	1094	947	973	924	1010	1024	827	853	695	967	828	849	953	840	1182	1405	1804	1732	1256
PFN1P2	63	16	67	46	51	71	36	30	36	45	56	23	25	28	50	24	41	41	73	36	48	46	57	22
PDE4DIPP2	250	278	376	231	214	292	275	282	212	342	266	227	310	242	357	221	232	300	277	301	481	438	456	438
NOTCH2NLR	8	0	0	2	12	2	4	0	0	2	0	2	2	0	4	6	0	0	2	1	0	0	6	4
NBPF26	322	259	378	286	376	270	286	335	215	262	342	178	218	245	267	252	269	233	208	358	593	474	556	464
TRN-GTT2-1	0	0	1	0	0	0	0	0	1	0	0	0	0	0	1	0	0	0	2	0	0	1	4	0
RNVU1-19	0	0	0	0	0	0	0	0	0	0	0	0	0	0	0	0	0	0	0	0	0	0	0	0
PPIAL4A	6	4	6	2	8	2	4	2	6	0	0	8	0	4	6	1	0	2	0	0	4	0	1	4
LINC00623	210	159	241	151	185	151	172	162	181	158	222	91	195	198	196	151	129	149	154	170	263	234	273	221
RNVU1-4	0	0	0	0	0	5	0	0	2	0	0	4	0	0	0	0	0	0	0	2	6	0	6	0
TRN-GTT11-2	0	0	0	0	0	0	0	0	0	0	0	0	0	0	0	1	0	0	0	0	0	3	0	1
LOC105369199	0	0	5	0	1	1	2	5	0	0	6	0	0	2	6	2	3	0	0	0	1	8	0	1
	0	0	0	0	0	0	0	0	0	0	0	0	0	0	0	0	0	0	0	0	0	0	0	0
	0	2	2	0	0	0	0	0	0	0	0	0	0	0	0	0	0	0	0	0	0	0	0	0
PDE4DIPP4	0	0	0	0	0	0	0	0	0	0	0	0	0	0	0	0	0	0	0	0	0	0	0	0
FCGR1BP	0	0	0	2	0	2	0	0	0	0	0	0	0	0	0	2	0	0	0	0	0	0	2	0
LOC100996318	0	0	20	0	0	1	0	0	4	0	0	6	0	2	6	0	2	2	5	0	4	2	0	21
H2BP1	0	0	0	0	0	2	1	0	2	0	0	0	3	0	0	1	0	0	0	0	2	0	0	4
FAM72B	1240	1000	1273	836	1141	1133	1178	937	988	1162	1261	910	1209	885	1275	870	1246	935	942	1110	1702	1635	1780	1434
SRGAP2C	1391	1130	1463	800	1179	1279	1291	1098	1007	1185	1126	893	1350	1077	1270	1029	1052	1041	1015	1347	1807	1721	2023	1536
SRGAP2-AS1	0	0	0	0	1	0	0	0	0	0	0	0	0	3	0	1	0	0	0	12	0	0	2	2
EMBP1	58	49	89	41	67	61	52	42	32	69	43	32	30	43	40	55	39	25	37	110	82	38	84	48
LOC101929815	0	0	0	0	0	0	2	0	0	0	0	0	0	0	2	0	0	0	0	0	0	0	0	0
TRQ-CTG4-2	0	0	0	0	0	0	0	0	0	0	0	0	0	0	0	0	0	0	0	0	0	0	0	0
RNVU1-17	0	0	0	0	0	0	0	0	0	0	0	0	0	0	0	0	0	0	0	0	0	0	0	0
RNVU1-18	0	0	8	0	0	0	0	0	0	0	0	0	0	0	2	0	0	0	0	0	1	0	4	0
TRN-GTT6-1	0	0	0	0	0	0	0	0	0	0	0	0	0	0	0	0	0	0	0	0	0	0	1	0
LOC105369140	0	0	30	4	0	4	8	10	0	6	0	7	9	4	6	0	0	6	4	0	0	0	7	0
LINC02591	0	0	0	0	0	0	0	0	0	0	0	0	0	0	0	0	0	0	0	0	0	6	0	0
TRV-CAC8-1	0	0	0	0	0	0	0	0	0	0	0	0	0	0	0	0	0	0	0	0	0	0	0	0
TRV-CAC4-1	0	0	0	0	0	0	0	0	0	0	0	0	0	0	0	0	0	0	0	0	0	0	0	0
PDE4DIPP3	0	0	0	0	0	0	0	1	0	0	0	0	0	0	0	0	0	4	0	0	0	0	0	0
TRN-GTT12-1	0	0	0	0	0	0	0	0	0	0	0	0	0	0	0	0	0	0	0	0	0	0	0	0
FCGR1CP	0	0	0	0	0	0	0	0	0	0	0	0	0	0	0	0	0	0	0	0	0	0	0	0
	0	8	0	0	0	1	0	0	0	0	0	0	0	0	0	2	0	2	2	0	0	3	0	0
FAM72C	256	189	362	198	245	222	197	177	187	149	236	208	248	178	193	211	232	158	128	112	340	319	397	330
SRGAP2D	238	124	242	128	180	171	234	150	144	193	226	90	202	190	282	168	118	192	166	154	240	215	242	197
LOC101060524	0	0	0	0	0	0	0	0	0	0	0	0	0	0	0	0	0	0	0	0	0	0	0	0
PPIAL4E	0	0	0	0	0	0	0	0	0	0	0	0	0	0	1	0	0	0	1	0	0	0	0	0
RNVU1-15	10	5	5	9	3	0	7	9	2	0	0	0	9	1	3	0	0	5	0	0	6	5	6	4
TRN-GTT3-1	2	6	0	2	0	3	0	0	3	0	5	1	5	0	0	1	0	3	6	0	1	4	0	10
NBPF15	2063	1899	2197	1401	2032	2201	1766	1755	1523	1858	2137	1341	2324	1737	2037	1539	1623	1701	1427	1952	3110	2928	3276	2232
TRN-GTT2-8	0	0	0	0	0	0	0	0	0	0	0	0	0	0	0	0	0	0	0	0	0	0	0	0
PPIAL4F	0	0	0	0	0	0	0	0	0	2	0	0	6	0	1	0	0	0	0	0	2	1	0	0
LOC105371215	0	0	0	0	0	0	0	0	0	0	0	0	0	0	0	0	0	0	0	0	0	0	0	0
DRD5P2	0	0	0	0	0	0	0	0	0	0	0	0	0	0	0	0	0	0	0	0	0	0	0	0
LSP1P5	5	0	0	4	0	6	0	0	0	0	0	0	0	8	0	0	2	1	0	0	0	0	0	0
SRGAP2B	548	380	521	318	531	430	449	425	381	406	426	353	568	407	387	331	499	399	420	415	643	551	685	536
FAM72D	587	432	702	417	575	456	479	488	527	581	495	483	625	503	508	380	512	509	379	628	817	779	826	670
LOC101929805	0	0	0	0	4	0	0	0	0	0	0	0	0	0	0	0	0	2	0	0	6	0	11	0
	22	20	10	2	20	3	14	8	12	14	20	4	28	2	10	10	10	12	26	46	28	40	14	27
LINC01145	96	57	113	58	50	104	67	44	51	72	29	53	44	27	49	60	50	39	54	8	105	48	90	69
PPIAL4D	0	0	0	0	0	2	0	0	0	0	0	0	0	0	0	0	0	0	0	0	0	0	0	0
RNVU1-14	0	0	0	1	8	2	6	4	0	4	10	0	5	15	0	0	1	1	4	20	11	6	7	22
TRN-GTT2-7	0	0	0	1	0	0	3	0	0	0	0	0	0	0	0	0	0	0	0	0	0	0	1	0
NBPF20	440	343	597	271	418	406	398	418	385	454	392	265	409	299	340	329	434	285	282	389	557	639	701	405
	0	0	0	0	0	0	0	0	0	0	0	0	0	0	0	0	0	0	0	0	0	0	0	0
PDE4DIPP5	0	4	0	6	6	0	2	1	1	0	0	0	0	0	0	0	0	0	2	0	10	0	2	6
NBPF25P	71	61	74	64	66	48	45	32	98	97	52	45	61	45	87	57	61	57	68	66	74	136	120	66
GPR89A	498	403	572	265	412	450	465	424	421	467	497	291	491	394	451	329	421	402	326	393	645	742	813	599
PDZK1	30	41	43	23	17	29	26	27	14	37	17	7	42	23	23	22	8	15	20	22	37	72	64	53
CD160	34	22	33	3	32	12	22	18	12	34	11	29	14	9	27	30	17	26	21	46	37	25	46	16
RNF115	1737	1710	2195	1116	1371	1636	1847	1394	1519	1380	1563	1078	1714	1397	1685	1388	1388	1384	1233	1455	2344	2305	2765	1798
POLR3C	3136	2892	3813	2105	3025	2938	3038	2414	2710	2554	2709	1973	3376	2550	3333	2483	2905	2577	2382	3325	4208	3996	4607	3383
NUDT17	144	161	196	115	119	230	157	147	180	154	165	87	197	128	163	132	127	118	144	118	211	197	211	187
PIAS3	2346	2029	2788	1432	2260	2371	2462	2006	1994	2028	2279	1555	2313	2005	2384	1757	2029	2005	2071	2687	3025	2856	3795	2784
MIR6736	0	0	0	0	0	0	0	0	0	0	0	0	0	2	0	0	0	0	0	0	0	0	0	0
ANKRD35	0	1	0	0	12	0	0	0	0	2	0	0	0	0	0	0	0	0	0	0	0	0	0	2
ITGA10	39	43	41	21	37	66	39	47	35	34	38	28	51	59	57	28	71	28	37	14	57	55	45	18
PEX11B	728	686	1369	621	779	825	828	730	638	695	824	673	825	738	865	636	914	679	643	894	1123	1065	1139	876
GNRHR2	59	40	39	21	18	22	23	23	17	23	29	2	9	24	9	42	10	36	26	37	32	34	27	25
RBM8A	9100	8163	11372	6058	8538	8703	9004	7008	7273	7359	8792	6247	8985	7082	8253	6274	8281	7592	7032	8314	11616	12011	14089	10372
LIX1L	3906	3350	4247	2408	3683	3376	3631	2719	2667	2976	3426	2521	4147	2903	3438	2491	3244	2966	2783	3350	5592	5366	6705	5036
POLR3GL	810	628	1045	586	584	807	768	734	679	692	820	414	883	636	892	676	799	723	664	762	1172	1105	1148	960
ANKRD34A	374	300	384	243	264	372	282	217	209	192	336	249	383	301	425	221	226	342	266	269	425	406	406	395
TXNIP	1253	1279	1455	946	1258	1095	1351	1051	1041	1105	1112	988	1189	1246	1307	904	1156	993	953	1320	1787	1824	1988	1468
HJV	0	0	0	0	0	0	0	0	0	1	0	0	0	0	0	0	0	0	0	0	0	0	0	2
TRE-CTC1-1	0	0	0	0	0	0	0	0	0	0	0	0	0	0	0	0	0	0	0	0	0	0	0	0
TRG-TCC2-1	0	0	0	0	0	0	0	0	0	0	0	0	0	0	0	0	0	0	0	0	0	0	0	0
TRH-GTG1-1	0	0	0	0	0	0	0	0	0	0	0	0	0	0	0	0	0	0	0	0	0	0	0	0
TRK-CTT2-1	0	0	0	0	0	0	0	0	0	0	0	0	0	0	0	0	0	0	0	0	0	0	0	0
RNVU1-6	4	0	0	3	0	0	4	2	0	0	0	0	0	0	0	0	0	0	1	0	0	14	7	0
LINC01719	151	143	179	72	119	124	125	87	84	83	114	77	176	83	107	62	119	93	80	89	187	222	191	173
NBPF10	185	145	187	116	166	143	139	135	119	114	95	140	149	98	125	140	134	114	98	163	175	179	197	175
NOTCH2NLA	161	115	129	87	160	149	187	163	84	116	74	122	136	146	173	100	149	177	136	157	162	124	223	162
NUDT4P2	0	0	3	2	3	0	2	0	1	2	1	4	0	0	0	0	0	0	10	0	0	2	2	0
PPIAL4H	0	0	0	0	0	0	0	0	0	0	0	0	0	0	0	0	0	0	0	0	0	0	0	0
	0	0	0	0	0	0	0	0	1	0	0	0	0	0	0	0	0	0	0	0	0	0	0	0
HYDIN2	0	0	1	4	0	0	0	0	2	0	6	0	0	0	0	0	0	0	2	0	0	0	0	0
	10	9	7	8	16	6	14	14	6	7	10	0	8	1	8	8	12	6	8	0	2	9	5	9
NBPF12	789	741	963	588	752	806	833	647	703	609	681	493	890	548	676	590	624	587	481	830	1345	1106	1061	729
LOC728989	0	3	6	2	14	4	0	2	0	0	0	2	0	0	0	0	2	0	0	5	12	0	0	0
TRH-GTG1-2	0	0	0	0	0	0	0	0	0	0	0	0	0	0	0	0	0	0	0	0	0	0	0	0
RNVU1-8	0	0	0	0	8	0	0	0	1	0	0	0	0	0	0	4	0	0	0	0	0	0	0	0
NBPF13P	8	2	2	0	0	0	0	0	2	0	1	0	0	0	0	1	1	2	0	0	1	0	0	0
PRKAB2	2725	2428	3482	1859	2551	2597	2512	2242	2025	2374	2747	1914	3004	2125	2867	2211	2514	2119	2135	2945	3753	3879	4769	3058
PDIA3P1	2544	2339	2935	1608	2473	2498	2416	2010	1942	2082	2268	1740	2707	2124	2651	2116	2622	2122	2103	2723	3665	3842	4226	3136
FMO5	169	237	204	121	137	162	173	137	130	151	119	96	164	157	160	157	160	173	160	182	198	147	208	217
CHD1L	5395	4958	6794	3910	4700	4858	5280	4413	4365	4591	4907	3599	5134	4108	5127	3948	4540	4258	3994	4795	7155	7095	8546	6076
LINC00624	0	4	5	1	4	3	0	0	0	20	4	2	0	4	6	8	9	8	7	8	14	10	23	10
BCL9	3917	3277	4336	2590	3331	3503	3684	3109	2843	3229	3317	2519	3733	3076	3520	2463	2981	3002	3176	3304	4846	4393	5396	4065
ACP6	1086	1264	1726	895	1311	1278	1227	1065	1147	1188	1229	731	1432	1129	1371	986	948	1110	933	1131	1780	1639	1812	1313
GJA5	26	4	0	2	2	12	14	0	12	12	12	6	5	6	0	4	4	10	6	11	8	12	10	4
GJA8	0	2	6	2	0	0	14	6	10	2	0	0	2	2	2	6	0	2	4	0	0	2	9	6
GPR89B	240	281	337	259	229	310	294	246	186	246	217	208	278	204	342	238	167	184	253	230	415	469	421	280
PDZK1P1	13	16	16	6	0	12	33	32	9	18	0	1	13	11	19	10	17	2	17	13	26	13	37	22
TRQ-CTG3-2	0	0	0	0	0	0	0	0	0	0	0	0	0	0	0	0	0	0	0	0	0	0	0	0
RNVU1-7	6	1	6	0	0	0	1	0	0	0	1	2	0	0	0	0	4	0	3	0	0	0	4	2
TRN-GTT9-2	0	0	0	0	0	0	0	0	0	0	0	0	0	0	0	0	0	0	0	0	0	0	0	0
NBPF11	754	732	962	635	670	825	643	724	710	808	767	506	816	685	698	509	695	559	571	563	1221	1119	1137	819
LOC101927468	0	0	0	0	0	0	0	0	0	0	0	0	0	0	0	0	0	0	0	0	0	0	0	0
TRQ-CTG4-1	0	0	0	2	0	0	0	0	0	0	0	0	0	0	2	8	0	2	2	0	0	1	3	0
TRH-GTG1-3	0	0	0	0	0	0	0	0	0	0	0	0	0	0	0	0	0	0	0	0	0	0	0	0
TRH-GTG1-4	0	0	0	0	0	0	0	0	0	0	0	0	0	0	0	0	0	0	0	0	0	0	0	0
TRQ-CTG7-1	0	2	0	0	0	0	0	0	0	0	0	0	0	0	0	0	0	0	0	0	0	0	0	0
MIR5087	5	1	0	0	4	1	4	0	0	0	0	0	0	0	0	0	3	1	1	10	3	2	0	2
RNVU1-1	4	12	4	5	0	0	8	0	0	0	0	2	4	8	0	2	0	0	2	0	2	2	3	9
MIR6077	0	0	0	0	0	0	0	0	0	0	0	0	3	0	0	0	0	0	0	0	0	0	0	0
RNVU1-2	0	0	0	0	0	0	0	0	0	0	0	0	3	0	0	0	0	0	0	0	2	0	0	0
PDE4DIPP6	17	24	47	10	29	32	30	19	27	39	38	14	25	39	36	36	22	52	43	30	56	53	59	35
RNVU1-3	0	10	0	0	0	4	0	0	0	0	0	0	0	0	0	0	0	0	0	0	0	0	6	2
LINC01138	251	204	332	180	275	288	230	206	167	140	277	114	202	209	280	161	251	202	178	292	376	426	342	291
PPIAL4G	1	0	0	0	4	0	1	0	5	1	0	0	0	0	0	0	1	4	0	0	0	0	0	0
NBPF14	453	405	581	294	555	401	424	327	373	383	311	295	482	340	446	310	265	367	321	505	601	586	597	481
NOTCH2NLB	193	149	168	82	129	142	172	161	116	154	141	113	174	118	186	180	77	116	130	89	196	192	174	136
NUDT4B	1	0	0	0	4	0	2	0	0	2	0	1	0	7	0	0	0	2	3	0	0	1	0	0
PDE4DIP	4754	4087	5420	3090	4421	4661	4732	4088	3625	4142	4905	3740	5239	4206	5155	3987	4770	4607	4065	5190	6872	6547	8523	6342
NBPF9	1346	1227	1742	886	1473	1505	1461	1255	948	1218	1391	1009	1194	997	1203	1136	1172	1102	964	1432	2134	2168	2266	1542
LOC653513	22	4	2	8	1	17	7	6	4	2	1	10	0	8	2	1	10	2	3	0	7	6	3	14
	6	1	0	0	1	0	0	0	0	0	0	0	0	0	0	0	0	0	0	0	1	0	0	0
NBPF19	444	375	635	365	536	452	480	427	503	496	407	405	446	360	494	338	457	400	332	539	740	746	707	601
PPIAL4C	0	0	0	0	0	0	1	0	0	4	0	0	0	0	0	0	0	0	2	0	4	2	1	0
LINC00869	154	146	219	143	114	198	179	151	148	167	227	171	234	141	213	114	223	193	158	214	263	289	310	251
LOC644634	0	0	0	0	0	0	0	0	0	0	0	0	0	0	0	0	0	0	0	0	0	0	0	0
TRV-CAC1-7	0	0	0	0	0	0	0	0	0	0	0	0	0	0	0	0	0	0	0	0	0	0	0	0
PDE4DIPP7	0	0	0	0	0	0	0	0	0	0	0	0	0	0	0	0	1	0	0	0	0	0	2	0
TRN-GTT8-1	0	0	0	0	0	0	0	0	0	0	0	0	0	0	0	0	0	0	0	0	0	0	0	0
H2BC18	139	187	173	65	124	121	103	60	44	74	117	93	154	123	105	76	129	70	112	58	298	246	233	182
FCGR1A	2	4	2	0	0	12	2	4	6	2	0	0	6	10	1	2	0	2	0	9	0	4	0	0
	4	0	0	3	2	0	2	0	0	6	0	0	0	0	0	0	2	2	4	6	7	6	2	2
H3C13	42	26	14	6	34	22	3	14	2	8	13	4	23	11	8	4	20	5	10	2	39	24	11	15
H4C14	0	4	6	0	0	2	0	0	0	0	0	0	0	0	6	0	0	0	0	0	0	0	0	3
	4	2	0	0	0	6	0	1	2	0	4	2	0	0	4	2	0	0	0	0	4	4	0	0
H3C14	0	0	0	0	4	0	3	0	0	2	0	0	0	0	1	0	0	1	0	0	0	0	3	1
H2AC18	8	20	4	6	16	8	1	4	7	2	8	13	11	6	1	3	15	4	2	16	4	4	7	11
H2BC20P	8	27	14	6	49	17	27	25	10	14	16	22	16	25	53	17	16	21	15	0	24	11	17	10
H2AC19	1	6	0	0	1	2	3	5	3	1	2	3	5	5	2	1	4	5	4	1	2	4	4	6
H3C15	6	0	0	0	0	0	0	0	0	0	0	0	0	0	0	0	2	0	0	0	0	0	0	0
H4C15	8	0	0	0	0	0	2	0	0	0	0	0	0	0	0	0	1	2	0	0	0	2	0	0
H2BC21	168	197	102	117	173	166	139	106	100	181	159	96	144	116	165	132	123	91	173	97	209	275	283	174
H2AC20	37	51	47	21	63	53	66	48	45	59	60	35	78	33	44	40	41	63	61	32	105	100	101	80
H2AC21	2	20	16	0	0	4	4	2	4	0	4	8	8	30	0	4	2	6	2	24	26	16	8	12
BOLA1	616	607	660	360	567	629	602	560	578	511	457	373	534	499	624	454	682	543	520	501	698	847	972	661
SV2A	1923	1940	2803	1332	1670	2091	1994	1636	1514	1695	2025	1341	2028	1720	1960	1449	1607	1677	1654	2010	2359	2401	2582	2195
SF3B4	6337	6065	7398	4584	6066	6508	6826	5361	5569	5442	6212	4692	7465	5560	6384	5011	5931	5951	5991	5308	8301	7689	9611	7367
MTMR11	74	45	105	60	38	136	77	54	67	89	84	56	27	58	73	28	46	54	82	66	100	151	114	116
OTUD7B	2429	1986	2792	1646	2227	2332	2075	1853	1981	2028	2244	1701	2599	2012	2355	1685	1835	1928	1913	2237	2948	2934	3655	2706
	0	0	6	0	0	4	0	0	0	6	0	6	0	0	0	3	0	0	0	0	0	0	0	1
VPS45	2576	2518	2964	1678	2624	2604	2283	2161	1944	2286	2403	1950	2505	1865	2562	1967	2122	2029	1900	2381	3455	3594	4134	3228
PLEKHO1	1696	1484	1936	1051	1303	1602	1629	1280	1230	1211	1327	1140	1664	1125	1352	1052	1364	1332	1188	1157	1855	1754	2348	1825
ANP32E	14510	12430	16257	9383	12624	12568	13182	11072	10168	10778	12208	8982	14464	10881	12911	10101	11110	10000	9917	14088	19956	19168	22271	16818
CA14	14	42	52	29	26	39	45	31	21	33	41	2	49	54	45	22	17	45	43	44	34	40	72	48
APH1A	10148	8545	10589	6285	8460	9340	8609	7464	7724	7912	8590	6871	9822	7842	9112	6511	8290	7543	7247	8630	11488	11514	13279	10450
C1orf54	48	44	48	28	32	60	36	32	44	28	20	24	26	34	34	28	28	26	31	0	63	50	58	57
CIART	0	23	8	12	30	18	13	9	12	22	6	9	2	8	36	8	15	8	16	18	12	0	8	10
MRPS21	3934	3303	4080	2508	3127	3496	3333	2939	2815	2665	3102	2396	3434	2578	3407	2557	3056	2835	2651	3313	4944	4898	5508	4463
PRPF3	4269	4026	5059	3175	3840	3902	4256	3253	3453	3815	3981	2722	4244	3549	4168	3310	3832	3316	3063	4040	6525	6087	7277	5145
RPRD2	5595	4782	6372	3699	4976	5025	5070	4370	3862	4449	4653	3653	5693	4502	4998	4059	4259	4672	4275	5257	7291	6855	8362	6439
TARS2	5441	4999	6232	3768	4793	5252	5347	4363	4261	4532	4468	3550	5624	4554	5183	3814	4547	4503	4349	4331	6980	6622	7691	5672
MIR6878	4	0	2	3	7	1	3	0	2	0	4	2	0	0	0	0	3	7	1	0	2	0	5	2
ECM1	26	35	44	28	52	34	34	46	40	66	28	43	18	21	17	29	32	35	26	23	73	50	67	50
FALEC	4	4	15	6	15	10	21	14	5	8	0	2	8	18	8	2	2	11	19	27	16	6	14	3
ADAMTSL4	65	53	106	45	57	36	72	53	24	67	62	39	45	48	84	60	82	35	92	98	57	74	78	42
	4	2	12	7	0	0	0	0	0	4	0	0	9	6	0	0	0	0	6	0	2	5	20	0
MIR4257	0	0	0	0	0	0	0	0	0	0	0	0	0	0	0	0	0	0	0	0	0	0	0	0
ADAMTSL4-AS1	0	1	17	1	0	2	11	4	2	0	0	4	0	2	0	0	8	1	0	12	5	1	5	0
MCL1	15769	14259	19335	10950	16126	15460	15798	13485	12684	14321	15672	11692	17445	13829	16444	12596	15084	13707	13243	16067	21349	21166	24830	19087
ENSA	13802	11672	15007	8999	12137	12061	12294	9885	10056	10211	11928	9090	13674	9734	12561	9177	11725	10070	10213	11450	16946	16948	19039	15367
GOLPH3L	2666	2264	3425	1891	2491	2551	2823	2415	2238	2522	3041	2277	3306	2520	3192	2626	3015	2697	2463	3618	5218	4708	5446	4326
HORMAD1	8	18	8	14	0	8	0	2	0	12	0	4	0	0	0	0	6	0	0	0	18	4	4	0
CTSS	4	0	8	6	8	0	4	0	2	0	0	0	12	0	0	8	0	0	4	0	6	4	8	2
CTSK	38	41	53	27	49	13	58	38	54	61	12	26	56	15	38	16	26	30	45	80	77	80	67	52
ARNT	4229	3805	4932	3037	3722	3963	4251	3341	2749	3533	3526	2945	3916	3509	3674	3065	3541	3378	3333	3996	5498	5721	6332	4917
SETDB1	3862	3806	4664	2796	3462	3671	3875	3263	3127	3354	4092	2487	3769	3067	3663	2887	3407	3158	2997	3488	5225	4984	6265	4157
CERS2	12430	10719	13654	7502	10909	11433	11505	9489	9370	10050	10745	8388	12056	9344	11158	8349	10450	9719	9671	11500	14257	14407	17283	13434
ANXA9	241	184	318	163	175	215	187	195	186	201	225	146	216	208	201	176	159	153	146	216	323	274	234	230
MINDY1	996	796	959	492	710	861	920	670	645	693	766	576	783	670	741	633	580	677	703	739	936	1084	1134	932
PRUNE1	2792	2497	3619	1915	2725	2550	2715	2065	1979	2302	2393	1871	2875	2341	2719	1917	2558	2179	2192	2676	3677	3664	3945	3290
BNIPL	36	70	84	38	66	18	67	60	58	58	81	67	76	55	78	36	64	55	49	124	90	106	93	56
C1orf56	286	218	367	162	246	251	278	225	200	218	223	216	274	250	285	135	196	199	186	198	283	303	396	262
CDC42SE1	3950	3929	5263	2960	3814	4326	4198	3529	3452	3508	4230	3016	4615	3486	4558	3233	3603	3495	3328	4021	5588	5567	6633	5223
MLLT11	596	475	514	446	402	648	491	405	453	426	618	381	488	452	559	413	580	373	395	424	744	716	890	603
GABPB2	449	413	518	348	414	432	508	373	310	408	439	332	357	318	384	289	387	334	383	280	711	609	740	489
SEMA6C	451	360	446	310	429	498	383	241	399	308	478	288	352	306	426	318	416	364	398	283	503	525	534	369
TNFAIP8L2-SCNM1	0	0	0	0	0	0	0	0	0	0	0	0	0	0	0	0	0	0	0	0	0	0	0	0
TNFAIP8L2	7	0	2	4	0	12	12	8	18	14	0	0	5	2	9	0	0	0	3	0	8	8	4	4
LYSMD1	877	816	942	550	784	797	839	719	635	849	782	689	818	678	789	723	715	765	767	847	1047	1064	1209	1000
SCNM1	38	42	43	22	21	42	34	29	28	15	26	18	47	35	20	31	56	28	22	15	45	33	47	46
TMOD4	16	26	44	40	38	33	20	18	23	26	22	27	46	26	47	14	17	28	26	18	80	53	64	43
VPS72	5033	4789	6095	3429	4580	4824	4688	4109	4031	4207	4767	3478	5204	3961	4965	3799	4657	4155	4532	4854	6483	5960	7564	5613
PIP5K1A	10946	9467	12009	6910	9357	10044	9910	8275	7976	8465	9536	7328	10876	8556	9710	7518	9158	8456	8022	9818	14277	13657	16608	12675
PSMD4	9792	9285	12661	7128	9218	9430	9922	8251	8503	8169	9195	7217	10242	8129	9334	7546	9510	8182	8062	8715	13209	12798	15438	11268
ZNF687	3613	3170	3925	2290	3261	3373	3439	2809	2385	2930	3255	2684	3681	2883	3573	2490	2964	2769	2786	2818	3571	4091	4643	3714
PI4KB	9174	8161	10409	6067	8192	8079	8808	7063	7184	7441	7963	6033	9421	7096	8611	6622	8463	7500	6809	8342	11179	10488	12303	10167
RFX5	5245	4553	6292	3559	4626	4767	4648	3871	4033	4124	4625	3332	5077	3808	4655	3683	4099	3868	3745	4288	7011	6294	7281	5527
SELENBP1	761	726	1030	540	604	681	640	508	537	591	706	500	682	519	675	487	684	540	560	581	991	677	1128	902
PSMB4	14789	13747	16502	9816	13350	14136	14157	11944	12258	11856	13913	9801	15090	11376	14132	10603	14007	11539	11080	12388	17463	16025	20326	15645
POGZ	6168	6074	8182	4581	6260	6559	6241	5257	4698	6148	6195	4461	6180	5354	6363	4612	5350	5508	5181	5922	9135	8695	10495	7703
CGN	1902	1975	2370	1355	1905	1976	1923	1651	1551	1664	1677	1254	2099	1600	2023	1437	1448	1661	1589	1411	2462	2573	2736	2301
TUFT1	958	823	1122	602	723	932	902	667	710	562	909	584	925	752	811	686	777	769	730	811	1294	1326	1467	1100
MIR554	0	0	0	0	0	0	0	0	0	1	0	0	0	0	2	0	0	0	0	0	1	0	0	0
SNX27	5529	4838	6669	3662	5072	5272	4918	4403	3911	4788	5142	3952	5474	4283	5269	4045	4468	4259	3960	5029	7458	7705	8892	6200
CELF3	36	60	22	8	32	28	36	15	28	36	20	12	32	52	36	14	39	7	39	20	22	41	37	41
RIIAD1	0	0	2	0	3	0	2	0	4	0	0	8	4	0	0	0	0	0	0	0	2	0	2	0
MRPL9	4990	4284	5801	3476	4222	4545	4442	3838	3838	3881	4154	3398	4885	4044	4828	3426	4512	3899	4018	4721	5761	5534	6711	5454
OAZ3	39	90	77	39	76	69	47	55	38	39	90	70	75	45	106	64	84	60	67	66	74	88	62	97
TDRKH	1249	1012	1397	778	1141	1089	1123	970	906	989	949	739	1203	957	1197	736	1003	851	861	956	1558	1452	1719	1307
LINGO4	0	0	0	0	0	0	0	0	0	0	0	0	0	0	2	0	0	0	0	0	0	0	0	0
RORC	0	0	0	0	0	0	6	0	0	0	0	0	0	0	0	0	0	0	0	0	0	0	4	0
C2CD4D	0	0	0	0	0	0	0	0	0	0	0	0	0	0	1	0	0	0	0	0	0	0	0	0
C2CD4D-AS1	6	0	0	0	0	0	0	0	0	0	0	6	0	0	0	0	0	0	0	0	0	0	0	0
THEM5	0	0	0	0	0	0	0	0	0	0	0	0	0	0	0	0	0	0	0	0	0	0	0	0
THEM4	1286	1178	1485	996	1221	1193	1234	1073	1024	1071	1003	761	1197	962	1306	856	1253	914	872	1111	1694	1565	1986	1320
S100A10	2933	2366	3090	1863	2428	2204	2580	1993	2047	2033	2167	1840	2900	2025	2472	1699	2420	1866	1935	2311	3499	3322	3943	2948
NBPF18P	0	0	3	0	0	0	2	0	0	0	0	0	0	0	0	0	0	0	0	0	0	0	0	0
S100A11	1166	923	1257	694	1010	1068	976	887	845	932	1078	720	1053	835	1181	858	1087	911	958	963	1471	1379	1756	1388
LOC100131107	0	0	0	0	0	0	0	0	0	0	0	0	0	0	0	0	0	0	0	0	0	0	0	0
TCHHL1	0	0	0	0	1	0	0	0	0	0	0	0	0	0	0	0	0	0	0	0	0	0	0	0
TCHH	20	18	4	2	12	4	14	12	8	8	6	10	2	22	6	8	12	10	10	22	12	34	22	14
RPTN	0	0	0	0	0	0	0	0	0	0	0	0	0	0	0	0	0	0	0	0	0	0	0	0
HRNR	0	0	0	0	0	0	0	0	0	0	0	0	0	0	0	0	0	0	0	0	0	0	0	0
FLG	0	0	0	0	0	0	2	2	0	0	0	0	0	0	0	0	0	0	4	0	0	0	0	8
FLG-AS1	0	0	0	0	0	0	0	4	0	0	0	0	0	0	0	0	0	0	0	0	0	0	0	0
FLG2	0	0	0	0	0	0	0	0	0	0	0	0	0	0	0	0	0	0	0	0	0	0	0	0
CRNN	0	0	0	0	0	0	0	0	0	0	0	0	0	0	0	0	0	0	0	0	0	0	0	0
LCE5A	0	0	0	0	0	0	0	0	0	0	0	0	0	0	0	0	0	0	0	0	0	0	0	0
CRCT1	0	0	0	0	0	0	0	0	0	0	0	0	0	0	0	0	0	0	0	0	0	0	0	0
LCE3E	0	0	0	0	0	0	0	0	0	0	0	0	0	0	0	0	0	0	0	0	0	0	0	0
LCE3D	0	0	0	0	0	0	0	0	0	0	0	0	0	0	0	0	0	0	0	0	0	0	0	0
LCE3C	0	0	0	0	0	0	0	0	0	0	0	0	0	0	0	0	0	0	0	0	0	0	0	0
LCE3B	0	0	0	0	0	0	0	0	0	0	0	0	0	0	0	0	0	0	0	0	0	0	0	0
LCE3A	0	0	0	0	0	0	0	0	0	0	0	0	0	0	0	0	0	0	0	0	0	0	0	4
LCE2D	0	0	0	0	0	0	0	0	0	0	0	0	0	0	0	0	0	0	0	0	0	0	0	0
LCE2C	0	0	0	0	0	0	0	0	0	0	0	0	0	0	0	0	0	0	0	0	0	0	0	0
LCE2B	0	0	0	0	0	0	0	0	0	0	0	0	0	0	0	0	0	0	0	0	0	0	0	0
LCE2A	0	0	0	0	0	0	0	0	0	0	0	0	0	0	0	0	0	0	0	0	0	0	0	0
LCE4A	0	0	0	0	0	0	0	0	0	0	0	0	0	0	0	0	0	0	0	0	0	0	0	0
KPLCE	0	0	0	0	0	0	0	0	0	0	0	0	0	0	0	0	0	0	0	0	0	0	0	0
KPRP	0	0	0	0	0	0	0	0	0	1	0	0	0	0	0	0	0	0	0	0	0	0	0	0
LCE1F	0	0	0	0	0	0	0	0	0	0	0	0	0	0	0	0	0	0	0	0	0	0	0	0
LCE1E	0	0	0	0	0	0	0	0	0	0	0	0	0	0	0	0	0	0	0	0	0	0	0	0
LCE1D	0	0	0	0	0	0	0	0	0	0	0	0	0	0	0	0	0	0	0	0	0	0	0	0
LCE1C	0	0	0	0	0	0	0	0	0	0	0	0	0	0	0	0	0	0	0	0	0	0	0	0
LCE1B	0	0	0	0	0	0	0	0	0	0	0	0	0	0	0	0	0	0	0	0	0	0	0	0
LCE1A	0	0	0	0	0	0	0	0	0	0	0	0	0	0	0	0	0	0	0	0	0	0	0	0
LCE6A	0	0	0	0	0	0	0	0	0	0	0	0	0	0	0	0	0	0	0	0	0	0	0	0
SMCP	0	0	0	0	0	0	0	0	0	0	0	0	0	0	0	0	0	0	0	0	0	0	0	0
IVL	0	0	0	0	0	0	0	0	0	0	0	0	0	0	0	0	0	0	0	0	0	0	0	0
SPRR4	0	0	0	0	0	0	0	0	0	0	0	0	0	0	0	0	0	0	0	0	0	0	0	0
SPRR1A	0	2	0	0	0	0	0	0	0	0	0	0	0	0	0	0	0	0	0	0	0	0	0	0
SPRR3	0	0	0	0	0	0	0	0	0	0	0	0	0	0	0	0	0	0	0	0	0	0	0	0
SPRR1B	0	0	0	0	0	0	0	0	0	0	0	0	0	0	0	0	0	0	0	0	0	0	0	0
SPRR2D	0	0	0	0	0	0	0	0	0	0	0	0	0	0	0	0	0	0	0	0	0	0	0	0
SPRR2A	0	0	0	0	0	0	0	0	0	0	0	0	0	0	0	0	1	0	0	0	0	0	0	0
SPRR2B	0	0	0	0	0	0	0	0	0	0	0	0	0	0	0	0	0	0	0	0	0	0	0	0
SPRR2E	0	0	0	0	0	0	0	0	0	0	0	0	0	0	4	0	0	0	0	0	0	0	0	0
SPRR2F	12	4	0	8	4	6	10	4	2	2	0	0	10	4	14	4	7	6	6	12	0	2	4	4
SPRR2C	0	0	0	0	0	0	0	0	0	0	0	0	0	0	0	0	0	0	0	0	0	0	0	0
SPRR2G	0	0	0	0	0	0	0	0	0	0	0	0	0	0	0	0	0	0	0	0	0	0	0	0
LOC101928009	0	0	0	0	0	0	0	0	0	0	0	0	0	0	0	0	0	0	0	0	0	0	0	0
LELP1	0	0	0	0	0	0	0	0	0	0	0	0	0	0	0	0	0	0	0	0	0	0	0	0
PRR9	0	0	0	0	0	0	0	0	0	0	0	0	0	0	0	0	0	0	0	0	0	0	0	0
LORICRIN	0	0	10	0	0	0	0	0	0	1	0	0	0	0	0	2	0	0	0	0	0	0	4	0
PGLYRP3	0	0	0	0	0	0	0	0	0	0	0	0	0	0	0	0	0	0	0	0	0	0	0	0
PGLYRP4	0	0	0	0	0	0	0	0	0	0	0	0	0	0	0	0	0	0	0	0	0	0	0	0
S100A9	0	0	0	0	0	0	0	0	0	0	0	0	0	0	0	0	0	0	0	0	0	0	0	0
S100A12	0	0	0	0	0	0	0	0	0	0	0	0	0	0	0	0	0	0	0	0	0	0	0	0
S100A8	0	0	0	0	0	0	0	0	0	0	0	0	0	0	0	0	0	0	0	0	0	0	0	0
S100A7A	0	0	0	0	0	0	0	0	0	0	0	0	0	0	0	0	0	0	0	0	0	0	0	0
S100A7L2	0	0	0	0	0	0	0	0	0	0	0	0	0	0	0	0	0	0	0	0	0	0	0	0
S100A7	0	0	0	0	0	0	0	0	0	0	0	0	0	0	0	0	0	0	0	0	0	0	0	0
S100A6	0	0	0	0	0	0	0	0	0	0	0	0	0	0	2	0	0	0	0	0	0	0	0	0
S100A5	0	0	0	0	6	0	0	1	0	0	0	0	0	0	0	0	0	0	0	0	0	0	0	0
S100A4	30	48	53	17	8	15	23	6	34	18	23	46	35	8	24	19	44	19	26	4	42	19	62	56
LOC101928034	0	0	0	0	0	0	0	0	0	0	0	0	0	0	0	0	0	2	0	0	0	0	0	0
S100A3	0	0	0	0	0	0	0	0	0	0	0	0	0	0	0	0	0	0	0	0	0	0	0	0
S100A2	2	2	16	6	11	9	4	0	2	0	2	2	1	4	2	6	3	0	2	0	8	7	2	6
S100A16	0	4	0	2	0	4	6	0	0	0	8	0	6	4	0	6	0	0	0	0	4	6	6	6
S100A14	2	6	8	0	12	0	0	0	0	0	0	0	0	4	0	0	0	0	4	28	2	0	0	0
S100A13	1136	932	1363	855	1152	1080	1065	944	901	954	1189	796	1048	732	1228	854	900	915	912	847	1548	1417	1862	1410
S100A1	47	32	51	38	36	25	28	35	30	31	7	22	71	9	28	23	51	32	13	14	22	47	62	25
CHTOP	9626	7919	10677	6167	8233	9380	8537	7214	7153	7235	7909	6006	8550	7411	8540	6050	8182	7056	7507	7819	11696	11409	13932	10567
SNAPIN	2587	2113	2854	1669	2280	2280	2169	1978	1811	1818	2075	1627	2464	1933	2276	1815	2158	1626	1946	2079	3027	2740	3421	2527
ILF2	28445	26169	33862	19067	26211	25962	27824	22292	22620	23893	25863	18933	28856	21633	27366	20565	26742	22239	21867	28502	39348	37390	43599	33881
TRX-CAT1-1	0	0	0	0	0	0	0	0	2	0	0	0	0	0	0	0	0	0	0	0	0	0	0	0
NPR1	2	6	3	8	12	10	6	8	2	20	0	0	20	0	0	6	2	2	1	0	6	2	4	2
MIR8083	0	0	0	0	0	0	0	0	0	0	0	0	0	0	0	0	0	0	0	0	0	0	0	0
INTS3	0	1	6	1	5	1	0	2	9	0	7	0	0	2	0	0	0	2	5	7	0	0	0	0
SLC27A3	0	0	0	0	0	0	0	0	0	0	0	0	0	0	0	1	0	0	0	0	0	0	0	2
LOC343052	0	0	0	0	0	0	0	0	0	0	0	0	0	0	0	0	0	0	0	0	0	0	0	0
	0	0	0	0	0	0	0	0	0	0	0	0	0	0	0	0	0	0	0	0	0	0	3	0
GATAD2B	79	78	170	52	74	49	104	126	68	47	42	82	98	93	96	78	63	84	95	78	79	125	204	119
DENND4B	4751	4853	6244	3481	4891	5114	4880	4399	4139	4559	5096	3342	4485	4391	4889	3657	4973	4228	4326	3862	6242	5844	7100	5095
CRTC2	2699	2506	3255	1771	2552	2943	2695	2136	2429	2406	2642	1933	2801	2267	2822	1939	2638	2554	2474	2341	3391	2951	3810	3282
SLC39A1	7159	6354	8114	4295	5976	6293	6369	5266	5394	5384	6133	4501	6950	5310	6753	4522	6397	5663	5561	6244	8071	7997	9602	7662
MIR6737	0	0	0	0	0	0	0	0	0	0	0	0	0	0	0	0	3	0	0	0	0	0	0	0
CREB3L4	213	334	394	201	260	243	313	249	229	316	309	182	298	245	381	217	344	286	200	375	482	382	463	348
JTB	9673	8706	10967	6075	8059	8824	8797	7419	7374	7240	8946	6464	9532	7391	9236	6970	9145	7644	7566	8306	11363	11016	13714	11368
RAB13	1219	1053	1539	849	1096	1059	1096	977	1060	945	1089	772	1202	822	1116	844	1029	988	875	1331	1633	1507	2058	1538
RPS27	2835	2254	3057	1784	1989	2250	2521	1973	2066	1899	2076	1558	2117	1452	2365	1685	2131	1716	2069	2560	3701	3743	4827	3388
NUP210L	4	18	7	15	15	9	5	2	11	16	13	3	9	22	11	6	0	8	2	0	15	7	30	23
MIR5698	0	0	0	0	0	0	0	0	0	0	0	0	0	0	0	0	0	0	0	0	0	0	0	0
TPM3	21334	18749	25047	13835	19202	19178	19748	16781	16220	16537	17848	13727	20595	15889	19610	14698	18814	15761	14896	18961	26466	25931	30113	23027
MIR190B	0	0	0	0	0	0	0	0	0	0	0	0	0	0	0	0	0	0	0	0	0	0	0	0
CFAP141	1	0	1	0	0	1	0	4	0	8	6	0	0	0	6	0	0	0	6	0	2	10	6	3
C1orf43	13694	12366	16341	9224	12156	13078	13039	10549	10538	10385	12416	9521	14053	10482	12660	10068	12401	11175	10506	12966	17878	16626	20507	15671
UBAP2L	21679	19082	25940	14739	19798	20703	21471	17829	16711	18958	19952	14424	21316	17721	21484	15372	17274	17484	17145	20763	27917	27176	32263	23985
HAX1	6737	5844	7456	4068	5722	6182	6387	5064	5020	5460	5728	4397	6178	5156	6380	4661	6157	5384	5209	6169	8315	8168	10009	7350
AQP10	0	0	0	0	1	0	0	0	0	0	0	0	0	0	0	0	0	0	0	0	0	0	4	0
ATP8B2	8321	7475	9387	5204	7501	7738	7644	6881	5834	6788	7091	4973	8146	6526	7642	5782	6452	6276	6179	7027	9634	9187	11444	8564
IL6R	275	277	311	188	171	212	264	195	233	241	277	177	300	263	206	168	165	205	206	175	227	234	302	283
SHE	8	17	24	0	20	0	4	14	42	10	4	0	0	0	4	2	0	8	12	1	0	12	20	10
TDRD10	0	0	0	0	1	0	0	0	0	0	0	0	1	0	0	0	0	0	1	0	0	0	0	0
UBE2Q1	5782	5238	7023	3884	5526	5600	5719	4533	4792	4903	5334	4192	5660	4667	5475	3995	5012	4466	4482	5063	7227	7062	8335	6744
UBE2Q1-AS1	8	6	20	9	6	5	10	2	15	8	3	10	18	8	2	3	7	9	8	4	6	12	21	8
CHRNB2	16	3	22	2	4	8	28	14	18	26	6	8	24	1	10	10	12	10	18	0	24	12	7	0
ADAR	27000	22997	30975	17486	24502	24577	25556	19995	19430	21723	23668	17587	26619	20928	25194	18931	21061	20933	19411	23400	34744	33903	39550	29733
KCNN3	66	48	96	52	79	62	72	87	26	67	79	43	101	46	99	62	53	63	70	74	70	124	100	86
PMVK	1453	1256	1493	900	1263	1252	1390	1157	1102	1038	1280	938	1215	964	1367	951	1334	1197	1164	1062	1555	1550	1974	1483
PBXIP1	607	555	741	476	566	638	694	614	611	522	782	513	793	530	658	472	664	585	529	653	752	946	1017	720
PYGO2	4140	3496	4205	2730	3791	3871	3754	3203	3330	3403	4043	2889	4528	3303	3743	2761	3783	3281	3172	3421	4964	4815	5797	4485
LOC101928120	43	14	60	20	81	30	55	30	28	56	50	53	60	27	83	49	47	21	42	14	53	46	43	52
SHC1	3026	2694	3180	2083	2786	2876	3004	2508	2490	2615	3018	1926	3254	2598	3040	2439	2891	2710	2656	2722	3652	3793	4418	3595
CKS1B	2632	2135	3128	1606	2394	2203	2623	1910	1973	2011	2234	1709	2303	2000	2493	1871	2599	1984	2091	2360	3182	2919	3392	2899
MIR4258	0	11	5	9	0	7	2	8	16	6	9	2	25	5	15	5	6	2	5	8	7	11	18	13
FLAD1	3363	3244	4269	2257	2894	3236	3630	2609	2889	2699	3136	2387	3462	2907	3340	2478	2902	2766	2634	2924	4023	3932	4905	3715
LENEP	2	0	0	0	0	2	0	4	2	4	6	0	6	0	0	0	0	0	2	0	0	0	0	4
ZBTB7B	618	688	889	455	593	734	670	686	553	583	643	500	819	600	705	537	715	583	662	742	878	827	1015	833
DCST2	4	10	13	8	0	9	7	7	4	6	10	0	8	16	8	6	1	12	4	7	3	18	20	4
DCST1	6	6	28	3	23	7	10	11	12	3	2	7	18	13	3	10	9	8	5	6	11	9	8	6
DCST1-AS1	81	53	78	47	98	61	68	50	18	56	46	35	52	43	49	26	85	59	38	125	82	59	68	74
ADAM15	3361	2935	3562	1974	2807	2894	3084	2468	2546	2582	2989	2039	3064	2783	3031	2073	2904	2471	2454	2462	3423	3274	3843	2978
EFNA4	242	275	336	154	237	241	231	179	228	190	309	169	311	233	311	194	298	265	214	223	386	377	375	284
EFNA3	470	465	581	315	456	370	389	348	345	407	455	382	401	418	492	316	425	425	441	534	594	591	677	510
EFNA1	357	340	417	248	226	342	401	260	239	236	253	248	319	278	347	243	259	244	313	243	452	510	493	400
SLC50A1	1817	1598	2235	1181	1481	1624	1666	1321	1428	1474	1801	1158	1618	1401	1890	1396	1860	1525	1465	1614	2537	2438	3141	2155
DPM3	781	752	918	627	647	779	736	661	584	522	767	509	742	632	819	525	752	632	749	605	925	863	1106	797
KRTCAP2	2738	2556	3099	1994	2483	2762	2820	2222	2070	2525	2811	1869	2676	2395	2764	2037	2721	2494	2310	2352	3156	2772	3472	2736
TRIM46	59	49	88	63	56	82	40	66	48	62	69	16	50	70	42	46	39	56	60	54	74	84	64	78
MUC1	18	7	16	23	12	32	19	24	31	36	31	6	32	29	62	14	43	37	14	44	24	22	38	23
MIR92B	0	0	0	0	0	0	0	0	0	0	0	1	4	0	0	0	0	0	0	0	0	5	0	0
THBS3	263	304	311	166	217	299	291	277	195	294	253	162	316	264	203	189	226	206	128	191	464	374	460	276
MTX1	1262	1454	1388	983	1311	1201	1520	1043	1194	1111	1247	986	1379	1095	1286	1041	1358	1134	1083	1333	1594	1566	2025	1430
GBA1LP	66	36	21	58	54	51	57	61	40	28	88	26	28	58	27	46	85	35	41	24	73	88	63	52
GBA1	182	187	184	52	156	121	122	60	76	94	140	66	176	87	112	96	143	106	107	150	109	140	178	111
ENTREP3	1	0	1	0	1	3	8	2	3	4	0	1	0	0	2	2	3	0	0	0	1	0	0	1
SCAMP3	0	6	0	1	0	2	0	4	5	1	1	5	4	0	0	1	3	1	1	1	0	0	1	2
CLK2	0	2	1	0	0	2	4	1	0	0	0	0	6	0	0	0	1	0	0	9	1	3	4	2
HCN3	1	0	0	0	0	0	0	0	0	0	0	0	2	0	0	0	0	0	0	0	0	0	0	0
PKLR	0	0	0	0	0	0	0	0	0	0	0	0	0	0	0	0	0	0	0	0	0	0	0	0
FDPS	7417	6444	8595	4644	6642	6466	6728	5993	5768	5789	6347	4690	6942	5309	6728	4917	6452	5342	5228	6192	8750	8443	10129	7252
RUSC1-AS1	2	15	5	11	4	13	16	3	8	18	4	6	5	4	13	11	6	6	16	20	12	2	8	5
RUSC1	3312	3163	3849	2143	2830	3311	3236	2493	2831	2708	3001	2198	3169	2635	3270	2186	2774	2911	2717	2923	3985	3862	4612	3554
ASH1L	6254	5172	7270	3950	5761	5753	5733	5048	3948	5272	5208	4123	5605	4500	5626	4232	4025	4651	4498	6235	7884	7750	9191	6692
MIR555	1	0	0	0	0	0	2	0	0	0	0	0	0	0	0	0	0	0	0	0	0	0	0	0
POU5F1P4	6	0	2	0	0	6	0	0	1	0	0	0	0	0	2	0	0	0	4	0	0	0	1	0
ASH1L-AS1	99	129	156	42	124	74	137	124	101	80	85	154	131	78	84	98	81	90	80	90	164	106	182	132
MSTO1	2142	1968	2506	1488	2206	2156	2387	2046	2012	2063	2307	1505	2376	2210	2561	1845	2366	1943	1921	2031	3149	2999	3605	2497
YY1AP1	3953	3583	4467	2526	3747	3956	3598	2984	3099	3251	3695	2663	4132	3143	3654	2553	3313	3294	3071	3851	5442	5274	6197	4491
DAP3	5728	5030	6203	3651	4749	4738	5257	4433	4325	4318	4848	3450	5660	4317	5070	3753	4778	4062	3846	4420	7059	7051	7963	6291
MSTO2P	430	453	564	292	508	517	435	458	454	564	628	382	513	451	584	357	465	476	385	548	928	769	796	512
GON4L	3002	2430	3167	1952	2947	2685	2914	2464	2198	2566	2679	1780	3423	2221	2840	2016	2229	2430	2157	2767	3817	3823	4386	3242
SYT11	96	30	38	48	26	38	42	43	28	52	64	32	42	26	52	48	34	35	26	85	56	43	102	90
RIT1	1146	955	1394	671	1139	1002	881	862	865	878	967	765	1065	811	989	885	956	868	877	1145	1378	1365	1588	1330
KHDC4	3740	3537	4889	2754	4034	4277	3881	3430	3362	3862	4048	3080	3767	3426	3839	2906	3481	3127	3063	3704	6207	6065	6971	4543
SNORA80E	6	4	6	2	0	0	10	2	1	6	4	4	0	6	4	5	4	2	2	0	2	7	6	7
SCARNA4	0	4	5	0	0	1	6	2	0	0	0	0	0	0	0	1	1	1	0	0	3	3	2	4
RXFP4	1	0	0	0	0	0	0	0	0	0	0	0	0	0	0	0	4	0	0	0	0	0	0	0
ARHGEF2	3736	3376	4077	2243	3497	3860	3712	3037	3055	3117	3600	2557	3929	2855	3606	2621	3116	2971	3077	3335	4247	4692	5200	4054
MIR6738	0	0	0	0	1	0	0	0	0	0	0	0	0	0	0	0	0	0	0	0	0	0	0	0
LOC105371729	5	6	11	4	26	13	11	9	13	15	1	11	10	6	35	15	6	12	8	18	9	13	10	14
SSR2	10840	9029	12552	7103	9682	10842	11484	9463	10202	10313	10758	9036	13794	10729	13743	11017	14023	12032	11617	13995	19878	19030	22500	18516
UBQLN4	6130	5478	6985	4003	5873	5692	5917	4848	4884	5160	5247	4169	6402	5080	5856	4323	5290	4770	4765	5611	7814	7477	8964	6969
LAMTOR2	1602	1358	1757	1009	1182	1262	1338	1218	1108	1046	1210	924	1465	1163	1371	1113	1316	1146	1123	1303	1915	1735	2139	1889
RAB25	0	14	6	8	4	2	6	0	0	2	6	3	2	2	2	0	12	8	0	0	10	6	8	0
MEX3A	2487	1826	2667	1457	1685	2408	2294	1941	1563	1698	1928	1389	2277	1644	2133	1449	1737	1844	1840	1735	2431	2713	2931	2240
LMNA	2883	2432	3258	1869	2301	2839	2803	2321	2211	2313	2704	1934	3081	2288	2963	2001	2840	2372	2545	2452	3442	3189	3811	3049
SEMA4A	58	49	127	42	35	57	60	56	58	87	45	38	52	36	44	64	68	44	49	8	64	81	78	63
SLC25A44	2970	2618	3527	2170	3039	2984	2960	2411	2614	2557	2698	2382	3048	2728	3023	2492	2539	2688	2554	2858	4175	4026	4487	3577
PMF1	1384	1269	1735	823	1166	1365	1208	1162	1148	995	1172	971	1475	1083	1331	990	1260	1006	1062	903	1466	1378	1699	1304
PMF1-BGLAP	0	0	0	0	0	0	0	0	0	0	0	0	0	0	0	0	0	0	0	0	0	0	0	0
BGLAP	10	0	2	1	6	10	4	1	0	0	0	0	0	0	1	0	1	1	15	0	5	2	0	2
PAQR6	114	140	203	101	117	159	86	124	145	152	245	70	188	118	79	127	93	70	89	128	208	182	185	112
SMG5	14157	13296	16796	9880	13558	14283	13582	11987	11595	12341	13536	10167	14886	11550	14472	9988	12577	12080	11879	13628	19108	18032	20292	16154
TMEM79	341	292	407	205	314	372	364	348	305	335	501	256	413	273	297	285	367	336	265	215	399	432	411	358
GLMP	2528	2292	3251	1637	2107	2620	2427	2081	2031	2345	2344	1693	2697	2132	2577	1885	2292	2060	1990	2001	3081	2899	3146	2797
VHLL	0	0	0	0	0	0	0	0	0	0	1	0	0	0	0	0	0	0	0	0	0	0	0	1
CCT3	54116	46485	61000	34557	48326	48689	49847	40998	39522	41484	47861	34318	52102	40891	48615	37184	47033	40657	38984	49002	66556	65675	76710	59569
TSACC	136	166	213	110	149	93	115	152	76	122	141	75	75	77	129	97	129	78	86	149	156	163	215	159
RHBG	10	0	0	1	6	2	0	0	1	2	10	1	1	0	0	3	0	0	0	0	6	2	17	0
MIR9-1HG	25	16	24	9	2	27	24	23	20	2	36	8	32	18	14	16	23	11	16	19	9	15	25	26
MIR9-1	0	0	0	0	0	0	0	0	0	0	0	0	0	0	0	0	0	0	0	0	0	0	0	0
MEF2D	1445	1389	1946	1197	1636	1906	1836	1425	1373	1463	1625	1242	1978	1396	1794	1244	1603	1609	1595	1726	2157	2067	2587	1832
IQGAP3	2744	2986	3452	2208	2643	3322	2775	2611	2507	2746	3013	1979	2868	2462	2951	2128	2462	2451	2476	2658	3725	4049	4883	3149
TTC24	0	0	1	3	8	0	0	4	6	3	0	10	0	3	22	0	3	2	6	0	0	0	25	0
NAXE	7053	5985	7395	4610	5896	6389	6641	5858	5187	5333	5773	4503	6741	5110	5991	4430	5848	5139	5198	4586	7022	6593	8297	6865
GPATCH4	8496	7779	10378	5998	7952	7819	7735	7061	6378	6766	7331	5954	7975	6706	8287	5611	7161	6651	6618	7968	12259	11480	14176	10197
LOC101928177	1	0	0	2	0	2	0	2	0	0	0	0	0	0	0	1	0	0	0	22	6	0	0	6
HAPLN2	6	12	8	4	9	14	6	10	21	16	17	2	0	1	4	2	20	11	15	0	23	8	10	18
BCAN	4	8	6	1	1	2	14	8	6	4	22	0	4	0	10	12	0	16	4	0	2	4	10	4
NES	179	183	270	180	193	334	245	217	173	176	230	111	320	198	242	156	259	198	229	200	263	319	395	230
CRABP2	618	424	689	349	458	529	467	339	433	360	532	345	480	459	541	360	496	452	482	368	635	528	757	521
ISG20L2	6594	6106	8174	4647	6172	6498	7017	5601	5486	5794	6574	4594	7313	5594	6769	5179	6296	5866	5661	6589	9031	8481	10437	7994
METTL25B	1255	1037	1178	652	1157	1102	1064	888	855	962	1006	807	1305	902	1214	836	1099	924	957	948	1349	1317	1717	1208
MRPL24	3275	2808	3823	2232	2606	2814	2805	2798	2383	2394	2684	2161	2872	2202	2911	2363	2709	2439	2297	2880	4070	4036	4904	3762
HDGF	27408	23788	32199	18227	24834	25753	26274	21835	21107	21543	24141	18412	26649	20676	25561	18933	24302	22541	21036	23898	32744	32273	38569	30088
PRCC	9811	8558	11160	6347	8968	9327	9173	7513	7760	7849	9142	6754	9608	8051	9371	6671	8850	8186	8184	8696	10940	10419	13063	10296
SH2D2A	247	208	299	147	305	191	258	216	229	237	215	192	268	191	244	161	169	215	165	146	342	384	351	216
NTRK1	32	24	36	24	12	11	17	24	13	11	16	5	29	27	16	22	14	15	16	5	28	34	10	10
INSRR	0	13	3	0	8	1	2	0	0	0	1	0	0	0	2	4	0	0	2	18	2	0	0	0
PEAR1	0	0	0	0	0	2	2	2	0	10	1	18	8	6	0	0	0	0	0	1	6	2	14	0
LRRC71	6	3	10	7	10	3	6	0	10	1	18	8	8	8	0	16	0	3	8	0	6	4	3	18
ARHGEF11	3746	3238	4201	2495	3534	3580	3263	2859	2674	2855	3400	2342	3290	2972	3577	2648	2853	2920	2841	3168	4434	4401	5449	4002
MIR765	2	6	1	0	0	0	0	0	0	0	0	0	0	0	0	0	0	0	1	7	7	2	0	0
ETV3L	2	0	4	0	0	2	2	0	2	0	3	0	1	5	4	0	0	0	1	0	0	0	0	1
ETV3	2614	2238	2977	1603	2165	2303	2481	2017	1952	2145	2667	1678	2483	1860	2371	1966	2024	1987	1991	2411	3231	3021	4120	3193
CYCSP52	0	0	0	4	0	4	2	4	0	0	4	0	4	2	0	1	0	0	1	0	0	4	0	0
FCRL5	0	0	0	0	0	0	0	0	0	0	0	0	0	0	0	0	0	0	0	0	0	0	0	0
FCRL4	0	0	0	0	0	0	0	0	0	0	0	0	0	0	0	0	0	0	0	0	0	0	0	0
FCRL3	0	0	0	0	0	0	0	0	0	0	0	0	0	0	0	0	0	0	0	0	0	0	0	2
FCRL2	0	0	0	0	0	0	0	0	0	0	0	0	0	0	0	0	0	0	0	0	0	0	0	0
FCRL1	0	0	0	0	0	0	0	0	0	0	0	0	0	0	0	0	0	0	0	0	0	0	0	0
CD5L	0	0	0	0	0	0	0	0	0	0	0	4	0	0	0	0	0	0	0	0	0	0	0	0
KIRREL1	3180	2758	3194	2035	2861	2771	2856	2639	2015	2493	2669	2149	3035	2381	2916	1987	2191	2287	2178	2672	3550	3464	4281	3205
LINC01704	0	0	0	0	0	0	0	0	0	0	0	0	0	0	0	0	0	0	0	0	0	0	0	0
CD1D	12	28	21	18	4	13	16	53	12	23	6	10	26	20	12	24	10	24	22	16	14	27	44	26
CD1A	0	0	0	0	0	0	0	0	0	0	0	0	0	0	0	0	0	0	0	0	0	0	0	0
CD1C	0	0	0	0	0	0	0	0	0	0	0	0	0	0	0	0	0	0	0	0	0	0	0	0
CD1B	0	0	0	0	0	0	0	0	0	0	0	0	0	0	0	0	0	0	0	0	0	0	0	0
CD1E	0	0	0	0	0	0	0	0	0	0	0	1	0	0	0	0	0	0	0	0	0	0	0	0
OR10T2	0	0	0	0	0	0	0	0	0	0	0	0	0	0	0	0	0	0	0	0	0	0	0	0
OR10K2	0	0	0	0	0	0	0	0	0	0	0	0	0	0	0	0	0	0	0	0	0	0	0	0
OR10K1	0	0	0	0	0	0	0	0	0	0	0	0	0	0	0	0	0	0	0	0	0	0	1	0
OR10R2	0	0	0	0	0	0	0	0	0	0	0	0	0	0	0	0	0	0	0	0	0	0	0	0
OR6Y1	0	0	0	0	0	0	0	0	0	0	0	0	0	0	0	0	0	0	0	0	0	0	0	0
OR6P1	0	0	0	0	0	0	0	0	0	0	0	0	0	0	0	0	0	0	0	0	0	0	0	0
OR10X1	0	0	0	0	0	0	0	0	0	0	0	0	0	0	0	0	0	0	0	0	0	0	0	0
OR10Z1	0	0	0	0	0	0	0	0	0	0	0	0	0	0	0	0	0	0	0	0	0	0	0	0
SPTA1	0	0	0	0	0	0	0	0	0	0	0	0	0	0	0	0	0	0	0	0	0	0	0	0
OR6K2	0	0	0	0	0	0	0	0	0	0	0	0	0	0	0	0	0	0	0	0	0	0	0	0
OR6K3	0	0	0	0	0	0	0	0	0	0	0	0	0	0	0	0	0	0	0	0	0	0	0	0
OR6K6	0	0	0	0	0	0	0	0	0	0	0	0	0	0	0	0	0	0	0	0	0	0	0	0
OR6N1	0	0	0	0	0	0	0	0	0	0	0	0	0	0	0	0	0	0	0	0	0	0	0	0
OR6N2	0	0	0	0	0	0	0	0	0	0	0	0	0	0	0	0	0	0	0	0	0	0	0	0
MNDA	0	0	0	0	0	0	0	0	0	0	0	0	0	0	0	0	0	0	0	0	0	0	0	0
PYHIN1	0	0	0	0	0	0	0	0	0	0	0	4	0	0	0	0	0	0	4	0	0	0	0	0
IFI16	2	6	4	0	3	0	14	0	6	0	0	2	4	0	10	2	6	0	2	40	10	8	6	24
AIM2	0	0	0	0	0	0	0	0	0	0	0	0	0	0	0	0	0	0	0	0	0	0	0	0
TRR-TCT4-1	0	0	0	0	0	0	0	0	0	0	0	0	0	0	0	0	0	0	0	0	0	0	0	0
CADM3	0	0	0	0	0	0	0	0	0	0	0	0	0	0	0	0	0	0	0	0	0	0	0	0
CADM3-AS1	0	0	0	0	0	0	0	0	0	0	0	0	0	0	0	0	0	0	0	0	0	0	0	0
ACKR1	0	0	0	0	0	0	0	0	0	0	0	0	0	0	0	0	0	0	0	0	0	0	0	0
FCER1A	0	0	0	0	0	0	0	0	0	0	0	0	0	0	0	0	0	0	0	0	0	0	0	0
OR10J3	0	0	0	0	0	0	0	0	0	0	0	0	0	0	0	0	0	0	0	0	0	0	0	0
OR10J1	0	0	0	0	0	0	0	0	0	0	0	0	0	0	0	0	0	0	0	0	0	0	0	0
OR10J5	0	0	0	0	0	0	0	0	0	0	0	0	0	0	0	0	0	0	0	0	0	0	0	0
APCS	0	0	0	0	0	0	0	0	0	0	0	0	0	0	0	0	0	0	0	0	0	0	0	0
CRP	0	0	0	0	0	0	0	0	0	0	0	0	0	0	0	1	0	0	0	0	0	0	0	0
DUSP23	39	8	35	24	3	34	32	28	2	8	24	16	24	25	36	17	28	23	22	20	28	46	34	25
FCRL6	0	0	0	0	0	0	0	0	0	0	0	0	0	0	0	0	0	0	0	0	0	0	0	0
SLAMF8	2	0	0	0	0	0	0	4	0	0	0	0	0	0	0	0	0	0	0	0	0	6	6	0
SNHG28	3	1	0	0	0	0	0	0	2	6	0	0	0	0	0	0	5	1	0	0	2	2	4	0
VSIG8	0	3	0	0	0	1	1	0	2	10	0	4	0	0	0	0	8	0	2	0	0	0	0	2
CFAP45	20	6	7	16	26	25	27	31	12	10	14	26	12	10	28	41	31	6	6	36	45	26	34	30
MIR4259	0	0	0	0	0	0	0	0	0	0	0	0	0	0	0	0	0	0	0	0	0	0	0	0
TAGLN2	16725	15047	19565	11623	15134	16345	16888	13296	13229	13735	16000	11481	17590	13498	16605	11951	15897	13908	14028	14505	20767	20854	24208	18723
IGSF9	110	120	178	106	187	145	143	75	117	101	168	74	107	86	106	105	165	170	117	110	130	131	206	125
SLAMF9	0	0	0	0	0	0	0	0	0	0	0	0	0	0	0	0	0	0	0	0	0	0	0	0
LINC01133	0	0	4	0	0	0	0	0	0	0	0	0	0	0	0	0	0	0	0	0	0	0	0	0
PIGM	2395	2161	3068	1424	2026	2167	2289	2084	1777	2241	2174	1594	2298	1992	2500	1894	2083	1967	1894	2383	3198	3001	3649	2599
KCNJ10	0	16	24	4	1	3	8	12	10	12	16	0	12	3	4	12	4	0	4	0	16	22	4	10
KCNJ9	10	0	2	4	2	2	2	0	0	10	4	0	0	6	4	2	6	10	0	0	2	3	14	6
IGSF8	1703	1590	2084	991	1396	1600	1588	1547	1220	1250	1380	1101	1615	1407	1542	1040	1432	1363	1477	1224	1717	1718	1870	1549
ATP1A2	0	0	0	2	0	0	0	0	0	1	1	0	0	0	0	0	0	0	0	0	0	0	0	0
ATP1A4	0	0	1	0	0	0	0	1	0	0	0	2	0	0	0	0	0	0	0	0	0	0	0	0
CASQ1	5	3	0	0	16	7	4	0	2	8	3	6	5	8	4	2	13	0	0	8	11	19	12	0
LOC729867	2	28	17	22	18	30	11	22	40	15	34	7	14	5	16	16	28	14	6	38	40	28	14	22
PEA15	5049	4670	6005	3568	4376	4827	4908	3838	3857	3831	4433	3479	4820	3864	4952	3721	4255	3963	3663	4871	6323	6736	7783	5924
DCAF8	4993	4773	5878	3527	4630	4911	4763	3944	3941	4216	4923	3303	4912	3995	4880	3573	4372	3968	3911	4811	6656	6412	7666	5484
PEX19	6868	6048	7930	4440	6094	6044	6205	5431	4825	5210	6161	4521	6793	5330	6485	4907	5648	5290	4843	6305	8457	8363	9816	7345
NHLH1	10	24	75	35	50	29	29	20	32	46	14	8	19	52	26	19	27	15	26	7	42	48	68	39
COPA	16639	14848	20273	11211	15042	15764	16891	14482	13149	14708	16030	11756	17944	14606	18003	13213	15467	14731	14042	17369	23729	22896	26986	20638
SUMO1P3	1295	1211	1406	924	1131	1202	1262	852	1031	1002	1293	797	1135	1080	1253	1012	968	960	1110	1255	1642	1720	2165	1551
NCSTN	4556	4010	5339	2895	3952	4370	4386	3621	3711	3685	4224	3046	4425	3728	4552	3358	3847	3502	3487	4438	5921	5951	6990	5163
VANGL2	2882	2682	3378	1962	2719	2784	2669	2345	2331	2326	2296	1782	2859	2183	2850	1904	2333	2302	2443	2124	3350	3451	4122	3299
SLAMF6	0	0	0	0	0	0	0	0	0	0	0	0	0	0	0	0	0	0	0	0	0	0	0	0
CD84	0	0	0	0	0	1	0	0	0	0	0	0	0	0	0	0	0	0	0	0	0	0	0	0
SLAMF1	0	0	0	0	0	0	0	0	0	0	0	0	0	0	0	0	0	0	0	0	0	0	0	0
CD48	0	0	0	0	0	0	0	0	0	0	0	0	0	0	0	0	0	0	0	0	0	0	0	0
SLAMF7	0	0	0	0	0	0	0	0	0	0	0	0	0	0	0	0	0	0	0	0	0	0	0	0
LY9	0	0	2	0	0	0	0	0	0	0	0	0	2	0	0	0	0	0	0	0	0	0	0	0
CD244	0	0	0	0	0	0	0	0	0	0	0	0	0	0	0	0	0	0	0	0	0	0	0	0
ITLN1	0	0	0	0	0	0	0	0	0	0	0	0	0	0	0	0	0	0	0	0	0	0	14	0
LOC101928372	0	0	0	0	0	0	0	0	0	0	0	0	0	0	0	0	0	0	0	0	0	0	0	0
ITLN2	0	0	0	0	0	0	0	0	0	0	0	0	0	0	0	0	0	0	0	0	0	0	0	0
F11R	1707	1490	1802	1103	1490	1466	1531	1263	1105	1308	1537	1128	1691	1211	1372	1148	1494	1251	1104	1697	1979	1734	2354	1713
TSTD1	0	0	3	4	0	4	0	0	0	0	1	7	0	0	4	0	0	0	0	0	4	0	1	0
USF1	2912	2464	3144	1752	2424	2555	2554	2124	2115	2219	2651	2038	2956	2313	2591	1993	2511	2006	1991	2314	3399	2992	4481	2768
ARHGAP30	27	26	34	11	12	22	32	10	18	16	19	9	18	14	50	28	25	19	19	29	66	15	26	6
NECTIN4	2	6	24	0	4	6	4	0	6	4	8	4	0	1	18	2	2	3	0	0	10	8	20	16
KLHDC9	29	30	23	12	8	30	20	30	12	22	12	10	14	23	28	11	26	10	14	40	22	12	10	26
PFDN2	3481	2960	3905	2406	2961	2991	3281	2576	2651	2316	2968	2103	3360	2327	3063	2519	2926	2615	2640	3031	3982	3915	4880	3901
NIT1	1452	1376	1876	884	1439	1231	1442	1165	1294	1271	1456	1026	1594	1181	1330	1261	1311	1159	1160	1267	2133	1769	2369	1543
DEDD	1498	1310	1836	970	1397	1586	1353	1244	1342	1196	1562	990	1528	1199	1518	1103	1292	1226	1098	1342	2025	1770	2429	1711
UFC1	4992	4285	5758	3344	4237	4499	4563	3963	4063	3978	4397	3516	4607	3704	4541	3208	4414	3733	3654	5276	6388	5976	7624	5751
USP21	2745	2571	2949	1858	2313	2873	2766	2251	2460	2367	2736	1880	2808	2519	2418	1937	2331	2363	2165	1967	3264	3246	3920	2976
PPOX	554	729	787	437	575	619	610	515	499	687	722	409	635	419	620	404	551	544	509	398	882	831	916	586
B4GALT3	4666	3999	4846	2945	3870	4063	4033	3433	3493	3416	3957	3385	4746	3854	4096	3233	3931	3874	3601	3961	5415	5178	6293	4920
ADAMTS4	2	20	5	4	16	11	20	4	8	0	10	0	20	8	0	6	0	0	4	0	6	2	4	2
NDUFS2	7073	6595	8479	5088	6738	7216	7051	6138	6185	6015	7001	4802	6935	5958	7104	5423	6726	6068	5926	6736	8937	8180	10013	7983
FCER1G	10	6	4	2	3	2	2	8	1	4	0	0	6	1	2	10	1	2	3	0	6	4	4	0
APOA2	0	2	0	0	0	0	2	0	0	0	0	3	0	0	0	0	0	0	1	38	0	2	0	0
TOMM40L	1803	1657	2109	1215	1467	1728	1721	1382	1430	1315	1868	1390	1771	1425	1660	1229	1725	1426	1359	1619	2503	2147	2631	2118
MIR5187	0	3	0	0	4	1	1	0	1	3	2	0	0	0	0	0	1	3	3	0	0	4	1	0
NR1I3	66	77	89	34	65	84	56	43	76	54	89	48	58	60	55	39	72	69	61	32	103	96	112	66
PCP4L1	0	0	10	0	0	0	0	0	4	0	0	0	0	0	0	0	0	0	0	0	6	0	0	0
MPZ	14	8	13	8	22	17	26	6	32	6	20	22	30	8	4	10	28	20	12	4	50	25	26	9
SDHC	6514	5612	7602	4096	5598	6091	5944	5061	4924	5042	5968	4143	6388	4862	5966	4598	5459	4897	4423	6171	8299	8037	9969	7435
CFAP126	463	418	516	360	456	365	410	342	322	401	543	377	430	382	486	367	379	409	341	510	600	616	785	523
TRV-CAC1-1	0	0	1	0	0	1	3	1	0	0	1	0	0	2	6	0	0	2	0	0	4	2	0	2
TRE-TTC4-2	0	0	0	0	2	0	0	0	1	6	0	1	0	0	1	0	0	0	0	0	3	1	2	4
TRN-GTT2-2	0	0	0	0	0	0	0	0	0	0	0	0	0	0	0	0	0	0	0	0	2	0	0	0
TRG-TCC4-1	0	0	0	0	0	0	0	0	0	0	0	0	0	0	0	0	0	0	0	0	0	0	0	0
TRD-GTC2-1	0	0	0	0	0	0	0	0	0	0	0	0	0	0	0	0	0	0	0	0	0	0	0	0
TRL-CAG1-1	0	0	0	0	0	0	0	0	0	0	0	0	0	0	0	0	0	0	0	0	0	0	0	0
TRG-GCC1-1	0	0	0	0	0	0	0	0	0	0	0	0	0	0	0	0	0	0	0	0	0	0	0	0
TRE-CTC1-2	0	0	0	0	0	0	0	0	0	0	0	0	0	0	0	0	0	0	0	0	0	0	0	0
TRG-TCC2-2	0	0	0	0	0	0	0	0	0	0	0	0	0	0	0	0	0	0	0	0	0	0	0	0
TRD-GTC2-2	0	0	0	0	0	0	0	0	0	0	0	0	0	0	0	0	0	0	0	0	0	0	0	0
TRL-CAG1-2	0	0	0	0	0	0	0	0	0	0	0	0	0	0	0	0	0	0	0	0	0	0	0	0
TRG-GCC1-2	0	0	0	0	0	0	0	0	0	0	0	0	0	0	0	0	0	0	0	0	0	0	0	0
TRE-CTC1-3	0	0	0	0	0	0	0	0	0	0	0	0	0	0	0	0	0	0	0	0	0	0	0	0
TRG-TCC2-3	0	0	0	0	0	0	0	0	0	0	0	0	0	0	0	0	0	0	0	0	0	0	0	0
TRD-GTC2-3	0	0	0	0	0	0	0	0	0	0	0	0	0	0	0	0	0	0	0	0	0	0	0	0
TRL-CAG1-3	0	0	0	0	0	0	0	0	0	0	0	0	0	0	0	0	0	0	0	0	0	0	0	0
TRG-GCC1-3	0	0	0	0	0	0	0	0	0	0	0	0	0	0	0	0	0	0	0	0	0	0	0	0
TRE-CTC1-4	0	0	0	0	0	0	0	0	0	0	0	0	0	0	0	0	0	0	0	0	0	0	0	0
TRG-TCC2-4	0	0	0	0	0	0	0	0	0	0	0	0	0	0	0	0	0	0	0	0	0	0	0	0
TRD-GTC2-4	0	0	0	0	0	0	0	0	0	0	0	0	0	0	0	0	0	0	0	0	0	0	0	0
TRL-CAG1-4	0	0	0	0	0	0	0	0	0	0	0	0	0	0	0	0	0	0	0	0	0	0	0	0
TRG-GCC1-4	0	0	0	0	0	0	0	0	0	0	0	0	0	0	0	0	0	0	0	0	0	0	0	0
TRE-CTC1-5	0	0	0	0	0	0	0	0	0	0	0	0	0	0	0	0	0	0	0	0	0	0	0	0
TRG-TCC2-5	0	0	0	0	0	0	0	0	0	0	0	0	0	0	0	0	0	0	0	0	0	0	0	0
TRD-GTC2-5	0	0	0	0	0	0	0	0	0	0	0	0	0	0	0	0	0	0	0	0	0	0	0	0
TRL-CAG1-5	0	0	0	0	0	0	0	0	0	0	0	0	0	0	0	0	0	0	0	0	0	0	0	0
TRG-GCC4-1	0	0	0	0	0	0	0	0	0	0	0	0	0	0	0	0	0	0	0	0	0	0	0	0
FCGR2A	4	7	5	0	5	9	4	0	4	6	0	6	2	0	2	0	6	9	1	0	26	10	22	0
TRG-GCC2-1	0	0	0	0	0	0	0	0	0	0	0	0	0	0	0	0	0	0	0	0	0	0	0	0
HSPA6	28	30	10	20	16	31	29	33	22	34	4	29	54	40	47	18	45	37	27	21	22	49	26	53
TRL-CAG1-6	0	0	0	0	0	0	0	0	0	0	0	0	0	0	0	0	0	0	0	0	0	0	0	0
TRG-TCC2-6	0	0	0	0	0	0	0	0	0	0	0	0	0	0	0	0	0	0	0	0	0	0	0	0
[truncated: 26,398 more rows]
